# Supplementary material for: Transition-metal-free iterative two-fold reductive coupling and 1,3-borotropic shift to form 1,4-skipped dienes
Source: Royal Society of Chemistry journal article supplement (doi:10.1039/d4ob01389a), 2024-01-01

# Supporting Information

## Transition metal-free iterative two-fold reductive coupling and 1,3 borotropic shift to form 1,4-skipped dienes

Kasarla Varalaxmi,<sup>a,b</sup> Kangkan Pradhan,<sup>ac</sup> Hasina Mamataj Begam,<sup>a</sup> Arghya Polley,<sup>a,c</sup> Deepak  
Kumar<sup>a</sup> and Ranjan Jana<sup>\*a,c</sup>

<sup>a</sup>Organic and Medicinal Chemistry Division, CSIR-Indian Institute of Chemical Biology, 4  
Raja S. C. Mullick Road, Jadavpur, Kolkata-700032, West Bengal, India E-mail:

[rjana@iicb.res.in](mailto:rjana@iicb.res.in)

<sup>b</sup>Medicinal Chemistry Division, National Institute of Pharmaceutical Education and Research  
(NIPER), Kolkata-700054, West Bengal, India.

<sup>c</sup>Academy of Scientific and Innovative Research (AcSIR), Ghaziabad 201 002, Uttar Pradesh,  
India.

## Table of Contents

|                                                                         |           |
|-------------------------------------------------------------------------|-----------|
| Table-1 Optimization of reaction condition for skipped diene .....      | S3        |
| Crystal structure.....                                                  | S3-S4     |
| Structural elucidation of cinnamaldehyde skipped diene.....             | S4        |
| Representative procedure for monoprenylation.....                       | S5        |
| Spectral data for monoprenylation.....                                  | S5-S6     |
| Representative procedure for diprenylation.....                         | S6-S37    |
| Representative procedure for unsymmetrical skipped diene compounds..... | S37       |
| Spectral data for unsymmetrical skipped diene compounds.....            | S38       |
| <sup>1</sup> H and <sup>13</sup> C NMR spectra.....                     | S39 -S108 |

**Table -1:** Optimization of reaction condition for skipped diene<sup>a,b</sup>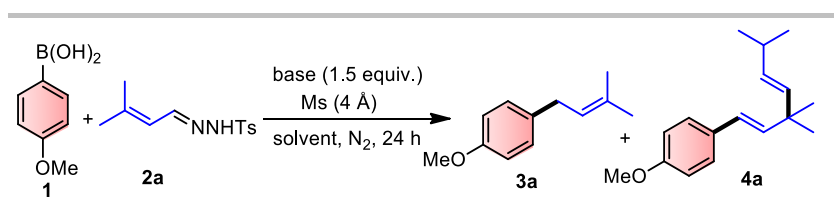

| Entry          | Base                            | Solvent     | Temp.(°C) | Yield 3a/4a |
|----------------|---------------------------------|-------------|-----------|-------------|
| 1              | Li <sub>2</sub> CO <sub>3</sub> | 1,4 dioxane | 120       | 0/23        |
| 2              | KF                              | 1,4 dioxane | 120       | 0/38        |
| 3              | CsF                             | 1,4 dioxane | 120       | 16/3        |
| 4 <sup>c</sup> | K <sub>2</sub> CO <sub>3</sub>  | MeCN        | 90        | 11/6        |
| 5 <sup>c</sup> | K <sub>2</sub> CO <sub>3</sub>  | THF         | 90        | 15/8        |
| 6 <sup>c</sup> | K <sub>2</sub> CO <sub>3</sub>  | DCE         | 90        | -           |
| 7 <sup>d</sup> | Na <sub>2</sub> CO <sub>3</sub> | 1,4 dioxane | 120       | 0/68        |
| 8              | Na <sub>2</sub> CO <sub>3</sub> | 1,4 dioxane | 90        | 0/56        |
| 9              | Na <sub>2</sub> CO <sub>3</sub> | 1,4 dioxane | 110       | 0/78        |

<sup>a</sup>All reactions were carried out in 0.5 mmol scale in presence of 4 Å <sup>b</sup>Yields refer to here are overall isolated yields. <sup>a</sup>All reactions were carried out in 0.5 mmol scale in presence of 4 Å <sup>b</sup>Yields referred to here are overall isolated yields. <sup>c</sup>Reaction was performed in absence of molecular sieves (MS). <sup>d</sup>Reaction was performed in a sealed tube.

### Crystal data for compound 4c

|                                      |                                        |
|--------------------------------------|----------------------------------------|
| Identification code                  | kv1_0m_a                               |
| Empirical formula                    | C <sub>20</sub> H <sub>30</sub>        |
| Formula weight                       | 270.461                                |
| Temperature/K                        | 115.0                                  |
| Crystal system                       | monoclinic                             |
| Space group                          | P2 <sub>1</sub> /n                     |
| a/Å                                  | 6.2632(6)                              |
| b/Å                                  | 24.832(3)                              |
| c/Å                                  | 11.5592(12)                            |
| α/°                                  | 90                                     |
| β/°                                  | 97.293(4)                              |
| γ/°                                  | 90                                     |
| Volume/Å <sup>3</sup>                | 1783.2(3)                              |
| Z                                    | 4                                      |
| ρ <sub>calc</sub> /g/cm <sup>3</sup> | 1.007                                  |
| μ/mm <sup>-1</sup>                   | 0.408                                  |
| F(000)                               | 601.5                                  |
| Crystal size/mm <sup>3</sup>         | 0.2 × 0.2 × 0.2                        |
| Radiation                            | Cu Kα (λ = 1.54178)                    |
| 2θ range for data collection/°       | 7.12 to 129.94                         |
| Index ranges                         | -7 ≤ h ≤ 5, -29 ≤ k ≤ 29, -13 ≤ l ≤ 13 |

|                                                |                                                                  |
|------------------------------------------------|------------------------------------------------------------------|
| Reflections collected                          | 23023                                                            |
| Independent reflections                        | 3022 [ $R_{\text{int}} = 0.1617$ , $R_{\text{sigma}} = 0.0708$ ] |
| Data/restraints/parameters                     | 3022/0/188                                                       |
| Goodness-of-fit on $F^2$                       | 1.038                                                            |
| Final R indexes [ $I \geq 2\sigma(I)$ ]        | $R_1 = 0.0757$ , $wR_2 = 0.2079$                                 |
| Final R indexes [all data]                     | $R_1 = 0.0819$ , $wR_2 = 0.2146$                                 |
| Largest diff. peak/hole / $e \text{ \AA}^{-3}$ | 0.44/-0.36                                                       |

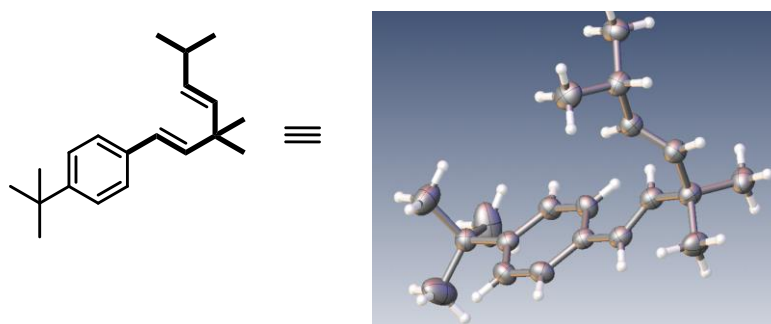

### Structural elucidation of cinnamaldehyde skipped diene

#### ((2E,5E)-6-(o-tolyl)hexa-2,5-diene-1,4-diyl)dibenzene (5r):

The assignments and position of the aromatic rings were ascertained by the combined use of HSQC/HMBC and DQF-COSY (  $\longleftrightarrow$  correlations starting from the  $\delta_{\text{C}} 39.42 / \delta_{\text{H}} 3.47$  ( $-\text{CH}_2$ ) displaying a cross peak with  $\delta_{\text{H}} 5.82 / \delta_{\text{C}} 130.28$  in COSY. Subsequent cross-peaks between  $\delta_{\text{H}} 5.82 / \delta_{\text{C}} 130.28$  -  $\delta_{\text{H}} 5.86 / \delta_{\text{C}} 133.62$  -  $\delta_{\text{H}} 4.36 / \delta_{\text{C}} 51.73$  -  $\delta_{\text{H}} 6.37 / \delta_{\text{C}} 133.87$  -  $\delta_{\text{H}} 6.72 / \delta_{\text{C}} 128.34$  in COSY confirmed the positions and assignments as displayed in Fig. 1. The position of aromatic ring bearing an ortho-substituted methyl was ascertained by the HMBC correlations between  $\delta_{\text{H}} 6.72$  -  $\delta_{\text{C}} 135.34$  -  $\delta_{\text{C}} 136.69$  -  $\delta_{\text{H}} 2.38 / \delta_{\text{C}} 19.68$ .

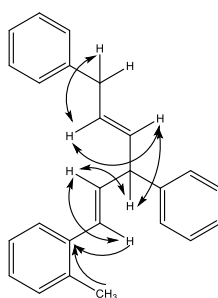

Figure 1

COSY  $\longleftrightarrow$

HMBC  $\longrightarrow$

### Representative procedure for monoprenylation:

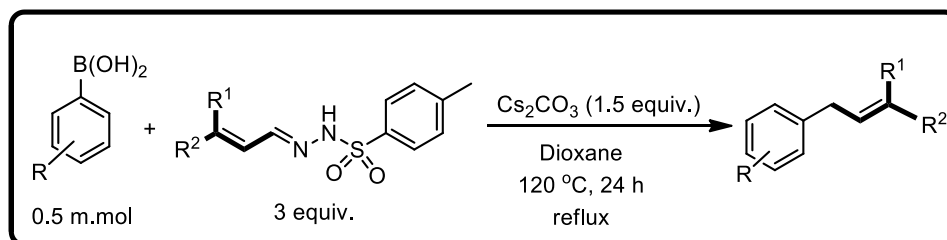

To an oven dried round bottom flask containing a stir bar added with corresponding boronic acid (0.5 mmol) and corresponding tosyl hydrazone (1.5 equivalent). Dry 1,4 Dioxane (2mL) was then added followed by  $\text{Cs}_2\text{CO}_3$  (1.5 equivalent, measured in glove box). Then the reaction mixture was purged with  $\text{N}_2$  gas for 2 minutes. The mixture allowed to reflux for  $120\text{ }^\circ\text{C}$  for 24 hours. After allotted time the reaction mixture was cooled to room temperature. The mixture was diluted with EtOAc (15 mL) and washed with water (25 mL) followed by brine solution (25 mL) and dried over  $\text{Na}_2\text{SO}_4$  and evaporated in *vacuo*. The crude mixture was loaded on a silica gel column chromatography and purified using (Hexane/EtOAc) to give the desired monoprenylation product.

### Spectral data for monoprenylation:

#### **1-methoxy-4-(3-methylbut-2-en-1-yl)benzene (3a)**

The same general procedure was followed. Column chromatography (Silica gel, eluting with 98:2 hexane/EtOAc) afforded the desired product as a pale-yellow solid (69.1 mg, 78% yield).

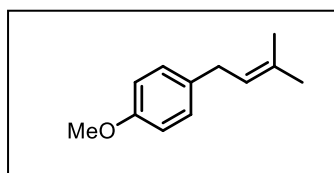

$^1\text{H}$  NMR (600 MHz,  $\text{CDCl}_3$ ):  $\delta$  1.73 (s, 3H),  $\delta$  1.76 (s, 3H), 3.30 (d, 2H,  $J = 7.3$  Hz), 3.80 (s, 3H), 5.31-5.34 (m, 1H), 6.84 (d, 2H,  $J = 8.5$  Hz), 7.11 (d, 2H,  $J = 8.5$  Hz);  $^{13}\text{C}$  NMR (150 MHz,  $\text{CDCl}_3$ ): 17.3, 25.3, 32.9, 54.8, 113.3, 123.1, 128.7, 131.7, 133.4, 157.2; HRMS (EI, m/z) calcd. For  $\text{C}_{12}\text{H}_{16}\text{O}$   $[\text{M}]^+$ : 176.1201; found: 176.1206.

### 1-(3-methylbut-2-en-1-yl)-4-nitrobenzene (3b)

The same general procedure was followed. Column chromatography (Silica gel, eluting with 98:2 hexane/EtOAc) afforded the desired product as a white solid (75.5 mg, 79% yield).

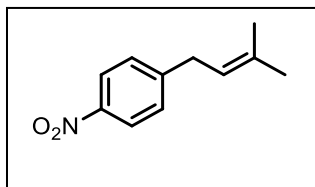

$^1\text{H}$  NMR (600 MHz,  $\text{CDCl}_3$ ):  $\delta$  1.73 (s, 3H), 1.78 (s, 3H), 3.44 (d, 2H,  $J = 7.3$  Hz), 5.28-5.31 (m, 1H), 7.32 (d, 2H,  $J = 8.7$  Hz), 8.13 (d, 2H,  $J = 8.7$  Hz);  $^{13}\text{C}$  NMR (150 MHz,  $\text{CDCl}_3$ ):  $\delta$  17.8, 25.6, 34.1, 121.1, 123.5, 129.0, 134.4, 146.2, 149.6; HRMS (EI,  $m/z$ ) calcd. For  $\text{C}_{11}\text{H}_{13}\text{NO}_2$   $[\text{M}]^+$ : 191.0946; found: 191.0926.

### 4-(3-methylbut-2-en-1-yl)benzotrile (3c)

The same general procedure was followed. Column chromatography (Silica gel, eluting with 98:2 hexane/EtOAc) afforded the desired product as a white solid (36.0 mg, 42% yield).

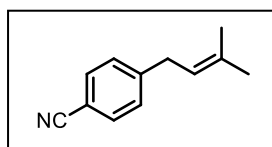

$^1\text{H}$  NMR (400 MHz,  $\text{CDCl}_3$ ):  $\delta$  1.69 (s, 3H),  $\delta$  1.74 (s, 3H), 3.37 (d, 2H,  $J = 7.3$  Hz), 5.23-5.28 (m, 1H), 7.25 (d, 2H,  $J = 8.2$  Hz), 7.53 (dd, 2H,  $J_1 = 6.4$  Hz,  $J_2 = 1.5$  Hz);  $^{13}\text{C}$  NMR (100 MHz,  $\text{CDCl}_3$ ):  $\delta$  17.9, 25.7, 34.5, 109.6, 119.2, 121.3, 129.1, 132.2, 134.3, 147.5; HRMS (EI,  $m/z$ ) calcd. For  $\text{C}_{12}\text{H}_{13}\text{N}$   $[\text{M}]^+$ : 171.1048; found: 171.1039.

### Representative procedure for diprenylation:

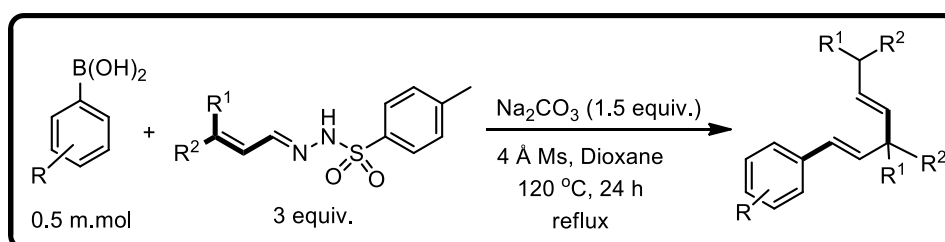

To an oven dried round bottom flask containing a stir bar added with corresponding boronic acid (0.5 mmol) and corresponding tosyl hydrazone (1.5 equivalent). Dry 1,4 Dioxane (2mL) was then added followed by Na<sub>2</sub>CO<sub>3</sub>(1.5 equivalent) and molecular sieves. Then the reaction mixture was purged with N<sub>2</sub> gas for 2 minutes. The mixture allowed to reflux for 120 °C for 24 hours. After allotted time the reaction mixture was cooled to room temperature. The mixture was diluted with EtOAc (15 mL) and washed with water (25 mL) followed by brine solution (25 mL) and dried over Na<sub>2</sub>SO<sub>4</sub> and evaporated in *vacuo*. The crude mixture was loaded on a silica gel column chromatography and purified using (Hexane/EtOAc) to give the desired diprenylation product.

#### **Spectral data for 1,4-Skipped dienes:**

##### **1-methoxy-4-((1E,4E)-3,3,6-trimethylhepta-1,4-dien-1-yl)benzene (4a)**

The same general procedure was followed. Column chromatography (Silica gel, eluting with 98:2 hexane/EtOAc) afforded the desired product as a pale brown liquid (104 mg, 85% yield).

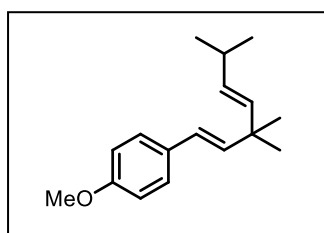

<sup>1</sup>H NMR (400 MHz, CDCl<sub>3</sub>): δ 0.97 (d, 6H, *J* = 6.7 Hz), 1.16 (s, 6H), 2.20-2.32 (m, 1H), 3.79 (s, 3H), 5.34 (dd, 1H, *J*<sub>1</sub> = 15.7 Hz, *J*<sub>2</sub> = 6.2 Hz), 5.42 (d, 1H, *J* = 16.0 Hz), 6.06 (d, 1H, *J* = 16.1 Hz), 6.23 (d, 1H, *J* = 16.2 Hz), 6.83 (dd, 1H, *J*<sub>1</sub> = 6.7 Hz, *J*<sub>2</sub> = 2.0 Hz), 7.29 (dd, 1H, *J*<sub>1</sub> = 6.7 Hz, *J*<sub>2</sub> = 1.9 Hz); <sup>13</sup>C NMR (100 MHz, CDCl<sub>3</sub>): δ 22.9, 27.8, 31.2, 38.3, 55.3, 114.0, 125.1, 127.2, 130.9, 134.0, 135.9, 138.0, 158.7; HRMS (EI, m/z) calcd. For C<sub>17</sub>H<sub>24</sub>O [M]<sup>+</sup>: 244.1827; found: 244.1823.

##### **4-((1E,4E)-3,3,6-trimethylhepta-1,4-dien-1-yl)-1,1'-biphenyl (4b)**

The same general procedure was followed. Column chromatography (Silica gel, eluting with hexane) afforded the desired product as a white solid (142.6 mg, 98% yield).

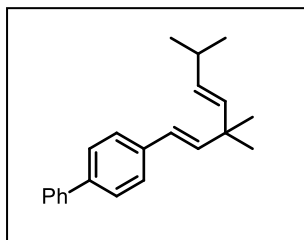

$^1\text{H}$  NMR (400 MHz,  $\text{DMSO-d}_6$ ):  $\delta$  0.92 (d, 6H,  $J = 6.7$  Hz), 1.13 (s, 6H), 2.18-2.27 (m, 1H), 5.33 (dd, 1H,  $J_1 = 15.7$  Hz,  $J_2 = 6.3$  Hz), 5.43 (dd, 1H,  $J_1 = 1.0$  Hz,  $J_2 = 6.3$  Hz), 6.29 (s, 1H), 7.30 (tt, 1H,  $J_1 = 7.3$  Hz,  $J_2 = 1.2$  Hz), 7.39-7.43 (m, 2H), 7.45 (dd, 2H,  $J_1 = 6.6$  Hz,  $J_2 = 2.0$  Hz), 7.57 (dd, 2H,  $J_1 = 6.5$  Hz,  $J_2 = 1.8$  Hz), 7.60-7.63 (m, 2H);  $^{13}\text{C}$  NMR (100 MHz,  $\text{DMSO-d}_6$ ):  $\delta$  23.1, 27.9, 31.0, 38.6, 125.4, 126.9, 127.1, 127.2, 127.8, 129.4, 134.0, 135.9, 137.0, 139.0, 140.1, 140.2; HRMS (EI,  $m/z$ ) calcd. For  $\text{C}_{22}\text{H}_{26}$   $[\text{M}]^+$ : 290.2035; found: 290.2029.

**1-(tert-butyl)-4-((1E,4E)-3,3,6-trimethylhepta-1,4-dien-1-yl)benzene (4c)**

The same general procedure was followed. Column chromatography (Silica gel, eluting with hexane) afforded the desired product as brownish yellow liquid (95.8 mg, 70% yield).

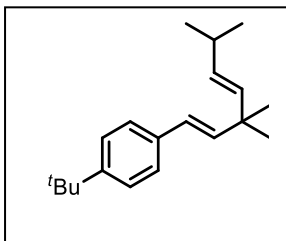

$^1\text{H}$  NMR (400 MHz,  $\text{CDCl}_3$ ):  $\delta$  1.04 (d, 6H,  $J = 6.7$  Hz), 1.23 (s, 6H), 1.36 (s, 9H), 2.26-2.38 (m, 1H), 5.38-5.51 (m, 2H), 6.29 (q, 2H,  $J = 26.7$  Hz), 7.37 (s, 4H);  $^{13}\text{C}$  NMR (100 MHz,  $\text{CDCl}_3$ ):  $\delta$  22.9, 27.8, 31.2, 31.4, 34.6, 38.4, 125.5, 125.9, 134.1, 135.3, 135.9, 139.3, 149.9; HRMS (EI,  $m/z$ ) calcd. For  $\text{C}_{20}\text{H}_{30}$   $[\text{M}]^+$ : 270.2348; found: 270.2355.

**1-fluoro-4-((1E,4E)-3,3,6-trimethylhepta-1,4-dien-1-yl)benzene (4d)**

The same general procedure was followed. Column chromatography (Silica gel, eluting with hexane) afforded the desired product as white liquid (75.6 mg, 65% yield).

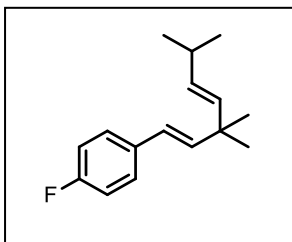



$^1\text{H}$  NMR (400 MHz,  $\text{CDCl}_3$ ):  $\delta$  0.99 (d, 6H,  $J = 6.7$  Hz), 1.18 (s, 6H), 2.22-2.33 (m, 1H), 5.33-5.44 (m, 2H), 6.19 (q, 2H,  $J = 38.4$  Hz), 6.97 (t, 2H,  $J = 8.7$  Hz), 7.30-7.33 (m, 2H);  $^{13}\text{C}$  NMR (100 MHz,  $\text{CDCl}_3$ ):  $\delta$  22.8, 27.6, 31.1, 38.3, 115.3 (d,  $J = 21.3$  Hz), 124.6, 127.5 (d,  $J = 7.8$  Hz), 134.1 (d,  $J = 2.7$  Hz), 134.3, 135.5, 139.8, 161.9 (d,  $J = 244.2$  Hz); HRMS (EI,  $m/z$ ) calcd. For  $\text{C}_{16}\text{H}_{21}\text{F}$   $[\text{M}]^+$ : 232.1627; found: 232.1621.

**1-bromo-4-((1E,4E)-3,3,6-trimethylhepta-1,4-dien-1-yl)benzene (4e)**

The same general procedure was followed. Column chromatography (Silica gel, eluting with hexane) afforded the desired product as yellowish liquid (118 mg, 80% yield).

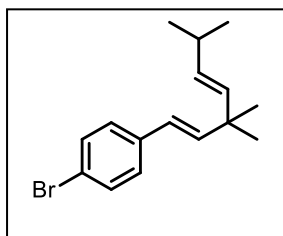

$^1\text{H}$  NMR (400 MHz,  $\text{CDCl}_3$ ):  $\delta$  0.98 (d, 6H,  $J = 6.7$  Hz), 1.17 (s, 6H), 2.21-2.32 (m, 1H), 5.32-5.43 (m, 2H), 6.21 (q, 2H,  $J = 3.2$  Hz), 7.21 (dd, 2H,  $J_1 = 6.6$  Hz,  $J_2 = 1.4$  Hz), 7.40 (dd, 2H,  $J_1 = 6.6$  Hz,  $J_2 = 1.9$  Hz);  $^{13}\text{C}$  NMR (100 MHz,  $\text{CDCl}_3$ ):  $\delta$  22.8, 27.6, 31.2, 38.4, 120.4, 124.6, 127.7, 131.5, 134.4, 135.3, 137.0, 140.9; HRMS (EI,  $m/z$ ) calcd. For  $\text{C}_{16}\text{H}_{21}\text{Br}$   $[\text{M}]^+$ : 292.0827; found: 292.0826.

**1-iodo-4-((1E,4E)-3,3,6-trimethylhepta-1,4-dien-1-yl)benzene (4f)**

The same general procedure was followed. Column chromatography (Silica gel, eluting with hexane) afforded the desired product as yellowish white liquid (100.2 mg, 58% yield).

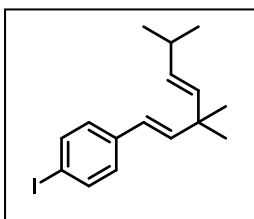

$^1\text{H}$  NMR (400 MHz,  $\text{CDCl}_3$ ):  $\delta$  0.98 (d, 6H,  $J = 6.7$  Hz), 1.17 (s, 6H), 2.21-2.32 (m, 1H), 5.31-5.43 (m, 2H), 6.20 (s, 2H), 7.09 (dd, 2H,  $J_1 = 6.5$  Hz,  $J_2 = 1.8$  Hz), 7.59 (dd, 2H,  $J_1 = 6.5$  Hz,  $J_2 = 1.8$  Hz);  $^{13}\text{C}$  NMR (100 MHz,  $\text{CDCl}_3$ ):  $\delta$  22.9, 27.6, 31.2, 38.4, 91.8, 124.8, 128.0, 134.4,

135.3, 137.5, 137.6, 141.0; HRMS (EI, m/z) calcd. For C<sub>16</sub>H<sub>21</sub>I [M]<sup>+</sup>: 340.0688; found: 340.0689.

#### 1-chloro-4-((1E,4E)-3,3,6-trimethylhepta-1,4-dien-1-yl)benzene (4g)

The same general procedure was followed. Column chromatography (Silica gel, eluting with hexane) afforded the desired product as white liquid (93.3 mg, 75% yield).

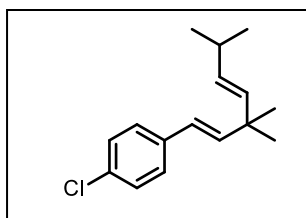

<sup>1</sup>H NMR (300 MHz, CDCl<sub>3</sub>): δ 1.01 (d, 6H, *J* = 6.6 Hz), 1.20 (s, 6H), 2.22-2.37 (m, 1H), 5.34-5.48 (m, 2H), 6.24 (q, 2H, *J* = 7.1 Hz), 7.29 (q, 4H, *J* = 2.7 Hz); <sup>13</sup>C NMR (100 MHz, CDCl<sub>3</sub>): δ 22.8, 27.6, 31.2, 38.4, 124.6, 127.4, 128.6, 132.4, 134.4, 135.4, 136.5, and 140.7; HRMS (EI, m/z) calcd. For C<sub>16</sub>H<sub>21</sub>Cl [M]<sup>+</sup>: 248.1332; found: 248.1345.

#### 4-((1E,4E)-3,3,6-trimethylhepta-1,4-dien-1-yl)phenol (4h)

The same general procedure was followed. Column chromatography (Silica gel, eluting with 95:5 hexane/EtOAc) afforded the desired product as a pale-yellow liquid (113 mg, 98% yield).

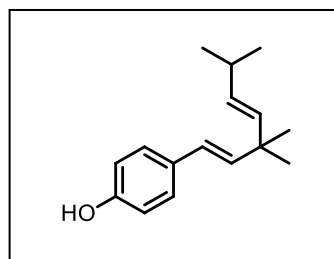

<sup>1</sup>H NMR (400 MHz, CDCl<sub>3</sub>): δ 0.98 (d, 6H, *J* = 6.7 Hz), 1.16 (s, 6H), 2.21-2.32 (m, 1H), 5.30 (s, 1H), 5.35 (dd, 1H, *J*<sub>1</sub> = 15.7 Hz, *J*<sub>2</sub> = 6.1 Hz), 5.42 (d, 1H, *J* = 15.8 Hz), 6.06 (d, 1H, *J* = 16.2 Hz), 6.22 (d, 1H, *J* = 16.1 Hz), 6.77 (dd, 2H, *J*<sub>1</sub> = 6.6 Hz, *J*<sub>2</sub> = 2.1 Hz), 7.24 (dd, 2H, *J*<sub>1</sub> = 6.5 Hz, *J*<sub>2</sub> = 2.0 Hz); <sup>13</sup>C NMR (100 MHz, CDCl<sub>3</sub>): δ 22.8, 27.7, 31.1, 38.2, 115.4, 125.0,

127.4, 131.0, 134.0, 135.8, 138.0, 154.6; HRMS (EI, m/z) calcd. For C<sub>16</sub>H<sub>22</sub>O [M]<sup>+</sup>: 230.1671; found: 230.1669.

***N,N*-dimethyl-4-((1*E*,4*E*)-3,3,6-trimethylhepta-1,4-dien-1-yl)aniline (4i)**

The same general procedure was followed. Column chromatography (Silica gel, eluting with 95:5 hexane/EtOAc) afforded the desired product as a pale-yellow liquid (113.2 mg, 88% yield).

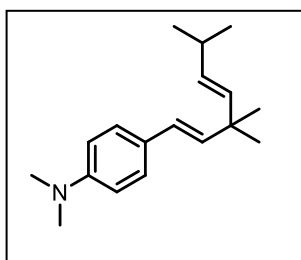

<sup>1</sup>H NMR (400 MHz, CDCl<sub>3</sub>): δ 0.98 (d, 6H, *J* = 6.7 Hz), 1.16 (s, 6H), 2.22-2.30 (m, 1H), 2.93 (s, 6H), 5.34 (dd, 1H, *J*<sub>1</sub> = 15.7 Hz, *J*<sub>2</sub> = 6.2 Hz), 5.43 (d, 1H, *J* = 15.6 Hz), 6.01 (d, 1H, *J* = 16.1 Hz), 6.21 (d, 1H, *J* = 16.1 Hz), 6.68 (dd, 2H, *J*<sub>1</sub> = 6.7 Hz, *J*<sub>2</sub> = 2.0 Hz), 7.26 (dd, 2H, *J*<sub>1</sub> = 6.7 Hz, *J*<sub>2</sub> = 2.0 Hz); <sup>13</sup>C NMR (100 MHz, CDCl<sub>3</sub>): δ 22.9, 27.9, 31.1, 38.2, 40.7, 112.8, 122.4, 125.3, 126.9, 133.7, 136.1, 136.2, 149.8; HRMS (EI, m/z) calcd. For C<sub>18</sub>H<sub>27</sub>N [M]<sup>+</sup>: 257.2143; found: 257.2145.

**1-((1*E*,4*E*)-3,3,6-trimethylhepta-1,4-dien-1-yl)-4-ethynylbenzene (4j)**

The same general procedure was followed. Column chromatography (Silica gel, eluting with hexane) afforded the desired product as a pale-yellow liquid (102.4 mg, 86% yield).

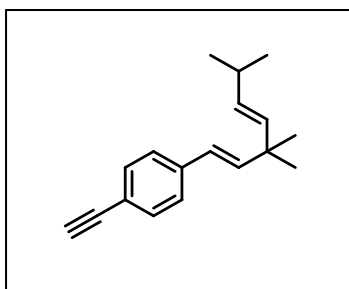

$^1\text{H}$  NMR (400 MHz,  $\text{CDCl}_3$ ):  $\delta$  0.99 (d, 6H,  $J = 6.7$  Hz), 1.18 (s, 6H), 2.22-2.34 (m, 1H), 3.08 (s, 1H), 5.36 (dd, 1H,  $J_1 = 15.6$  Hz,  $J_2 = 5.8$  Hz), 5.43 (d, 1H,  $J = 15.8$  Hz), 6.21-6.30 (m, 2H), 7.31 (dd, 2H,  $J_1 = 6.5$  Hz,  $J_2 = 1.8$  Hz), 7.42 (dd, 2H,  $J_1 = 6.4$  Hz,  $J_2 = 1.7$  Hz);  $^{13}\text{C}$  NMR (100 MHz,  $\text{CDCl}_3$ ):  $\delta$  22.8, 27.6, 31.2, 38.5, 77.4, 83.9, 120.3, 125.1, 126.0, 132.3, 134.4, 135.3, 138.6, 141.4; HRMS (EI,  $m/z$ ) calcd. For  $\text{C}_{18}\text{H}_{22}$   $[\text{M}]^+$ :238.1722; found: 238.1720.

**1-((1E,4E)-3,3,6-trimethylhepta-1,4-dien-1-yl)-4-vinylbenzene (4k)**

The same general procedure was followed. Column chromatography (Silica gel, eluting with hexane) afforded the desired product as a pale-yellow liquid (93.7 mg, 78% yield).

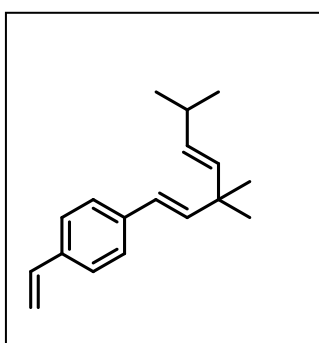

$^1\text{H}$  NMR (400 MHz,  $\text{CDCl}_3$ ):  $\delta$  0.98 (d, 6H,  $J = 6.7$  Hz), 1.18 (s, 6H), 2.21-2.32 (m, 1H), 5.20 (dd, 1H,  $J_1 = 10.9$  Hz,  $J_2 = 0.9$  Hz), 5.35 (dd, 1H,  $J_1 = 9.6$  Hz,  $J_2 = 6.0$  Hz), 5.43 (d, 1H,  $J = 16.2$  Hz), 5.71 (dd, 1H,  $J_1 = 17.6$  Hz,  $J_2 = 0.9$  Hz), 6.21 (d, 1H,  $J = 16.1$  Hz), 6.28 (d, 1H,  $J = 16.2$  Hz), 6.68 (dd, 1H,  $J_1 = 17.6$  Hz,  $J_2 = 10.9$  Hz), 7.33 (d, 3H,  $J_1 = 1.9$  Hz);  $^{13}\text{C}$  NMR (100 MHz,  $\text{CDCl}_3$ ):  $\delta$  22.8, 27.6, 31.2, 38.4, 113.2, 125.3, 126.3, 126.4, 134.2, 135.6, 136.2, 136.6, 137.6, 140.1; HRMS (EI,  $m/z$ ) calcd. For  $\text{C}_{18}\text{H}_{24}$   $[\text{M}]^+$ :240.1878; found: 240.1800.

**((1E,4E)-3,3,6-trimethylhepta-1,4-dien-1-yl)benzene (4l)**

The same general procedure was followed. Column chromatography (Silica gel, eluting with hexane) afforded the desired product as colourless liquid (81 mg, 75% yield).

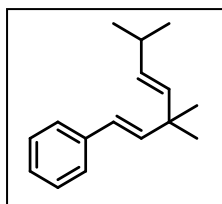

$^1\text{H}$  NMR (400 MHz,  $\text{CDCl}_3$ ):  $\delta$  1.02 (d, 6H,  $J = 6.8$  Hz), 1.22 (s, 6H), 2.24-2.36 (m, 1H), 5.39 (dd, 2H,  $J_1 = 15.7$  Hz,  $J_2 = 9.6$  Hz), 5.47 (d, 1H,  $J = 16.2$  Hz), 6.29 (dd, 2H,  $J_1 = 36.2$  Hz,  $J_2 =$

16.2 Hz), 7.21 (tt, 1H,  $J_1 = 7.2$  Hz,  $J_2 = 1.2$  Hz), 7.29-7.33 (m, 2H), 7.39 (dd, 2H,  $J_1 = 8.6$  Hz,  $J_2 = 1.4$  Hz);  $^{13}\text{C}$  NMR (100 MHz,  $\text{CDCl}_3$ ):  $\delta$  22.9, 27.7, 31.2, 38.4, 125.7, 126.2, 126.9, 128.5, 134.2, 135.7, 138.1, 140.0; HRMS (EI,  $m/z$ ) calcd. For  $\text{C}_{16}\text{H}_{22}$   $[\text{M}]^+$ : 214.1722; found: 214.1711.

#### Methyl(3-((1E,4E)-3,3,6-trimethylhepta-1,4-dien-1-yl)phenyl)sulfane (4m)

The same general procedure was followed. Column chromatography (Silica gel, eluting with 99:1 hexane/EtOAc) afforded the desired product as a pale-yellow liquid (119.7 mg, 92% yield).

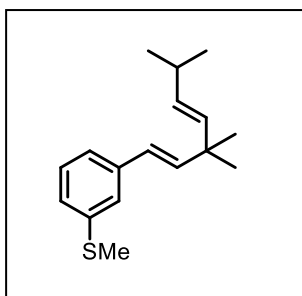

$^1\text{H}$  NMR (400 MHz,  $\text{CDCl}_3$ ):  $\delta$  0.99 (d, 6H,  $J = 6.7$  Hz), 1.18 (s, 6H), 2.21-2.23 (m, 1H), 2.49 (s, 3H), 5.35 (dd, 1H,  $J_1 = 15.7$  Hz,  $J_2 = 5.9$  Hz), 5.42 (d, 1H,  $J = 15.9$  Hz), 6.23 (q, 2H,  $J = 5.3$  Hz), 7.08-7.10 (m, 1H), 7.14 (dt, 1H,  $J_1 = 7.7$  Hz,  $J_2 = 1.3$  Hz), 7.21 (t, 1H,  $J = 7.6$  Hz), 7.26 (t, 1H,  $J = 1.7$  Hz);  $^{13}\text{C}$  NMR (100 MHz,  $\text{CDCl}_3$ ):  $\delta$  16.0, 22.8, 27.6, 31.1, 38.4, 123.1, 124.5, 125.1, 125.2, 128.9, 134.3, 135.4, 138.5, 138.7, 140.7; HRMS (EI,  $m/z$ ) calcd. For  $\text{C}_{17}\text{H}_{24}\text{S}$   $[\text{M}]^+$ : 260.1599; found: 260.1579.

#### 1-nitro-3-((1E,4E)-3,3,6-trimethylhepta-1,4-dien-1-yl)benzene (4n)

The same general procedure was followed. Column chromatography (Silica gel, eluting with 97:3 hexane/EtOAc) afforded the desired product as a pale-yellow liquid (97.2 mg, 75% yield).

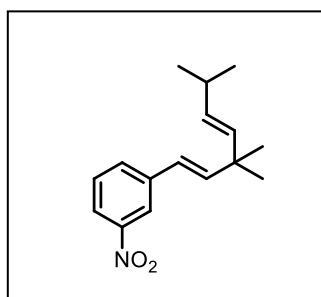

$^1\text{H}$  NMR (400 MHz,  $\text{CDCl}_3$ ):  $\delta$  0.98 (d, 6H,  $J = 6.7$  Hz), 1.19 (s, 6H), 2.23-2.31 (m, 1H), 5.36 (dd, 1H,  $J_1 = 15.7$  Hz,  $J_2 = 5.3$  Hz), 5.41 (d, 1H,  $J = 15.7$  Hz), 6.33 (q, 2H,  $J = 1.2$  Hz), 7.43 (t, 1H,  $J = 7.9$  Hz), 7.63 (dt, 1H,  $J_1 = 7.7$  Hz,  $J_2 = 1.3$  Hz), 8.00-8.03 (m, 1H), 8.20 (t, 1H,  $J = 2.0$  Hz);  $^{13}\text{C}$  NMR (100 MHz,  $\text{CDCl}_3$ ):  $\delta$  22.8, 27.5, 31.2, 38.6, 120.6, 121.4, 123.8, 129.3, 132.1, 134.8, 139.9, 143.4, 148.6; HRMS (EI,  $m/z$ ) calcd. For  $\text{C}_{16}\text{H}_{21}\text{NO}_2$   $[\text{M}]^+$ : 259.1572; found: 259.1573.

### 1-(3-((1E,4E)-3,3,6-trimethylhepta-1,4-dien-1-yl)phenyl)ethan-1-one (4o)

The same general procedure was followed. Column chromatography (Silica gel, eluting with 98:2 hexane/EtOAc) afforded the desired product as colourless liquid (90 mg, 70% yield).

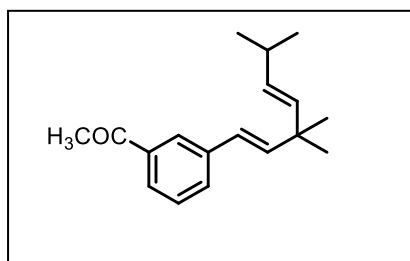

$^1\text{H}$  NMR (400 MHz,  $\text{CDCl}_3$ ):  $\delta$  0.97 (d, 6H,  $J = 6.7$  Hz), 1.18 (s, 6H), 2.20-2.32 (m, 1H), 2.59 (s, 3H), 5.32-5.43 (m, 2H), 6.30 (q, 2H,  $J = 5.2$  Hz), 7.36 (t, 1H,  $J = 7.7$  Hz), 7.52-7.55 (m, 1H), 7.73-7.76 (m, 1H), 7.92-7.93 (m, 1H);  $^{13}\text{C}$  NMR (100 MHz,  $\text{CDCl}_3$ ):  $\delta$  22.8, 26.7, 27.6, 31.1, 38.5, 124.9, 125.8, 126.8, 128.7, 130.7, 134.5, 135.2, 137.4, 138.5, 141.5, 198.4; HRMS (EI,  $m/z$ ) calcd. For  $\text{C}_{18}\text{H}_{24}\text{O}$   $[\text{M}]^+$ : 256.1827; found: 256.1832.

### Methyl 3-((1E,4E)-3,3,6-trimethylhepta-1,4-dien-1-yl)benzoate (4p)

The same general procedure was followed. Column chromatography (Silica gel, eluting with 99:1 hexane/EtOAc) afforded the desired product as a pale-yellow liquid (107 mg, 78% yield).

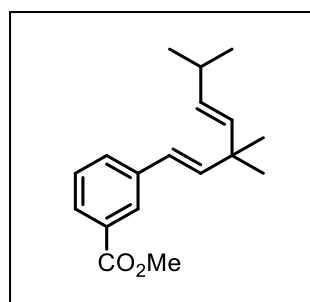

$^1\text{H}$  NMR (400 MHz,  $\text{CDCl}_3$ ):  $\delta$  0.98 (d, 6H,  $J = 6.7$  Hz), 1.18 (s, 6H), 2.21-2.32 (m, 1H), 3.91 (s, 3H), 5.35 (dd, 1H,  $J_1 = 15.7$  Hz,  $J_2 = 5.9$  Hz), 5.42 (d, 1H,  $J = 15.9$  Hz), 6.30 (q, 2H,  $J = 3.1$  Hz), 7.34 (t, 1H,  $J = 7.7$  Hz), 7.52 (dt, 1H,  $J_1 = 7.7$  Hz,  $J_2 = 1.4$  Hz), 7.84 (dt, 1H,  $J_1 = 8.0$  Hz,  $J_2 = 1.3$  Hz), 8.03 (t, 1H,  $J = 1.7$  Hz);  $^{13}\text{C}$  NMR (100 MHz,  $\text{CDCl}_3$ ):  $\delta$  22.8, 27.6, 31.9, 38.4, 52.1, 124.8, 127.1, 127.8, 128.5, 130.4, 130.6, 134.4, 135.3, 138.4, 141.3, 167.2; HRMS (EI,  $m/z$ ) calcd. For  $\text{C}_{18}\text{H}_{24}\text{O}_2$   $[\text{M}]^+$ : 272.1776; found: 272.1775.

#### 1-(trifluoromethyl)-3-((1E,4E)-3,3,6-trimethylhepta-1,4-dien-1-yl)benzene (4q)

The same general procedure was followed. Column chromatography (Silica gel, eluting with 98:2 hexane/EtOAc) afforded the desired product as colourless liquid (82.0 mg, 58% yield).

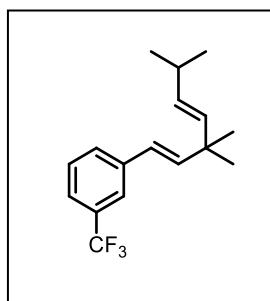

$^1\text{H}$  NMR (400 MHz,  $\text{CDCl}_3$ ):  $\delta$  1.01 (d, 6H,  $J = 6.7$  Hz), 1.21 (s, 6H), 2.23-2.35 (m, 1H), 5.36-5.46 (m, 2H), 6.31 (q, 2H,  $J = 5.3$  Hz), 7.37-7.45 (m, 2H), 7.52 (d, 1H,  $J = 7.5$  Hz), 7.61 (s, 1H);  $^{13}\text{C}$  NMR (100 MHz,  $\text{CDCl}_3$ ):  $\delta$  22.8, 27.5, 31.1, 38.5, 122.8 (q,  $J = 3.6$  Hz), 123.4 (q,  $J = 3.2$  Hz), 124.3 (q,  $J = 270.6$  Hz), 124.6, 128.9, 129.3, 130.9 (q,  $J = 31.8$  Hz), 134.6, 135.1, 138.8, 142.0; HRMS (EI,  $m/z$ ) calcd. For  $\text{C}_{17}\text{H}_{21}\text{F}_3$   $[\text{M}]^+$ : 282.1595; found: 282.1599.

#### 1-bromo-3-((1E,4E)-3,3,6-trimethylhepta-1,4-dien-1-yl)benzene (4r)

The same general procedure was followed. Column chromatography (Silica gel, eluting with hexane) afforded the desired product as pale yellowish liquid (102.6 mg, 70% yield).

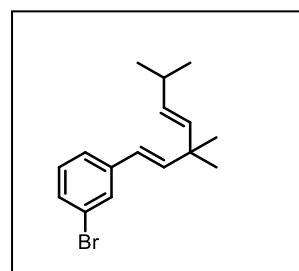

$^1\text{H}$  NMR (300 MHz,  $\text{CDCl}_3$ ):  $\delta$  1.01(d, 6H,  $J = 6.9$  Hz), 1.20 (s, 6H), 2.24-2.35 (m, 1H), 5.34-5.47 (m, 2H), 6.24 (s, 2H), 7.16 (t, 1H,  $J = 7.7$  Hz), 7.26-7.34 (m, 2H), 7.54 (s, 1H);  $^{13}\text{C}$  NMR (100 MHz,  $\text{CDCl}_3$ ):  $\delta$  22.8, 27.6, 31.2, 38.5, 122.8, 124.5, 124.9, 129.0, 129.7, 130.0, 134.5, 135.2, 140.3, 141.6; HRMS (EI,  $m/z$ ) calcd. For  $\text{C}_{16}\text{H}_{21}\text{Br}$   $[\text{M}]^+$ : 292.0827; found: 292.0828.

#### **1,3-dimethoxy-5-((1E,4E)-3,3,6-trimethylhepta-1,4-dien-1-yl)benzene (4s)**

The same general procedure was followed. Column chromatography (Silica gel, eluting with 98:2 hexane/ethyl acetate) afforded the desired product as a colourless liquid (107 mg, 78% yield).

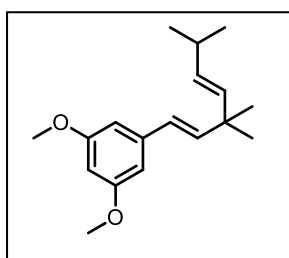

$^1\text{H}$  NMR (400 MHz,  $\text{CDCl}_3$ ):  $\delta$  0.98 (d, 6H,  $J = 6.7$  Hz), 1.18 (s, 6H), 2.21-2.33 (m, 1H), 3.79 (s, 6H), 5.33-5.44 (m, 2H), 6.21 (q, 2H,  $J = 3.8$  Hz), 6.33 (1H, t,  $J = 2.2$  Hz), 6.53 (d, 2H,  $J = 2.3$  Hz);  $^{13}\text{C}$  NMR (100 MHz,  $\text{CDCl}_3$ ):  $\delta$  22.8, 27.6, 31.1, 38.3, 55.3, 99.3, 104.2, 125.7, 134.3, 135.5, 140.1, 140.5, 160.9. HRMS (ESI,  $m/z$ ) calcd. For  $\text{C}_{18}\text{H}_{26}\text{O}_2$   $[\text{M}]^+$ : 274.1933; found: 274.1938.

#### **2-((1E,4E)-3,3,6-trimethylhepta-1,4-dien-1-yl)naphthalene (4t)**

The same general procedure was followed. Column chromatography (Silica gel, eluting with hexane) afforded the desired product as white liquid (67.2 mg, 50% yield).

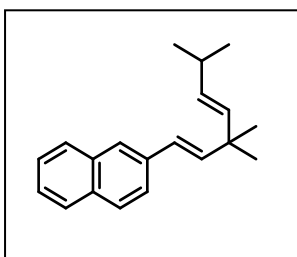

$^1\text{H}$  NMR (300 MHz,  $\text{CDCl}_3$ ):  $\delta$  1.08 (d, 6H,  $J = 6.7$  Hz), 1.30 (s, 6H), 2.29-2.44 (m, 1H), 5.43-5.57 (m, 2H), 6.47 (q, 2H,  $J = 22.4$  Hz), 7.47 (quin, 2H,  $J = 7.2$  Hz), 7.66 (d, 1H,  $J = 8.5$  Hz), 7.76 (s, 1H), 7.82 (q, 3H,  $J = 2.1$  Hz);  $^{13}\text{C}$  NMR (100 MHz,  $\text{CDCl}_3$ ):  $\delta$  22.9, 27.8, 31.3, 38.5,



123.8, 125.5, 125.7, 125.9, 126.2, 127.7, 127.9, 128.1, 132.8, 133.9, 134.3, 135.6, 135.7, 140.5; HRMS (EI, m/z) calcd. For C<sub>20</sub>H<sub>24</sub> [M]<sup>+</sup>: 264.1878; found: 264.1871.

#### 1-fluoro-2-((1E,4E)-3,3,6-trimethylhepta-1,4-dien-1-yl)benzene (4u)

The same general procedure was followed. Column chromatography (Silica gel, eluting with hexane) afforded the desired product as pale yellowish liquid (101.0 mg, 87% yield).

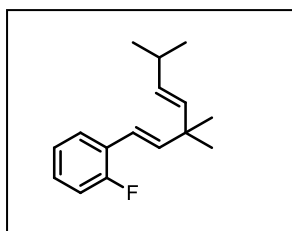

<sup>1</sup>H NMR (300 MHz, CDCl<sub>3</sub>): δ 0.97 (d, 6H, *J* = 6.7 Hz), 1.18 (s, 6H), 2.20-2.32 (m, 1H), 5.35 (dd, 1H, *J*<sub>1</sub> = 15.7 Hz, *J*<sub>2</sub> = 6.0 Hz), 5.42 (d, 1H, *J* = 16 Hz), 6.27 (d, 1H, *J* = 16.3 Hz), 6.46 (d, 1H, *J* = 16.3 Hz), 6.97-7.02 (m, 1H), 7.05 (td, 1H, *J*<sub>1</sub> = 7.4 Hz, *J*<sub>2</sub> = 1.2 Hz), 7.11-7.17 (m, 1H), 7.45 (td, 1H, *J*<sub>1</sub> = 7.6 Hz, *J*<sub>2</sub> = 1.7 Hz); <sup>13</sup>C NMR (150 MHz, CDCl<sub>3</sub>): δ 22.3, 27.0, 30.6, 38.2, 115.1 (d, *J* = 22.2 Hz), 117.46, 117.49, 123.4 (d, *J* = 3.4 Hz), 125.1, 125.2, 126.43, 126.45, 127.5 (d, *J* = 8.2 Hz), 133.9, 134.8, 141.8, 141.9, 159.5 (d, *J* = 246.4 Hz); HRMS (EI, m/z) calcd. For C<sub>16</sub>H<sub>21</sub>F [M]<sup>+</sup>: 232.1627; found: 232.1625.

#### 1-((1E,4E)-3,3,6-trimethylhepta-1,4-dien-1-yl)naphthalene(4v)

The same general procedure was followed. Column chromatography (Silica gel, eluting with hexane) afforded the desired product as white liquid (67.8 mg, 50% yield).

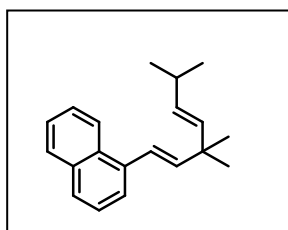

<sup>1</sup>H NMR (400 MHz, CDCl<sub>3</sub>): δ 1.05 (d, 6H, *J* = 6.7 Hz), 1.30 (s, 6H), 2.28-2.40 (m, 1H), 5.44-5.58 (m, 2H), 6.26 (d, 2H, *J* = 15.8 Hz), 7.07 (d, 2H, *J* = 15.8 Hz), 7.43-7.55 (m, 4H), 7.59 (d, 1H, *J* = 7.1 Hz), 7.76 (d, 1H, *J* = 8.2 Hz), 7.85 (dd, 1H, *J*<sub>1</sub> = 5.3 Hz, *J*<sub>2</sub> = 1.8 Hz), 8.13 (dd, 1H, *J*<sub>1</sub> = 6.9 Hz, *J*<sub>2</sub> = 1.3 Hz); <sup>13</sup>C NMR (100 MHz, CDCl<sub>3</sub>): δ 22.9, 27.9, 31.2, 38.9, 123.0, 123.6,

124.0, 125.72, 125.76, 125.8, 127.3, 128.5, 131.4, 133.7, 134.5, 135.7, 136.0, 143.5; HRMS (EI, m/z) calcd. For C<sub>20</sub>H<sub>24</sub> [M]<sup>+</sup>: 264.1878; found: 264.1880.

**(3E,6E)-2,5,5,8-tetramethylnona-3,6-diene (4w)**

The same general procedure was followed. Column chromatography (Silica gel, eluting with hexane) afforded the desired product as white liquid (40.8 mg, 45% yield).

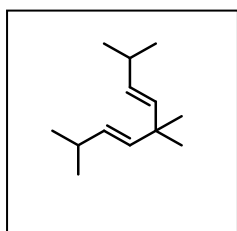

<sup>1</sup>H NMR (400 MHz, CDCl<sub>3</sub>): δ 0.95 (d, 12H, *J* = 6.7 Hz), 0.96 (s, 6H), 1.02 (s, 6H), 2.16-2.28 (m, 2H), 5.25 (dd, 2H, *J*<sub>1</sub> = 15.7 Hz, *J*<sub>2</sub> = 6.2 Hz), 5.33 (dd, 2H, *J*<sub>1</sub> = 15.7 Hz, *J*<sub>2</sub> = 0.6 Hz); <sup>13</sup>C NMR (100 MHz, CDCl<sub>3</sub>): δ 22.9, 27.9, 31.0, 37.5, 133.2, 136.5; HRMS (EI, m/z) calcd. For C<sub>13</sub>H<sub>24</sub> [M]<sup>+</sup>: 180.1878; found: 180.1876.

**(3E,6E)-2,5,5,9-tetramethyldeca-3,6-diene (4x)**

The same general procedure was followed. Column chromatography (Silica gel, eluting with hexane) afforded the desired product as a pale-yellow liquid (74.2 mg, 76% yield).

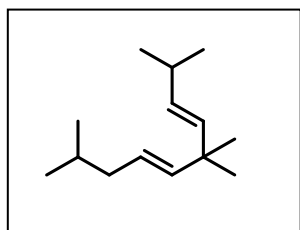

<sup>1</sup>H NMR (400 MHz, CDCl<sub>3</sub>): δ 0.86 (d, 6H, *J* = 6.4 Hz), 0.95 (d, 6H, *J* = 6.8 Hz), 1.04 (s, 6H), 1.53-1.63 (m, 1H), 1.87 (td, 2H, *J*<sub>1</sub> = 6.8 Hz, *J*<sub>2</sub> = 0.8 Hz), 2.17-2.28 (m, 1H), 5.24-5.30 (m, 1H), 5.32-5.33 (m, 1H), 5.36-5.40 (m, 1H); <sup>13</sup>C NMR (100 MHz, CDCl<sub>3</sub>): δ 22.3, 22.9, 27.9,

28.6, 31.1, 37.9, 42.1, 124.7, 133.3, 136.4, 140.8; HRMS (EI, m/z) calcd. For C<sub>14</sub>H<sub>26</sub> [M]<sup>+</sup>:194.2035; found: 194.2031.

**((1E,4E)-3,3,6-trimethylhepta-1,4-dien-1-yl)cyclopentane (4y)**

The same general procedure was followed. Column chromatography (Silica gel, eluting with hexane) afforded the desired product as a pale-yellow liquid (67.8 mg, 65% yield).

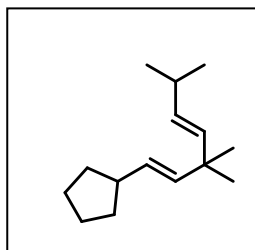

<sup>1</sup>H NMR (400 MHz, CDCl<sub>3</sub>): δ 0.95 (d, 6H, *J* = 6.7 Hz), 1.03 (s, 6H), 1.23-1.27 (m, 2H), 1.49-1.57 (m, 2H), 1.58-1.65 (m, 2H), 1.69-1.77 (m, 2H), 2.18-2.26 (m, 1H), 2.31-2.41 (m, 1H), 5.22-5.29 (m, 2H), 5.31-5.38 (m, 2H); <sup>13</sup>C NMR (100 MHz, CDCl<sub>3</sub>): δ 22.9, 25.2, 27.9, 31.1, 33.4, 37.6, 43.4, 130.7, 133.2, 136.5, 137.6; HRMS (EI, m/z) calcd. For C<sub>15</sub>H<sub>26</sub> [M]<sup>+</sup>:206.2035; found: 206.2034.

**1-fluoro-4-((1E,4E)-3,6,10-trimethyl-3-(4-methylpent-3-en-1-yl)undeca-1,4,9-trien-1-yl)benzene (4ya)**

The same general procedure was followed. Column chromatography (Silica gel, eluting with hexane) afforded the desired product as yellowish brown (138.2 mg, 75% yield).

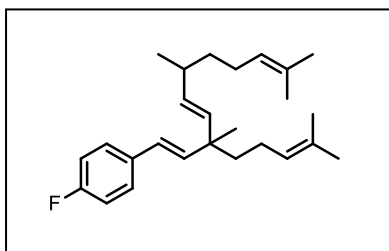

<sup>1</sup>H NMR (600 MHz, CDCl<sub>3</sub>): δ 1.03 (dd, 3H, *J*<sub>1</sub> = 6.7 Hz, *J*<sub>2</sub> = 2.7 Hz), 1.25 (s, 3H), 1.35 (quin, 2H, *J* = 6.2 Hz), 1.52 (t, 2H, *J* = 8.2 Hz), 1.62 (s, 6H), 1.75 (s, 3H), 2.00 (q, 4H, *J* = 7.0 Hz), 2.17 (quin, 1H, *J* = 6.9 Hz), 5.16 (t, 2H, *J* = 5.7 Hz), 5.27-5.31 (m, 1H), 5.46 (d, 1H, *J* = 15.7 Hz), 6.16 (d, 1H, *J* = 16.2 Hz), 6.30 (dd, 1H, *J*<sub>1</sub> = 16.2 Hz, *J*<sub>2</sub> = 2.5 Hz), 7.01 (t, 2H, *J* = 8.6 Hz), 7.33-7.36 (m, 2H); <sup>13</sup>C NMR (150 MHz, CDCl<sub>3</sub>): δ 17.1, 17.24, 17.25, 20.6, 20.7, 22.8,

22.9, 23.66, 23.67, 25.27, 114.8 (d,  $J = 21.3$  Hz), 124.3, 124.4, 125.0, 126.9 (d,  $J = 7.8$  Hz), 130.68, 130.69, 130.7, 133.5, 133.6, 133.7 (d,  $J = 3.3$  Hz), 135.35, 135.37, 138.30, 138.31, 138.32, 161.4 (d,  $J = 244.0$  Hz) ; HRMS (EI, m/z) calcd. For  $C_{26}H_{37}F$   $[M]^+$ : 368.2879; found: 368.2880.

**1-(trifluoromethyl)-3-((1E,4E)-3,6,10-trimethyl-3-(4-methylpent-3-en-1-yl)undeca-1,4,9-trien-1-yl)benzene (4yb)**

The same general procedure was followed. Column chromatography (Silica gel, eluting with hexane) afforded the desired product as pale brown (132 mg, 63% yield).

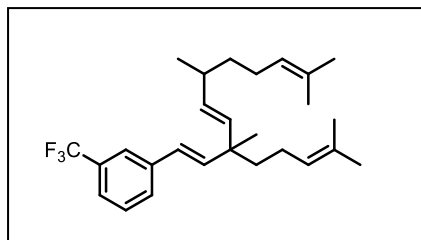

$^1H$  NMR (600 MHz,  $CDCl_3$ ):  $\delta$  1.02 (dd, 3H,  $J_1 = 6.7$  Hz,  $J_2 = 2.5$  Hz), 1.25 (s, 3H), 1.34 (quin, 2H,  $J = 6.5$  Hz), 1.53 (t, 2H,  $J = 8.3$  Hz), 1.61 (s, 6H), 1.70 (s, 3H), 1.99 (q, 4H,  $J = 7.8$  Hz), 2.16 (quin, 1H,  $J = 6.9$  Hz), 5.14 (t, 2H,  $J = 7.2$  Hz), 5.27-5.31 (m, 1H), 5.45 (d, 1H,  $J = 15.7$  Hz), 6.30 (d, 1H,  $J = 16.2$  Hz), 6.36 (dd, 1H,  $J_1 = 16.2$  Hz,  $J_2 = 2.2$  Hz), 7.42 (t, 1H,  $J = 7.6$  Hz), 7.46 (d, 1H,  $J = 7.7$  Hz), 7.54 (d, 1H,  $J = 7.5$  Hz), 7.61 (s, 1H);  $^{13}C$  NMR (150 MHz,  $CDCl_3$ ):  $\delta$  17.1, 17.2, 20.61, 20.67, 22.84, 22.87, 23.51, 23.53, 25.23, 25.23, 25.25, 25.50, 25.52, 36.29, 36.35, 36.8, 36.9, 41.1, 41.2, 41.36, 41.37, 122.28 (q,  $J = 3.7$  Hz), 122.86 (q,  $J = 3.7$  Hz), 124.28, 124.29, 124.3, 128.3, 127.7 (q,  $J = 275.8$  Hz), 130.2, 130.51 (q,  $J = 34.9$  Hz), 130.506, 130.73, 130.75, 133.8, 133.9, 134.93, 134.96, 138.3, 140.57, 140.59. HRMS (EI, m/z) calcd. For  $C_{27}H_{37}F_3$   $[M]^+$ : 418.2847; found: 418.2843.

**Methyl(3-((1E,4E)-3,6,10-trimethyl-3-(4-methylpent-3-en-1-yl)undeca-1,4,9-trien-1-yl)phenyl)sulfane(4yc)**

The same general procedure was followed. Column chromatography (Silica gel, eluting with hexane) afforded the desired product as a pale-yellow liquid (139.2 mg, 75% yield).

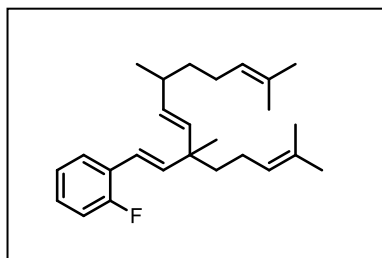

$^1\text{H}$  NMR (400 MHz,  $\text{CDCl}_3$ ):  $\delta$  0.98 (dd, 3H,  $J_1 = 6.7$  Hz,  $J_2 = 1.8$  Hz), 1.19 (s, 3H), 1.29-1.33 (m, 2H), 1.46-1.50 (m, 2H), 1.57 (s, 6H), 1.67 (s, 6H), 1.92-1.98 (m, 4H), 2.08-2.15 (m, 1H), 5.08-5.12 (m, 2H), 5.25 (ddd, 1H,  $J_1 = 15.7$  Hz,  $J_2 = 7.8$  Hz,  $J_3 = 2.1$  Hz), 5.42 (d, 1H,  $J = 15.7$  Hz), 6.26 (d, 1H,  $J = 16.4$  Hz), 6.46 (d, 1H,  $J = 16.3$  Hz), 6.99 (ddd, 1H,  $J_1 = 10.7$  Hz,  $J_2 = 8.1$  Hz,  $J_3 = 1.1$  Hz), 7.05 (dt, 1H,  $J_1 = 7.6$  Hz,  $J_2 = 1.2$  Hz), 7.12-7.17 (m, 1H), 7.44 (tt, 1H,  $J_1 = 7.7$  Hz,  $J_2 = 1.6$  Hz);  $^{13}\text{C}$  NMR (100 MHz,  $\text{CDCl}_3$ ):  $\delta$  17.6, 17.7, 21.1, 21.2, 23.40, 23.42, 25.7, 26.02, 26.04, 29.7, 36.81, 36.86, 37.4, 41.71, 41.76, 42.0, 115.6 (d,  $J = 22.1$  Hz), 119.0, 119.04, 124.0 (d,  $J = 3.1$  Hz), 124.8, 124.9, 125.8, 125.9, 126.9, 127.0, 127.9, 128.0 (d,  $J = 8.2$  Hz), 141.5, 160.0 (d, 1H,  $J = 246.4$  Hz); HRMS (EI,  $m/z$ ) calcd. For  $\text{C}_{26}\text{H}_{37}\text{F}$   $[\text{M}]^+$ : 368.2879; found: 368.2872.

**1-methyl-2-((1E,4E)-3,6,10-trimethyl-3-(4-methylpent-3-en-1-yl)undeca-1,4,9-trien-1-yl)benzene (4yd)**

The same general procedure was followed. Column chromatography (Silica gel, eluting with hexane) afforded the desired product as a pale-yellow liquid (115.6 mg, 63% yield).

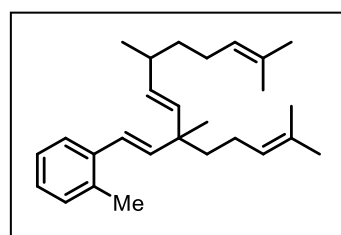

$^1\text{H}$  NMR (400 MHz,  $\text{CDCl}_3$ ):  $\delta$  1.03 (dd, 3H,  $J_1 = 6.7$  Hz,  $J_2 = 1.3$  Hz), 1.23 (s, 3H), 1.33-1.37 (m, 2H), 1.51-1.55 (m, 2H), 1.62 (s, 6H), 1.71 (s, 6H), 1.98-2.04 (m, 4H), 2.14-2.21 (m, 1H), 2.35 (s, 3H), 5.13-5.18 (m, 2H), 5.30 (dd, 1H,  $J_1 = 15.6$  Hz,  $J_2 = 7.8$  Hz), 5.48 (d, 1H,  $J = 15.8$  Hz), 6.10 (dd, 1H,  $J_1 = 16.0$  Hz,  $J_2 = 1.2$  Hz), 6.54 (d, 1H,  $J = 16.0$  Hz), 7.14-7.20 (m, 3H), 7.44 (d, 1H,  $J = 7.0$  Hz);  $^{13}\text{C}$  NMR (100 MHz,  $\text{CDCl}_3$ ):  $\delta$  17.73, 17.78, 19.9, 21.30, 21.33, 23.50, 23.53, 24.4, 24.5, 25.8, 26.1, 36.9, 37.5, 41.8, 42.0, 124.8, 124.9, 125.1, 125.6, 126.1,

126.8, 130.1, 131.2, 136.16, 136.18, 137.4, 140.5, 140.6; HRMS (EI, m/z) calcd. For C<sub>27</sub>H<sub>40</sub> [M]<sup>+</sup>:364.3130; found: 364.3136.

**((1E,4E)-3,6,10-trimethyl-3-(4-methylpent-3-en-1-yl)undeca-1,4,9-trien-1yl)cyclopentane (4ye)**

The same general procedure was followed. Column chromatography (Silica gel, eluting with hexane) afforded the desired product as a colourless liquid (101.8 mg, 59% yield).

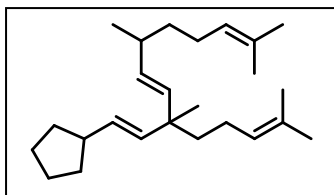

<sup>1</sup>H NMR (400 MHz, CDCl<sub>3</sub>): δ 0.96 (dd, 3H, *J*<sub>1</sub> = 6.7 Hz, *J*<sub>2</sub> = 0.6 Hz), 1.03 (s, 3H), 1.19-1.24 (m, 2H), 1.29-1.34 (m, 2H), 1.50-1.54 (m, 2H), 1.57 (d, 6H, *J* = 4.3 Hz), 1.60-1.64 (m, 2H), 1.67 (d, 6H, *J* = 3.4 Hz), 1.71-1.77 (m, 2H), 1.85-1.97 (m, 4H), 2.04-2.13 (m, 1H), 2.34-2.43 (m, 1H), 5.07-5.11 (m, 2H), 5.15 (t, 1H, *J* = 7.8 Hz), 5.27 (td, 1H, *J*<sub>1</sub> = 9.0 Hz, *J*<sub>2</sub> = 1.4 Hz), 5.34 (dd, 3H, *J*<sub>1</sub> = 15.7 Hz, *J*<sub>2</sub> = 10.2 Hz); <sup>13</sup>C NMR (100 MHz, CDCl<sub>3</sub>): δ 17.6, 17.74, 17.76, 21.2, 23.35, 23.37, 24.3, 24.4, 25.1, 25.77, 25.79, 26.0, 33.4, 36.74, 36.77, 37.5, 40.9, 41.9, 43.5, 125.0, 125.3, 130.8, 131.0, 131.8, 133.04, 133.07, 136.4, 136.5, 136.8; HRMS (EI, m/z) calcd. For C<sub>25</sub>H<sub>42</sub> [M]<sup>+</sup>:342.3287; found: 342.3282.

**1-methoxy-4-((1E,4E)-3-propylnona-1,4-dien-1-yl)benzene (4yf)**

The same general procedure was followed. Column chromatography (Silica gel, eluting with 98:2 hexane/EtOAc) afforded the desired product as a colourless liquid (92.6 mg, 68% yield).

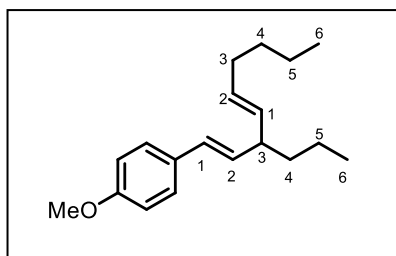

<sup>1</sup>H NMR (600 MHz, CDCl<sub>3</sub>): δ 0.93 (q, 6H, *J* = 5.3 Hz), 1.37 (q, 6H, *J* = 6.7 Hz), 1.46 (q, 2H, *J* = 8.3 Hz), 2.05 (q, 2H, *J* = 6.8 Hz), 2.82 (quin, 1H, *J* = 7.2 Hz), 3.82 (s, 3H), 5.39 (dd, 1H, *J*<sub>1</sub> = 15.3 Hz, *J*<sub>2</sub> = 7.3 Hz), 5.47 (dt, 1H, *J*<sub>1</sub> = 15.3 Hz, *J*<sub>2</sub> = 6.6 Hz), 6.00 (dd, 1H, *J*<sub>1</sub> = 15.9 Hz, *J*<sub>2</sub> = 7.6 Hz), 6.32 (d, 1H, *J* = 15.9 Hz), 6.86 (d, 2H, *J* = 8.6 Hz), 7.31 (d, 2H, *J* = 8.5 Hz); <sup>13</sup>C NMR (150 MHz, CDCl<sub>3</sub>): δ 13.5, 13.6, 19.9, 21.7, 31.3, 31.9, 37.1, 40.9, 45.3, 54.8, 113.4,

126.6, 127.6, 129.8, 130.2, 131.7, 132.5, 158.2; HRMS (EI, m/z) calcd. For C<sub>19</sub>H<sub>28</sub>O [M]<sup>+</sup>:272.2140; found: 272.2146.

**(3-((1E,4E)-3-ethylocta-1,4-dien-1-yl)phenyl)(methyl)sulfane (4yg)**

The same general procedure was followed. Column chromatography (Silica gel, eluting with 99:1 hexane/EtOAc) afforded the desired product as a colourless liquid (94.2 mg, 72% yield)

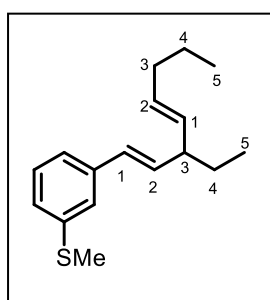

<sup>1</sup>H NMR (600 MHz, CDCl<sub>3</sub>): δ 0.92 (td, 6H, *J*<sub>1</sub> = 7.3 Hz, *J*<sub>2</sub> = 2.7 Hz), 1.38-1.44 (m, 2H), 1.49-1.52 (m, 2H), 2.02 (q, 2H, , *J* = 7.14 Hz), 2.50 (s, 3H), 2.72 (quin, 1H, *J* = 7.2Hz), 5.38 (dd, 1H, *J*<sub>1</sub> = 15.3 Hz, *J*<sub>2</sub> = 7.3 Hz), 5.47 (dt, 1H, *J*<sub>1</sub> = 15.3 Hz, *J*<sub>2</sub> = 6.6 Hz), 6.14 (dd, 1H, *J*<sub>1</sub> = 15.8 Hz, *J*<sub>2</sub> = 7.5 Hz), 6.32 (d, 1H, , *J* = 15.8 Hz), 7.11 (d, 1H, *J* = 7.5 Hz), 7.15 (d, 1H, *J* = 7.6 Hz), 7.23 (t, 1H, *J* = 7.7 Hz), 7.27 (d, 1H, *J* = 3.4 Hz); <sup>13</sup>C NMR (150 MHz, CDCl<sub>3</sub>): δ 11.3, 13.2, 15.4, 22.2, 27.7, 34.3, 47.3, 122.5, 123.8, 124.6, 128.0, 128.4, 130.2, 132.1, 134.4, 138.00, 138.04; HRMS (EI, m/z) calcd. For C<sub>17</sub>H<sub>24</sub>S [M]<sup>+</sup>:260.1599; found: 260.1601.

**((1E,4E)-3-(4-methoxyphenyl)hexa-1,4-diene-1,6-diyl)dibenzene (5a)**

The same general procedure was followed. Column chromatography (Silica gel, eluting with 98:2 hexane/EtOAc) afforded the desired product as a light brown liquid (140.0 mg, 82% yield).

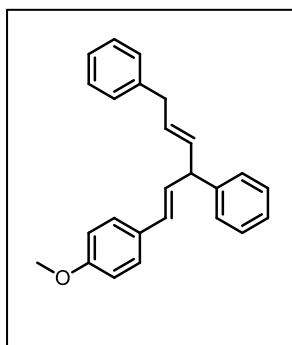

$^1\text{H}$  NMR (400 MHz,  $\text{CDCl}_3$ ):  $\delta$  3.43 (d, 2H,  $J = 6.4$  Hz), 3.80 (s, 3H), 4.21 (t, 1H,  $J = 6.7$  Hz), 5.68-5.75 (m, 1H), 5.79-5.85 (m, 1H), 6.26 (dd, 1H,  $J_1 = 15.8$  Hz,  $J_2 = 6.8$  Hz), 6.37 (d, 1H,  $J = 15.9$  Hz), 6.84 (dd, 2H,  $J_1 = 6.7$  Hz,  $J_2 = 2.1$  Hz), 7.20-7.23 (m, 3H), 7.24 (t, 1H,  $J_2 = 2.0$  Hz), 7.27 (t, 1H,  $J_2 = 1.4$  Hz), 7.29 (s, 3H), 7.30-7.32 (m, 3H), 7.33-7.35 (m, 1H);  $^{13}\text{C}$  NMR (100 MHz,  $\text{CDCl}_3$ ):  $\delta$  37.9, 50.2, 54.1, 112.7, 124.8, 125.2, 126.2, 126.8, 127.2, 127.3, 127.4, 128.5, 128.9, 129.10, 129.13, 132.4, 139.4, 142.3, 157.8; HRMS (EI,  $m/z$ ) calcd. For  $\text{C}_{25}\text{H}_{24}\text{O}$   $[\text{M}]^+$ : 340.1827; found: 340.1823.

#### 4-((1E,4E)-1,6-diphenylhexa-1,4-dien-3-yl)-1,1'-biphenyl (5b)

The same general procedure was followed. Column chromatography (Silica gel, eluting with hexane) afforded the desired product as a colourless liquid (155.4 mg, 80% yield).

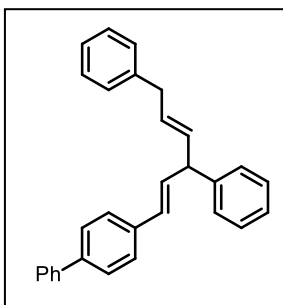

$^1\text{H}$  NMR (400 MHz,  $\text{CDCl}_3$ ):  $\delta$  3.55 (d, 2H,  $J = 6.5$  Hz), 4.36 (t, 1H,  $J = 3.1$  Hz), 5.82-5.89 (m, 1H), 5.92-5.98 (m, 1H), 6.57-6.58 (m, 2H), 7.31-7.32 (m, 1H), 7.33-7.37 (m, 3H), 7.40-7.41 (m, 1H), 7.41-7.43 (m, 4H), 7.44-7.47 (m, 2H), 7.50-7.55 (m, 5H), 7.65 (dd, 2H,  $J_1 = 6.4$  Hz,  $J_2 = 1.9$  Hz), 7.68-7.69 (m, 1H), 7.70-7.71 (m, 1H);  $^{13}\text{C}$  NMR (150 MHz,  $\text{CDCl}_3$ ):  $\delta$  39.0, 51.3, 126.0, 126.4, 126.6, 126.8, 127.1, 127.2, 128.0, 128.4, 128.54, 128.55, 128.7, 129.8, 130.3, 132.5, 133.2, 136.4, 139.9, 140.4, 140.7, 143.1; HRMS (EI,  $m/z$ ) calcd. For  $\text{C}_{30}\text{H}_{26}$   $[\text{M}]^+$ : 340.2035; found: 340.2041.

#### ((1E,4E)-3-(4-(tert-butyl)phenyl)hexa-1,4-diene-1,6-diyl)dibenzene (5c)



The same general procedure was followed. Column chromatography (Silica gel, eluting with hexane) afforded the desired product as a colourless liquid (150.2 mg, 82% yield).

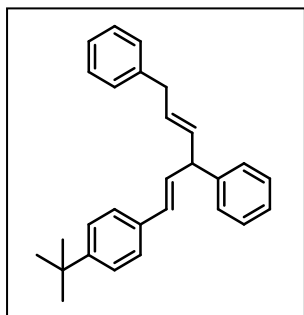

$^1\text{H}$  NMR (400 MHz,  $\text{CDCl}_3$ ):  $\delta$  1.19 (s, 9H), 3.30 (d, 2H,  $J = 6.4$  Hz), 4.10 (t, 1H,  $J = 6.2$  Hz), 5.56-5.64 (m, 1H), 5.67-5.72 (m, 1H), 6.22-6.32 (m, 2H), 7.04-7.09 (m, 4H), 7.11 (t, 1H,  $J = 1.7$  Hz) 7.14-7.18 (m, 6H), 7.19 (s, 3H);  $^{13}\text{C}$  NMR (100 MHz,  $\text{CDCl}_3$ ):  $\delta$  31.5, 34.7, 39.2, 51.5, 125.6, 126.1, 126.2, 126.5, 128.2, 128.6, 128.71, 128.77, 130.2, 130.4, 131.8, 133.6, 134.8, 140.7, 143.5, 150.4; HRMS (EI,  $m/z$ ) calcd. For  $\text{C}_{28}\text{H}_{30}$   $[\text{M}]^+$ : 366.2348; found: 366.2354.

**((2E,5E)-6-(p-tolyl)hexa-2,5-diene-1,4-diyl)dibenzene (5d)**

The same general procedure was followed. Column chromatography (Silica gel, eluting with hexane) afforded the desired product as a colorless liquid (117.2 mg, 72% yield).

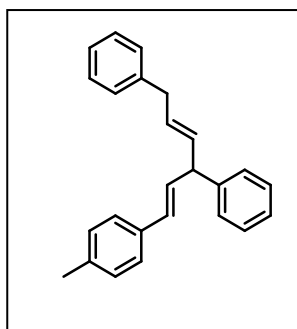

$^1\text{H}$  NMR (400 MHz,  $\text{CDCl}_3$ ):  $\delta$  2.38 (s, 3H), 3.48 (d, 2H,  $J = 6.4$  Hz), 4.27 (t, 1H,  $J = 6.2$  Hz), 5.74-5.81 (m, 1H), 5.85-5.90 (m, 1H), 6.38-6.48 (m, 2H), 7.16 (d, 2H,  $J = 7.8$  Hz), 7.24-7.28 (m, 4H), 7.29-7.31 (m, 1H), 7.33-7.40 (m, 7H);  $^{13}\text{C}$  NMR (100 MHz,  $\text{CDCl}_3$ ): 21.3, 39.2, 51.5, 126.1, 126.3, 126.5, 128.2, 128.5, 128.6, 128.7, 129.3, 130.3, 131.5, 133.6, 134.7, 137.0, 140.7, 143.5; HRMS (EI,  $m/z$ ) calcd. For  $\text{C}_{25}\text{H}_{24}$   $[\text{M}]^+$ : 324.1878; found: 324.1874.

**(4-((1E,4E)-3,6-diphenylhexa-1,4-dien-1-yl)phenoxy)triisopropylsilane (5e)**

The same general procedure was followed. Column chromatography (Silica gel, eluting with hexane) afforded the desired product as a pale white liquid (136.4 mg, 56% yield).

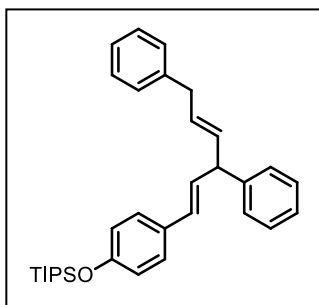

$^1\text{H}$  NMR (400 MHz,  $\text{CDCl}_3$ ):  $\delta$  1.20-1.23 (m, 18H), 1.32-1.41(m, 3H), 3.53 (d, 2H,  $J = 5.9$  Hz), 4.31 (t, 1H,  $J = 6.3$  Hz), 5.79-5.86 (m, 1H), 5.88-5.95 (m, 1H), 6.32-6.39 (m, 1H), 6.46 (dd, 1H,  $J_1 = 15.9$  Hz,  $J_2 = 4.1$  Hz), 6.92-6.94 (m, 2H), 7.30-7.35 (m, 6H), 7.38-7.45 (m, 6H);  $^{13}\text{C}$  NMR (100 MHz,  $\text{CDCl}_3$ ): 12.9, 18.1, 39.2, 51.6, 120.1, 126.2, 126.5, 127.5, 128.2, 128.6, 128.7, 128.8, 130.0, 130.3, 130.4, 130.6, 133.7, 140.7, 143.6, 155.6; HRMS (EI,  $m/z$ ) calcd. For  $\text{C}_{33}\text{H}_{42}\text{OSi}$   $[\text{M}]^+$ : 482.3005; found: 482.2998.

**((1E,4E)-3-(4-fluorophenyl)hexa-1,4-diene-1,6-diyl)dibenzene (5f)**

The same general procedure was followed. Column chromatography (Silica gel, eluting with hexane) afforded the desired product as a colourless liquid (159.4 mg, 97% yield).

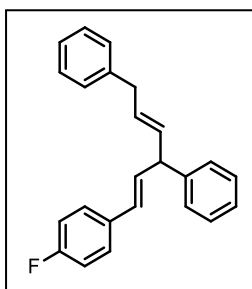

$^1\text{H}$  NMR (400 MHz,  $\text{CDCl}_3$ ):  $\delta$  3.52 (d, 2H,  $J = 6.4$  Hz), 4.30 (t, 1H,  $J = 6.4$  Hz), 5.77-5.85 (m, 1H), 5.88-5.93 (m, 1H), 6.40 (dd, 1H,  $J_1 = 15.8$  Hz,  $J_2 = 6.3$  Hz), 6.47 (d, 1H,  $J = 15.9$  Hz), 7.04 (dd, 1H,  $J_1 = 6.6$  Hz,  $J_2 = 2.1$  Hz), 7.07 (dd, 1H,  $J_1 = 6.8$  Hz,  $J_2 = 1.8$  Hz), 7.27-7.30 (m, 3H), 7.32-7.34 (m, 1H), 7.35-7.39 (m, 5H), 7.40-7.44 (m, 3H);  $^{13}\text{C}$  NMR (100 MHz,  $\text{CDCl}_3$ ):  $\delta$  39.1, 51.3, 115.4 (d,  $J = 21.3$  Hz), 126.1, 126.5, 127.7 (d,  $J = 7.9$  Hz), 128.0, 128.5, 128.6, 129.2, 130.4, 132.2, 133.2, 133.6 (d,  $J = 2.8$  Hz), 140.5, 143.2, 162.1 (d,  $J = 245.1$  Hz); HRMS (EI,  $m/z$ ) calcd. For  $\text{C}_{24}\text{H}_{21}\text{F}$   $[\text{M}]^+$ : 328.1627; found: 328.1628.

**((1E,4E)-3-(4-bromophenyl)hexa-1,4-diene-1,6-diyl)dibenzene (5g)**

The same general procedure was followed. Column chromatography (Silica gel, eluting with hexane) afforded the desired product as a brown liquid (155.9 mg, 80% yield).

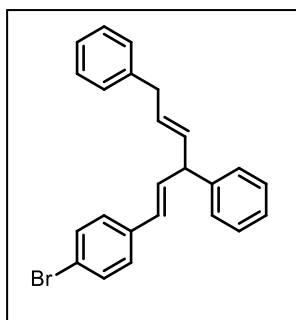

$^1\text{H}$  NMR (400 MHz,  $\text{CDCl}_3$ ):  $\delta$  3.47 (d, 2H,  $J = 6.3$  Hz), 4.25 (t, 1H,  $J = 6.3$  Hz), 5.72-5.80 (m, 1H), 5.82-5.88 (m, 1H), 6.35-6.47 (m, 2H), 7.23-7.40 (m, 13H), 7.42-7.46 (m, 2H);  $^{13}\text{C}$  NMR (100 MHz,  $\text{CDCl}_3$ ):  $\delta$  39.1, 51.4, 121.0, 126.2, 126.7, 127.9, 128.1, 128.5, 128.7, 128.8, 129.3, 130.6, 131.7, 133.1, 133.4, 136.4, 140.5, 143.0; HRMS (EI,  $m/z$ ) calcd. For  $\text{C}_{24}\text{H}_{21}\text{Br}$   $[\text{M}]^+$ : 388.0827; found: 388.0827.

**((1E,4E)-3-(4-chlorophenyl)hexa-1,4-diene-1,6-diyl)dibenzene(5h)**

The same general procedure was followed. Column chromatography (Silica gel, eluting with hexane) afforded the desired product as a colourless liquid (124.2 mg, 72% yield).

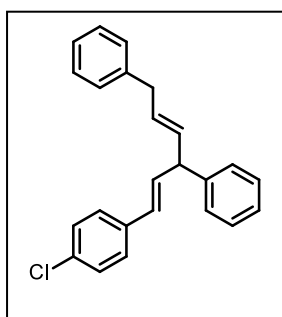

$^1\text{H}$  NMR (600 MHz,  $\text{CDCl}_3$ ):  $\delta$  3.52 (d, 2H,  $J = 6.3$  Hz), 4.30 (t, 1H,  $J = 5.5$  Hz), 5.77-5.84 (m, 1H), 5.87-5.93 (m, 1H), 6.41-6.50 (m, 2H), 7.28-7.30 (m, 3H), 7.32-7.34 (m, 5H), 7.36 (m, 2H), 7.38-7.44 (m, 4H);  $^{13}\text{C}$  NMR (150 MHz,  $\text{CDCl}_3$ ):  $\delta$  39.2, 51.5, 126.2, 126.7, 127.6, 128.2, 128.6, 128.7, 128.8, 129.3, 130.7, 132.9, 133.2, 133.3, 136.0, 140.6, 143.1; HRMS (EI,  $m/z$ ) calcd. For  $\text{C}_{24}\text{H}_{21}\text{Cl}$   $[\text{M}]^+$ : 344.1332; found: 344.1316.

**((1E,4E)-3-(4-iodophenyl)hexa-1,4-diene-1,6-diyl)dibenzene (5i)**

The same general procedure was followed. Column chromatography (Silica gel, eluting with hexane) afforded the desired product as a colourless liquid (179.6 mg, 82% yield).

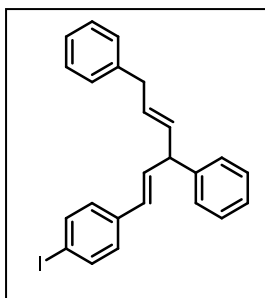

$^1\text{H}$  NMR (400 MHz,  $\text{CDCl}_3$ ):  $\delta$  3.46 (d, 2H,  $J = 6.3$  Hz), 4.24 (t, 1H,  $J = 6.5$  Hz), 5.71-5.78 (m, 1H), 5.81-5.86 (m, 1H), 6.35 (d, 1H,  $J = 16$  Hz), 6.41-6.47 (m, 1H), 7.11 (d, 2H,  $J = 8.4$  Hz), 7.22-7.25 (m, 3H), 7.27-7.39 (m, 8H), 7.63 (d, 2H,  $J = 8.0$  Hz);  $^{13}\text{C}$  NMR (100 MHz,  $\text{CDCl}_3$ ):  $\delta$  39.1, 51.4, 92.4, 126.2, 126.7, 128.1, 128.2, 128.6, 128.7, 128.8, 129.4, 130.7, 133.1, 133.5, 137.0, 137.6, 140.5, 143.0; HRMS (EI,  $m/z$ ) calcd. For  $\text{C}_{24}\text{H}_{21}\text{I}$   $[\text{M}]^+$ : 436.0688; found: 436.0682.

**((1E,4E)-hexa-1,4-diene-1,3,6-triyl)tribenzene (5j)**

The same general procedure was followed. Column chromatography (Silica gel, eluting with hexane) afforded the desired product as a white liquid (123.0 mg, 79% yield).

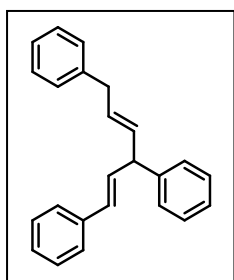

$^1\text{H}$  NMR (400 MHz,  $\text{CDCl}_3$ ):  $\delta$  3.49 (t, 2H,  $J = 6.0$  Hz), 4.29-4.30 (m, 1H), 5.76-5.93 (m, 2H), 5.76-5.93 (m, 2H), 6.47-6.50 (m, 2H), 7.24-7.30 (m, 5H), 7.34-7.45 (m, 10H);  $^{13}\text{C}$  NMR (100 MHz,  $\text{CDCl}_3$ ):  $\delta$  39.2, 51.6, 126.2, 126.4, 126.6, 127.4, 128.2, 128.6, 128.7, 128.8, 130.5, 132.6, 133.5, 137.6, 140.7, 143.4; HRMS (EI,  $m/z$ ) calcd. For  $\text{C}_{24}\text{H}_{22}$   $[\text{M}]^+$ : 310.1722; found: 310.1728.

**((1E,4E)-3-(3-(trifluoromethyl)phenyl)hexa-1,4-diene-1,6-diyl)dibenzene (5k)**

The same general procedure was followed. Column chromatography (Silica gel, eluting with 99:1 hexane/EtOAc) afforded the desired product as a colourless liquid (122.8 mg, 65% yield).

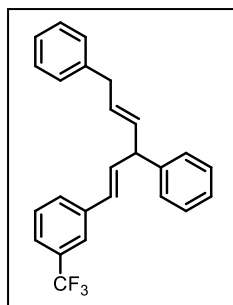

$^1\text{H}$  NMR (400 MHz,  $\text{CDCl}_3$ ):  $\delta$  3.52 (d, 2H,  $J = 6.2$  Hz), 4.32 (t, 1H,  $J = 6.3$  Hz), 5.78-5.85 (m, 1H), 5.88-5.93 (m, 1H), 6.48-6.60 (m, 2H), 7.26-7.33 (m, 4H), 7.34-7.38 (m, 4H), 7.39-7.41 (m, 1H), 7.42-7.46 (m, 2H), 7.52 (d, 1H,  $J = 7.7$  Hz), 7.57 (d, 1H,  $J = 7.6$  Hz), 7.67 (s, 1H);  $^{13}\text{C}$  NMR (100 MHz,  $\text{CDCl}_3$ ):  $\delta$  39.2, 51.5, 123.0 (q,  $J = 3.2$  Hz), 123.8 (q,  $J = 3.7$  Hz), 126.2, 126.8, 127.0 (q,  $J = 271$  Hz), 128.1, 128.6, 128.7, 128.8, 129.0, 129.2, 129.5, 130.9, 131.0 (q,  $J = 31.5$  Hz), 133.0, 134.6, 138.3, 140.5, 142.9; HRMS (EI, m/z) calcd. For  $\text{C}_{25}\text{H}_{21}\text{F}_3$   $[\text{M}]^+$ : 378.1595; found: 378.1596

### **(3-((1E,4E)-3,6-diphenylhexa-1,4-dien-1-yl)phenyl)(methyl)sulfane (5l)**

The same general procedure was followed. Column chromatography (Silica gel, eluting with hexane) afforded the desired product as a colourless liquid (122.8 mg, 65% yield).

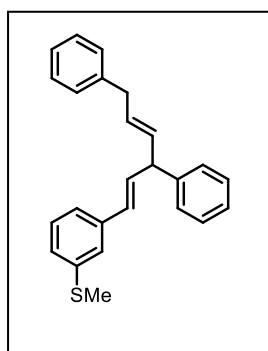

$^1\text{H}$  NMR (400 MHz,  $\text{CDCl}_3$ ):  $\delta$  2.47 (s, 3H), 3.43 (d, 2H,  $J = 6.4$  Hz), 4.22 (t, 1H,  $J = 6.0$  Hz), 5.68-5.75 (m, 1H), 5.78-5.84 (m, 1H), 6.34-6.44 (m, 2H), 7.09-7.14 (m, 2H), 7.19-7.23 (m, 4H), 7.25-7.28 (m, 4H), 7.29-7.35 (m, 4H);  $^{13}\text{C}$  NMR (100 MHz,  $\text{CDCl}_3$ ):  $\delta$  16.0, 39.1, 51.4, 123.2, 124.6, 125.5, 126.1, 126.5, 128.1, 128.5, 128.6, 129.0, 129.9, 130.5, 133.2, 138.1, 138.7, 140.5, 143.1; HRMS (EI, m/z) calcd. For  $\text{C}_{25}\text{H}_{24}\text{S}$   $[\text{M}]^+$ : 356.1599; found: 356.1595.

### **((2E,5E)-6-(3-methoxyphenyl)hexa-2,5-diene-1,4-diyl)dibenzene (5m)**

The same general procedure was followed. Column chromatography (Silica gel, eluting with 98:2 hexane/EtOAc) afforded the desired product as a yellowish-brown liquid (136.2 mg, 80% yield).

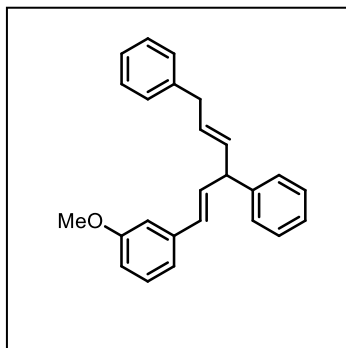

$^1\text{H}$  NMR (400 MHz,  $\text{CDCl}_3$ )  $\delta$  3.45 (d, 2H,  $J = 6.3$  Hz), 3.82 (s, 3H), 4.25 (t, 1H,  $J = 3.9$  Hz), 5.70-5.78 (m, 1H), 5.81-5.87 (m, 1H), 6.41-6.43 (m, 2H), 6.78-6.80 (m, 1H), 6.93 (s, 1H), 6.97-6.99 (m, 1H), 7.21-7.25 (m, 5H), 7.28-7.32 (m, 4H), 7.34-7.38 (m, 3H);  $^{13}\text{C}$  NMR (100 MHz,  $\text{CDCl}_3$ ): 39.1, 51.4, 55.3, 111.6, 113.0, 119.0, 126.1, 126.5, 128.1, 128.5, 128.67, 128.69, 129.5, 130.3, 130.5, 132.8, 133.3, 138.9, 140.6, 143.2, 159.9; HRMS (EI,  $m/z$ ) calcd. For  $\text{C}_{25}\text{H}_{24}\text{O}$   $[\text{M}]^+$ : 340.1827; found: 340.1825.

**((1E,4E)-3-(4-bromophenyl)hexa-1,4-diene-1,6-diyl)dibenzene (5n)**

The same general procedure was followed. Column chromatography (Silica gel, eluting with hexane) afforded the desired product as a light brown liquid (160.2 mg, 82% yield).

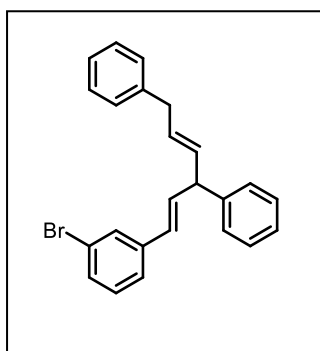

$^1\text{H}$  NMR (400 MHz,  $\text{CDCl}_3$ ):  $\delta$  3.48 (d, 2H,  $J = 6.2$  Hz), 4.27 (t, 1H,  $J = 6.5$  Hz), 5.73-5.80 (m, 1H), 5.85 (dd, 1H,  $J_1 = 15.3$  Hz,  $J_2 = 6.5$  Hz), 6.38 (d, 1H,  $J = 16.0$  Hz), 6.43-6.49 (m, 1H), 7.16-7.20 (m, 1H), 7.25-7.29 (m, 4H), 7.30-7.33 (m, 3H), 7.35-7.41 (m, 5H), 7.56 (t, 1H,  $J = 1.7$  Hz);  $^{13}\text{C}$  NMR (100 MHz,  $\text{CDCl}_3$ ):  $\delta$  39.2, 51.4, 122.8, 125.1, 126.2, 126.7, 128.1, 128.6,

128.7, 128.8, 129.1, 129.2, 130.1, 130.2, 130.7, 133.0, 134.2, 139.7, 140.5, 142.9; HRMS (EI, m/z) calcd. For C<sub>24</sub>H<sub>21</sub>Br [M]<sup>+</sup>: 388.0827; found: 388.0821.

**((1E,4E)-3-(3,5-dimethoxyphenyl)hexa-1,4-diene-1,6-diyl)dibenzene (5o)**

The same general procedure was followed. Column chromatography (Silica gel, eluting with 98:2 hexane/EtOAc) afforded the desired product as a colourless liquid (133.2 mg, 72% yield).

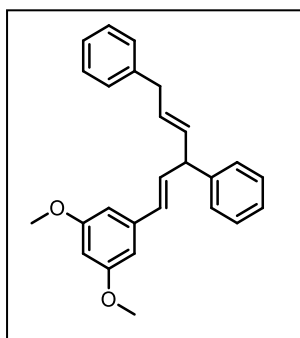

<sup>1</sup>H NMR (600 MHz, CDCl<sub>3</sub>): δ 3.30 (d, 2H, *J* = 5.9 Hz), 3.63 (t, 6H, *J* = 4.6 Hz), 4.09 (t, 1H, *J* = 6.2 Hz), 5.56-5.62 (m, 1H), 5.66-5.71 (m, 1H), 6.22-6.31 (m, 3H), 6.41 (q, 2H, *J* = 2.2 Hz), 7.07-7.11 (m, 4H), 7.14-7.21 (m, 6H); <sup>13</sup>C NMR (150 MHz, CDCl<sub>3</sub>): δ 39.1, 51.3, 55.3, 99.6, 104.3, 126.1, 126.5, 128.1, 128.4, 128.6, 130.4, 130.5, 132.9, 133.2, 139.4, 140.5, 143.1, 160.9; HRMS (ESI, m/z) calcd. For C<sub>26</sub>H<sub>26</sub>O<sub>2</sub> [M]<sup>+</sup>: 370.1933; found: 370.1939.

**((1E,4E)-3-(4-chlorophenyl)hexa-1,4-diene-1,6-diyl)dibenzene (5p)**

The same general procedure was followed. Column chromatography (Silica gel, eluting with hexane) afforded the desired product as a pale-yellow liquid (120.8 mg, 63% yield).

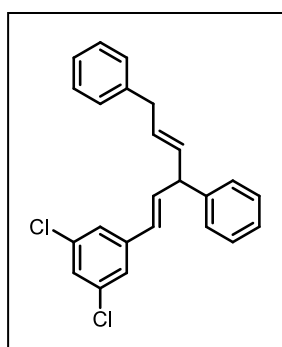

<sup>1</sup>H NMR (600 MHz, CDCl<sub>3</sub>): δ 3.50 (d, 2H, *J* = 6.4 Hz), 4.28 (t, 1H, *J* = 6.8 Hz), 5.77-5.81 (m, 1H), 5.86 (dd, 1H, *J*<sub>1</sub> = 15.4 Hz, *J*<sub>2</sub> = 6.4 Hz), 6.33 (d, 1H, *J* = 15.7 Hz), 6.49 (dd, 1H, *J*<sub>1</sub> = 15.8 Hz, *J*<sub>2</sub> = 7.0 Hz), 7.24-7.33 (m, 9H), 7.40 (dt, 4H, *J*<sub>1</sub> = 21.8 Hz, *J*<sub>2</sub> = 7.6 Hz), <sup>13</sup>C NMR (150 MHz, CDCl<sub>3</sub>): δ 39.1, 51.3, 124.6, 126.1, 126.7, 126.9, 128.0, 128.05, 128.54, 128.55, 128.6,

128.7, 130.9, 132.6, 135.0, 135.6, 140.3, 140.4, 142.4; HRMS (EI, m/z) calcd. For C<sub>24</sub>H<sub>20</sub>Cl<sub>2</sub> [M]<sup>+</sup>: 378.0942; found: 378.0936.

### 2-((1E,4E)-3,6-diphenylhexa-1,4-dien-1-yl)naphthalene (5q)

The same general procedure was followed. Column chromatography (Silica gel, eluting with hexane) afforded the desired product as a colourless liquid (135.2 mg, 75% yield).

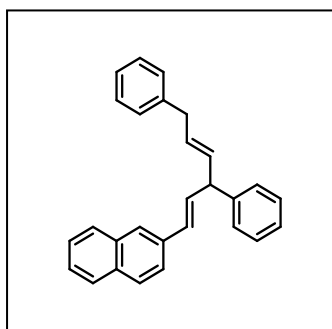

<sup>1</sup>H NMR (400 MHz, CDCl<sub>3</sub>): δ 3.52 (d, 2H, *J* = 6.4 Hz), 4.35 (t, 1H, *J* = 6.0 Hz), 5.79-5.87 (m, 1H), 5.90-5.96 (m, 1H), 6.60 (dd, 1H, *J*<sub>1</sub> = 16.0 Hz, *J*<sub>2</sub> = 6.0 Hz), 6.66 (d, 1H, *J* = 16.0 Hz), 7.26-7.34 (m, 4H), 7.36-7.42 (m, 6H), 7.47-7.52 (m, 2H), 7.65 (dd, 1H, *J*<sub>1</sub> = 8.8 Hz, *J*<sub>2</sub> = 1.6 Hz), 7.76 (s, 1H), 7.82 (t, 3H, *J* = 9.2 Hz); <sup>13</sup>C NMR (150 MHz, CDCl<sub>3</sub>): 39.2, 51.6, 123.8, 125.8, 126.1, 126.2, 126.3, 126.6, 127.8, 128.0, 128.2, 128.6, 128.7, 130.5, 130.6, 133.01, 133.04, 133.4, 133.8, 135.0, 140.7, 143.3; HRMS (EI, m/z) calcd. For C<sub>28</sub>H<sub>24</sub> [M]<sup>+</sup>: 360.1878; found: 360.1885.

### ((2E,5E)-6-(o-tolyl)hexa-2,5-diene-1,4-diyl)dibenzene (5r)

The same general procedure was followed. Column chromatography (Silica gel, eluting with hexane) afforded the desired product as a colorless liquid (117.2 mg, 72% yield).

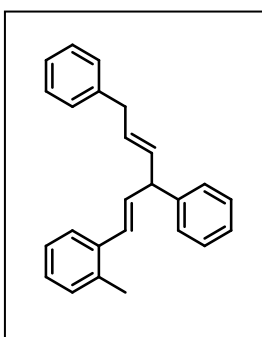

<sup>1</sup>H NMR (400 MHz, CDCl<sub>3</sub>): δ 2.37 (s, 3H), 3.49 (d, 2H, *J* = 6.2 Hz), 4.31 (t, 1H, *J* = 6.4 Hz), 5.75-5.83 (m, 1H), 5.85-5.91 (m, 1H), 6.31-6.38 (m, 1H), 6.70 (d, 1H, *J* = 15.7 Hz), 7.18-7.19 (m, 3H), 7.26-7.31 (m, 4H), 7.33-7.41 (m, 6H), 7.48-7.50 (m, 1H); <sup>13</sup>C NMR (100 MHz,



CDCl<sub>3</sub>): 19.9, 39.2, 51.7, 125.7, 126.1, 126.5, 127.2, 128.1, 128.3, 128.5, 128.6, 128.7, 130.3, 130.4, 133.6, 133.8, 135.3, 136.6, 140.7, 143.4; HRMS (EI, m/z) calcd. For C<sub>25</sub>H<sub>24</sub> [M]<sup>+</sup>: 324.1878; found: 324.1872.

**((1E,4E)-3-(2-bromophenyl)hexa-1,4-diene-1,6-diyl)dibenzene (5s)**

The same general procedure was followed. Column chromatography (Silica gel, eluting with hexane) afforded the desired product as a brown liquid (110.2 mg, 56% yield).

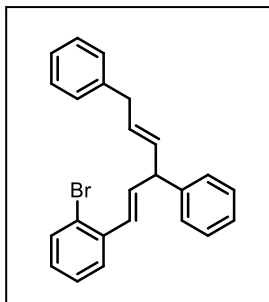

<sup>1</sup>H NMR (400 MHz, CDCl<sub>3</sub>): δ 3.48 (d, 2H, *J* = 6.3 Hz), 4.32 (t, 1H, *J* = 6.7 Hz), 5.74-5.82 (m, 1H), 5.84-5.90 (m, 1H), 6.39 (ddd, 1H, *J*<sub>1</sub> = 15.8 Hz, *J*<sub>2</sub> = 6.9 Hz, *J*<sub>3</sub> = 1.2 Hz), 6.87 (d, 1H, *J* = 15.8 Hz), 7.07-7.11 (m, 1H), 7.22-7.30 (m, 6H), 7.32-7.34 (m, 3H), 7.36-7.41 (m, 3H), 7.54 (dd, 1H, *J*<sub>1</sub> = 7.7 Hz, *J*<sub>2</sub> = 1.4 Hz), 7.57 (dt, 1H, *J*<sub>1</sub> = 8.0 Hz, *J*<sub>2</sub> = 1.1 Hz); <sup>13</sup>C NMR (100 MHz, CDCl<sub>3</sub>): δ 39.2, 51.5, 123.7, 126.2, 126.7, 127.1, 127.5, 128.1, 128.5, 128.6, 128.76, 128.78, 129.4, 130.8, 133.0, 133.1, 135.5, 137.4, 140.5, 143.0; HRMS (EI, m/z) calcd. For C<sub>24</sub>H<sub>21</sub>Br [M]<sup>+</sup>: 388.0827; found: 388.0820

**1-((1E,4E)-3,6-diphenylhexa-1,4-dien-1-yl)naphthalene (KVL-5t)**

The same general procedure was followed. Column chromatography (Silica gel, eluting with hexane) afforded the desired product as a colourless liquid (117.0 mg, 65% yield).

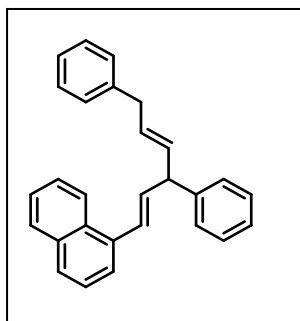

<sup>1</sup>H NMR (400 MHz, CDCl<sub>3</sub>): δ 3.51 (d, 2H, *J* = 6.4 Hz), 4.41 (t, 1H, *J* = 6.6 Hz), 5.81-5.88 (m, 1H), 5.94 (dd, 1H, *J*<sub>1</sub> = 15.6 Hz, *J*<sub>2</sub> = 6.6 Hz), 6.49 (dd, 1H, *J*<sub>1</sub> = 15.6 Hz, *J*<sub>2</sub> = 6.8 Hz), 7.20-7.31 (m, 5H), 7.35 (d, 1H, *J* = 7.2 Hz), 7.38-7.44 (m, 5H), 7.47 (d, 1H, *J* = 7.8 Hz), 7.53 (t, 2H,

$J = 3.5$  Hz), 7.63 (d, 1H,  $J = 7.1$  Hz), 7.79 (d, 1H,  $J = 8.1$  Hz), 7.88 (d, 1H,  $J = 8.2$  Hz), 8.10 (d, 1H,  $J = 7.5$  Hz);  $^{13}\text{C}$  NMR (100 MHz,  $\text{CDCl}_3$ ):  $\delta$  39.2, 51.8, 123.8, 124.0, 125.7, 125.8, 126.0, 126.2, 126.6, 127.7, 128.2, 128.6, 128.7, 130.6, 131.3, 133.5, 133.7, 135.3, 135.8, 140.7, 143.3; HRMS (EI,  $m/z$ ) calcd. For  $\text{C}_{28}\text{H}_{24}$   $[\text{M}]^+$ : 360.1878; found: 360.1879.

#### **((2E,5E)-7-methylocta-2,5-diene-1,4-diyl)dibenzene (5u)**

The same general procedure was followed. Column chromatography (Silica gel, eluting with hexane) afforded the desired product as a light brown liquid (69.2 mg, 50% yield).

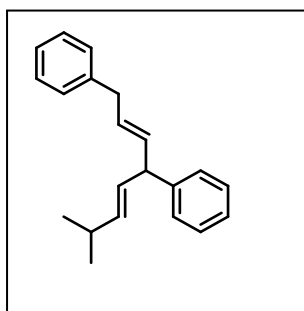

$^1\text{H}$  NMR (400 MHz,  $\text{CDCl}_3$ ):  $\delta$  1.00 (d, 3H,  $J = 3.5$  Hz), 1.02 (d, 3H,  $J = 3.5$  Hz), 2.26-2.38 (m, 1H), 3.41 (d, 2H,  $J = 6.5$  Hz), 4.01 (t, 2H,  $J = 6.7$  Hz), 5.45-5.51 (m, 1H), 5.56-5.60 (m, 1H), 5.61-5.67 (m, 1H), 5.71-5.77 (m, 1H), 7.19-7.23 (m, 5H), 7.24 (d, 1H,  $J = 1.6$  Hz), 7.28-7.34 (m, 4H);  $^{13}\text{C}$  NMR (100 MHz,  $\text{CDCl}_3$ ):  $\delta$  22.6, 31.1, 39.1, 51.0, 126.0, 126.2, 128.0, 128.4, 128.6, 129.2, 134.4, 138.5, 140.8, 144.1; HRMS (EI,  $m/z$ ) calcd. For  $\text{C}_{21}\text{H}_{24}$   $[\text{M}]^+$ : 276.1878; found: 276.1875.

#### **4-((1E,4E)-1,6-bis(4-methoxyphenyl)hexa-1,4-dien-3-yl)-1,1'-biphenyl (5v)**

The same general procedure was followed. Column chromatography (Silica gel, eluting with 98:2 hexane/EtOAc) afforded the desired product as a pale brown liquid (198.8 mg, 89% yield).

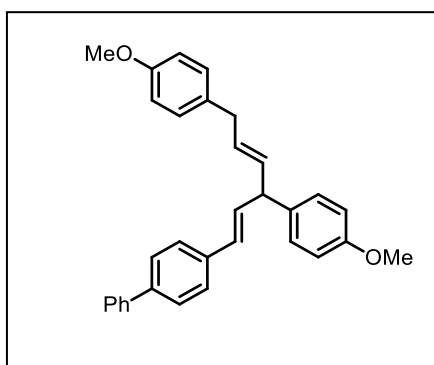

$^1\text{H}$  NMR (400 MHz,  $\text{CDCl}_3$ ):  $\delta$  3.45 (d, 2H,  $J = 6.3$  Hz), 3.84 (s, 3H), 3.86 (s, 3H), 4.27 (t, 1H,  $J = 2.9$  Hz), 5.74-5.79 (m, 1H), 5.86 (dd, 1H,  $J_1 = 15.3$  Hz,  $J_2 = 6.6$  Hz), 6.51 (t, 2H,  $J = 1.9$  Hz), 6.93 (dd, 2H,  $J_1 = 8.6$  Hz,  $J_2 = 1.7$  Hz), 6.96 (dd, 2H,  $J_1 = 7.1$  Hz,  $J_2 = 1.9$  Hz), 7.20 (d, 2H,  $J = 8.2$  Hz), 7.28 (d, 2H,  $J = 8.6$  Hz), 7.37-7.42 (m, 1H), 7.49 (t, 4H,  $J = 7.2$  Hz), 7.61 (d, 2H,  $J = 8.2$  Hz), 7.66 (dd, 2H,  $J_1 = 7.0$  Hz,  $J_2 = 1.7$  Hz);  $^{13}\text{C}$  NMR (100 MHz,  $\text{CDCl}_3$ ):  $\delta$  38.3, 50.7, 55.4, 114.0, 114.1, 126.8, 127.0, 127.3, 127.4, 128.9, 129.1, 129.6, 129.7, 130.7, 132.7, 133.1, 133.3, 135.4, 136.7, 140.0, 140.9, 158.1, 158.4; HRMS (EI,  $m/z$ ) calcd. For  $\text{C}_{32}\text{H}_{30}\text{O}_2$   $[\text{M}]^+$ : 446.2246; found: 446.2238.

#### 4-((1E,4E)-3,6-bis(4-bromophenyl)hexa-1,4-dien-1-yl)-1,1'-biphenyl (5w)

The same general procedure was followed. Column chromatography (Silica gel, eluting with hexane) afforded the desired product as a pale brown liquid (196.2 mg, 72% yield).

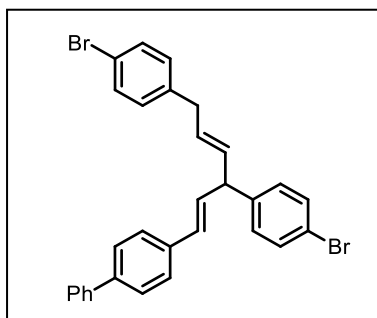

$^1\text{H}$  NMR (400 MHz,  $\text{CDCl}_3$ ):  $\delta$  3.46 (d, 2H,  $J = 6.3$  Hz), 4.24 (t, 1H,  $J = 6.3$  Hz), 5.71-5.78 (m, 1H), 5.80-5.87 (m, 1H), 6.33-6.38 (m, 1H), 6.43 (dd, 1H,  $J_1 = 15.9$  Hz,  $J_2 = 6.2$  Hz), 7.22-7.27 (m, 7H), 7.28 (q, 1H,  $J = 0.4$  Hz), 7.29-7.31 (m, 2H), 7.33 (quin, 1H,  $J = 0.8$  Hz), 7.34-7.35 (m, 1H), 7.36 (t, 1H,  $J = 0.8$  Hz), 7.38-7.40 (m, 1H), 7.43 (dd, 2H,  $J_1 = 6.5$  Hz,  $J_2 = 1.8$  Hz);  $^{13}\text{C}$  NMR (100 MHz,  $\text{CDCl}_3$ ): 39.1, 51.4, 121.0, 126.2, 126.6, 127.9, 128.1, 128.5, 128.6, 128.7, 129.3, 130.6, 131.6, 133.1, 133.4, 136.4, 140.5, 143.0; HRMS (EI,  $m/z$ ) calcd. For  $\text{C}_{30}\text{H}_{24}\text{Br}_2$   $[\text{M}]^+$ : 542.0245; found: 542.0248.

#### 4-((1E,4E)-1,6-bis(4-fluorophenyl)hexa-1,4-dien-3-yl)-1,1'-biphenyl (5x)

The same general procedure was followed. Column chromatography (Silica gel, eluting with hexane) afforded the desired product as a pale white liquid (194.8 mg, 92% yield).

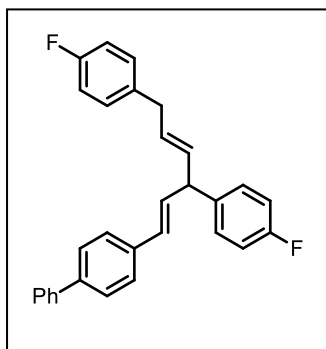

$^1\text{H}$  NMR (600 MHz,  $\text{CDCl}_3$ ):  $\delta$  3.45 (d, 2H,  $J = 6.6$  Hz), 4.28 (t, 1H,  $J = 6.2$  Hz), 5.72-5.76 (m, 1H), 5.82 (dd, 1H,  $J_1 = 15.3$  Hz,  $J_2 = 6.6$  Hz), 6.44-6.51 (m, 2H), 7.06 (dt, 2H,  $J_1 = 15.2$  Hz,  $J_2 = 11.4$  Hz,  $J_3 = 5.7$  Hz), 7.20 (q, 2H,  $J = 2.5$  Hz), 7.28 (q, 2H,  $J = 2.4$  Hz), 7.39 (t, 1H,  $J = 7.1$  Hz), 7.47-7.49 (m, 4H), 7.60 (d, 2H,  $J = 8.1$  Hz), 7.65 (d, 2H,  $J = 7.9$  Hz);  $^{13}\text{C}$  NMR (150 MHz,  $\text{CDCl}_3$ ):  $\delta$  37.7, 50.1, 114.7 (d,  $J = 7.8$  Hz), 114.9 (d,  $J = 7.8$  Hz), 126.2, 126.5, 126.8, 126.9, 128.3, 129.0 (d,  $J = 7.8$  Hz), 129.4 (d,  $J = 7.6$  Hz), 130.0, 131.7, 132.8, 135.5 (d,  $J = 3$  Hz), 135.8, 138.2 (d,  $J = 3$  Hz), 139.7, 140.2, 161.0 (d,  $J = 242.4$ ), 161.1 (d,  $J = 243.3$  Hz); HRMS (EI,  $m/z$ ) calcd. For  $\text{C}_{30}\text{H}_{24}\text{F}_2$   $[\text{M}]^+$ : 422.1846; found: 422.1851.

#### 4,4'-((1E,4E)-3-(3,5-dichlorophenyl)hexa-1,4-diene-1,6-diyl)bis(methoxybenzene) (5y)

The same general procedure was followed. Column chromatography (Silica gel, eluting with 98:2 hexane/EtOAc) afforded the desired product as a brownish yellow liquid (167.2 mg, 76% yield).

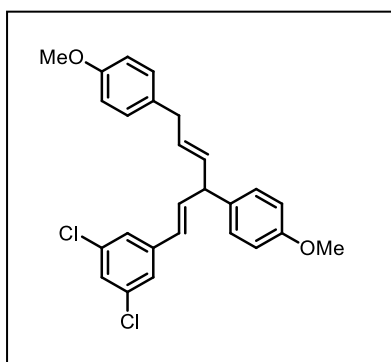

$^1\text{H}$  NMR (400 MHz,  $\text{CDCl}_3$ ):  $\delta$  3.37 (d, 2H,  $J = 6.0$  Hz), 3.79 (s, 3H), 3.80 (s, 3H), 4.16 (t, 1H,  $J = 6.5$  Hz), 5.63-5.70 (m, 1H), 5.74 (dd, 1H,  $J_1 = 15.3$  Hz,  $J_2 = 6.2$  Hz), 6.24 (dd, 1H,  $J_1 = 15.8$  Hz,  $J_2 = 0.8$  Hz), 6.41 (dd, 1H,  $J_1 = 15.8$  Hz,  $J_2 = 6.9$  Hz), 6.86 (dd, 2H,  $J_1 = 6.6$  Hz,  $J_2 = 2.1$  Hz), 6.88 (dd, 2H,  $J_1 = 6.6$  Hz,  $J_2 = 2.1$  Hz), 7.11 (dd, 2H,  $J_1 = 6.5$  Hz,  $J_2 = 2.0$  Hz), 7.15 (dd, 2H,  $J_1 = 6.5$  Hz,  $J_2 = 2.0$  Hz), 7.18 (t, 1H,  $J = 1.8$  Hz), 7.21 (d, 2H,  $J = 1.8$  Hz);  $^{13}\text{C}$  NMR

(150 MHz, CDCl<sub>3</sub>): 38.2, 50.4, 55.3, 113.9, 114.1, 124.6, 126.9, 127.7, 129.0, 129.5, 131.1, 132.5, 132.6, 134.6, 135.1, 136.0, 140.6, 158.1, 158.4; HRMS (EI, m/z) calcd. For C<sub>26</sub>H<sub>24</sub>Cl<sub>2</sub>O<sub>2</sub> [M]<sup>+</sup>: 438.1153; found: 438.1156.

#### 4,4'-((2E,5E)-7-methylocta-2,5-diene-1,4-diyl)bis(methoxybenzene) (5z)

The same general procedure was followed. Column chromatography (Silica gel, eluting with 98:2 hexane/EtOAc) afforded the desired product as a yellow brown liquid (93.2 mg, 55% yield).

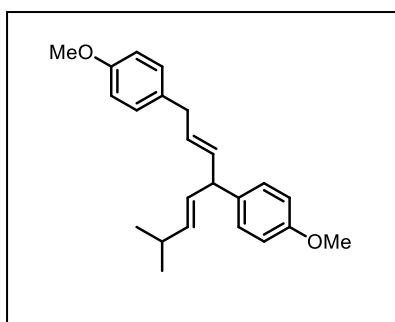

<sup>1</sup>H NMR (400 MHz, CDCl<sub>3</sub>): δ 0.99 (d, 3H, *J* = 2.9 Hz), 1.00 (d, 3H, *J* = 3.0 Hz), 2.24-2.36 (m, 1H), 3.36 (d, 2H, *J* = 6.5 Hz), 3.79 (s, 6H), 3.94 (t, 2H, *J* = 6.7 Hz), 5.41-5.47 (m, 1H), 5.52-5.56 (m, 1H), 5.57-5.61 (m, 1H), 5.65-5.71 (m, 1H), 6.84 (dd, 2H, *J*<sub>1</sub> = 4.6 Hz, *J*<sub>2</sub> = 1.9 Hz), 6.85 (dd, 2H, *J*<sub>1</sub> = 4.8 Hz, *J*<sub>2</sub> = 2.0 Hz), 7.06 (dd, 2H, *J*<sub>1</sub> = 7.0 Hz, *J*<sub>2</sub> = 2.5 Hz), 7.13 (dd, 2H, *J*<sub>1</sub> = 6.6 Hz, *J*<sub>2</sub> = 2.0 Hz); <sup>13</sup>C NMR (100 MHz, CDCl<sub>3</sub>): δ 22.6, 22.7, 31.1, 38.1, 50.1, 55.3, 113.85, 113.87, 128.9, 129.52, 129.55, 132.9, 134.3, 136.2, 138.2, 157.9; HRMS (EI, m/z) calcd. For C<sub>23</sub>H<sub>28</sub>O<sub>2</sub> [M]<sup>+</sup>: 336.2089; found: 336.2078.

#### **Representative procedure for unsymmetrical skipped diene compounds:**

In an oven dried round bottom flask containing a stir bar, containing 4-biphenylboronic acid (0.5 mmol) and corresponding hydrazones of prenyl (1.0 equivalent) and 4-methoxy substituted cinnamaldehyde were added. Dry 1,4 Dioxane (2mL) was then added followed by Na<sub>2</sub>CO<sub>3</sub> (1.5 equivalent) and molecular sieves. Then the reaction mixture was purged with N<sub>2</sub> gas for 2 minutes. The mixture was refluxed for 120 °C for 24 hours. After allotted time the reaction mixture was cooled to room temperature. The mixture was diluted with EtOAc (15 mL) and washed with water (25 mL), followed by brine solution (25 mL) and dried over Na<sub>2</sub>SO<sub>4</sub>, and evaporated in *vacuo*. The crude mixture was loaded on a silica gel column chromatography and purified using (Hexane) to isolate the desired skipped diene products.

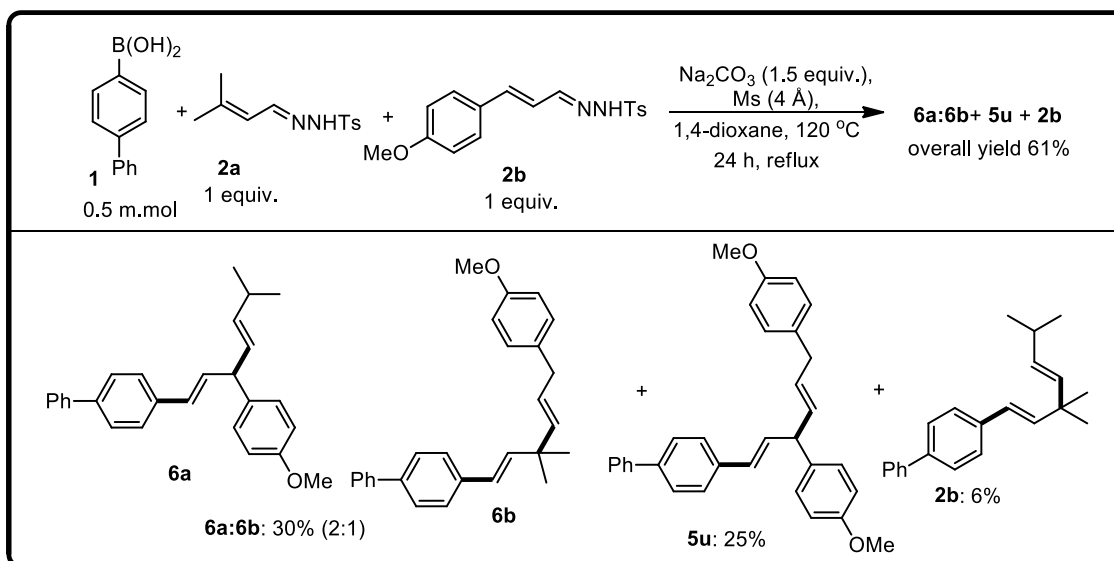

### Spectral data for unsymmetrical skipped diene compounds:

**4-((1E,4E)-3-(4-methoxyphenyl)-6-methylhepta-1,4-dien-1-yl)-1,1'-biphenyl(6a):** 4-  
**((1E,4E)-6-(4-methoxyphenyl)-3,3-dimethylhexa-1,4-dien-1-yl)-1,1'-biphenyl(6b)** (2:1  
**inseparable mixture)**

The same general procedure was followed. Column chromatography (Silica gel, eluting with hexane) afforded the desired product as colorless liquid (56.4 mg, 30% yield).

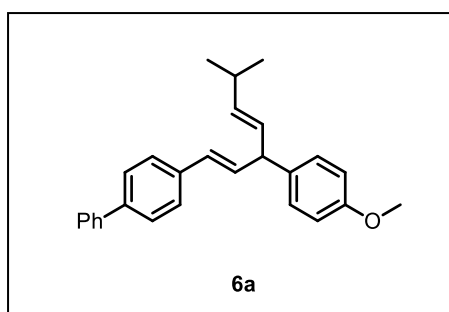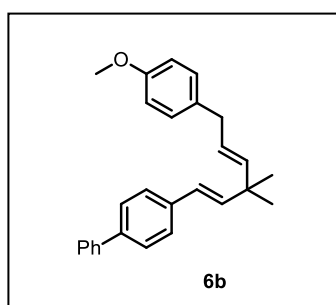

$^1\text{H NMR}$  (400 MHz,  $\text{CDCl}_3$ ):  $\delta$  1.01 (d, 3H,  $J = 3.2$  Hz), 1.03 (d, 3H,  $J = 3.2$  Hz), 1.23 (s, 3H), 2.29-2.40 (m, 1H), 3.32 (d, 1H,  $J = 5.2$  Hz), 3.79 (s, 1H), 3.80 (s, 3H), 4.13 (t, 1H,  $J = 5.6$  Hz), 5.49-5.59 (m, 2H), 5.61-5.67 (m, 1H), 6.21-6.34 (m, 1H), 6.36-6.49 (m, 3H), 6.83-6.86 (m, 1H), 6.87 (dd, 2H,  $J_1 = 6.6$  Hz,  $J_2 = 2.1$  Hz), 7.11 (dd, 1H,  $J_1 = 6.6$  Hz,  $J_2 = 2.0$  Hz), 7.19 (dd, 2H,  $J_1 = 6.8$  Hz,  $J_2 = 2.0$  Hz), 7.30-7.35 (m, 3H), 7.41-7.45 (m, 7H), 7.54 (d, 4H,  $J = 8.4$  Hz),

7.58-7.60 (m, 4H);  $^{13}\text{C}$  NMR (100 MHz,  $\text{CDCl}_3$ ):  $\delta$  22.65, 22.69, 27.6, 31.2, 38.3, 38.8, 50.5, 55.3, 113.8, 113.9, 114.0, 125.5, 126.1, 126.6, 126.7, 126.9, 127.1, 127.2, 127.30, 127.34, 128.81, 128.83, 128.9, 129.0, 129.1, 129.3, 129.4, 129.5, 129.7, 130.6, 133.0, 133.4, 135.7, 136.7, 138.8, 139.8, 139.92, 139.98, 140.8, 157.9, 158.2; HRMS (EI,  $m/z$ ) calcd. For  $\text{C}_{27}\text{H}_{28}\text{O}$   $[\text{M}]^+$ : 368.2140; found: 368.2143.

**$^1\text{H}$  and  $^{13}\text{C}$  NMR spectra**

3a/1  
KKP-173 1H-NMR in CDCl3

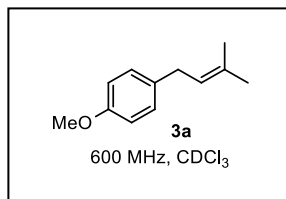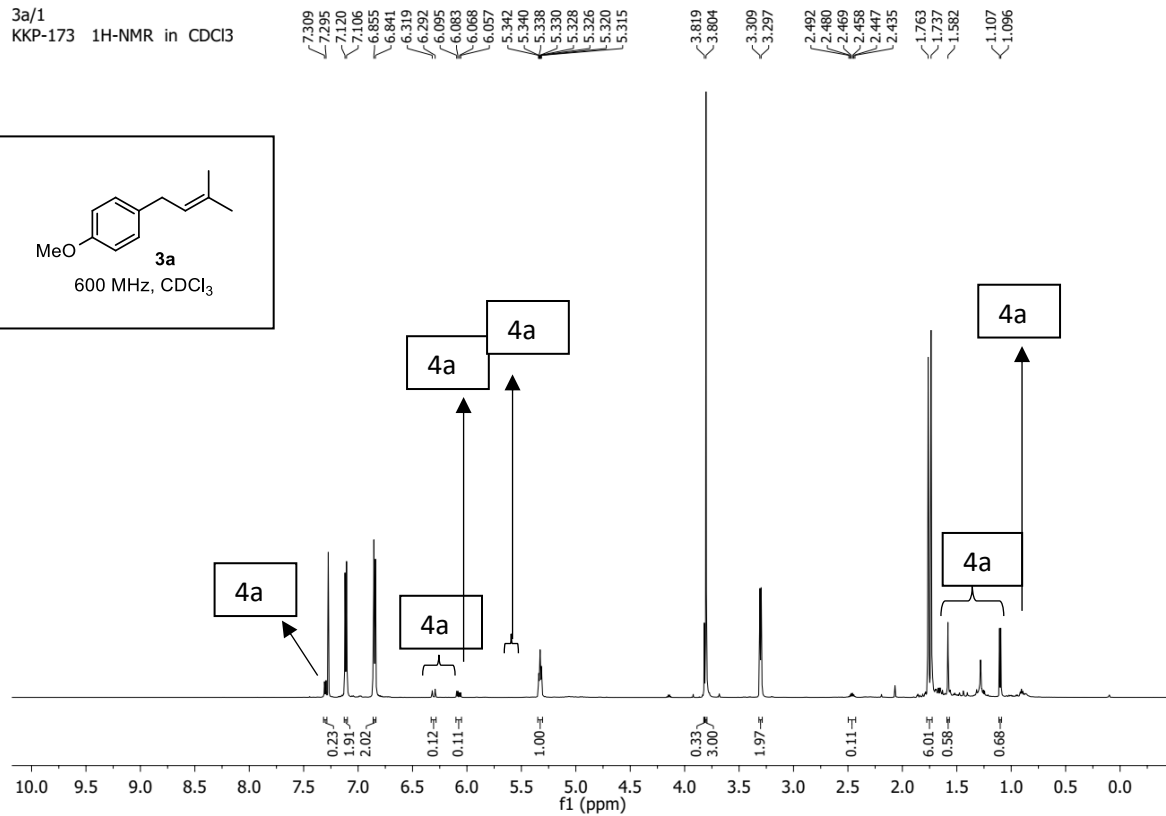

3a/2  
KKP-173 13C NMR in CDCl3 scans 1200

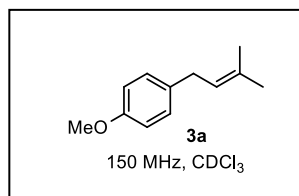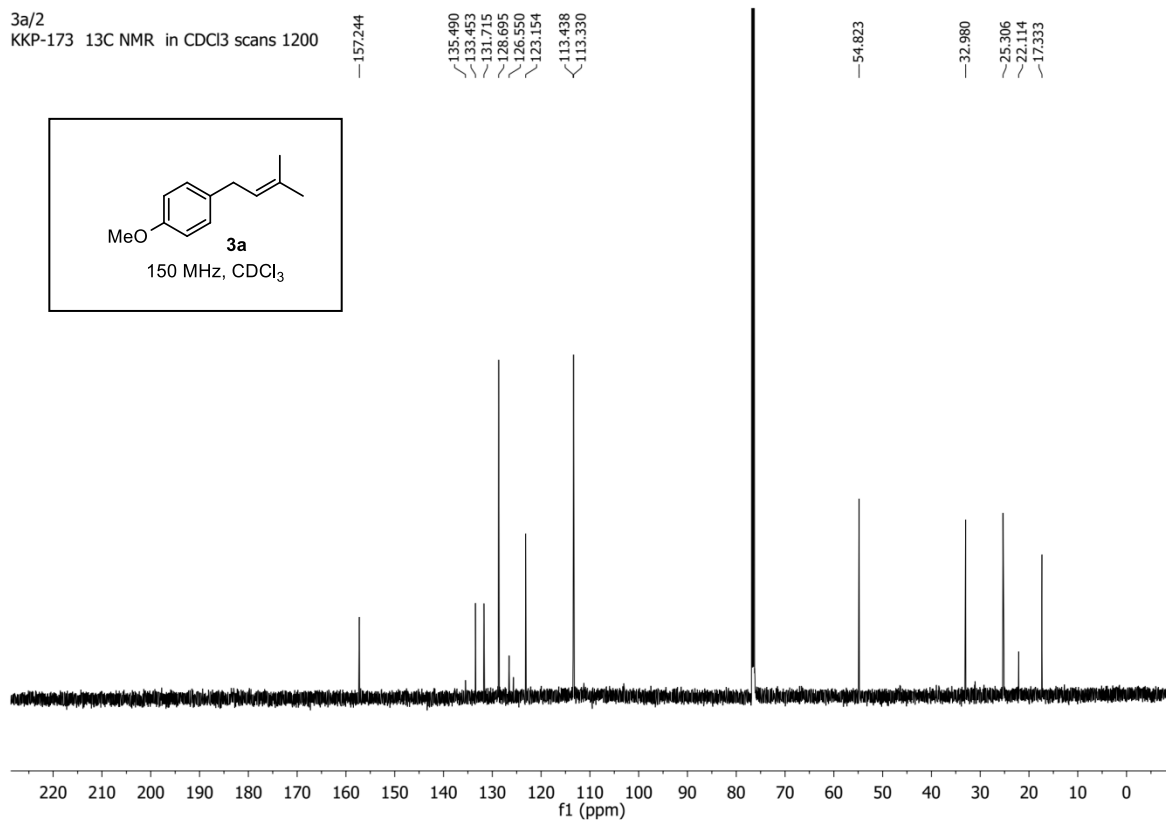



3c/1  
KVL-137 1H-NMR in CDCl<sub>3</sub>

8.124

7.334  
7.319

5.319  
5.317  
5.314  
5.312  
5.309  
5.304  
5.302  
5.300  
5.297  
5.294  
5.292  
5.290  
5.287  
5.285

3.452  
3.439

1.780  
1.730

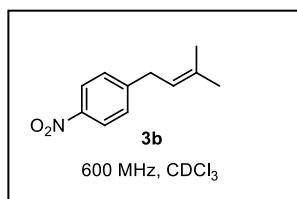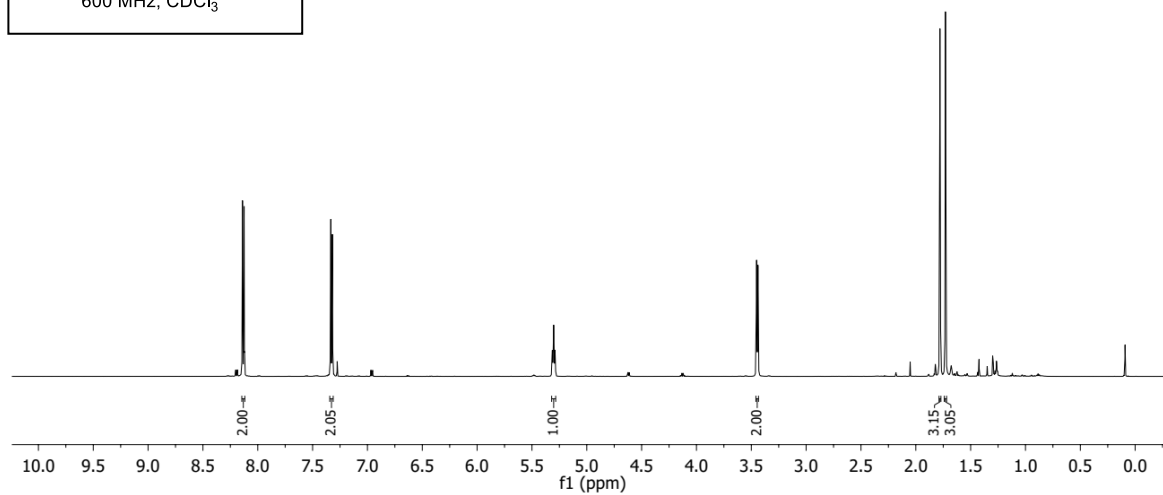

07-KVL-137/2  
KVL-137 13C NMR in CDCl<sub>3</sub>

149.691  
146.204

134.423  
129.000  
123.571  
121.122

34.194

25.690

17.860

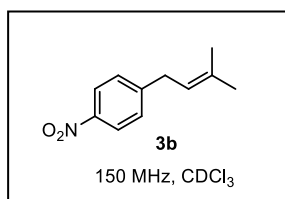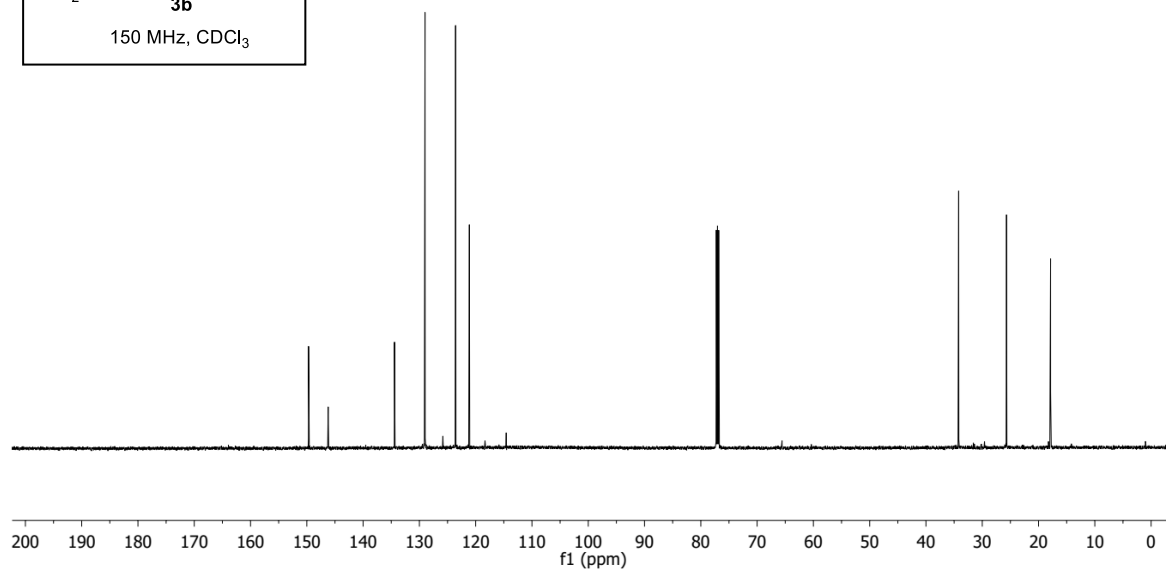

KVL-138  
single\_pulse

7.549  
7.545  
7.533  
7.528  
7.263  
7.242

5.284  
5.281  
5.278  
5.274  
5.271  
5.266  
5.263  
5.259  
5.256  
5.252  
5.248  
5.244  
5.241  
5.237  
5.234

3.383  
3.365

1.744  
1.691

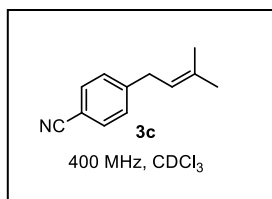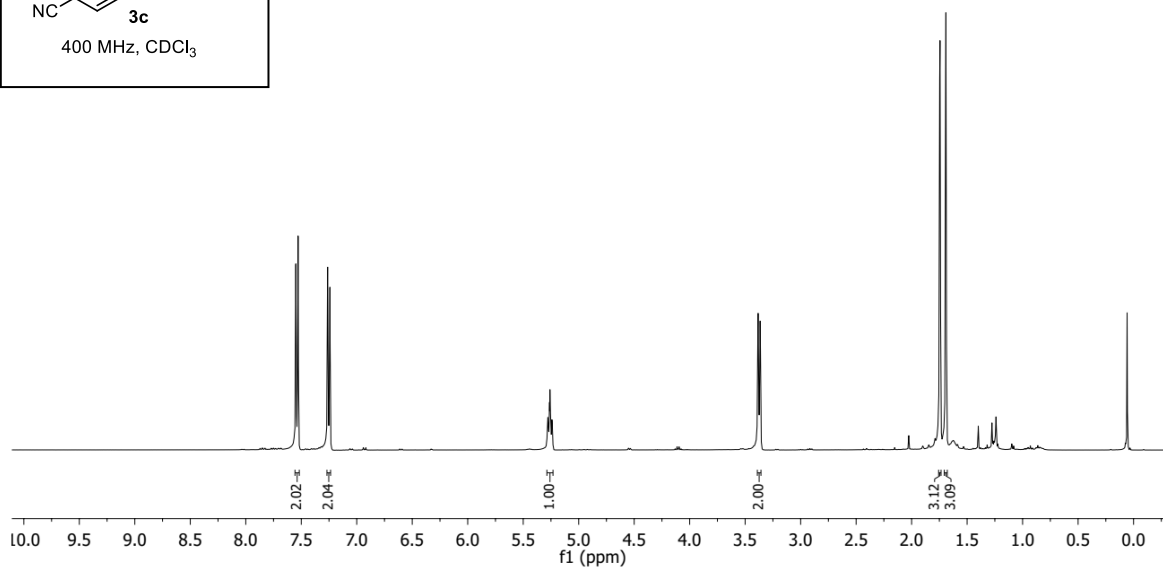

KVL-138  
single pulse decoupled gated NOE

147.584

134.333

132.245

129.160

121.395

119.245

109.640

34.531

25.793

17.956

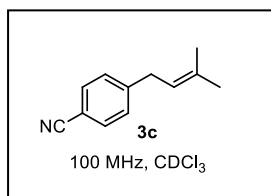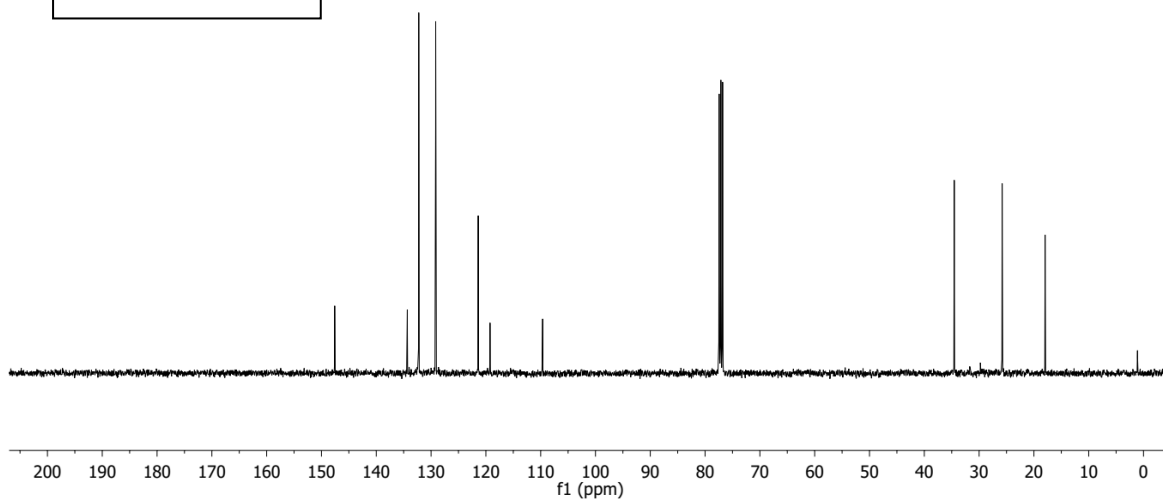

KVL-58-11  
single\_pulse

7.3036  
7.2987  
7.2868  
7.2818  
6.8441  
6.8390  
6.8273  
6.8222  
6.2566  
6.2161  
6.0874  
6.0470  
5.4421  
5.4020  
5.3715  
5.3560  
5.3321  
5.3167  
-3.7928  
2.3218  
2.3039  
2.2873  
2.2706  
2.2538  
2.2372  
2.2207  
2.2042  
1.1640  
0.9875  
0.9706

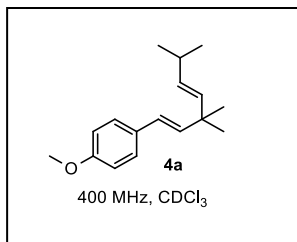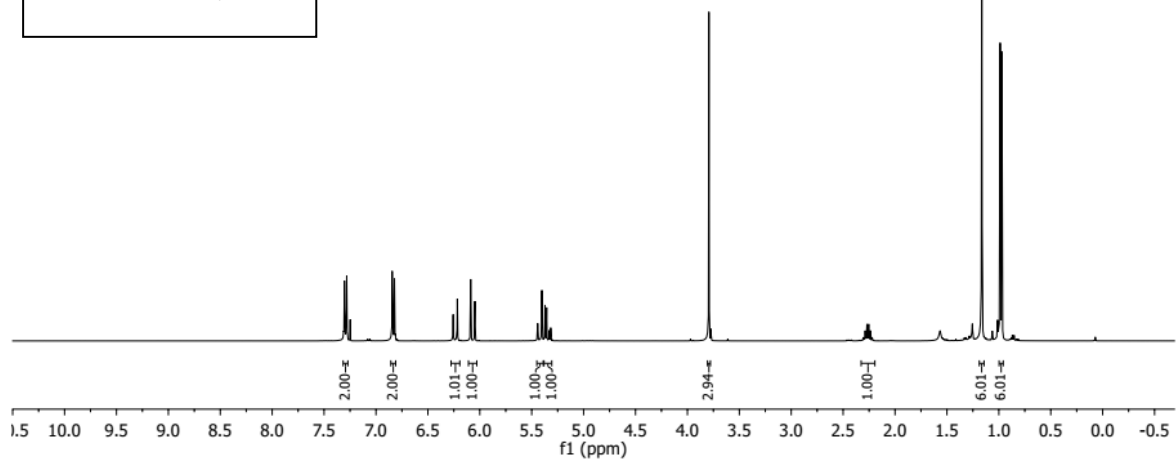

KVL-58  
single pulse decoupled gated NOE

158.799  
138.022  
135.956  
134.067  
130.905  
127.284  
125.122  
114.015  
55.356  
38.307  
31.231  
27.840  
22.935

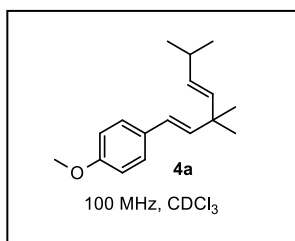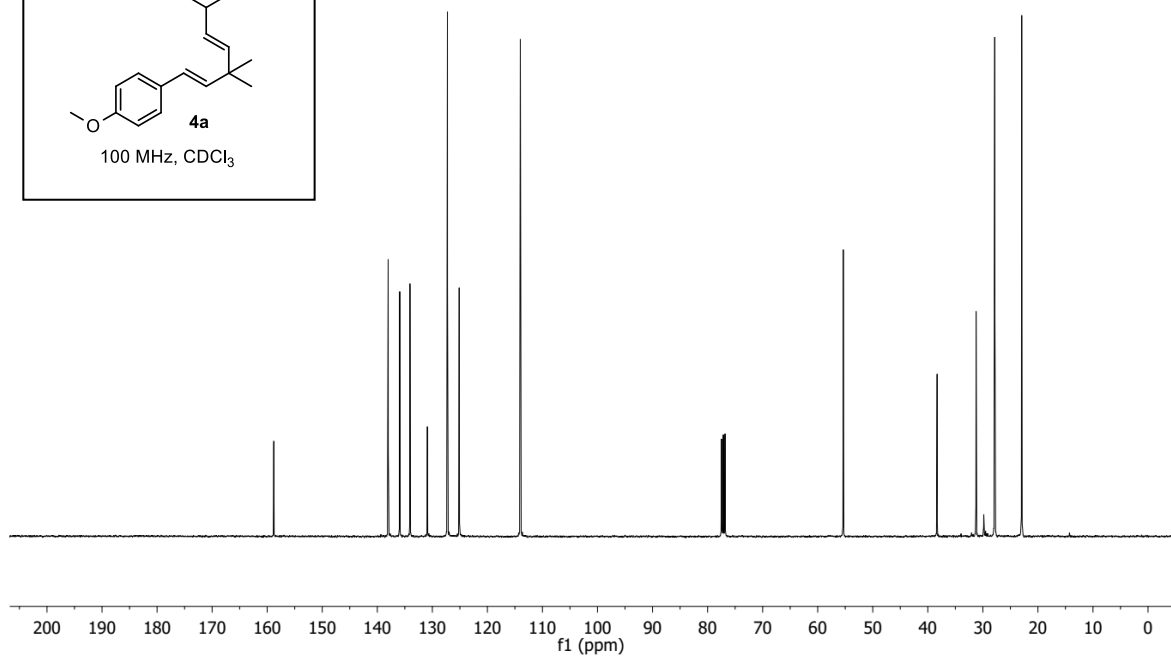

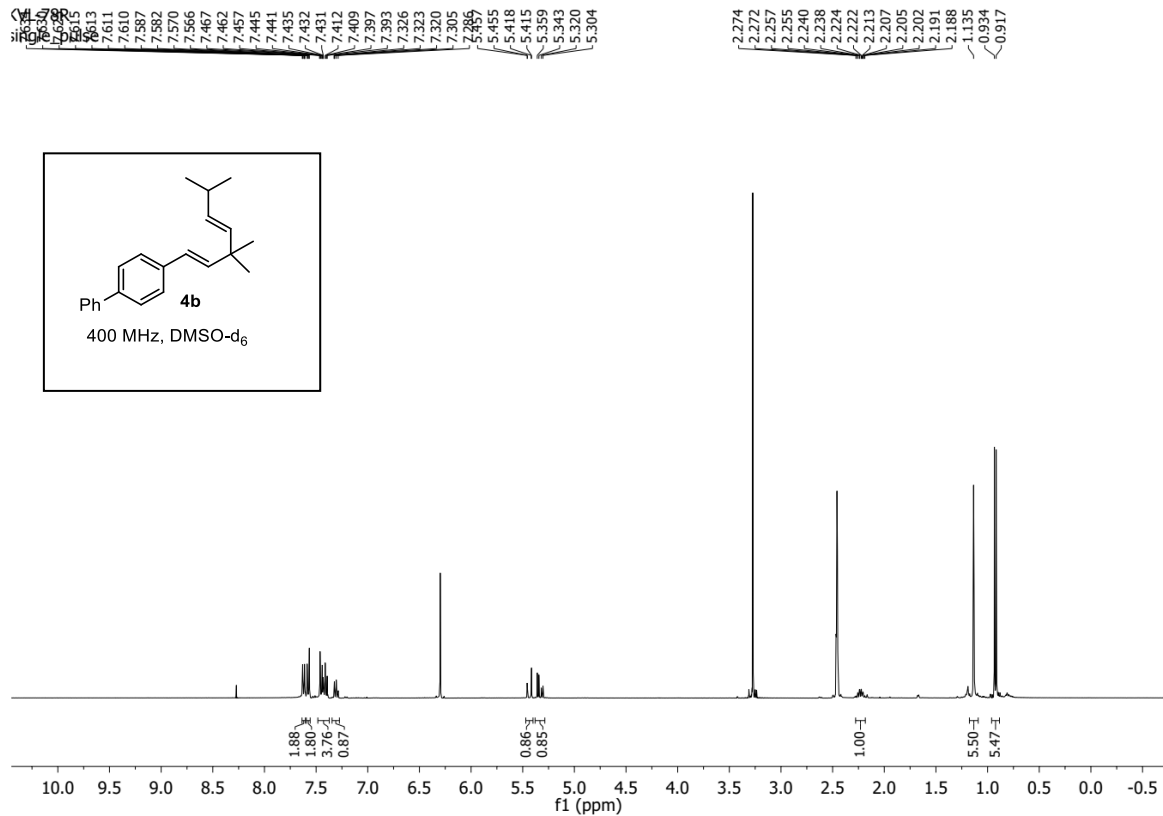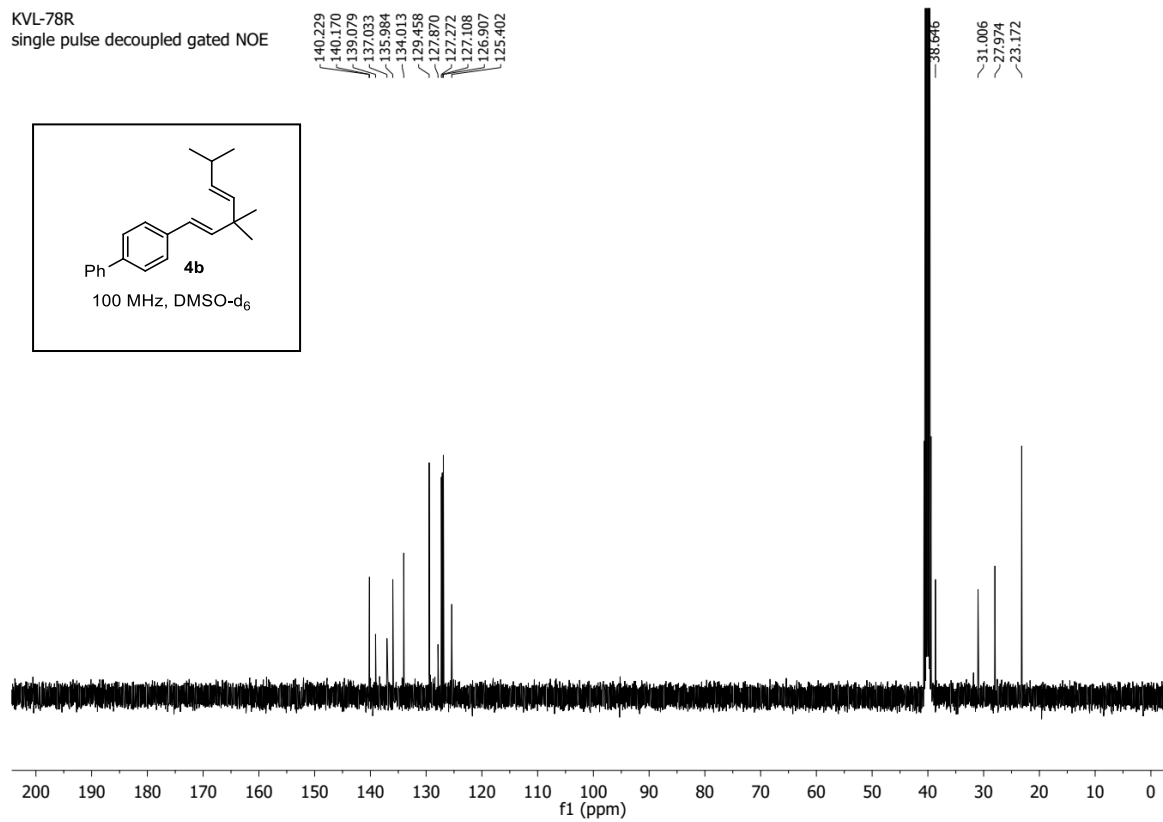

KVL-112  
single\_pulse

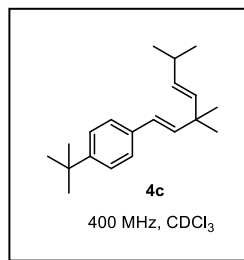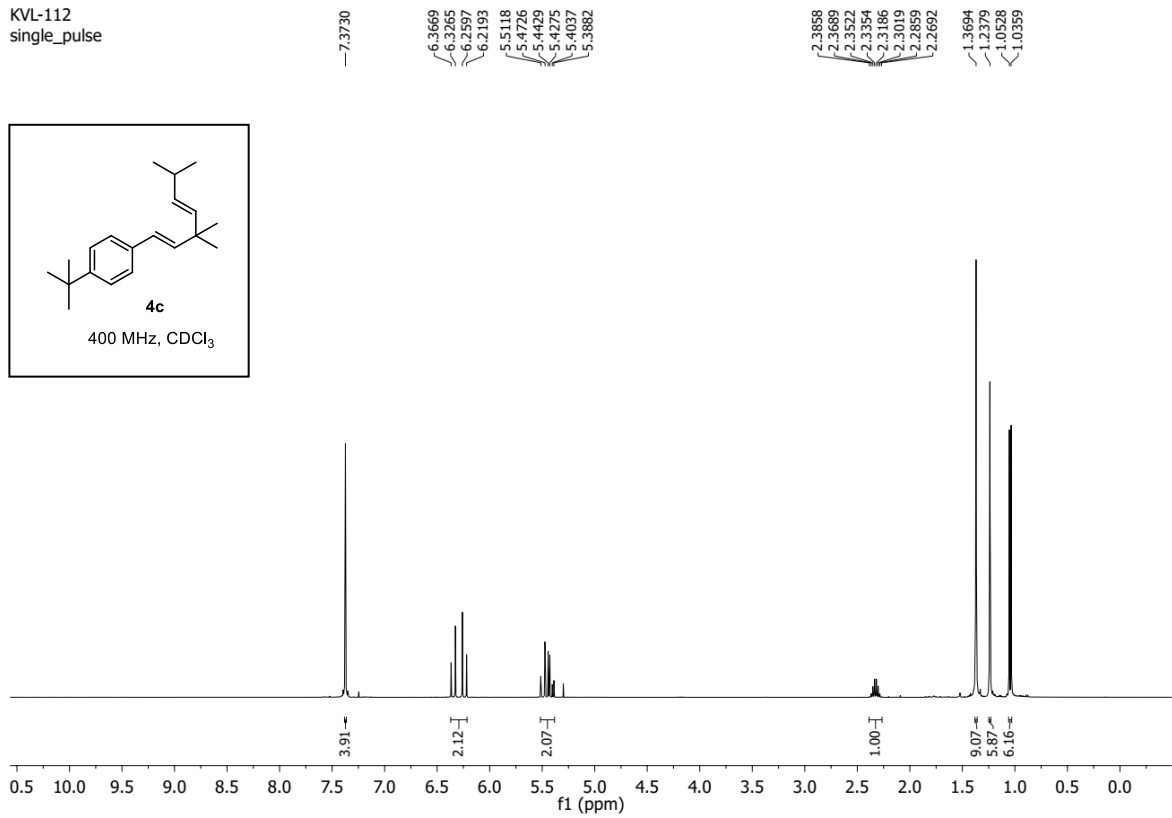

KVL-112  
single pulse decoupled gated NOE

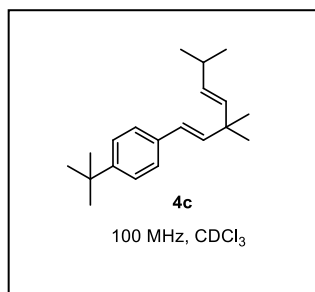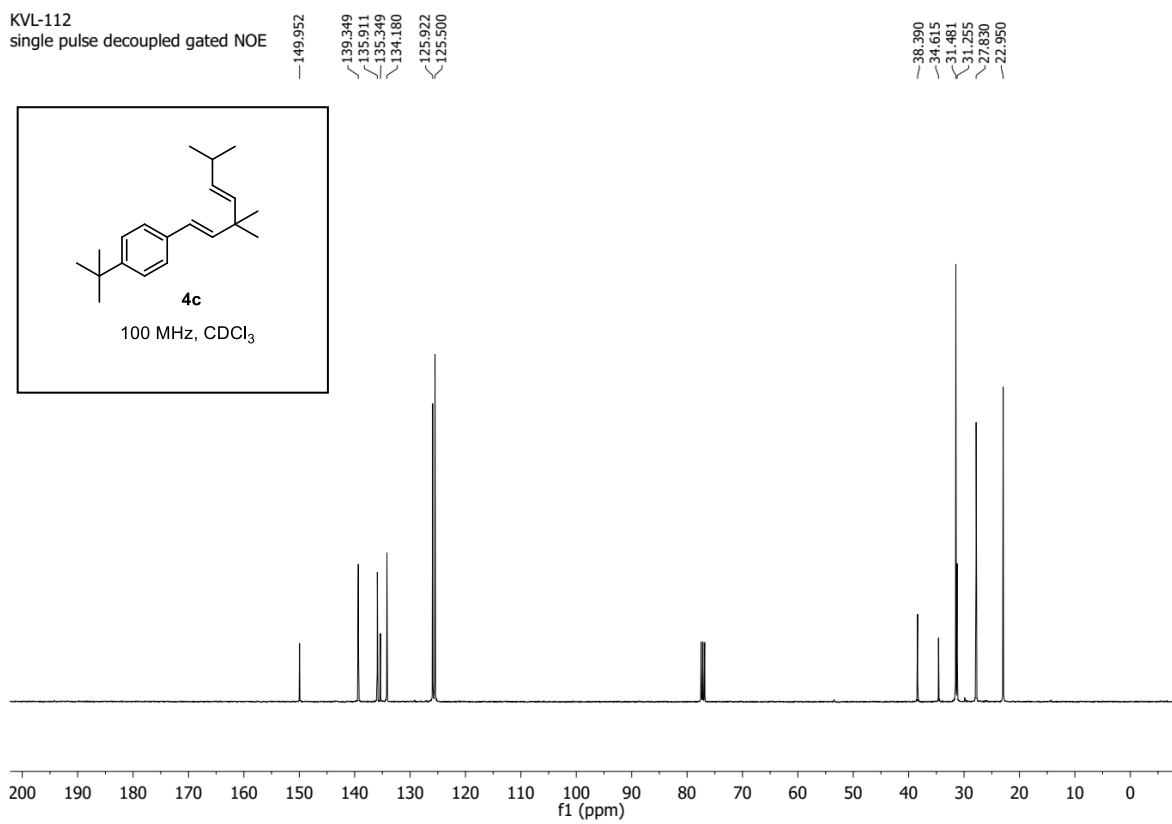

KVL-208  
single\_pulse

7.337  
7.331  
7.323  
7.315  
7.308  
7.301  
7.001  
6.996  
6.979  
6.957  
6.281  
6.240  
6.144  
6.104  
5.449  
5.409  
5.387  
5.372  
5.348  
5.333

2.318  
2.302  
2.285  
2.269  
2.252  
2.236

1.180  
1.001  
0.984

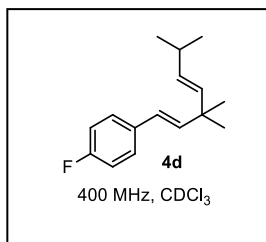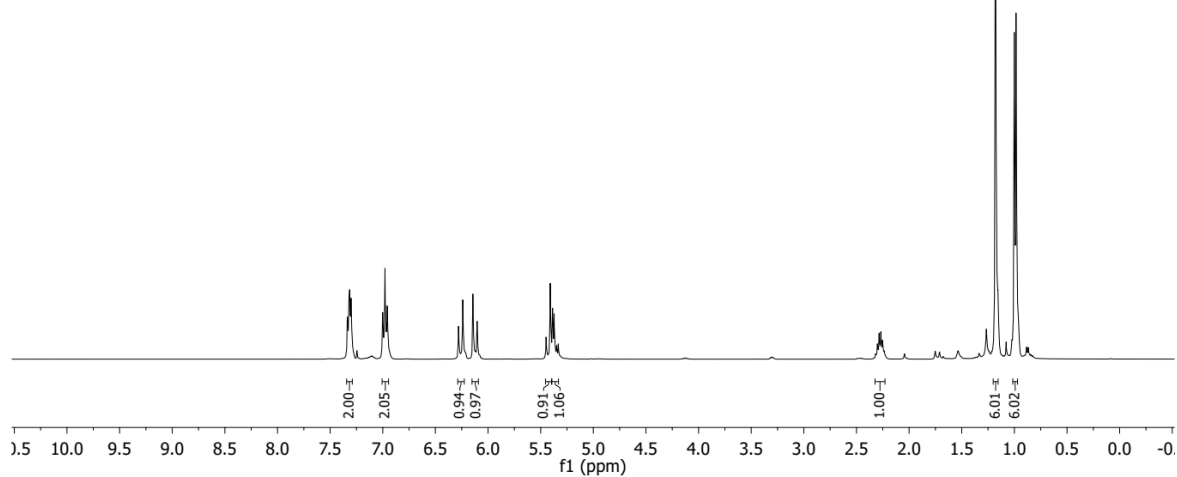

KVL-208  
single pulse decoupled gated NQE

163.210  
162.768

139.835  
135.551  
134.306  
134.180  
127.605  
127.527  
124.603  
115.457  
115.244

38.354  
31.199  
27.690  
22.861

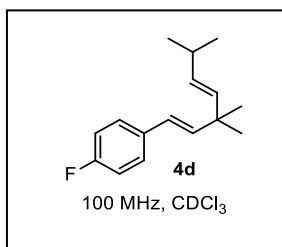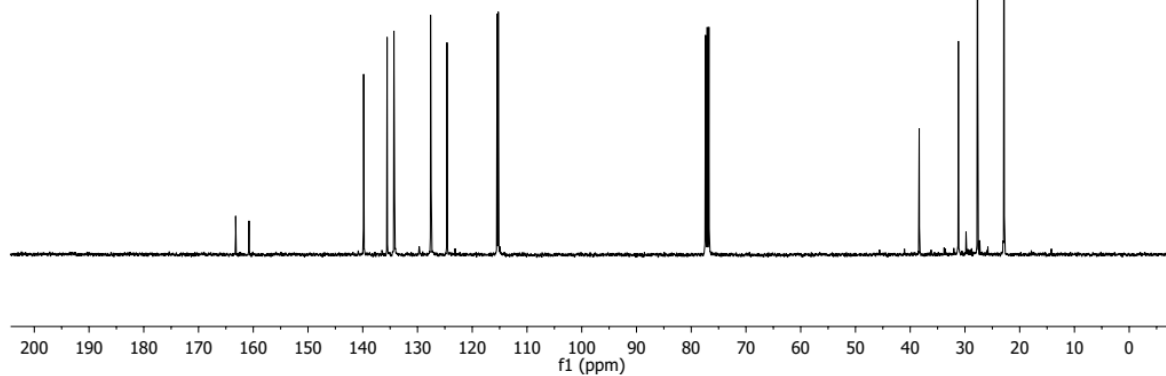

KVL-86  
single\_pulse

7.4111  
7.4062  
7.3946  
7.3898  
7.2297  
7.2260  
7.2131  
7.2085  
6.2557  
6.2152  
6.2071  
6.1667  
5.4370  
5.3974  
5.3787  
5.3640  
5.3394  
5.3247  
2.3293  
2.3125  
2.2957  
2.2790  
2.2627  
2.2465  
2.2301  
2.2133  
1.1741  
0.9951  
0.9782

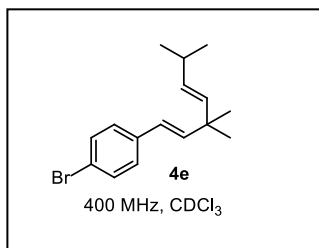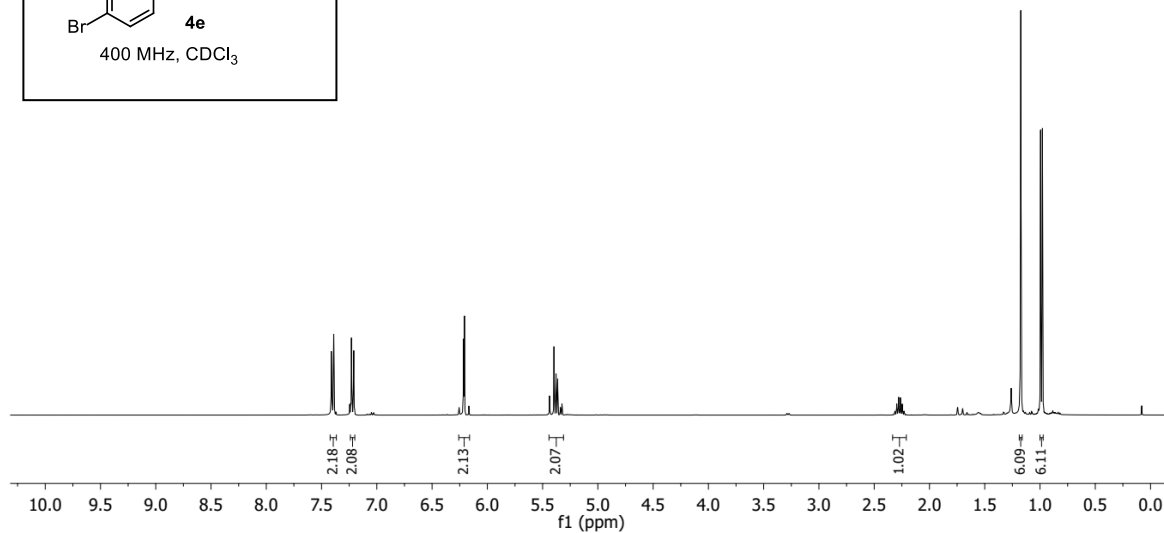

KVL-86  
single pulse decoupled gated NOE

140.918  
137.036  
135.957  
134.451  
131.583  
127.749  
124.673  
120.499  
38.460  
31.203  
27.621  
22.862

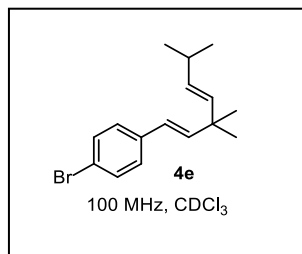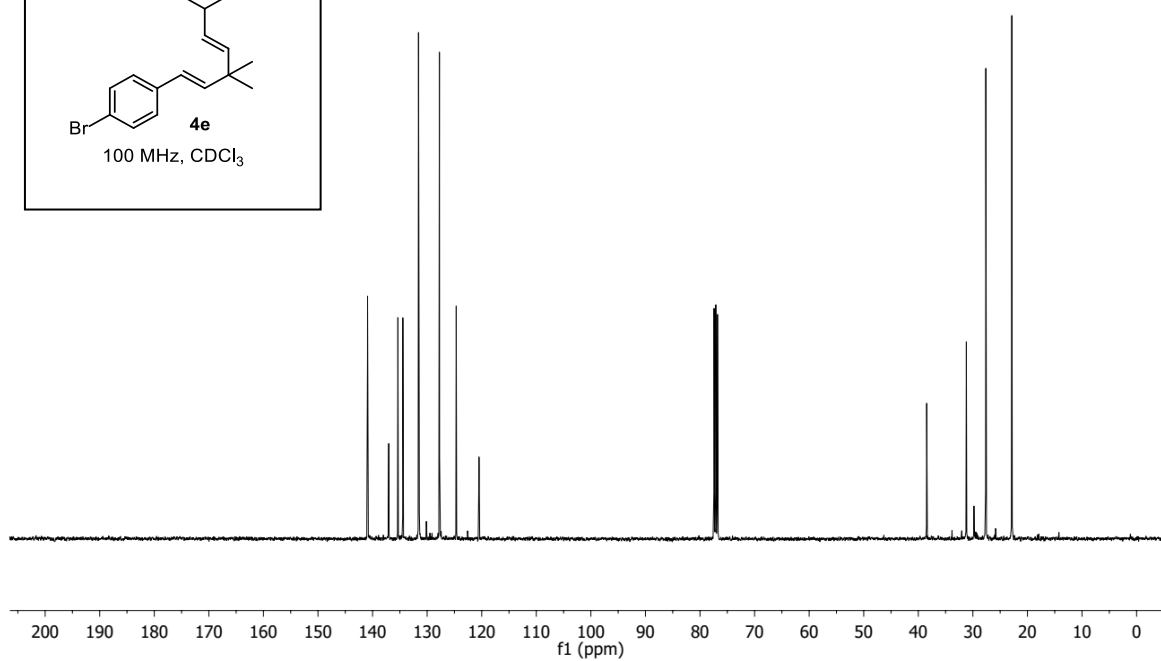

KVL-90  
single\_pulse

7.6091  
7.6046  
7.5927  
7.5881  
7.1055  
7.1009  
7.0891  
7.0844  
-6.2076  
5.4333  
5.3938  
5.3753  
5.3605  
5.3359  
5.3212  
2.3272  
2.3103  
2.2935  
2.2771  
2.2609  
2.2446  
2.2279  
2.2112  
1.1714  
0.9933  
0.9764

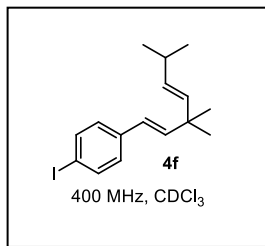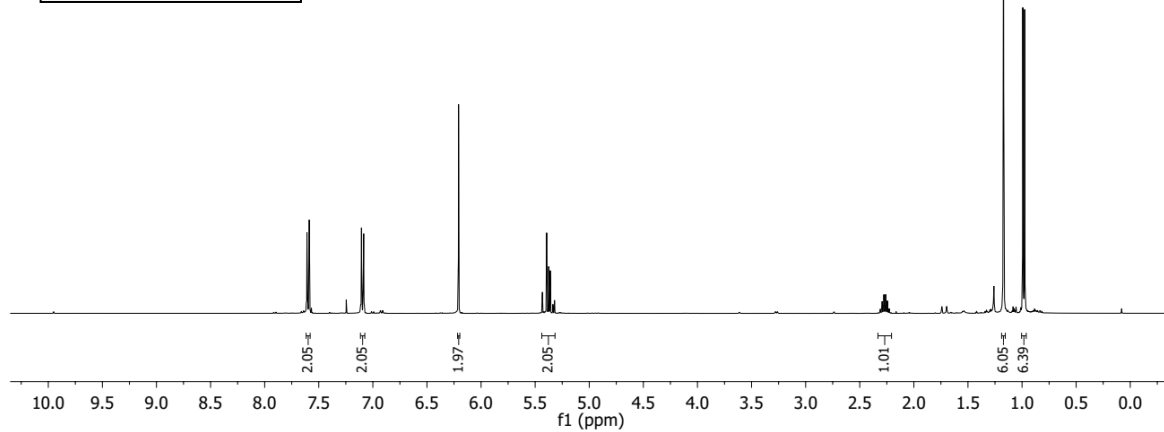

KVL-90B  
single pulse decoupled gated NOE

141.040  
137.640  
137.572  
135.372  
134.476  
128.069  
124.811  
-91.892  
-38.491  
31.229  
27.663  
22.916

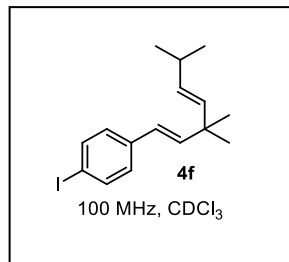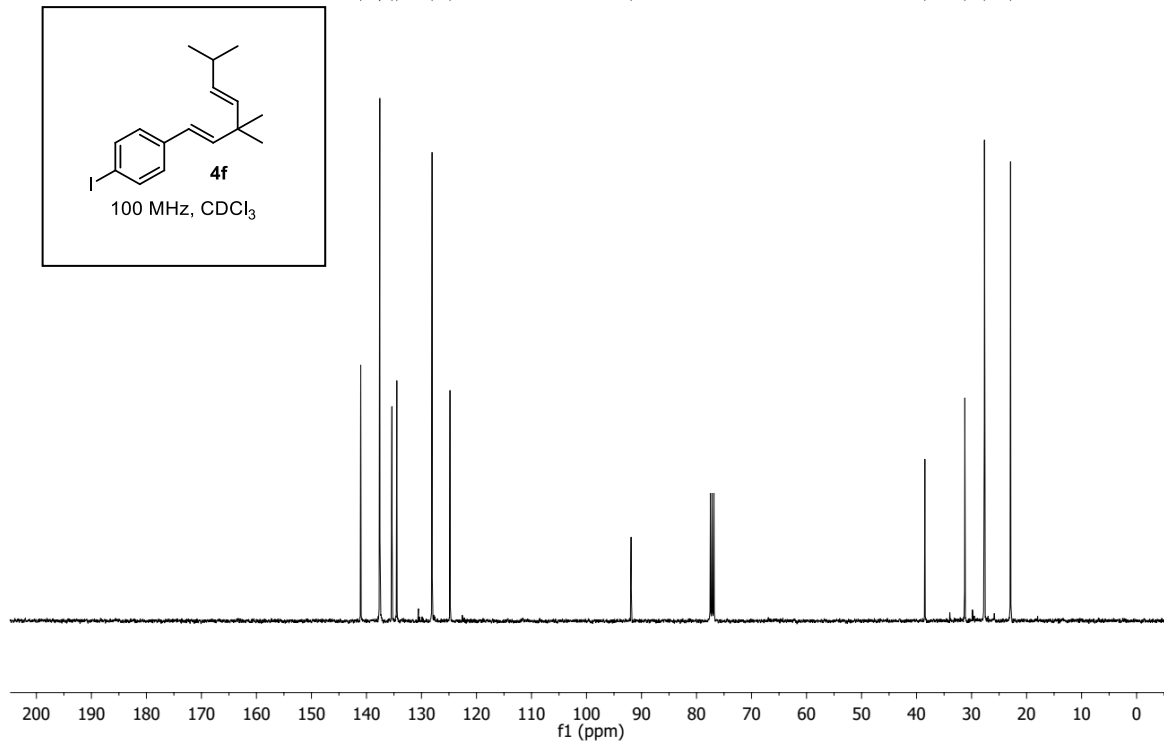



KVL-98-1H/1

7.326  
7.296  
7.287  
7.259

6.308  
6.255  
6.231  
6.177

5.483  
5.429  
5.417  
5.398  
5.347

2.357  
2.337  
2.315  
2.293  
2.272  
2.251

1.207  
1.031  
1.008

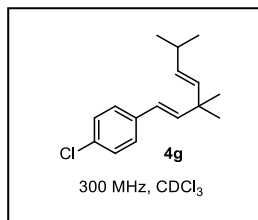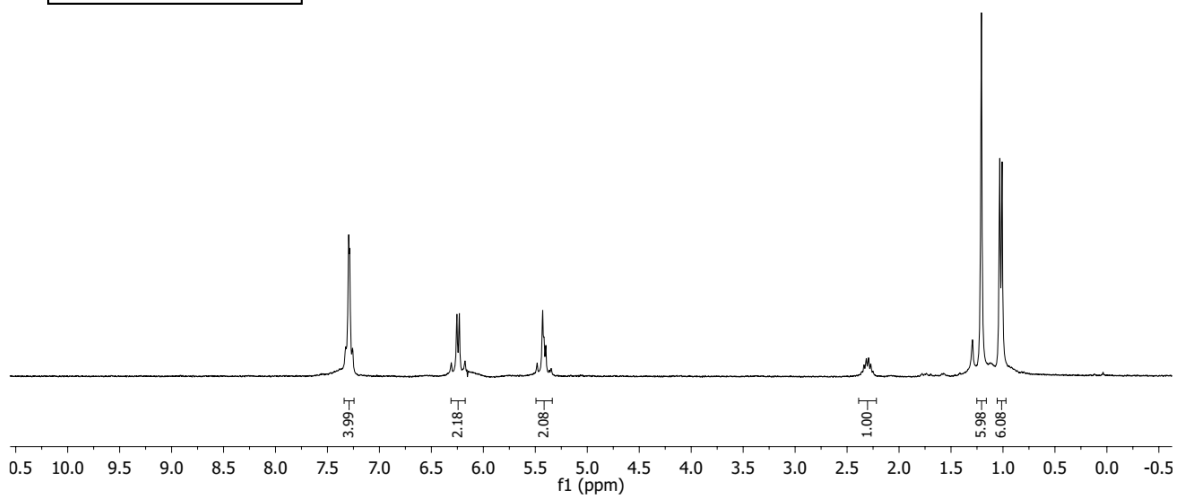

KVL-98

single pulse decoupled gated NOE

140.775  
136.598  
135.427  
134.443  
128.658  
127.411  
124.657

38.452  
31.230  
27.664  
22.889

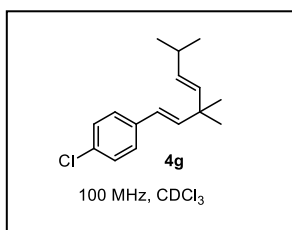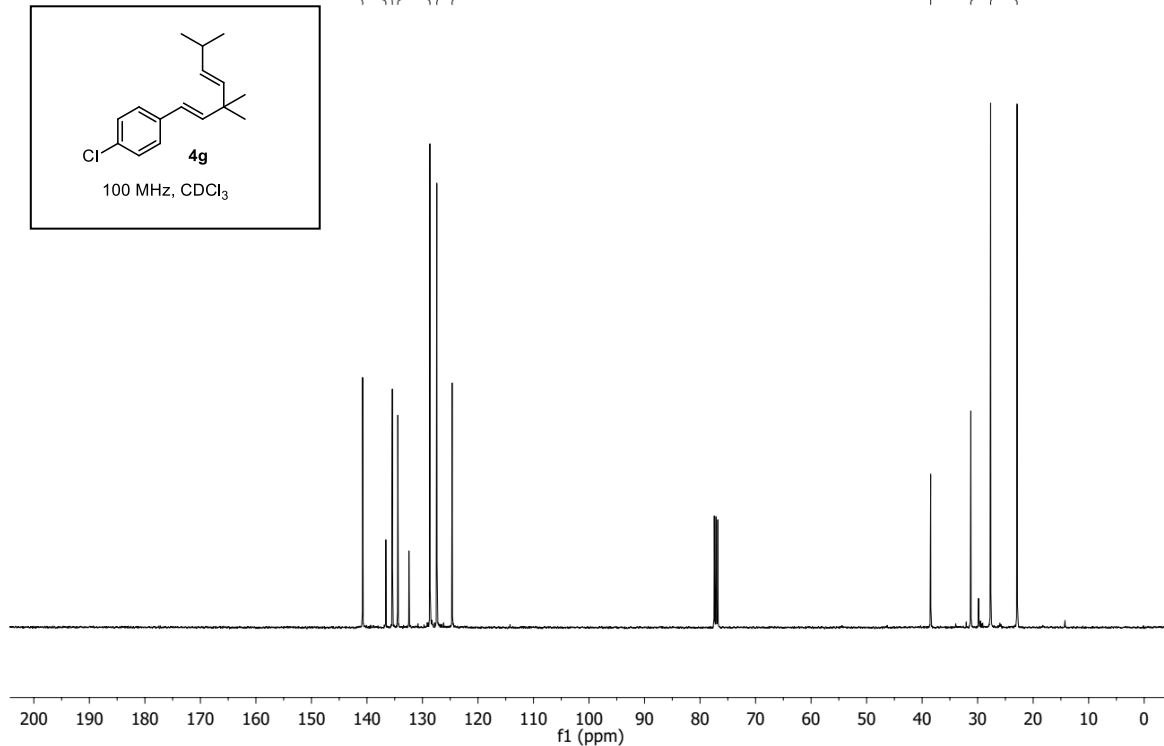

KVL-447  
single\_pulse

7.2588  
7.2537  
7.2425  
7.2374  
6.7817  
6.7764  
6.7652  
6.7600  
6.2497  
6.2093  
6.0838  
6.0433  
5.4665  
5.4661  
5.3780  
5.3627  
5.3387  
5.3234  
5.3059

2.3278  
2.3109  
2.2941  
2.2773  
2.2605  
2.2439  
2.2275  
2.2113  
1.1681  
0.9948  
0.9779

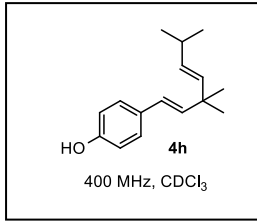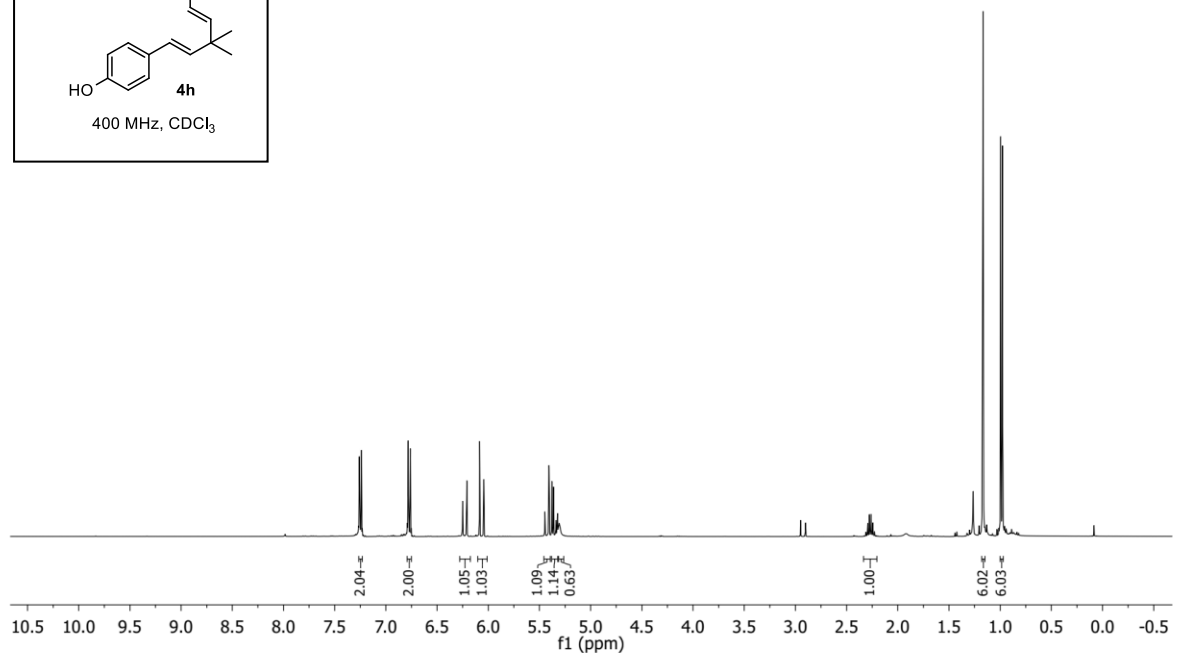

KVL-447  
single pulse decoupled gated NOE

154.665

138.064  
135.847  
134.070  
131.028  
127.452  
125.009  
115.485

38.270

31.191  
27.788  
22.891

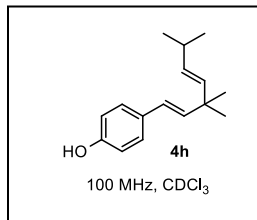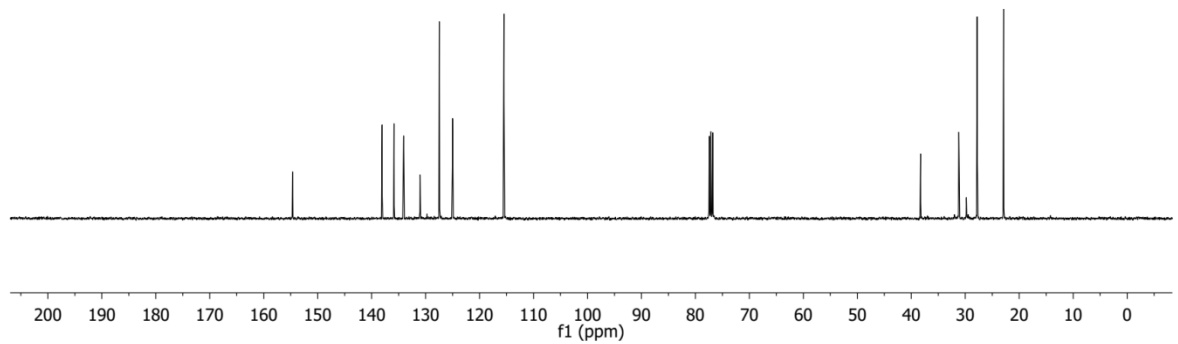

KVL-463  
single\_pulse

7.2714  
7.2663  
7.2545  
7.2486  
6.6950  
6.6781  
6.6729  
6.2351  
6.1947  
6.0346  
5.9942  
5.4527  
5.4508  
5.4135  
5.4115  
5.3727  
5.3570  
5.3334  
5.3177  
2.9344  
2.3049  
2.2882  
2.2723  
2.2554  
2.2385  
2.2217  
1.1649  
0.9807  
0.9738

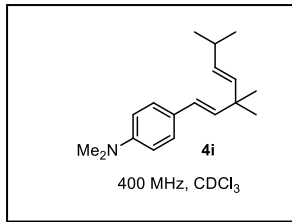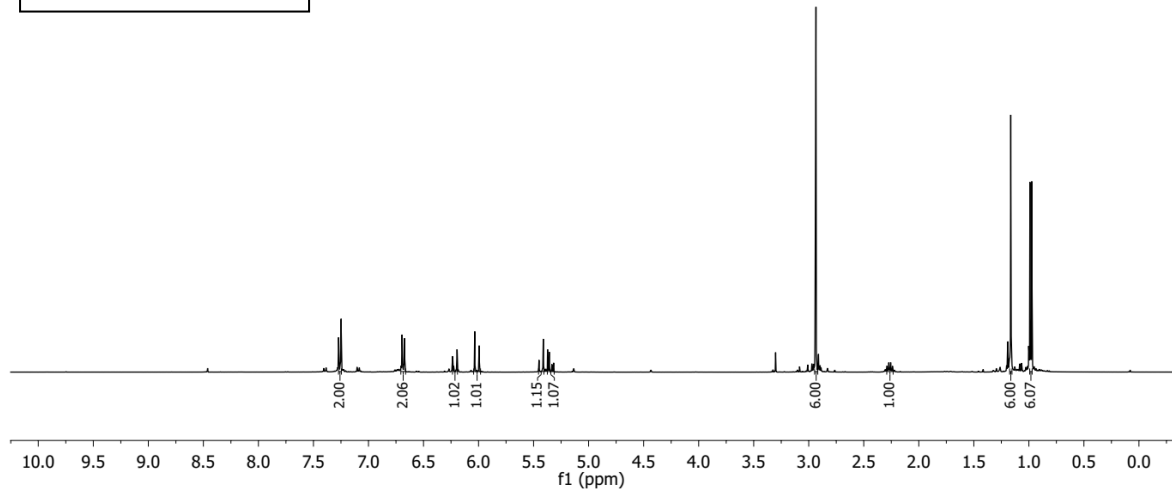

KVL-463  
single pulse decoupled gated NOE

149.811  
136.207  
136.140  
133.790  
126.970  
125.380  
112.828  
40.795  
38.211  
31.179  
27.904  
22.909

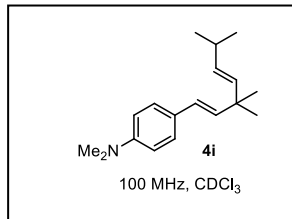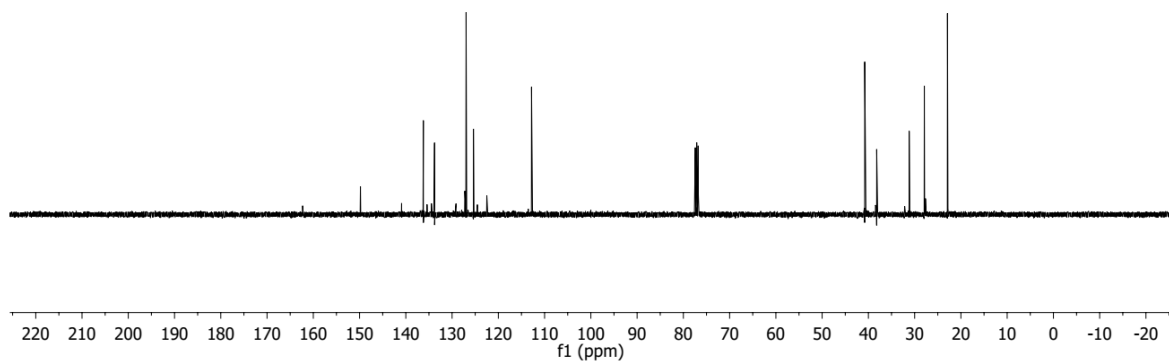

\VL-470  
single\_pulse

7.4366  
7.4322  
7.4205  
7.4155  
7.3263  
7.3217  
7.3100  
7.3053  
6.3098  
6.2693  
6.2598  
6.2193  
5.4512  
5.4116  
5.3936  
5.3790  
5.3544  
5.3396

3.0864  
2.3400  
2.3232  
2.3065  
2.2900  
2.2740  
2.2576  
2.2410  
2.2243  
1.1899  
1.0062  
0.9893

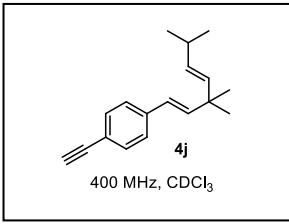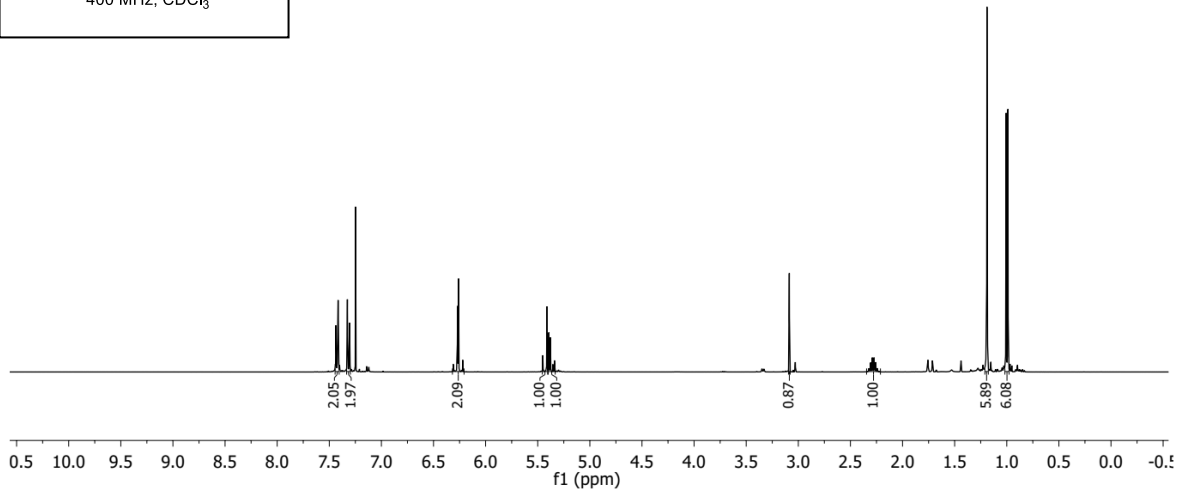

KVL-470  
single\_pulse decoupled gated NOE

141.466  
138.033  
135.362  
134.485  
132.364  
126.075  
125.168  
120.326

83.980  
77.426

38.512  
31.219  
27.630  
22.868

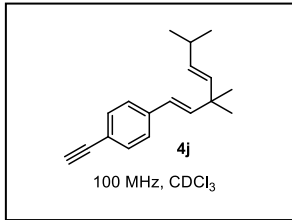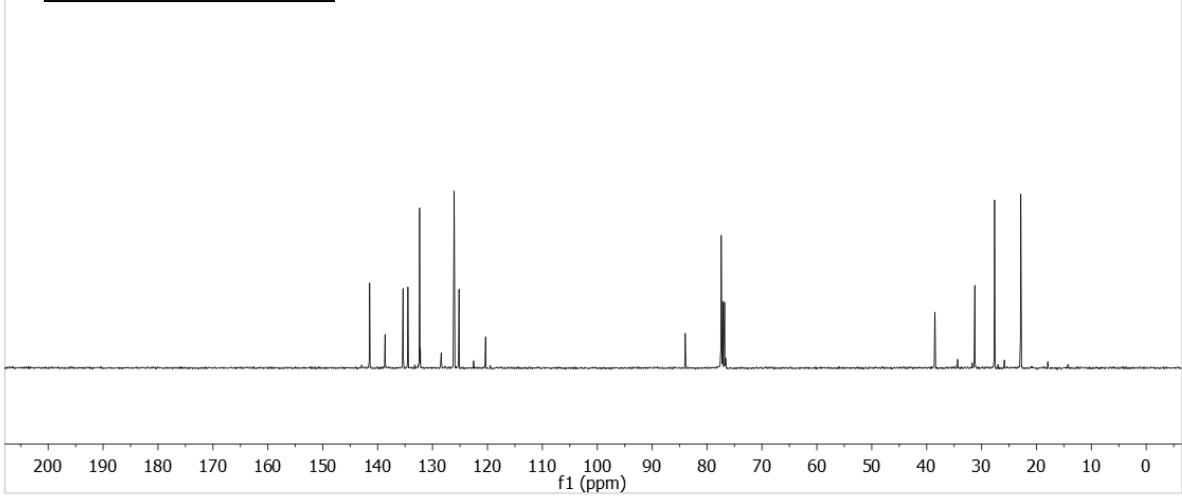

KVL-469  
single\_pulse

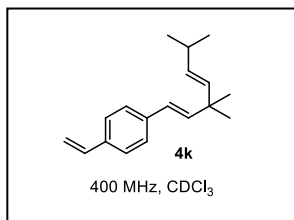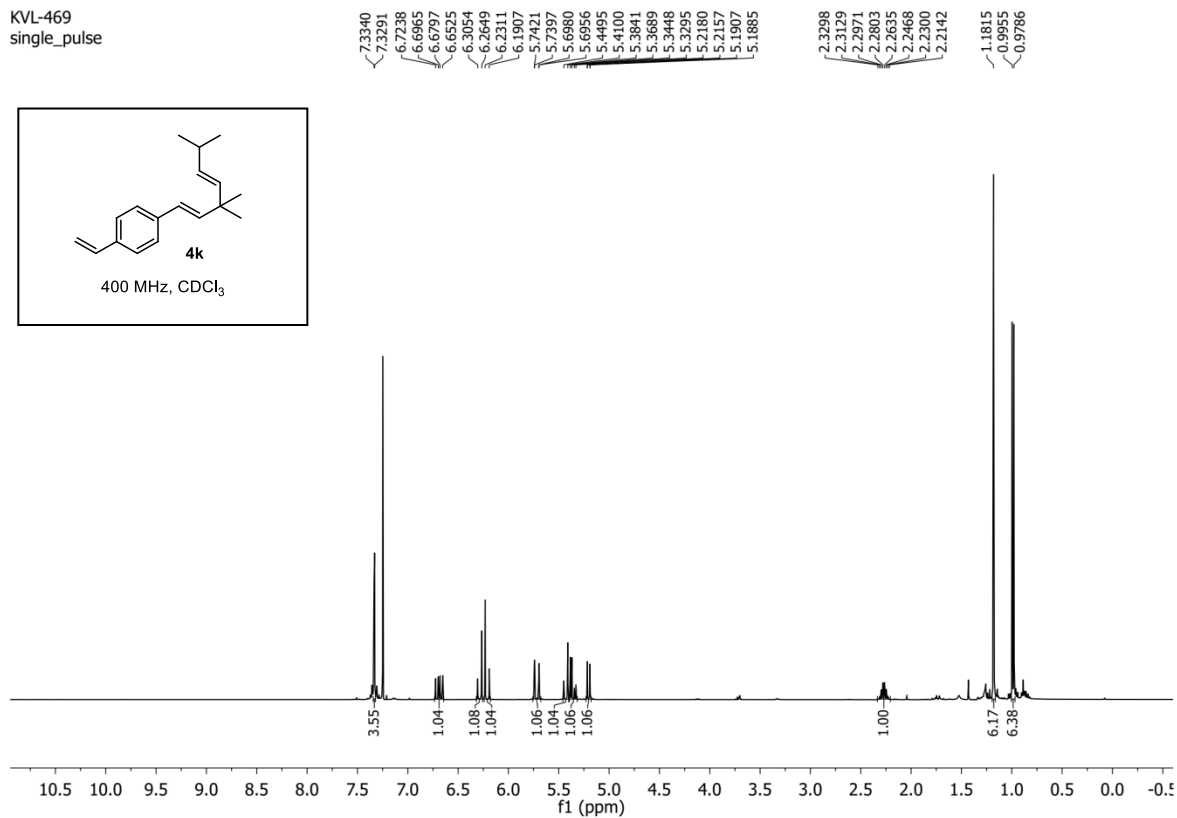

KVL-469  
single pulse decoupled gated NOE

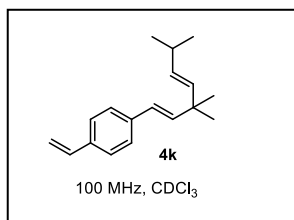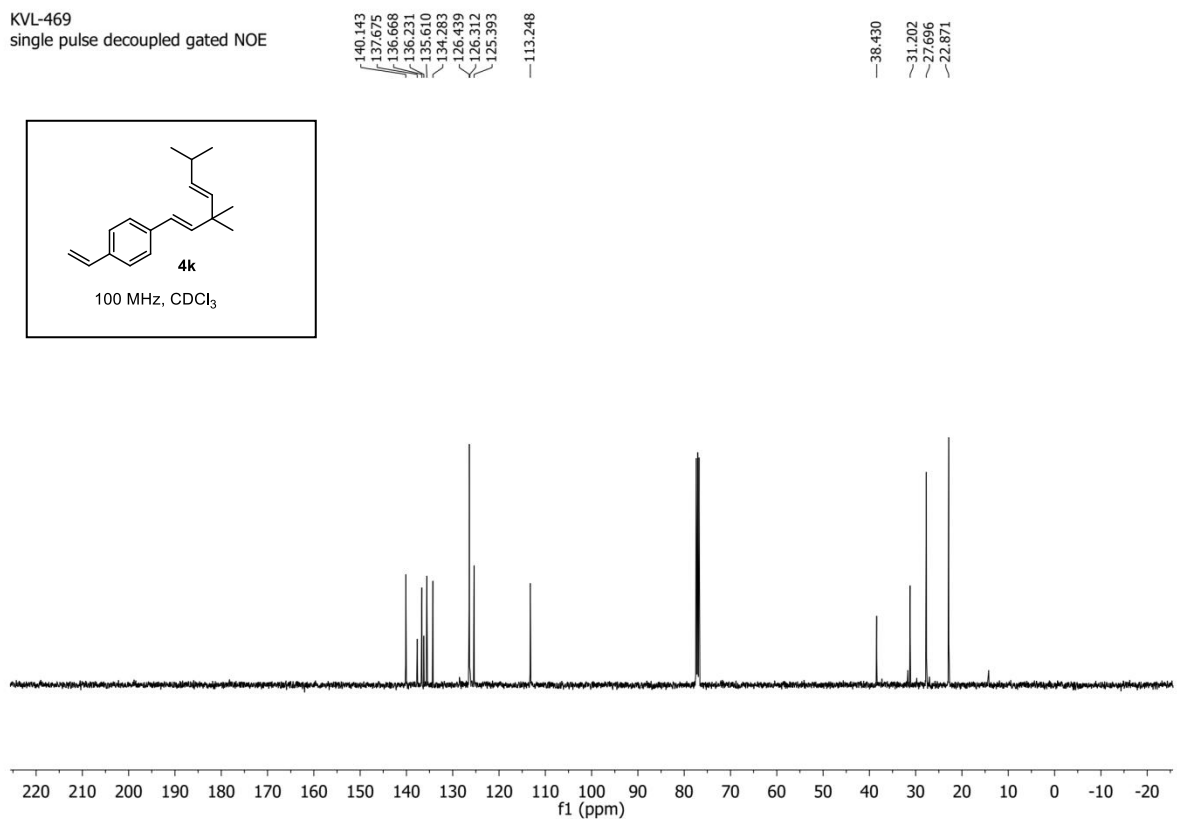

KVL-113B  
single\_pulse

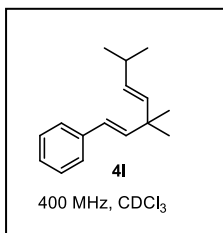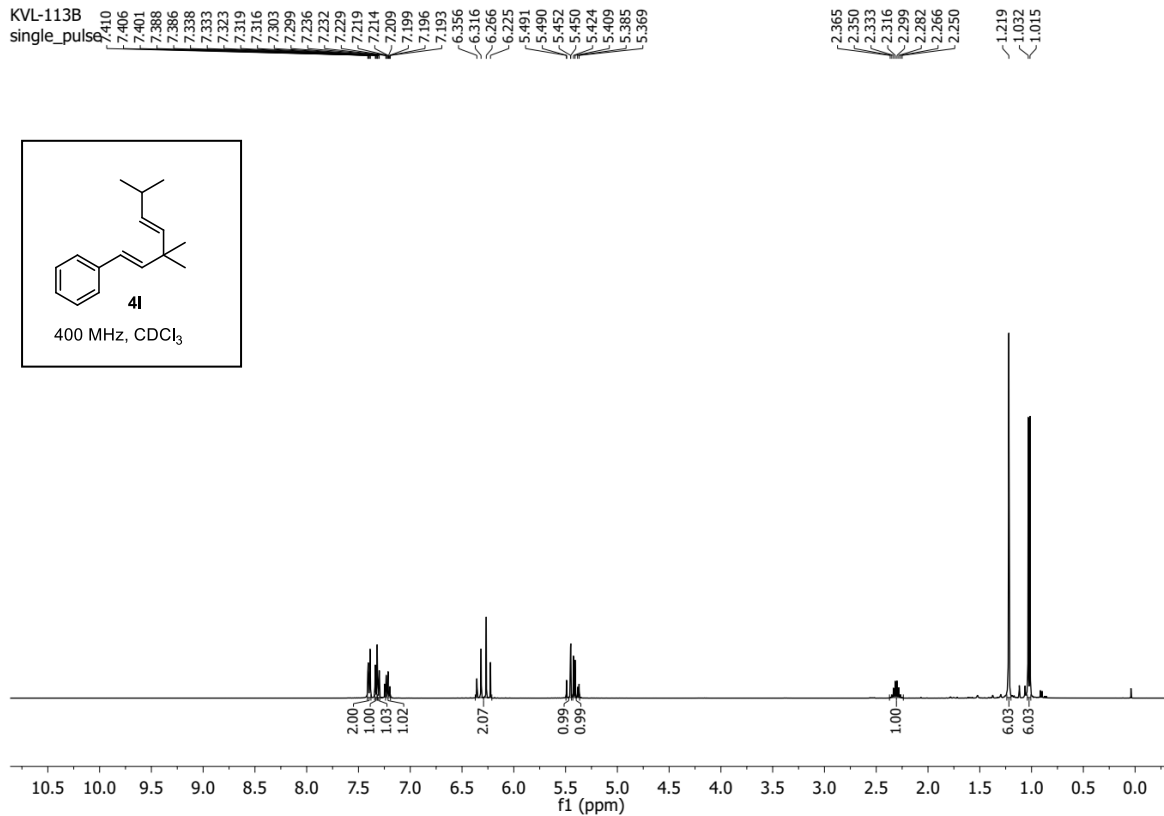

KVL-113B  
single pulse decoupled gated NOE

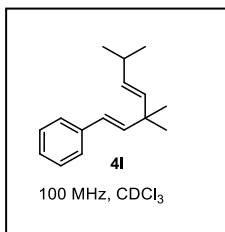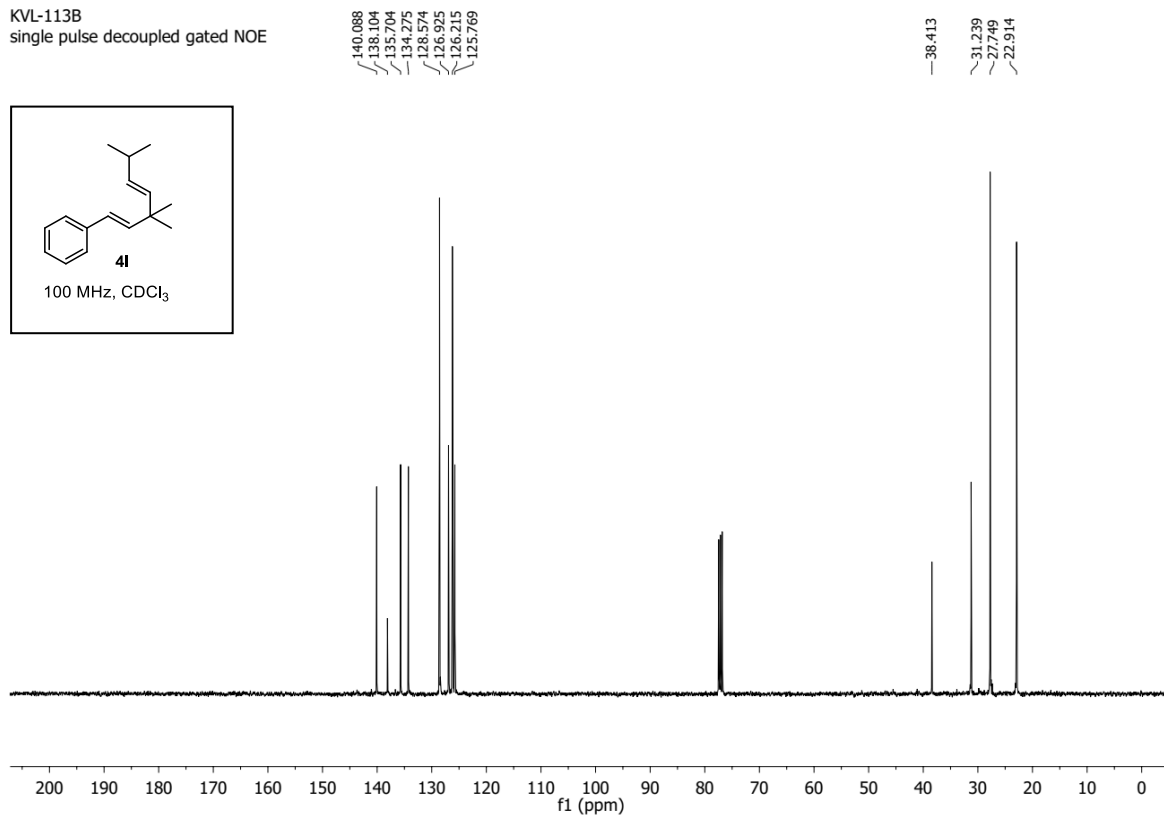

KVL-429  
single\_pulse

7.2700  
7.2656  
7.2612  
7.2344  
7.2153  
7.1961  
7.1558  
7.1524  
7.1488  
7.1365  
7.1330  
7.1295  
7.1091  
7.1044  
7.1013  
7.0900  
7.0867  
7.0822  
6.2842  
6.2437  
6.2297  
6.1894  
5.4490  
5.4090  
5.3879  
5.3729  
5.3486  
5.3336

2.4904  
2.3341  
2.3140  
2.3010  
2.2845  
2.2679  
2.2513  
2.2349  
2.2183  
1.1831  
1.0007  
0.9838

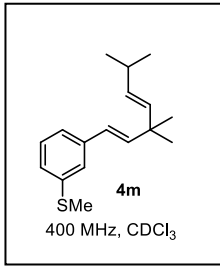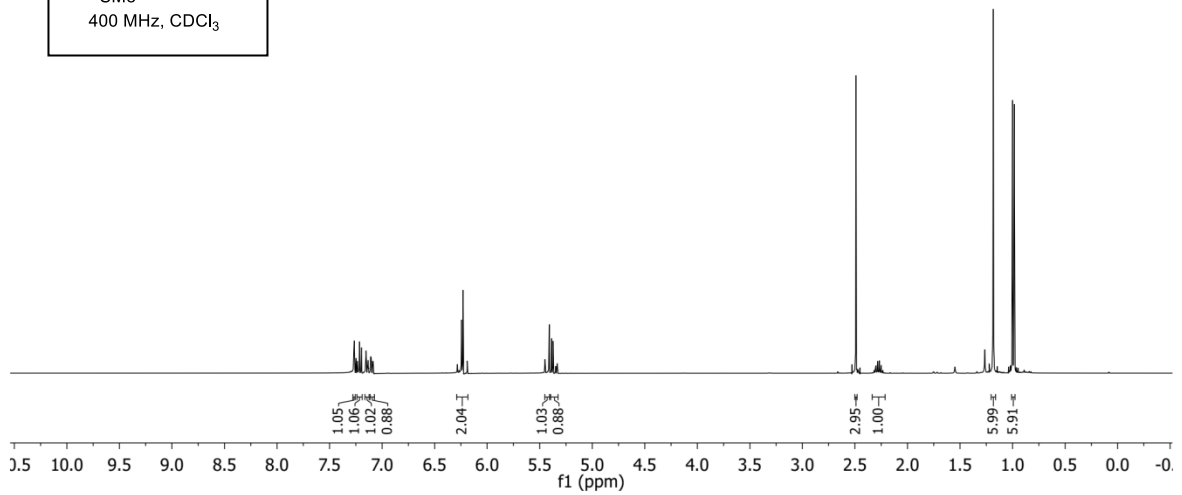

KVL-429  
single pulse decoupled gated NOE

140.788  
138.700  
138.567  
135.492  
134.361  
128.964  
125.270  
125.187  
124.593  
123.140

38.441  
31.195  
27.668  
22.860  
16.076

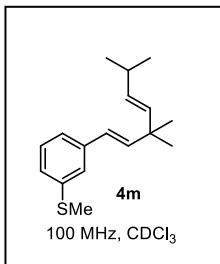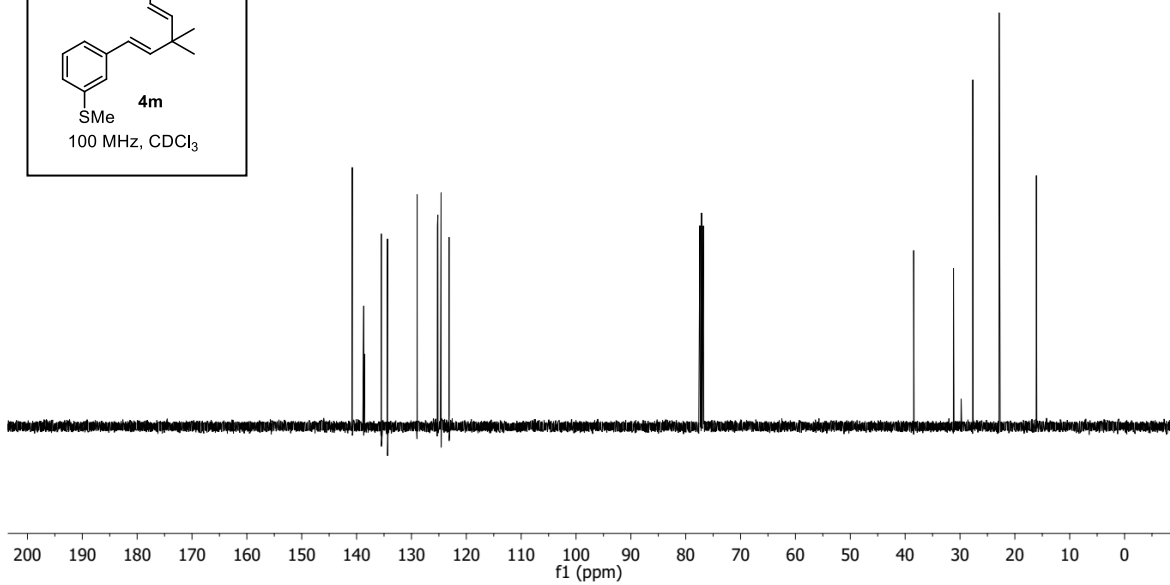

KVL-459  
single\_pulse

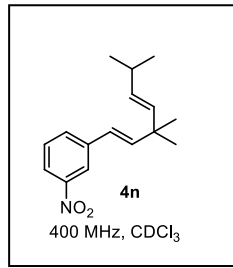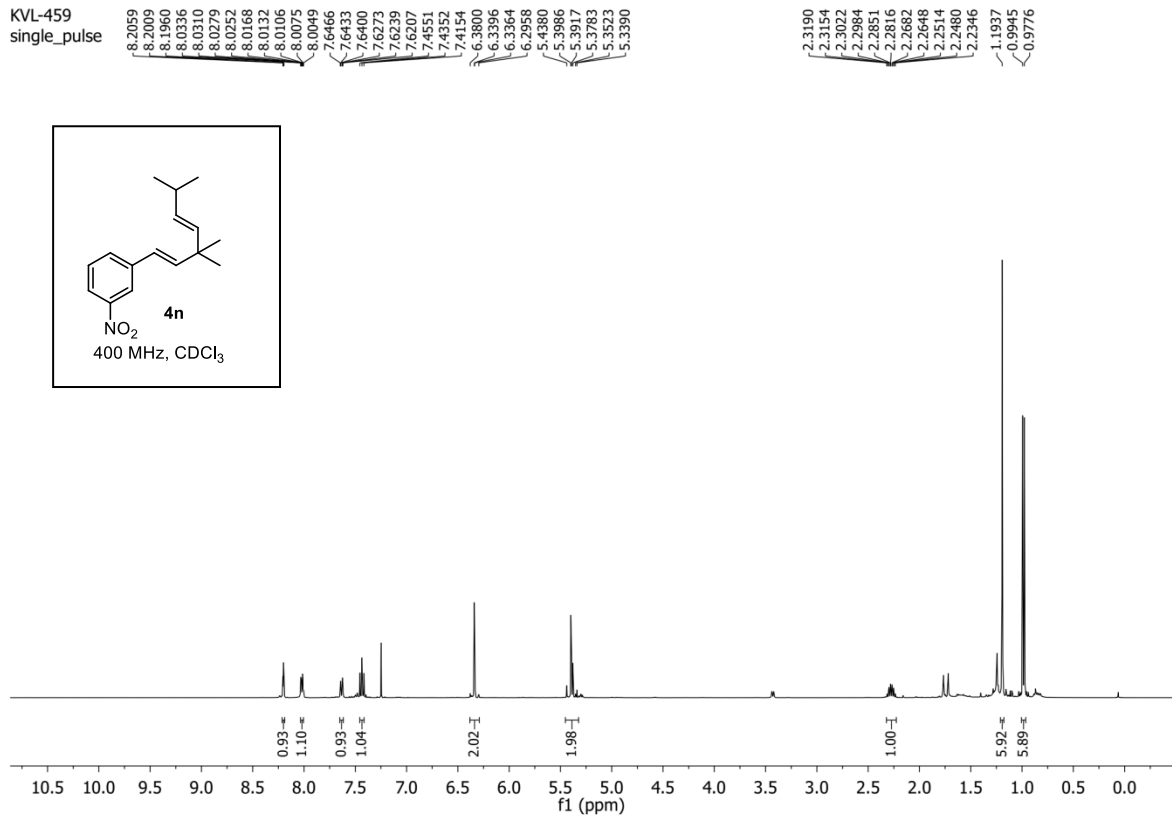

KVL-459  
single pulse decoupled gated NOE

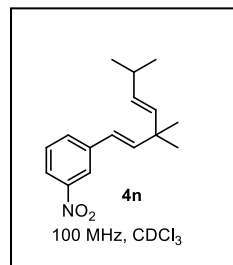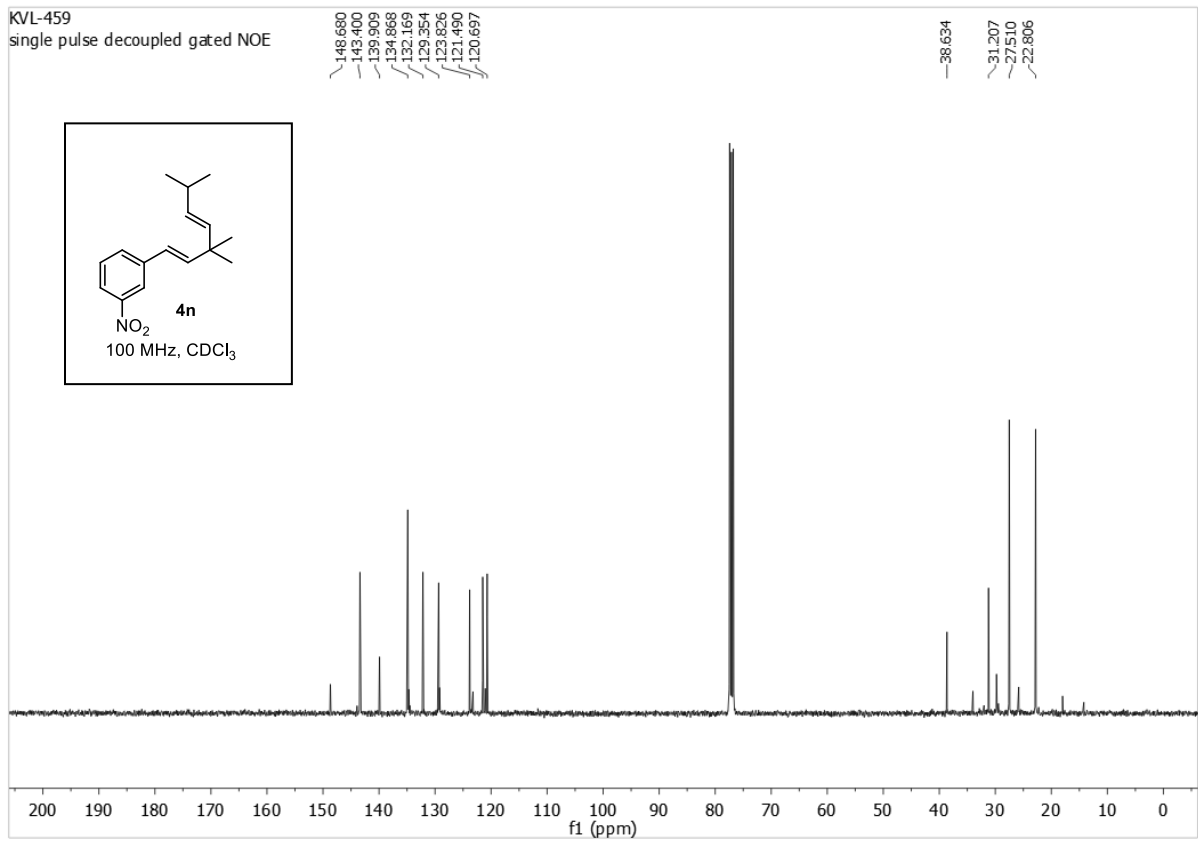



KVL-103  
single\_pulse

7.9290  
7.9251  
7.9211  
7.7663  
7.7623  
7.7593  
7.7470  
7.7430  
7.7401  
7.5534  
7.5501  
7.5471  
7.5341  
7.5307  
7.5280  
7.3863  
7.3870  
7.3477  
5.4387  
5.3992  
5.3812  
5.3665  
5.3418  
5.3271

2.5955  
2.3207  
2.3040  
2.2872  
2.2707  
2.2547  
2.2383  
2.2217  
2.2050  
1.1795  
0.9850  
0.9681

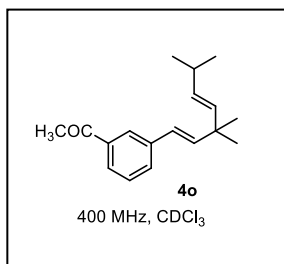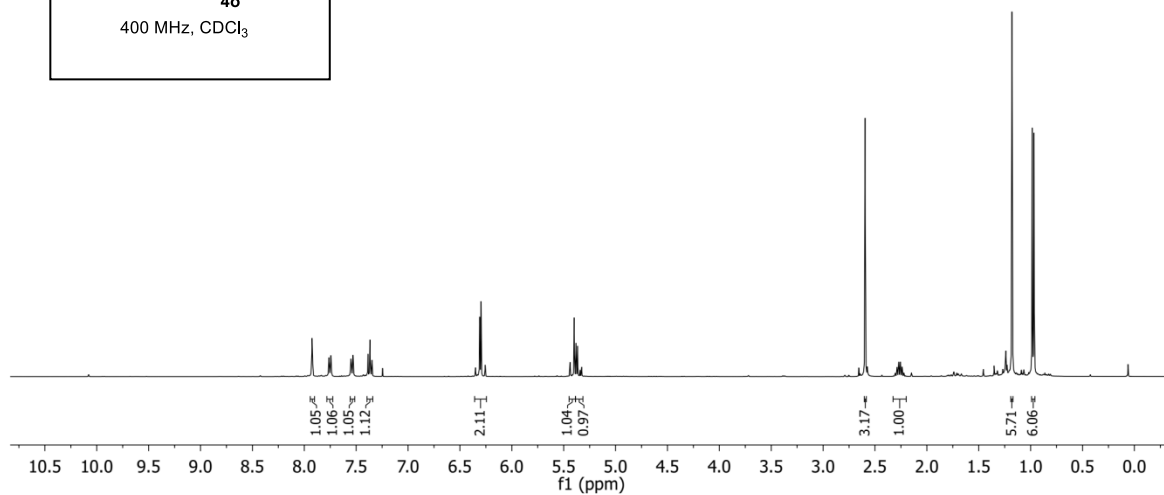

KVL-103  
single pulse decoupled gated NOE

198.084

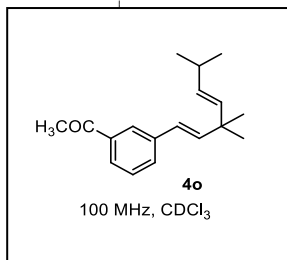

141.5468  
138.5867  
137.4319  
135.2767  
134.4955  
130.7357  
128.7472  
126.8204  
125.8648  
124.9035

38.5013  
31.1878  
27.6198  
26.7934  
22.8332

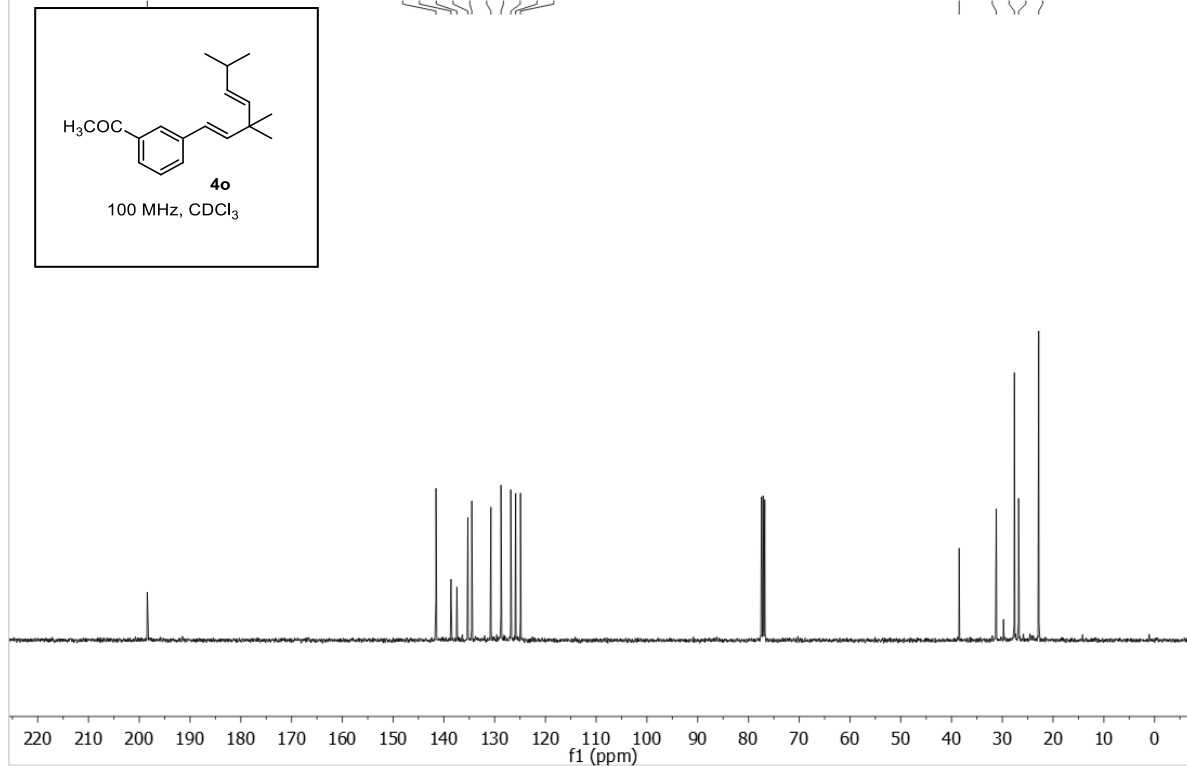

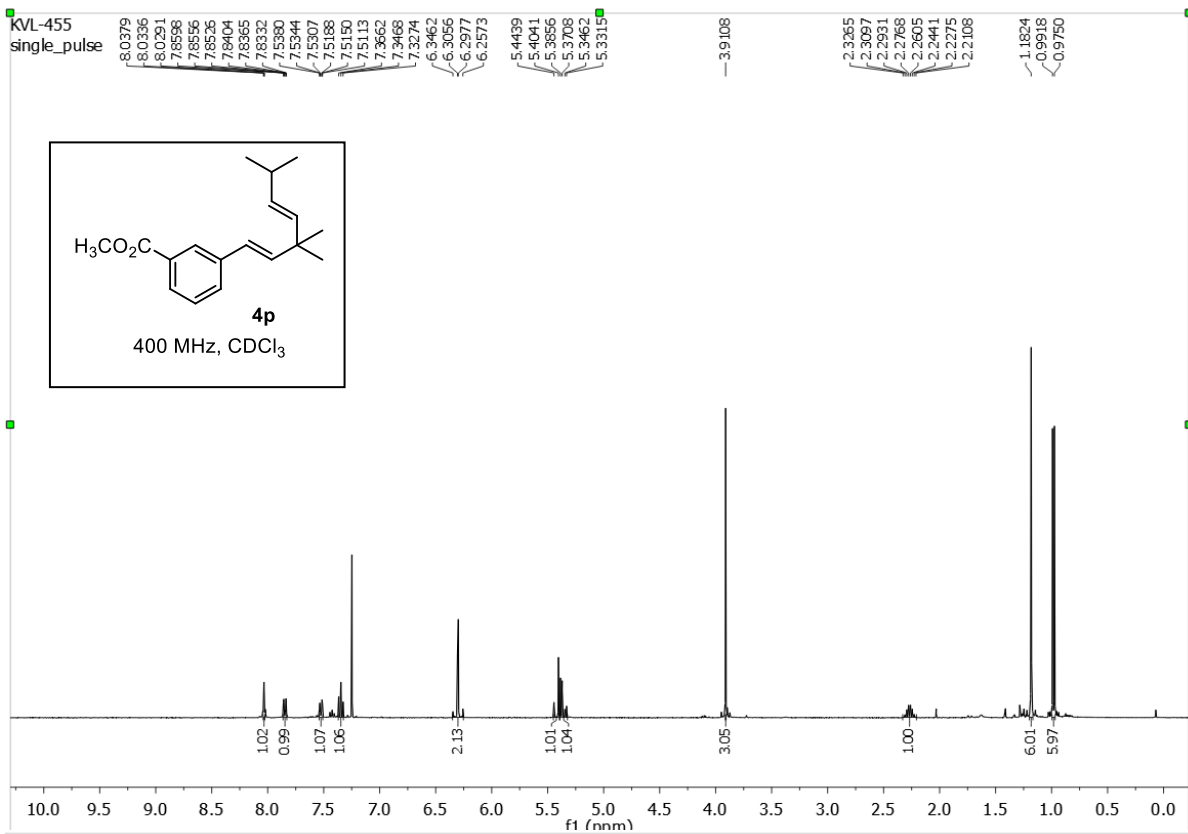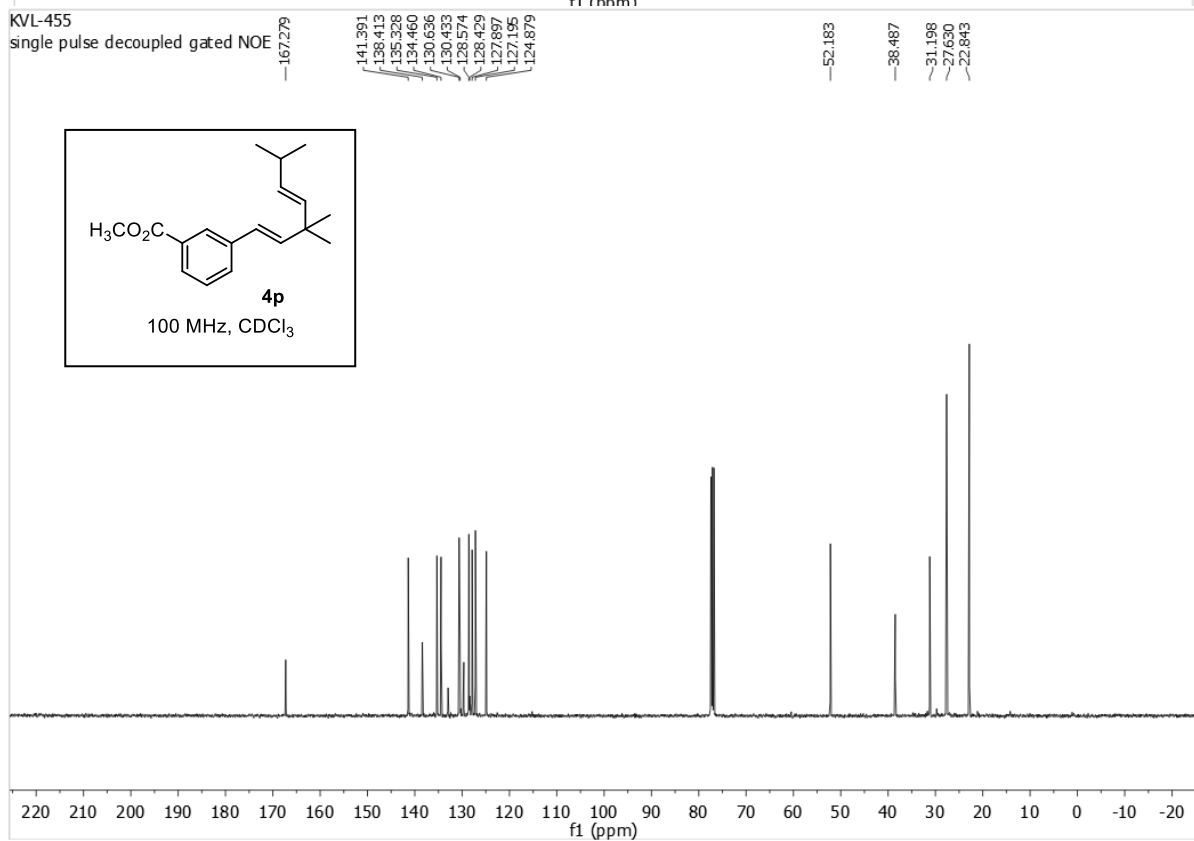

KVL-103  
single\_pulse

7.6117  
7.5363  
7.5175  
7.4526  
7.4333  
7.4125  
7.3934  
7.3743  
6.3630  
6.3225  
6.3092  
6.2687  
5.4685  
5.4290  
5.4155  
5.4011  
5.3761  
5.3618

2.3540  
2.3372  
2.3204  
2.3037  
2.2888  
2.2721  
2.2554  
2.2386  
1.2096  
1.0189  
1.0020

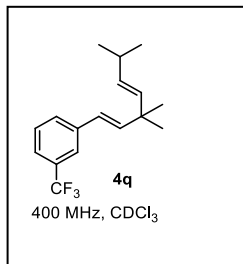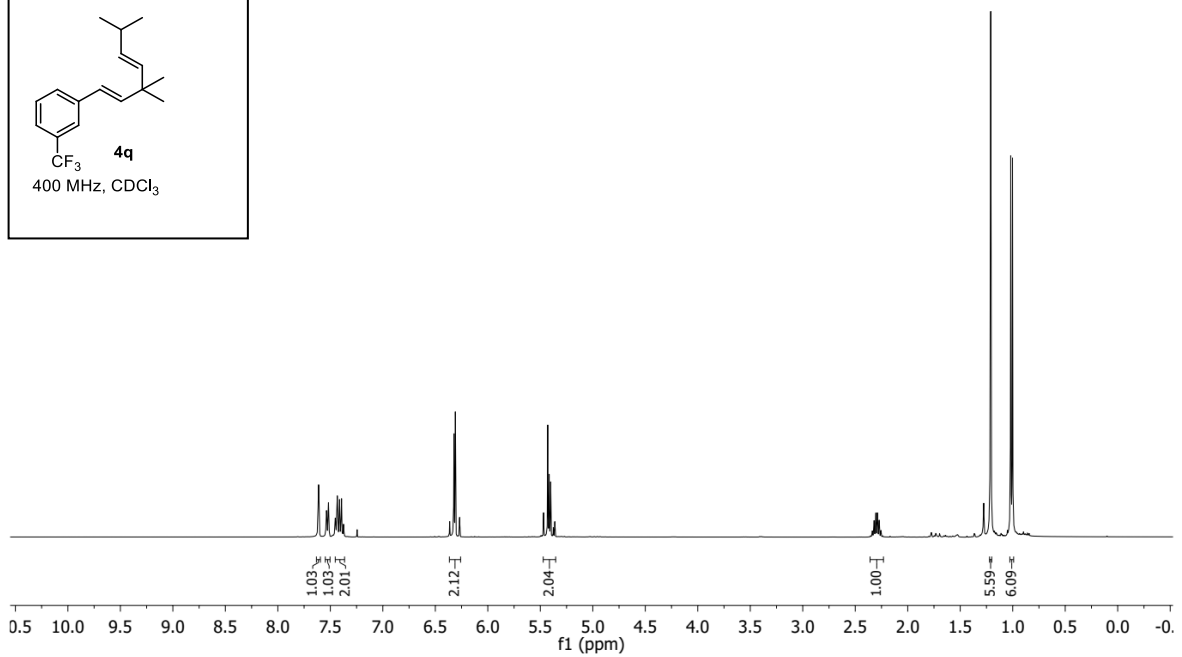

KVL-103  
single pulse decoupled gated NOE

141.138  
138.874  
135.178  
134.633  
131.434  
131.116  
130.798  
130.480  
129.344  
128.911  
125.692  
124.633  
123.454  
123.424  
123.388  
123.354  
122.898  
122.863  
122.826  
122.790

38.523  
31.222  
27.574  
22.817

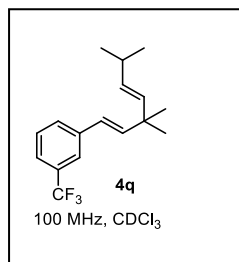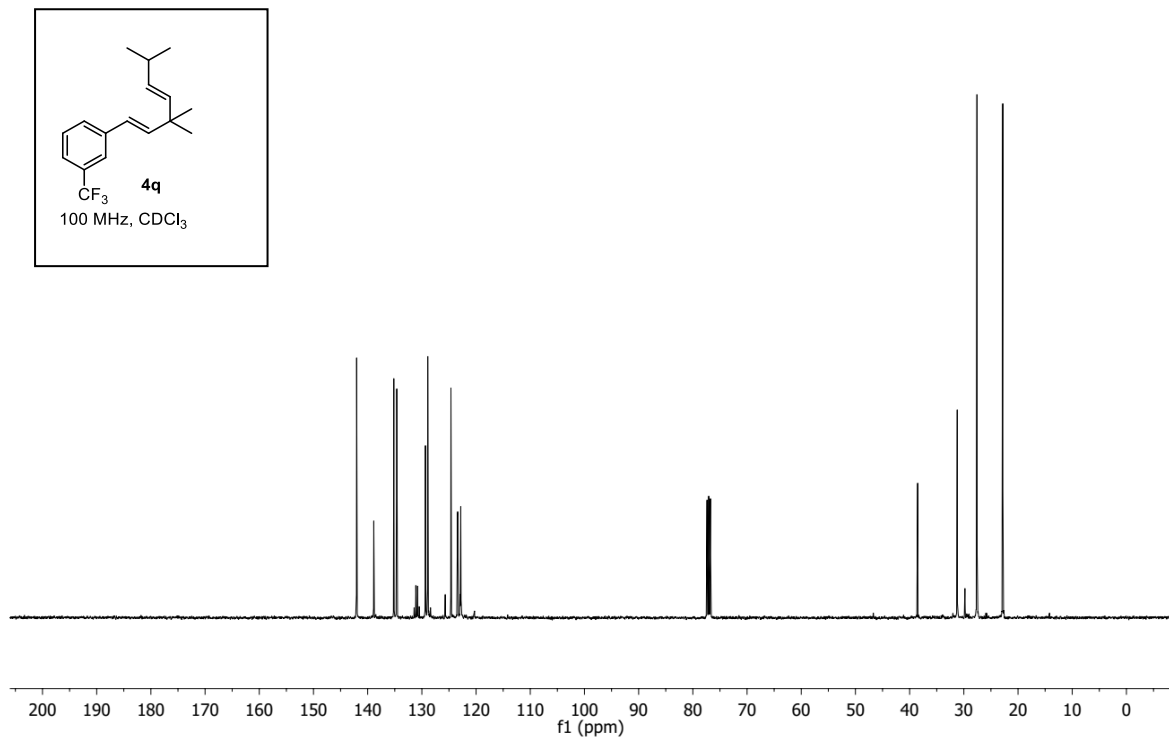

KVL-97-1H/1

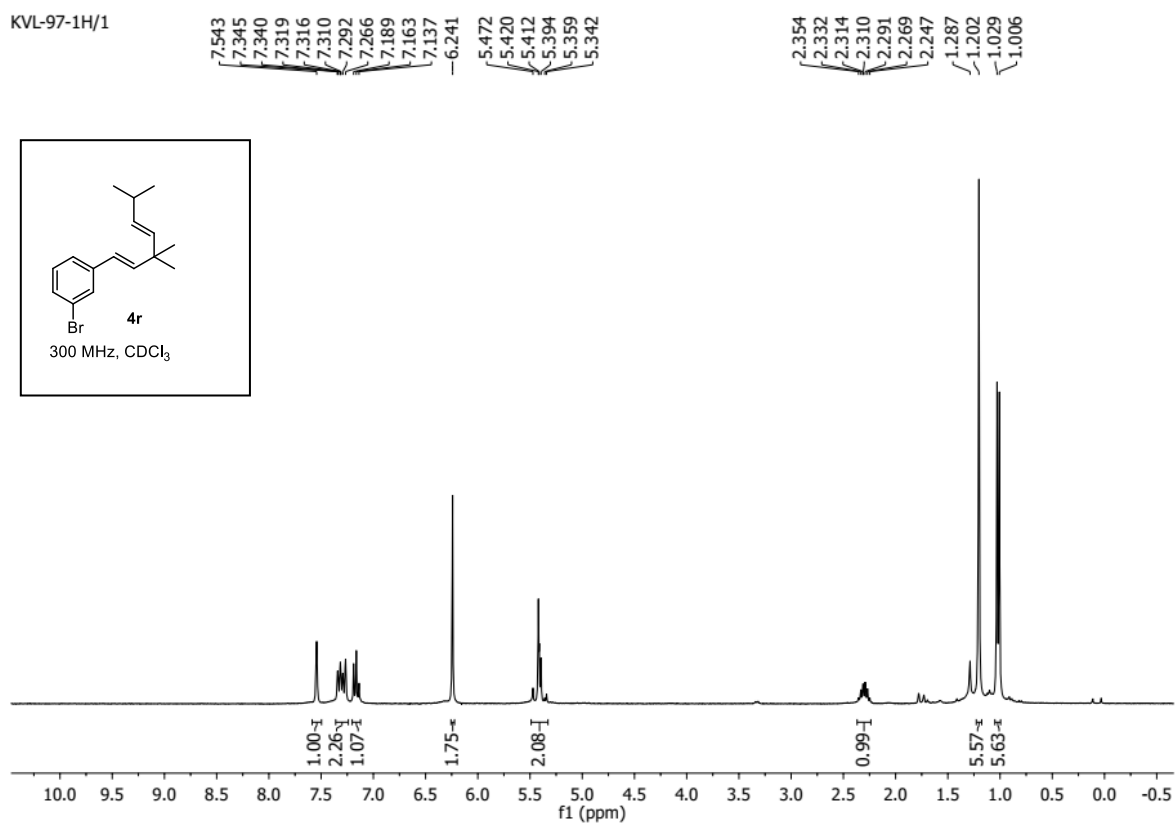

KVL-97  
single pulse decoupled gated NOE

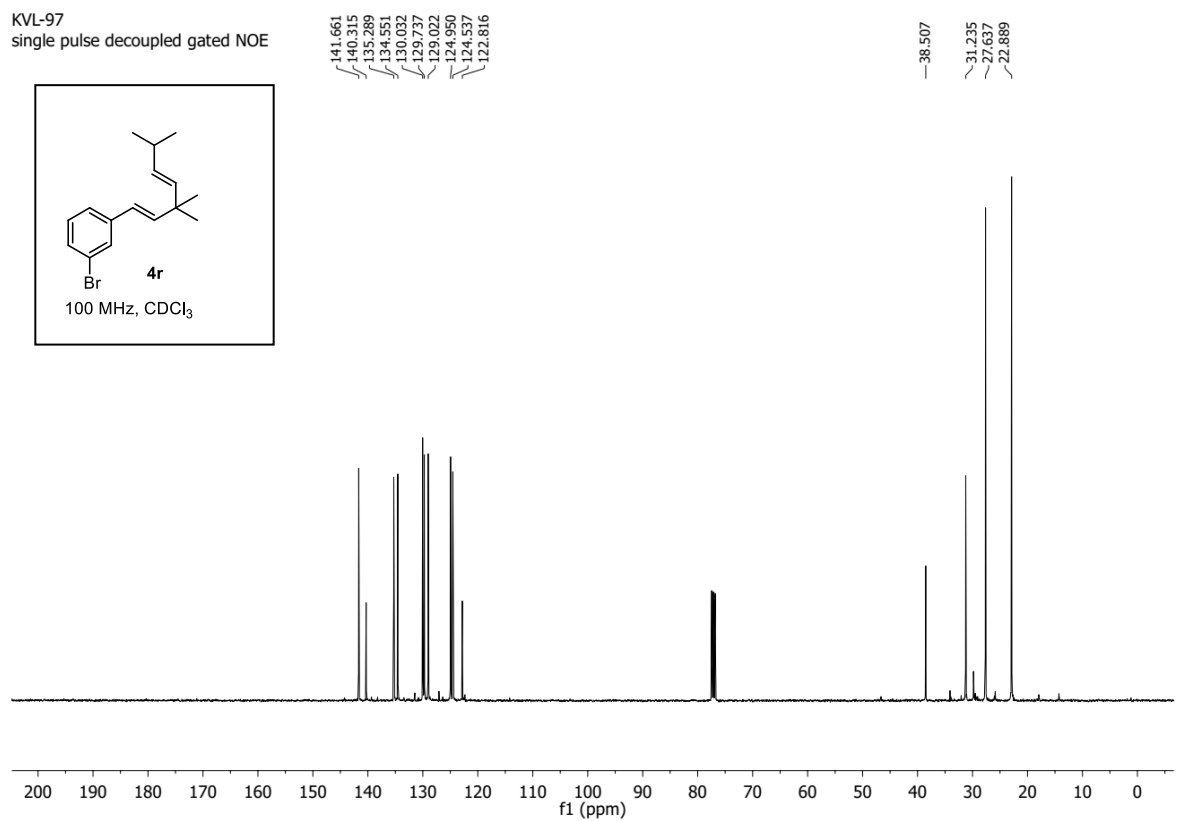

KVL-83  
single\_pulse

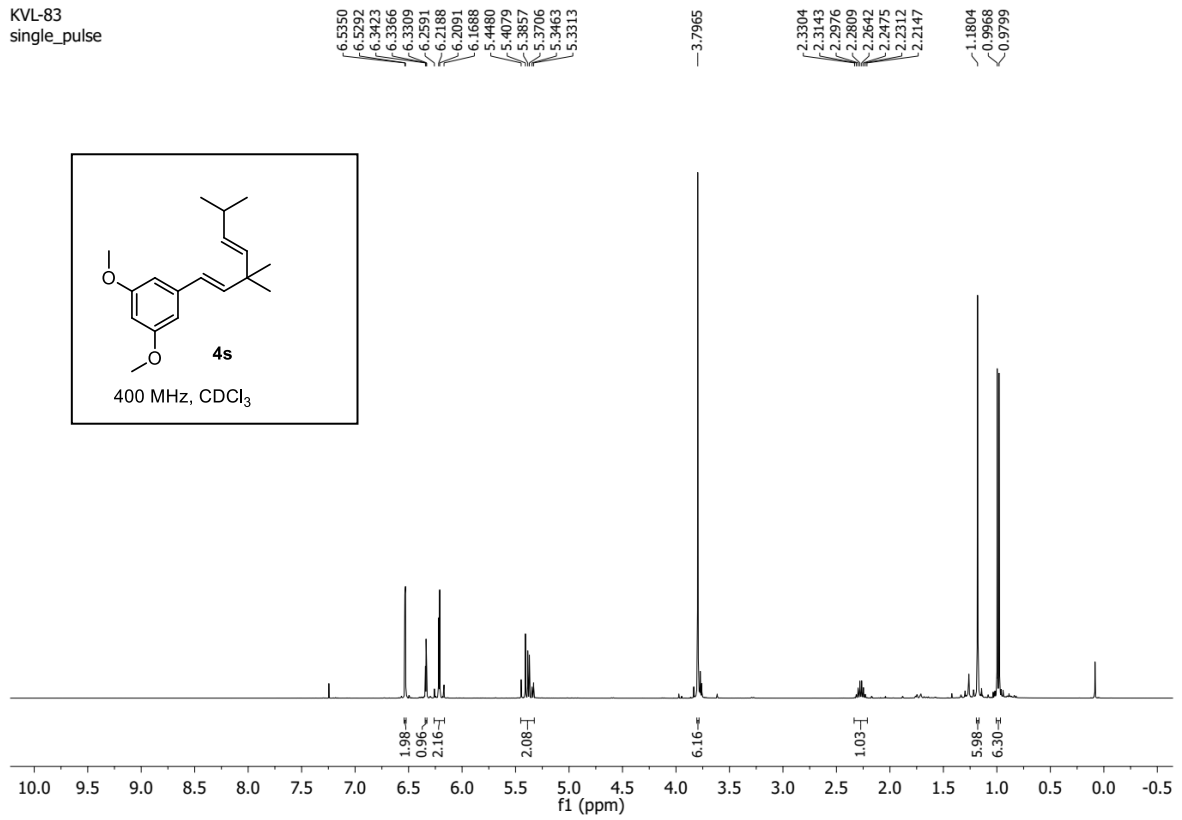

KVL-83  
single pulse decoupled gated NMR

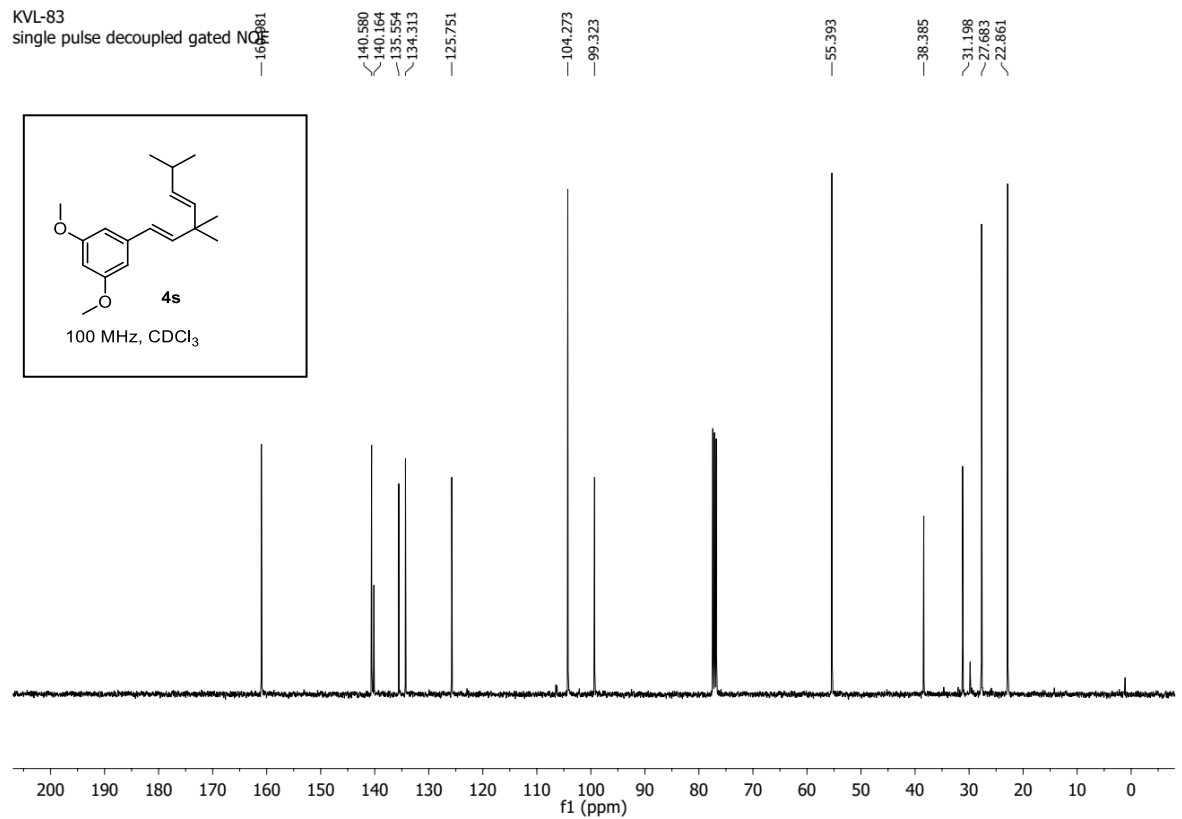

KVL-90D-1H/2

7.8402  
7.8319  
7.8348  
7.8048  
7.7690  
7.6823  
7.6539  
7.5222  
7.5002  
7.4761  
7.4524  
7.4341  
6.5703  
6.5165  
6.4417  
6.3879  
5.5794  
5.5269  
5.5047  
5.4853  
5.4524  
5.4330

2.4458  
2.4232  
2.4006  
2.3793  
2.3578  
2.3354  
2.3129  
2.2916  
1.3002  
1.0919  
1.0694

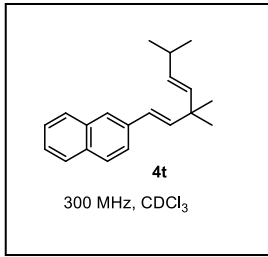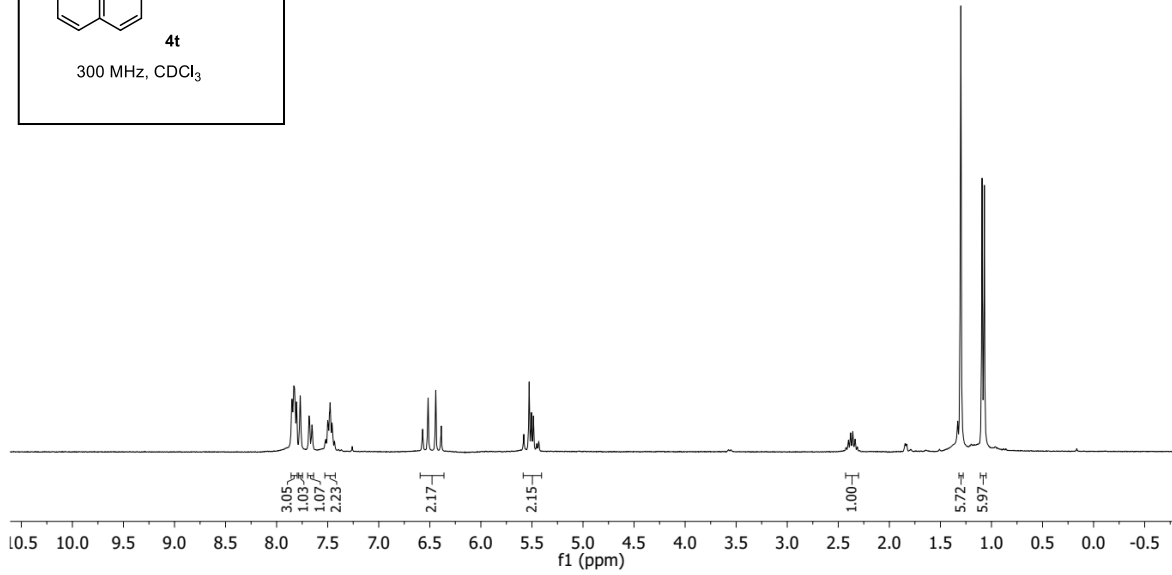

KVL-100  
single pulse decoupled gated NOE

140.592  
135.722  
135.600  
134.392  
133.903  
132.849  
128.167  
127.960  
127.769  
126.240  
125.988  
125.727  
125.566  
123.886

38.596  
31.310  
27.847  
22.985

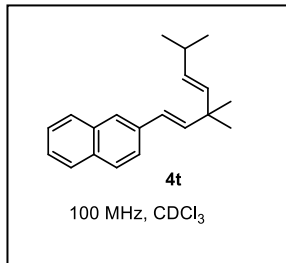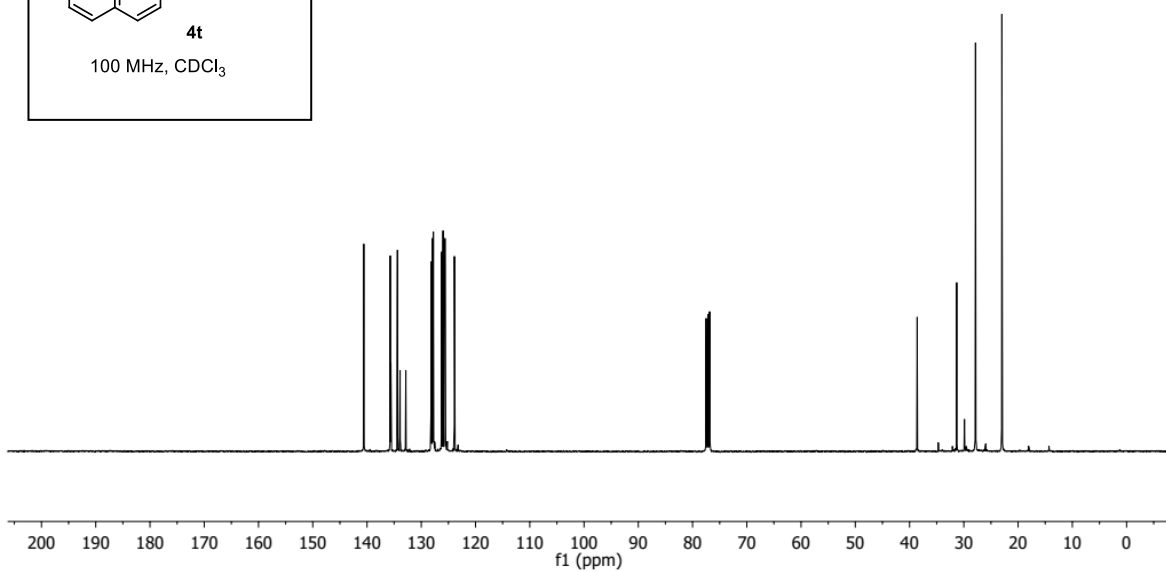

KVL-4-0RF  
single\_pulse

7.772  
7.468  
7.453  
7.448  
7.433  
7.433  
7.174  
7.170  
7.161  
7.156  
7.154  
7.151  
7.143  
7.141  
7.138  
7.136  
7.131  
7.113  
7.106  
7.108  
7.074  
7.059  
7.056  
7.040  
7.037  
7.032  
7.012  
7.001  
6.998  
6.995  
6.991  
6.974  
6.971  
6.961  
6.944  
6.921  
6.250  
5.447  
5.407  
5.385  
5.370  
5.346  
5.331

2.323  
2.309  
2.292  
2.275  
2.268  
2.252  
2.235  
2.208  
1.185  
0.989  
0.972

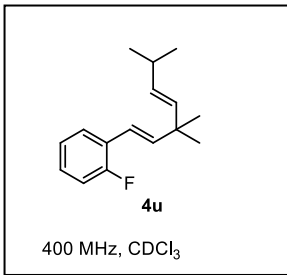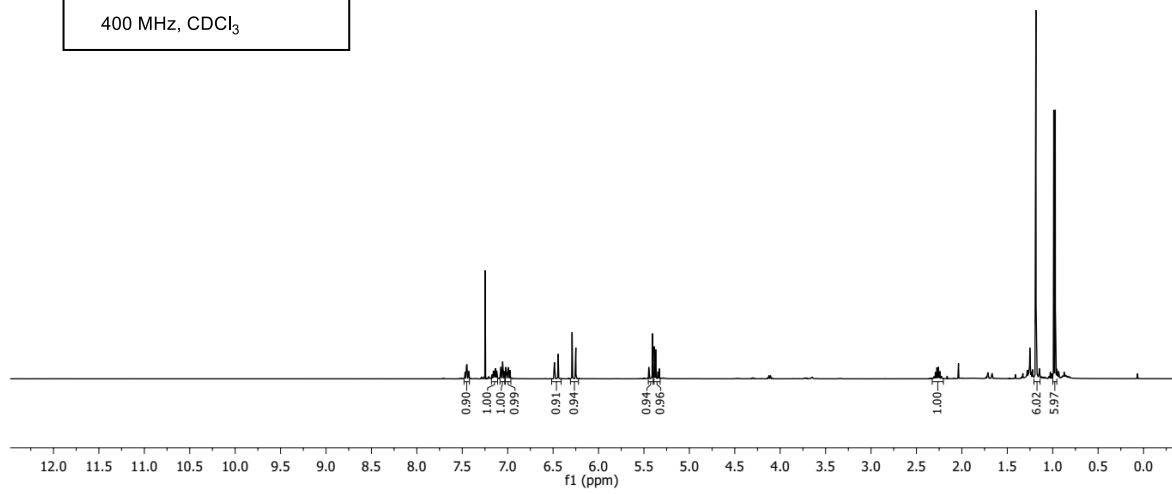

14-KVL-4-0-2/2  
KVL-4-0-2 13C NMR in CDCl3 scans 1300

160.398  
158.755  
141.916  
141.890  
134.861  
133.511  
132.529  
127.484  
126.457  
126.431  
125.278  
125.197  
123.480  
122.465  
117.485  
117.468  
115.181  
115.033  
38.202  
30.669  
27.053  
22.310

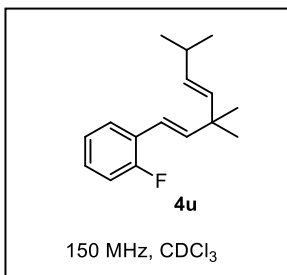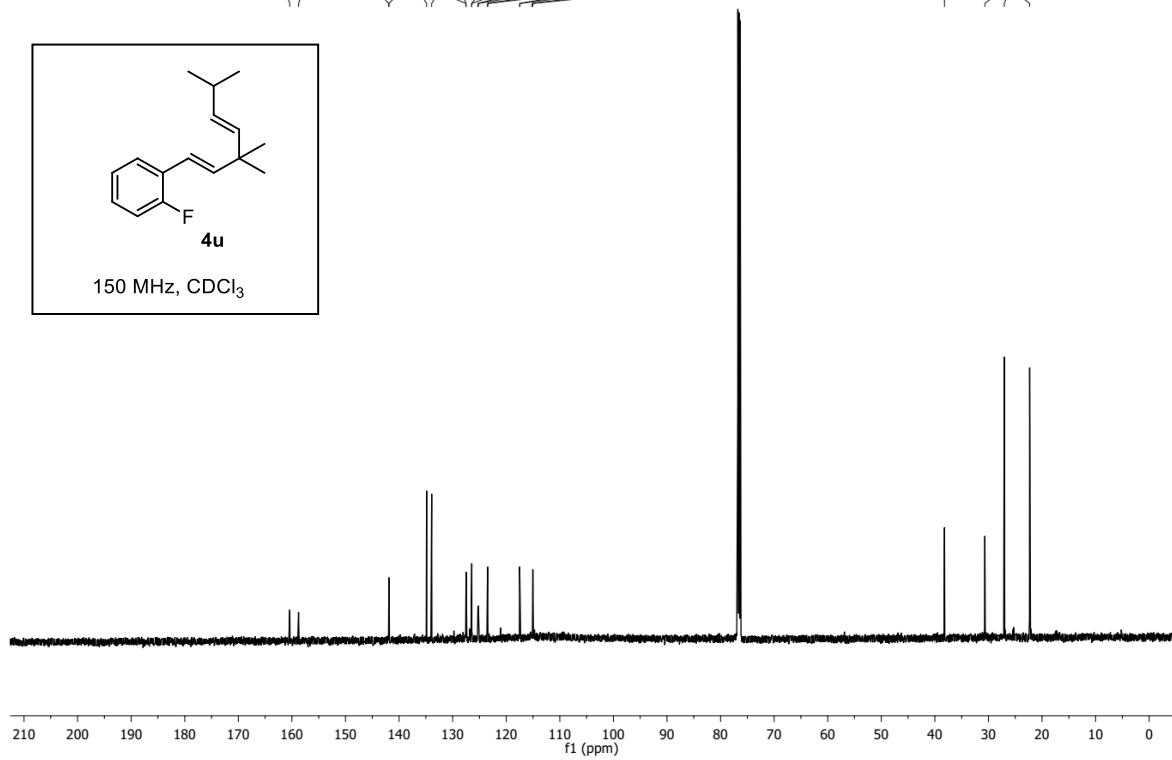

KVL-101  
single pulse

8.87494  
8.1465  
8.1292  
8.1259  
7.8687  
7.8649  
7.8515  
7.8469  
7.7721  
7.7516  
7.5989  
7.5820  
7.5308  
7.5468  
7.5338  
7.5298  
7.5263  
7.5145  
7.5095  
7.4975  
7.4949  
7.4913  
7.4777  
7.4741  
7.4544  
7.4356  
7.0957  
7.0560  
6.2808  
6.2411  
5.5827  
5.5432  
5.5414  
5.5045  
5.4888  
5.4652  
5.4494

2.4078  
2.3894  
2.3740  
2.3568  
2.3399  
2.3231  
2.3063  
2.2894  
1.3081  
1.0632  
1.0463

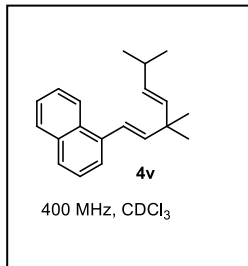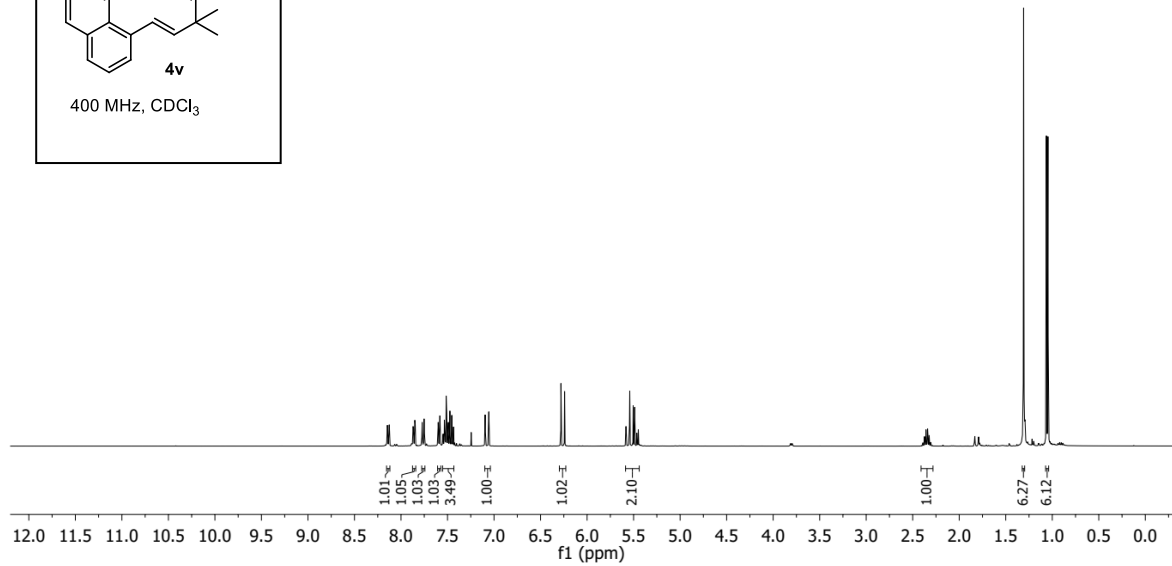

KVL-101  
single pulse decoupled gated NOE

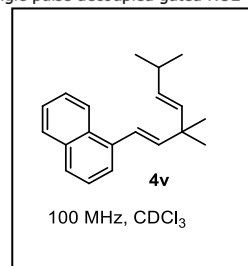

143.533  
136.031  
135.731  
134.525  
133.752  
131.448  
128.583  
127.328  
125.864  
125.769  
125.720  
124.045  
123.649  
123.045

38.923  
31.288  
27.903  
22.968

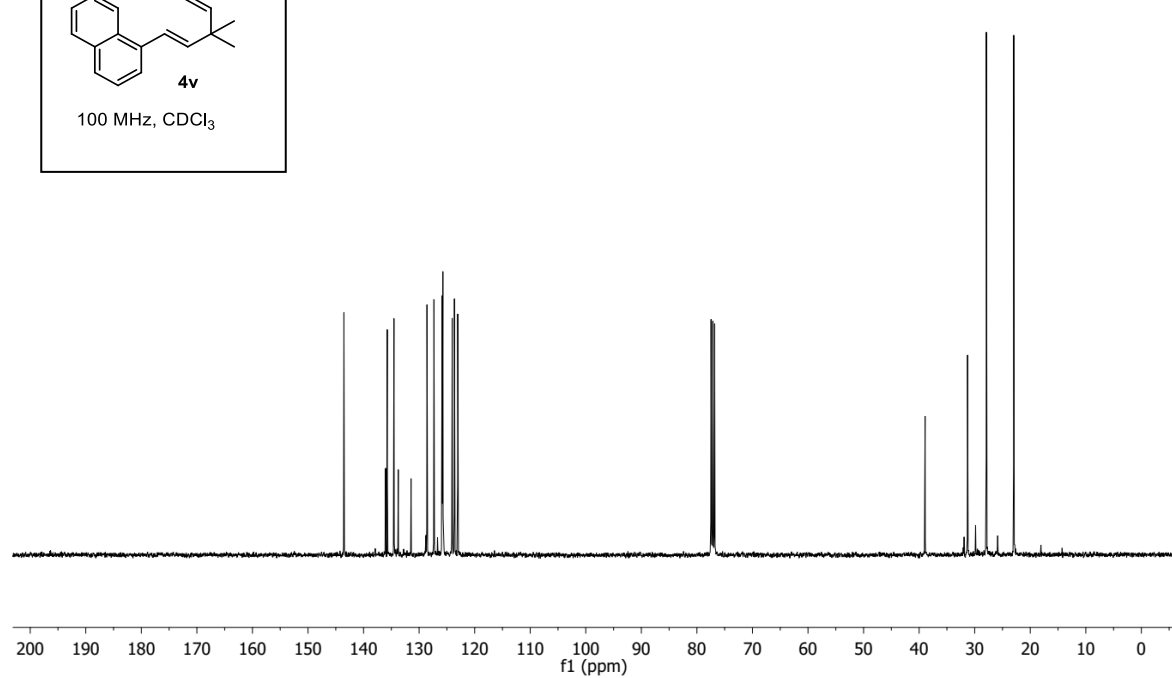



KVL-403  
single\_pulse

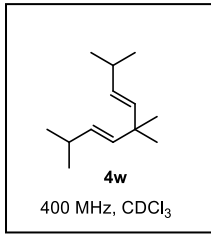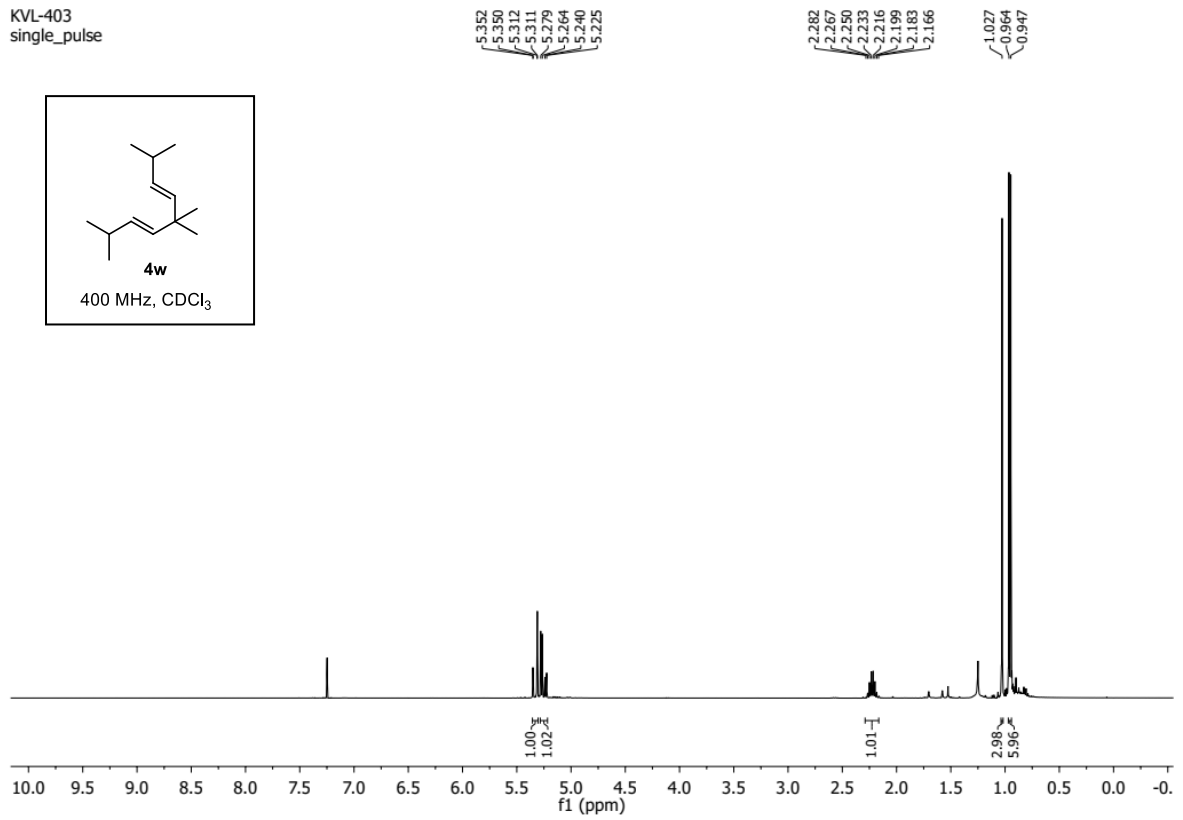

KVL-403  
single pulse decoupled gated NOE

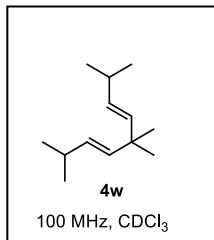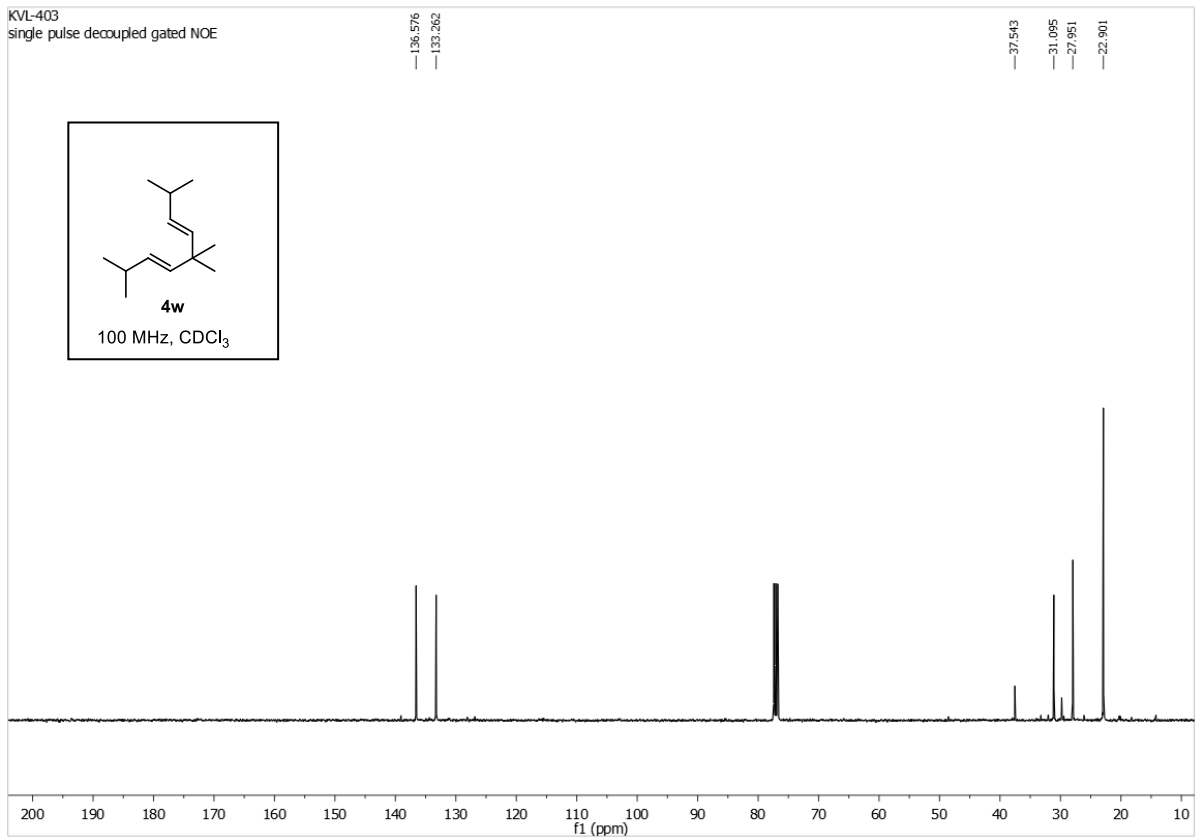

KVL-424  
single\_pulse

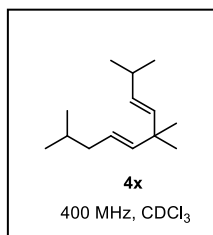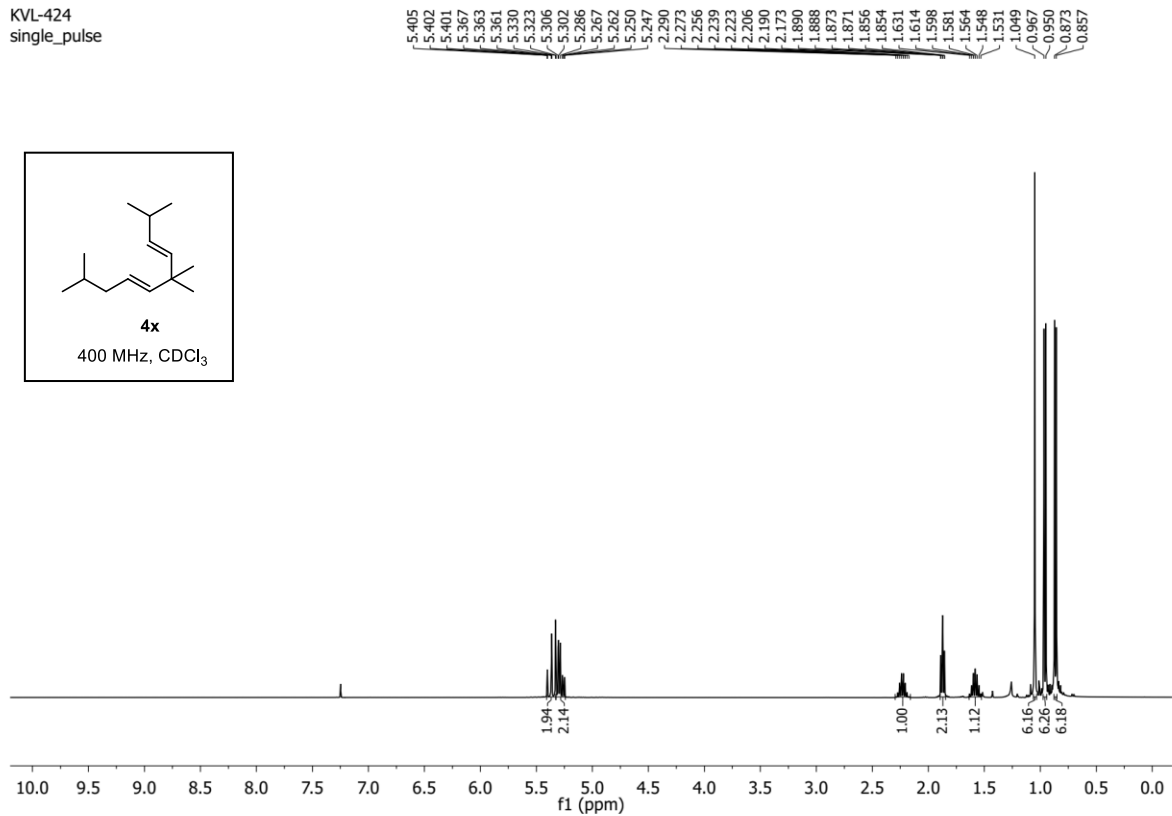

KVL-424  
single pulse decoupled gated NOE

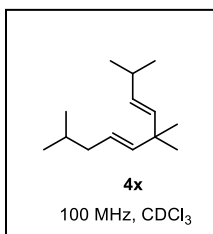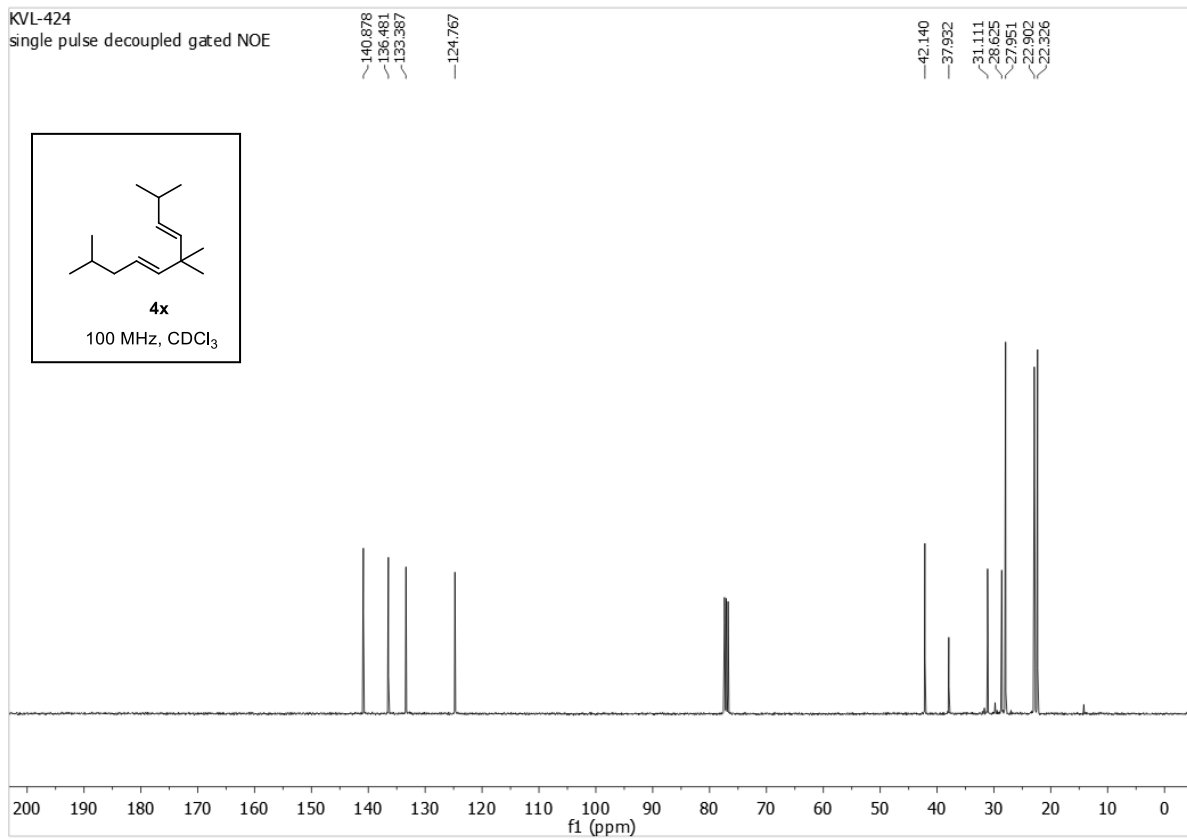

KVL-435  
single\_pulse

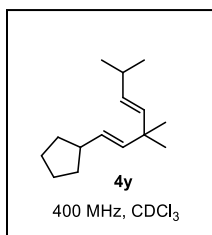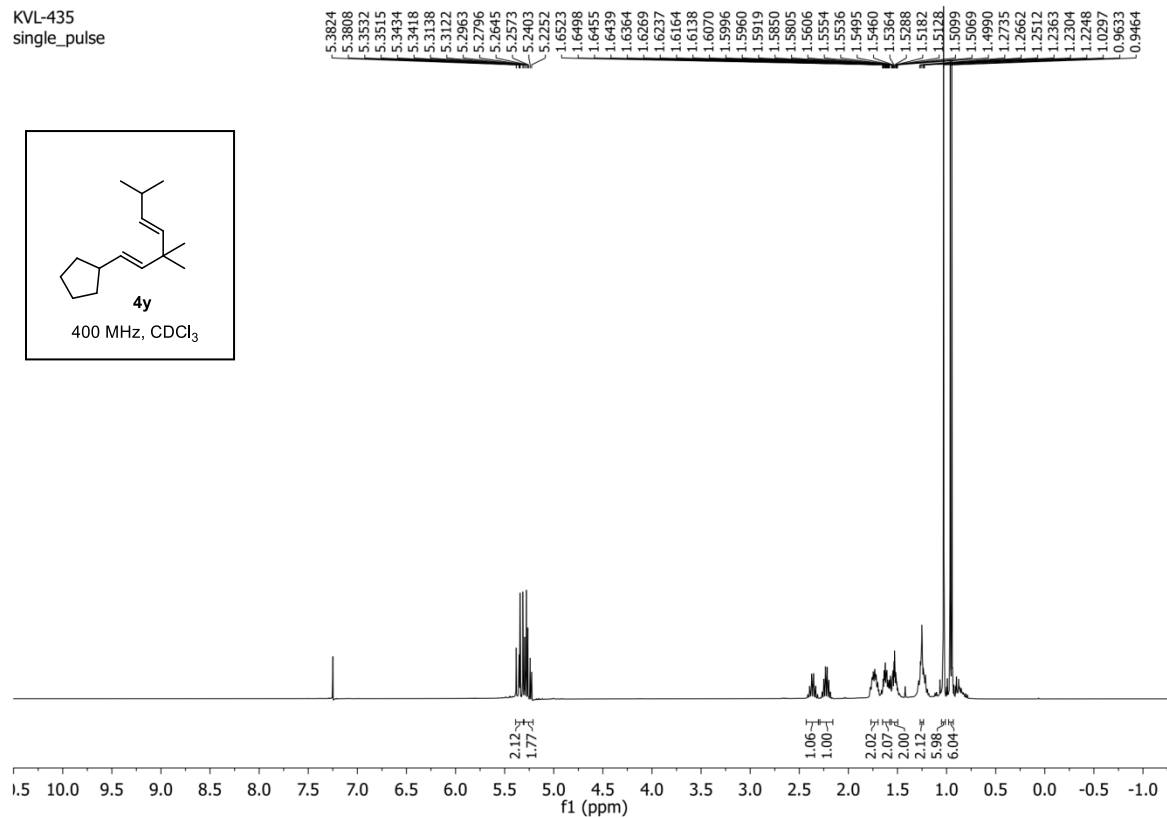

KVL-435  
single pulse decoupled gated NOE

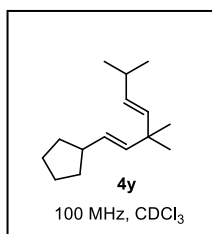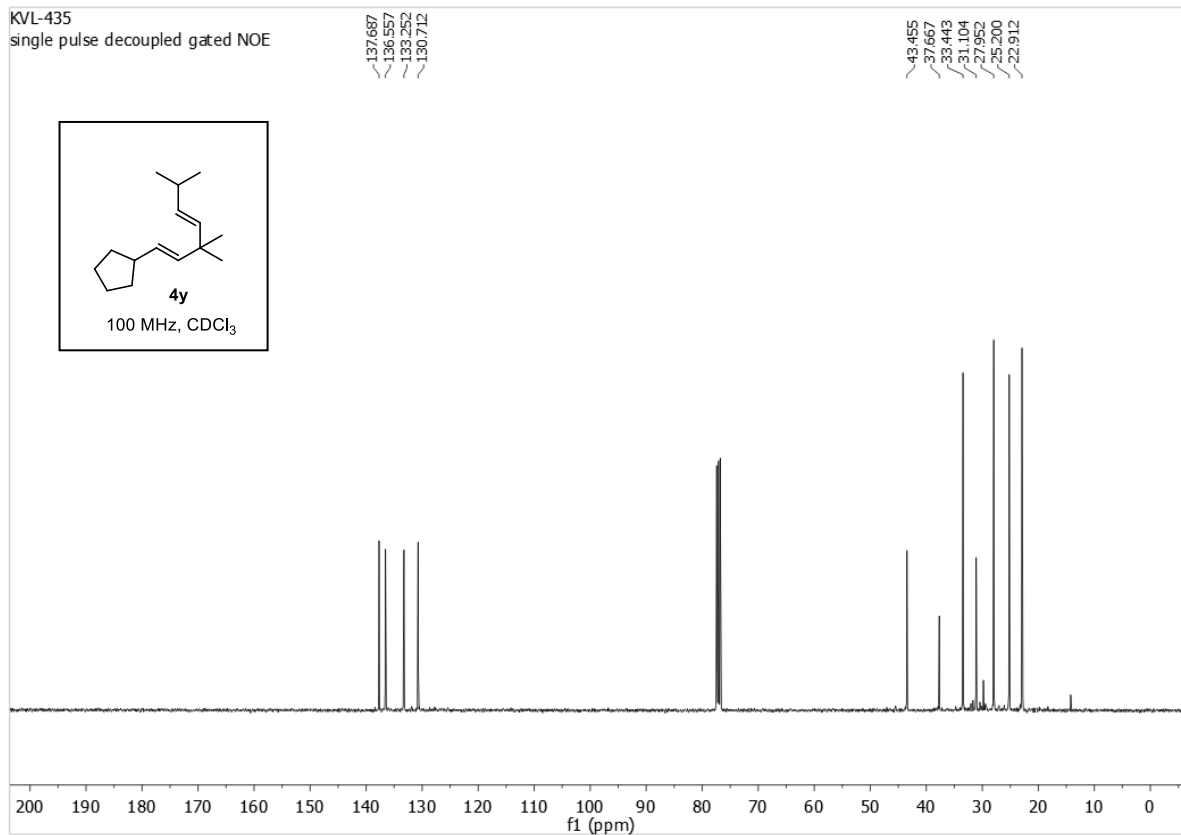

21-KVL-413/1  
KVL-413 1H-NMR in CDCl<sub>3</sub>

7.365  
7.361  
7.355  
7.351  
7.346  
7.341  
7.338  
7.033  
7.019  
7.005  
6.325  
6.321  
6.298  
6.293  
6.176  
6.149  
5.478  
5.451  
5.316  
5.311  
5.303  
5.298  
5.290  
5.285  
5.277  
5.272  
5.171  
5.162  
5.149  
2.189  
2.188  
2.176  
2.165  
2.153  
2.022  
2.010  
1.998  
1.984  
1.726  
1.629  
1.539  
1.525  
1.511  
1.377  
1.366  
1.356  
1.344  
1.334  
1.225  
1.045  
1.040  
1.034  
1.029

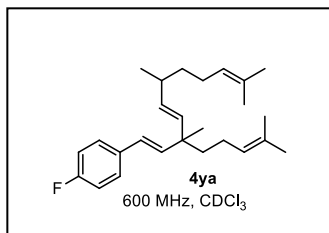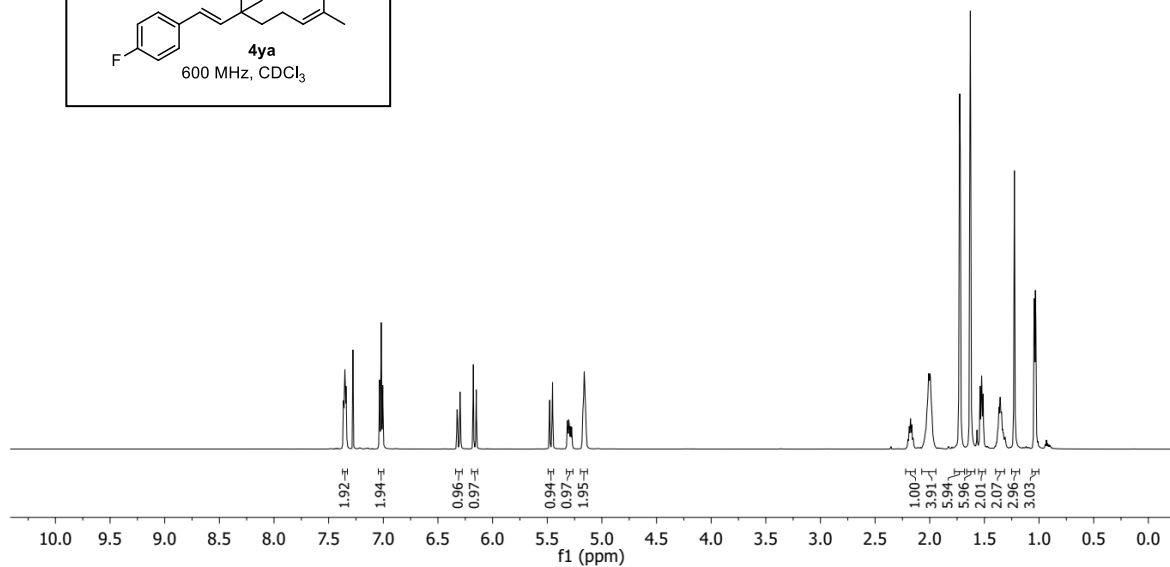

21-KVL-413/2  
KVL-413 13C NMR

162.265  
161.638  
133.828  
133.614  
133.301  
133.379  
133.356  
133.751  
133.829  
133.616  
133.591  
130.725  
130.682  
130.683  
127.024  
126.972  
125.035  
124.481  
124.366  
114.897  
114.755

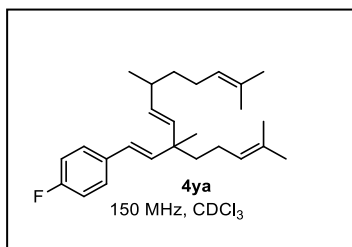

41.320  
41.271  
41.198  
36.948  
36.360  
36.306  
25.550  
25.533  
25.291  
25.272  
23.679  
23.667  
22.917  
22.888  
20.728  
20.669  
17.254  
17.240  
17.172

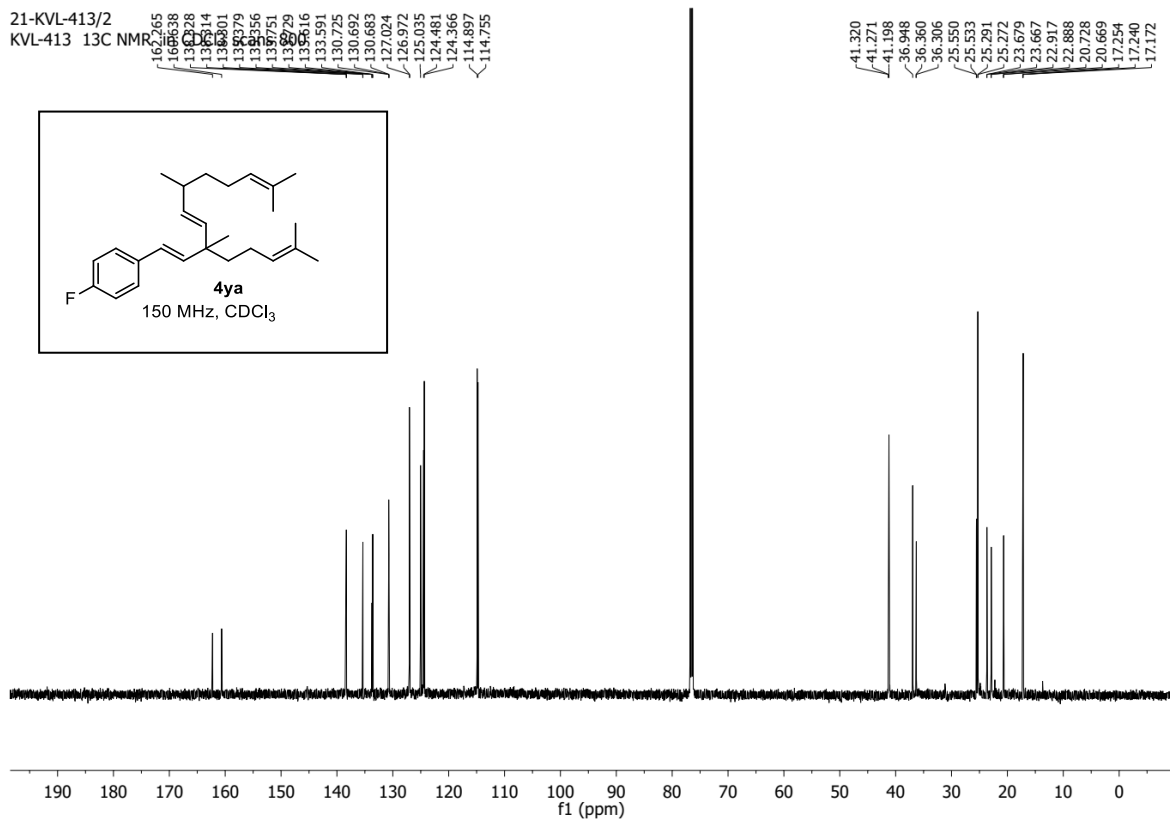

20-KVL-414/1  
KVL-414 1H-NMR in CDCl<sub>3</sub>

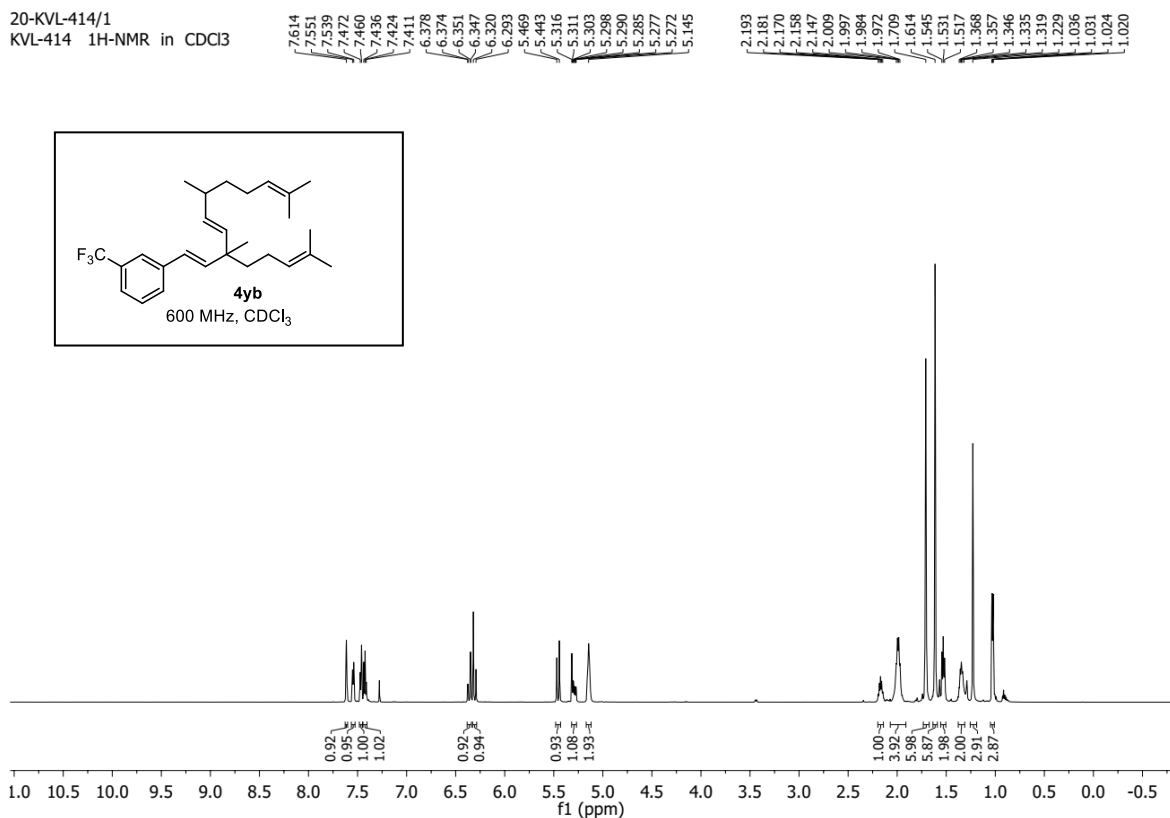

20-KVL-414/2  
KVL-414 13C-NMR

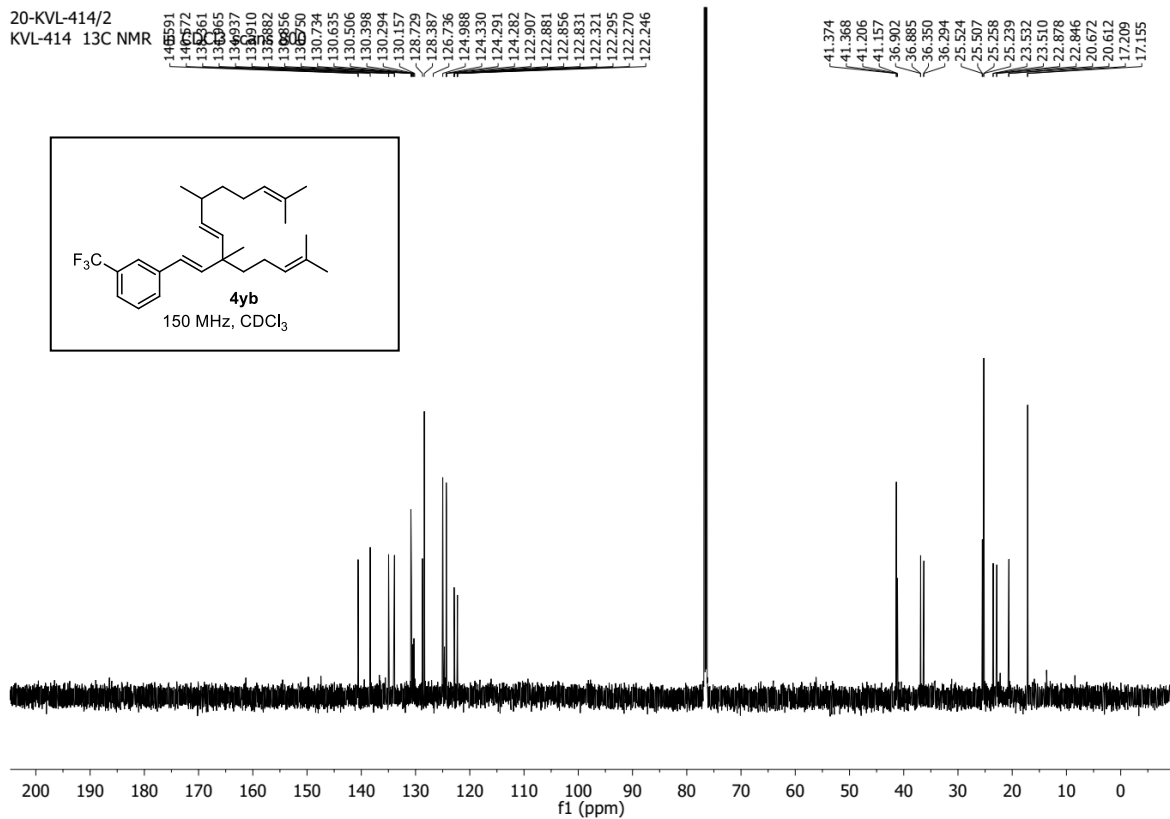

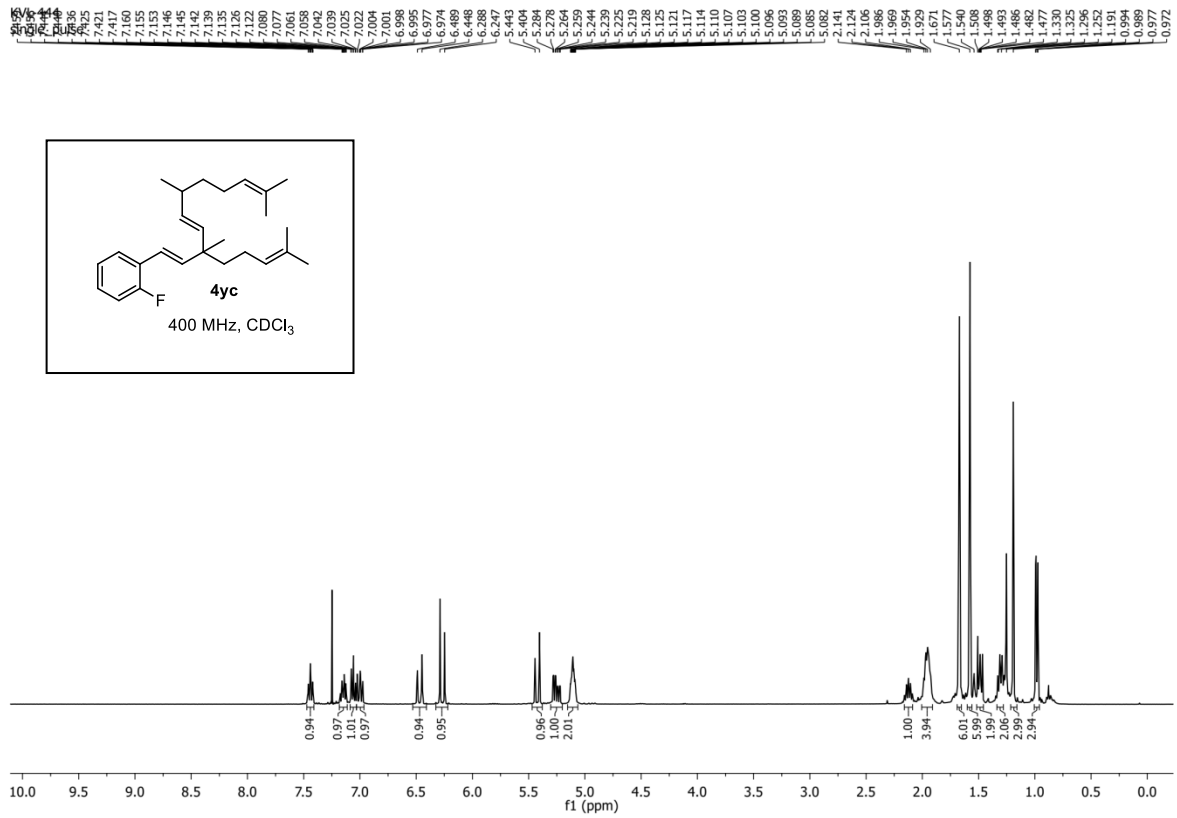

KVL-444  
single pulse decoupled gated NOE

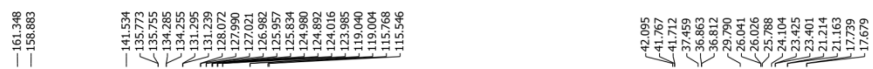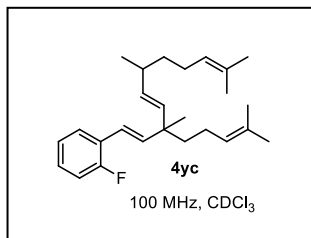

KVL-445  
single\_pulse

7.453  
7.435  
7.202  
7.191  
7.180  
7.162  
7.154  
7.145  
6.561  
6.521  
6.123  
6.120  
6.083  
6.080  
5.999  
5.470  
5.338  
5.319  
5.299  
5.279  
5.183  
5.166  
5.169  
5.166  
5.162  
5.158  
5.154  
5.151  
5.148  
5.137  
5.134  
5.134  
2.355  
2.230  
2.211  
2.194  
2.189  
2.169  
2.141  
2.124  
2.047  
2.028  
2.007  
1.978  
1.978  
1.626  
1.556  
1.542  
1.533  
1.523  
1.503  
1.379  
1.377  
1.358  
1.351  
1.343  
1.339  
1.329  
1.322  
1.320  
1.317  
1.314  
1.306  
1.237  
1.045  
1.045  
1.039  
1.028  
1.025  
1.022

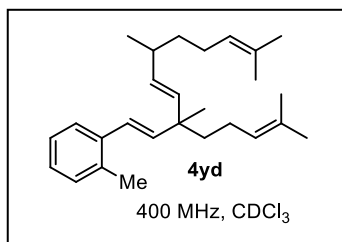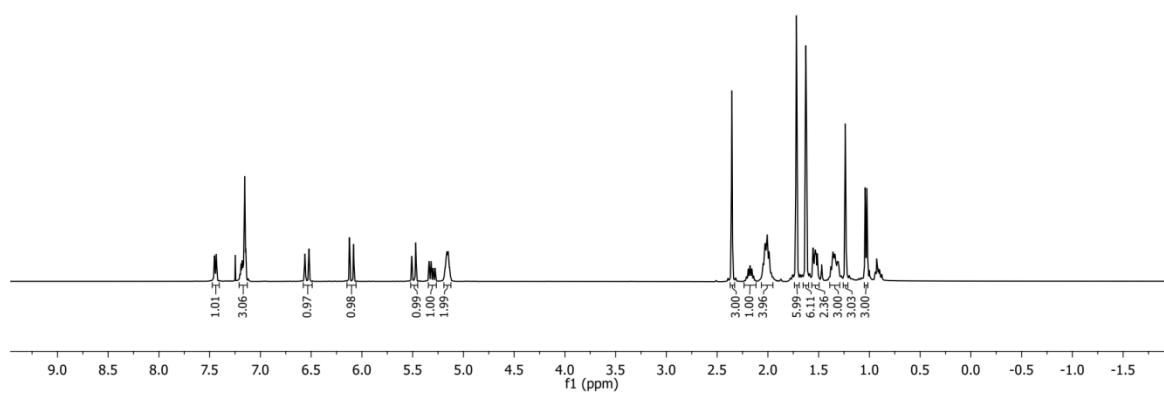

KVL-445  
single pulse decoupled gated NOE

140.611  
137.694  
137.664  
136.182  
136.160  
135.220  
134.152  
134.122  
131.222  
126.867  
126.102  
125.619  
125.126  
124.936  
124.806

42.038  
41.894  
37.164  
36.932  
26.124  
25.835  
24.552  
24.492  
23.520  
22.793  
21.337  
21.301  
19.923  
17.786  
17.736

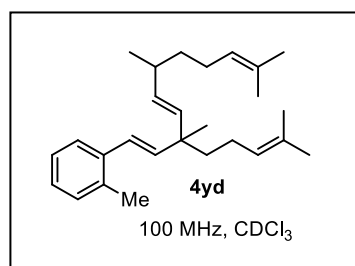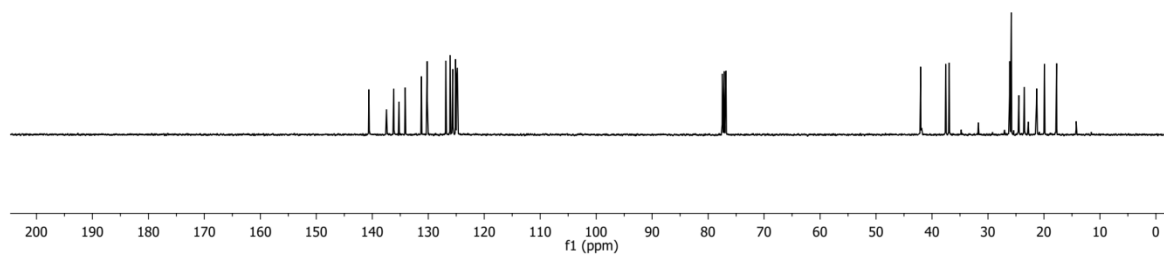

KVL-421  
single\_pulse

5.3738  
5.3482  
5.3345  
5.3083  
5.2962  
5.2926  
5.2736  
5.2706  
5.2570  
5.2535  
5.1788  
5.1582  
5.1395  
5.1197  
5.1082  
5.1042  
5.1008  
5.0977  
5.0872  
5.0809  
5.0799  
2.4388  
2.4204  
2.3991  
2.3810  
2.3595  
2.3444  
2.3113  
2.1141  
2.0965  
2.0793  
2.0621  
2.0445  
1.9759  
1.9585  
1.9271  
1.9142  
1.8933  
1.8794  
1.8697  
1.8509  
1.7707  
1.7500  
1.7341  
1.7212  
1.7172  
1.7131  
1.6751  
1.6625  
1.6395  
1.6282  
1.6183  
1.6165  
1.6099  
1.6020  
1.5819  
1.5710  
1.5510  
1.5235  
1.5169  
1.5056  
1.3412  
1.3312  
1.3216  
1.3112  
1.3018  
1.2983  
1.2464  
1.2286  
1.2112  
1.1912  
1.1660  
0.9679  
0.9528  
0.9510

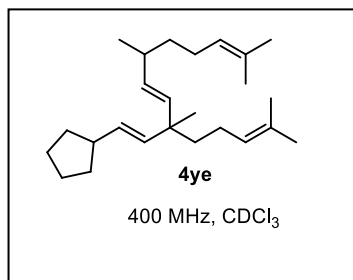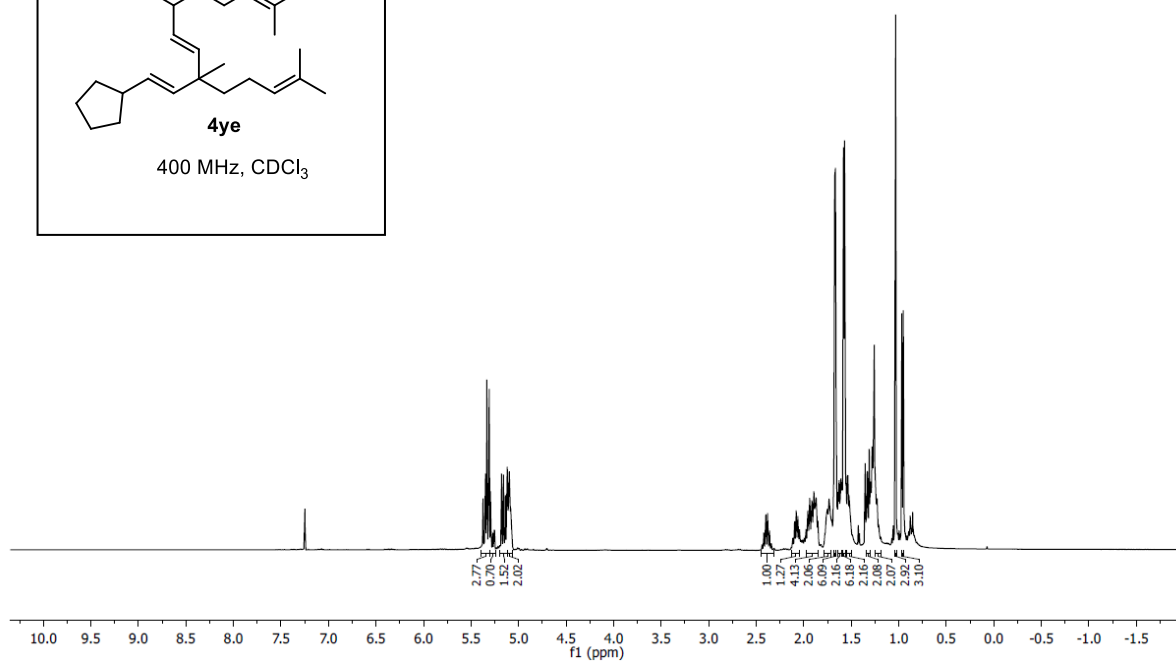

KVL-421  
single pulse decoupled gated NOE

136.894  
136.509  
135.671  
133.073  
133.043  
131.850  
131.095  
130.898  
125.338  
125.010

43.579  
41.908  
40.955  
37.544  
36.775  
35.676  
25.792  
24.456  
24.377  
23.379  
23.352  
21.269  
17.744  
17.615

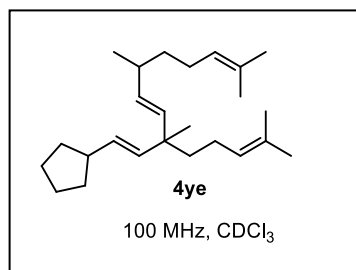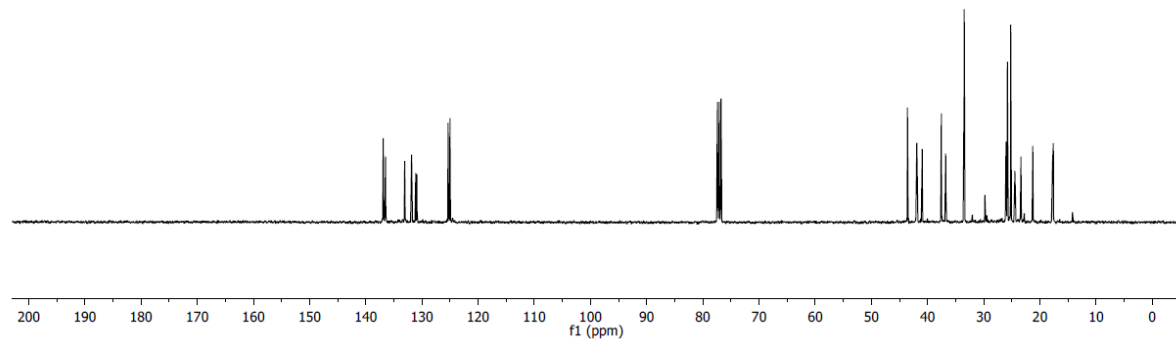



19-KVL-497/1  
KVL-497 1H-NMR in CDCl<sub>3</sub>

7.3260  
7.3117  
6.8740  
6.8596  
6.3341  
6.3076  
6.0233  
6.0105  
5.9988  
5.9411  
5.5018  
5.4908  
5.4765  
5.4652  
5.4543  
5.4424  
5.4312  
5.3869  
5.3746  
3.8254  
2.9444  
2.8325  
2.8204  
2.8084  
2.7964  
2.0753  
2.0639  
2.0525  
2.0411  
1.9657  
1.4738  
1.4599  
1.4480  
1.3886  
1.3800  
1.3687  
1.3572  
0.9546  
0.9426  
0.9337  
0.9225

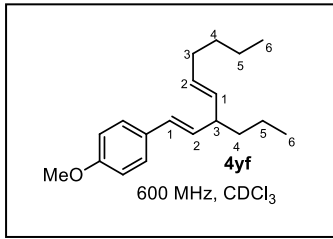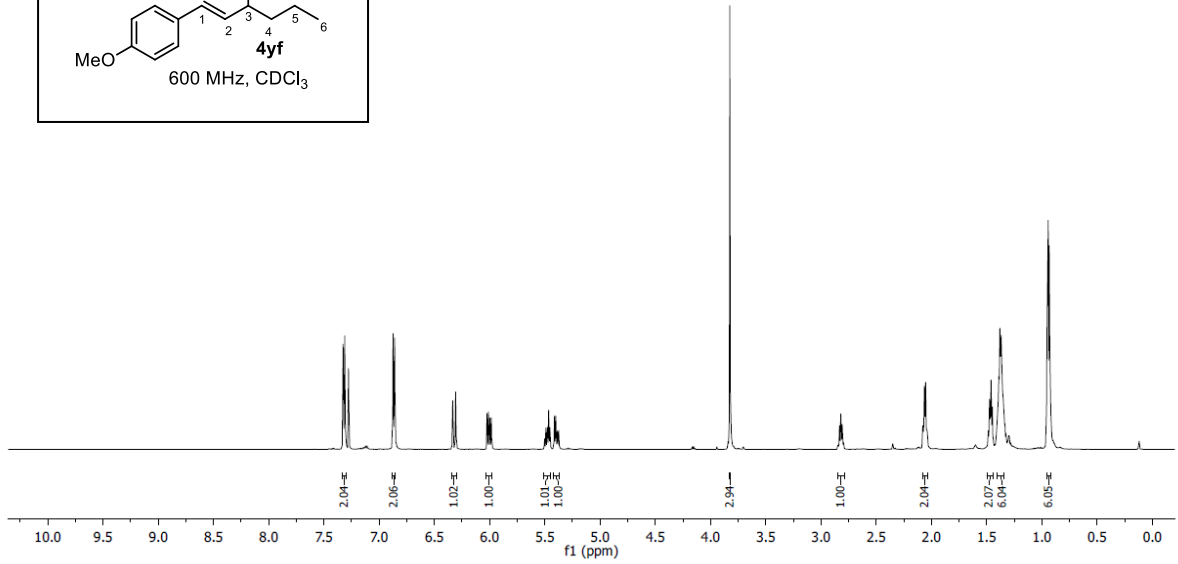

19-KVL-497/2  
KVL-497 13C-NMR in CDCl<sub>3</sub> scans 512

158.206  
132.584  
131.789  
130.298  
127.682  
127.688  
126.841  
113.421  
54.819  
45.325  
37.186  
31.922  
31.329  
21.783  
19.972  
13.647  
13.537

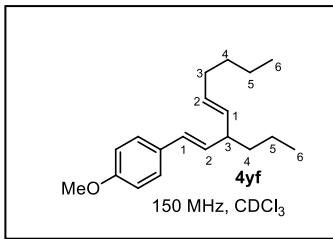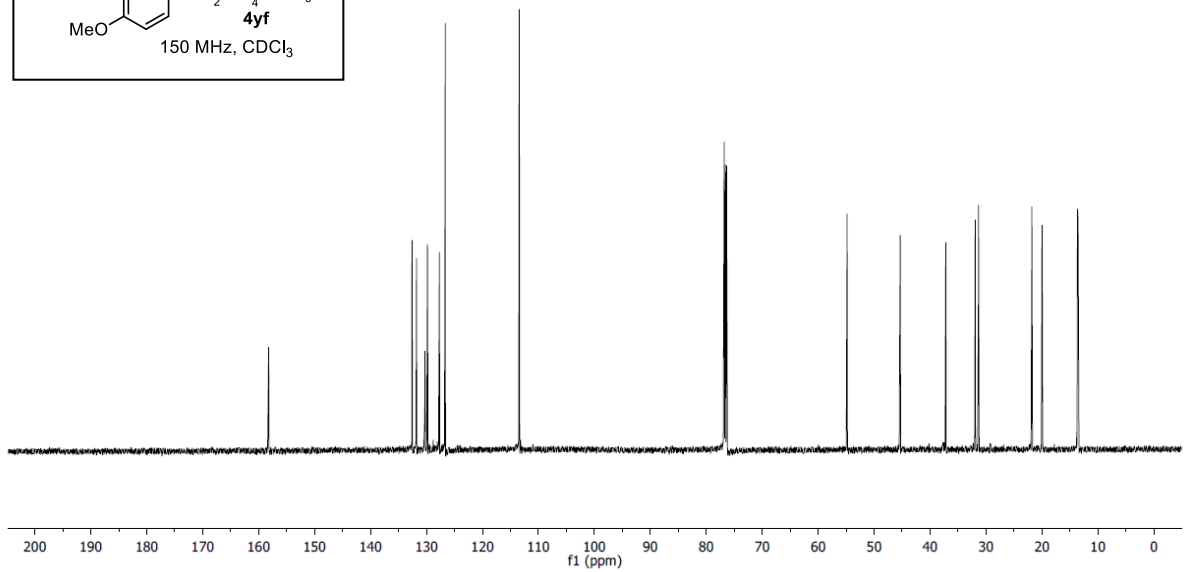

24-KKP-508VL/1  
KKP-508VL 1H-NMR in CDCl<sub>3</sub>

7.2777  
7.2719  
7.2446  
7.2312  
7.2184  
7.1580  
7.1452  
7.1076  
6.3425  
6.1611  
6.1499  
6.1323  
6.1385  
6.1258  
5.4997  
5.4886  
5.4745  
5.4630  
5.4520  
5.3996  
5.3873  
5.3740  
5.3617

2.7501  
2.7381  
2.7261  
2.7141  
2.7021  
2.6902  
2.6782  
2.0473  
2.0354  
2.0235  
2.0119  
1.5293  
1.5238  
1.5173  
1.5107  
1.5052  
1.4986  
1.4866  
1.4743  
1.4395  
1.4271  
1.3999  
1.3878  
0.9415  
0.9369  
0.9293  
0.9247  
0.9194  
0.9124

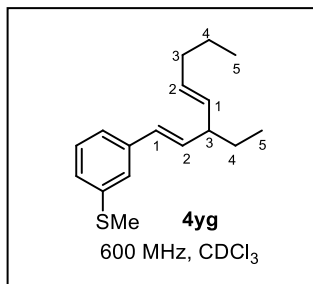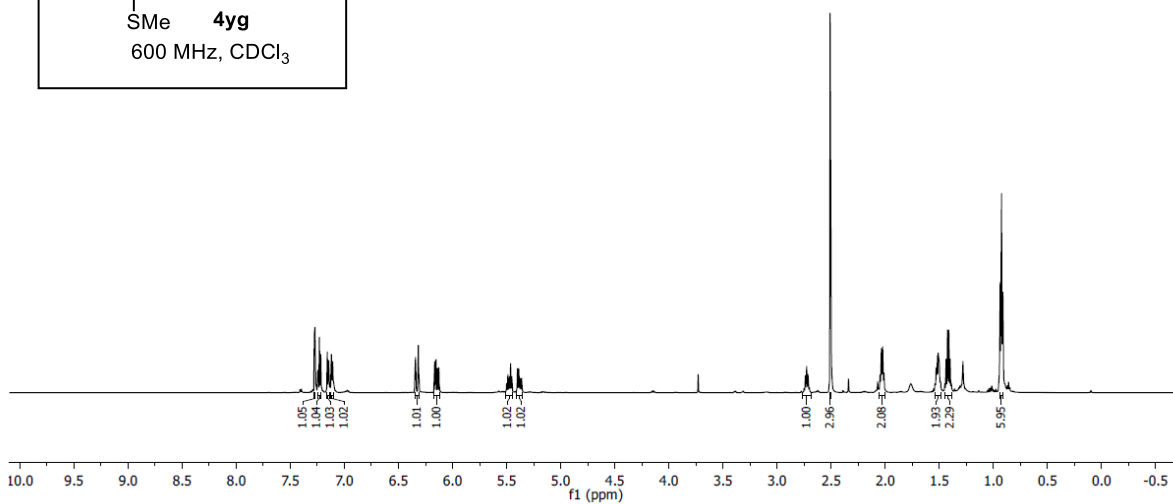

24-KKP-508VL/2  
KKP-508VL 13C-NMR in CDCl<sub>3</sub> scans 300

138.044  
138.016  
134.440  
132.147  
130.216  
128.407  
128.041  
127.868  
127.858  
122.525

47.359  
34.327  
27.702  
22.212  
15.495  
13.335  
11.393

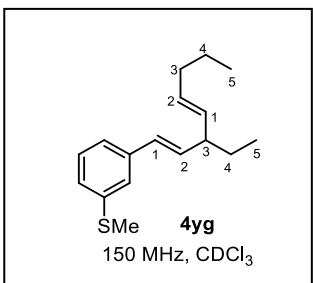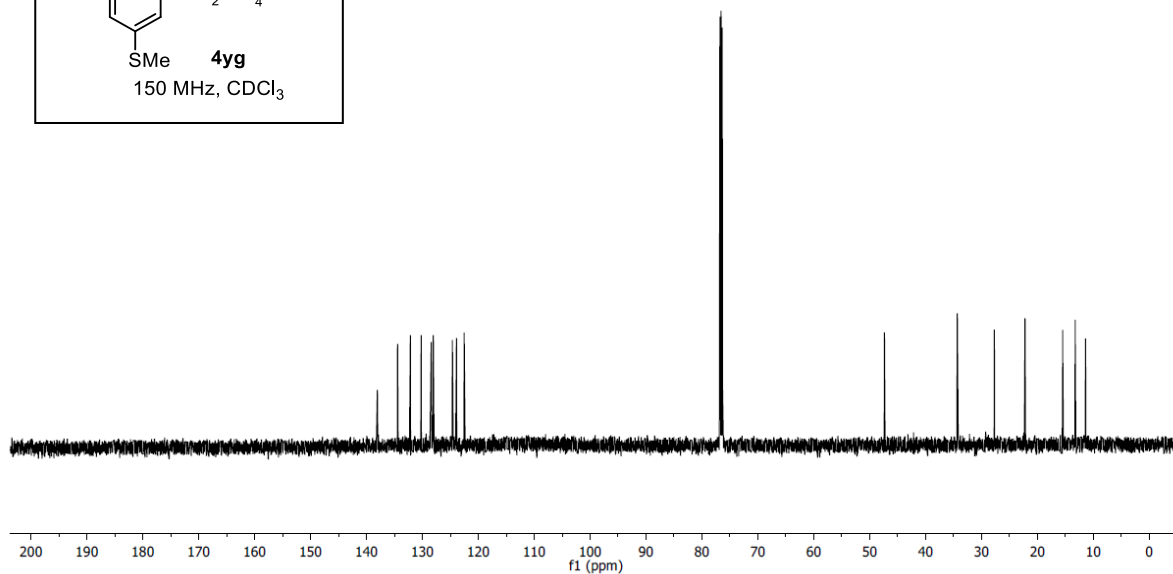

KVL-70AR  
single pulse

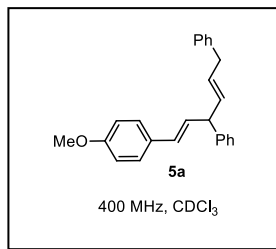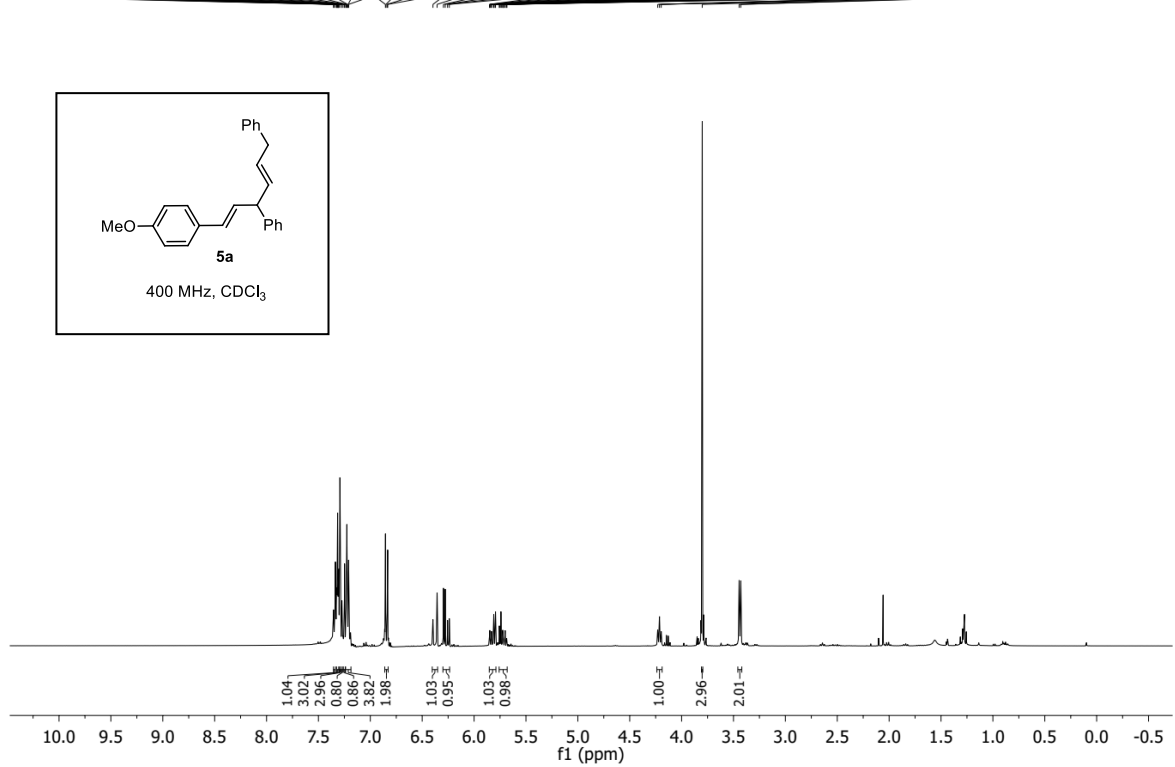

KVL-70AR  
single pulse decoupled gated NO

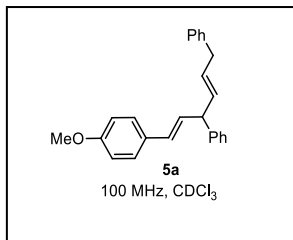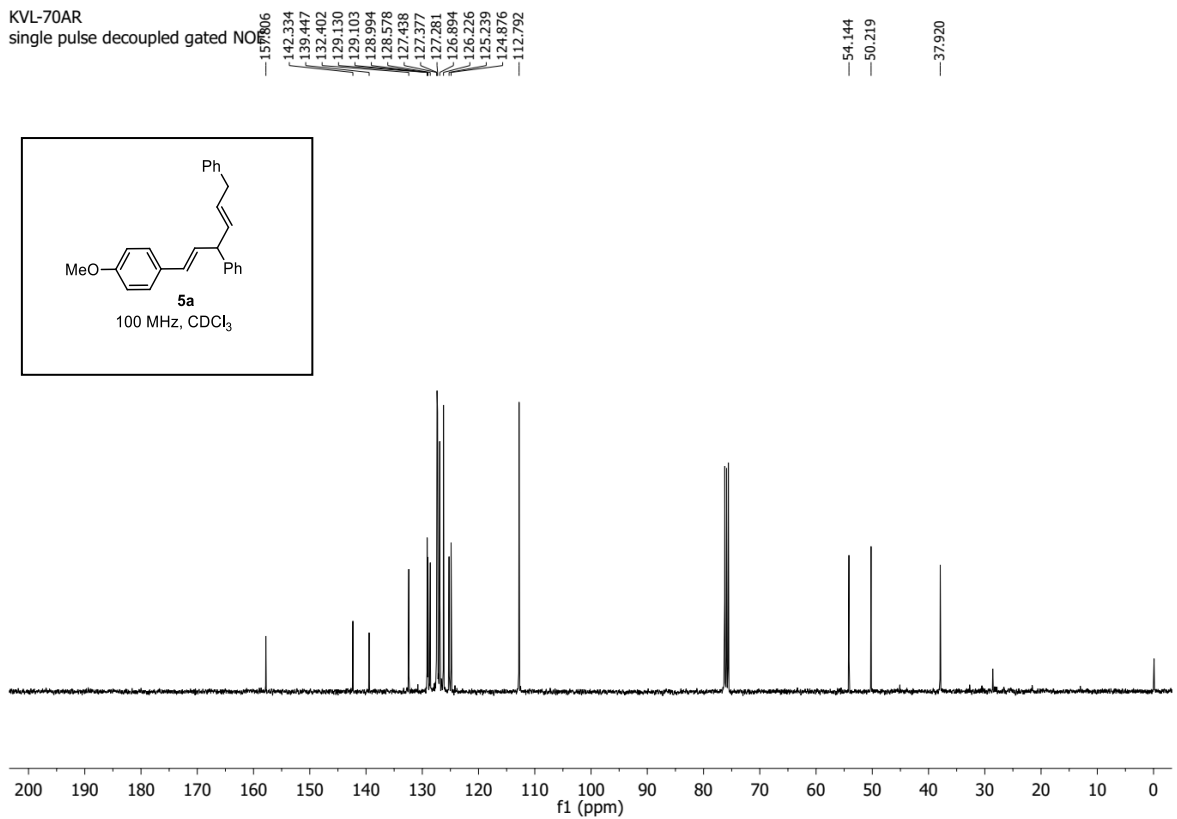

7.7416  
7.7397  
7.7381  
7.7351  
7.7326  
7.6896  
7.6620  
7.6572  
7.6458  
7.6408  
7.5565  
7.5516  
7.5442  
7.5351  
7.5306  
7.5276  
7.5150  
7.5111  
7.4783  
7.4761  
7.4722  
7.4599  
7.4574  
7.4531  
7.4497  
7.4464  
7.4449  
7.4399  
7.4380  
7.4313  
7.4236  
7.4196  
7.4134  
7.4063  
7.4009  
7.3730  
7.3690  
7.3647  
7.3567  
7.3540  
7.3415  
7.3401  
7.3341  
7.3296  
7.3238  
7.3220  
7.3206  
6.5802  
6.5744  
6.5715  
5.9809  
5.9457  
5.9426  
5.9400  
5.9288  
5.9260  
5.8946  
5.8934  
5.8791  
5.8768  
5.8628  
5.8603  
5.8408  
5.8386  
4.3739  
4.3661  
3.5625  
3.5465

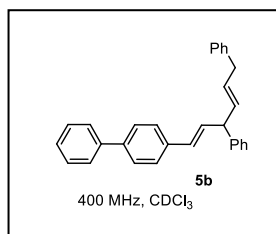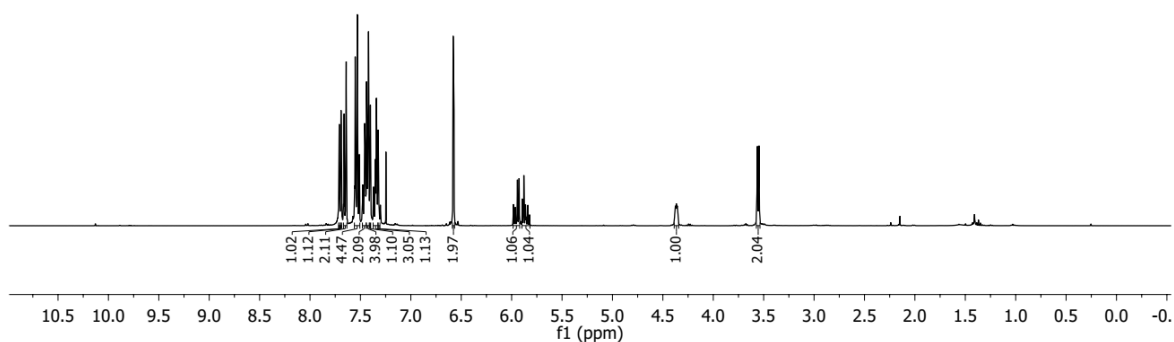

KVL-79C  
single pulse decoupled gated NOESY

148.10  
140.977  
140.736  
140.178  
136.680  
133.501  
132.791  
130.621  
130.131  
128.999  
128.812  
128.676  
128.288  
127.454  
127.419  
127.128  
126.913  
126.717  
126.284

— 51.646

— 39.299

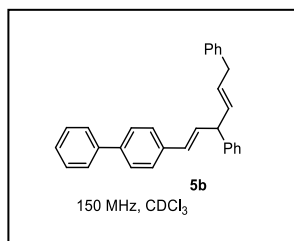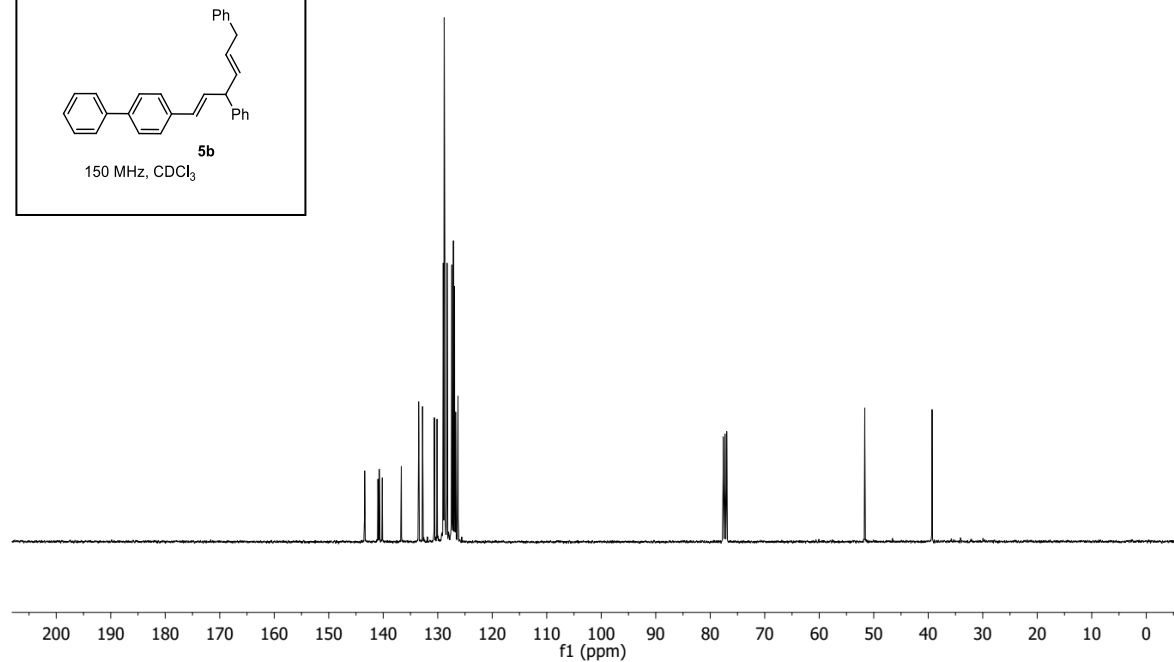

KVL-125  
single\_pulse

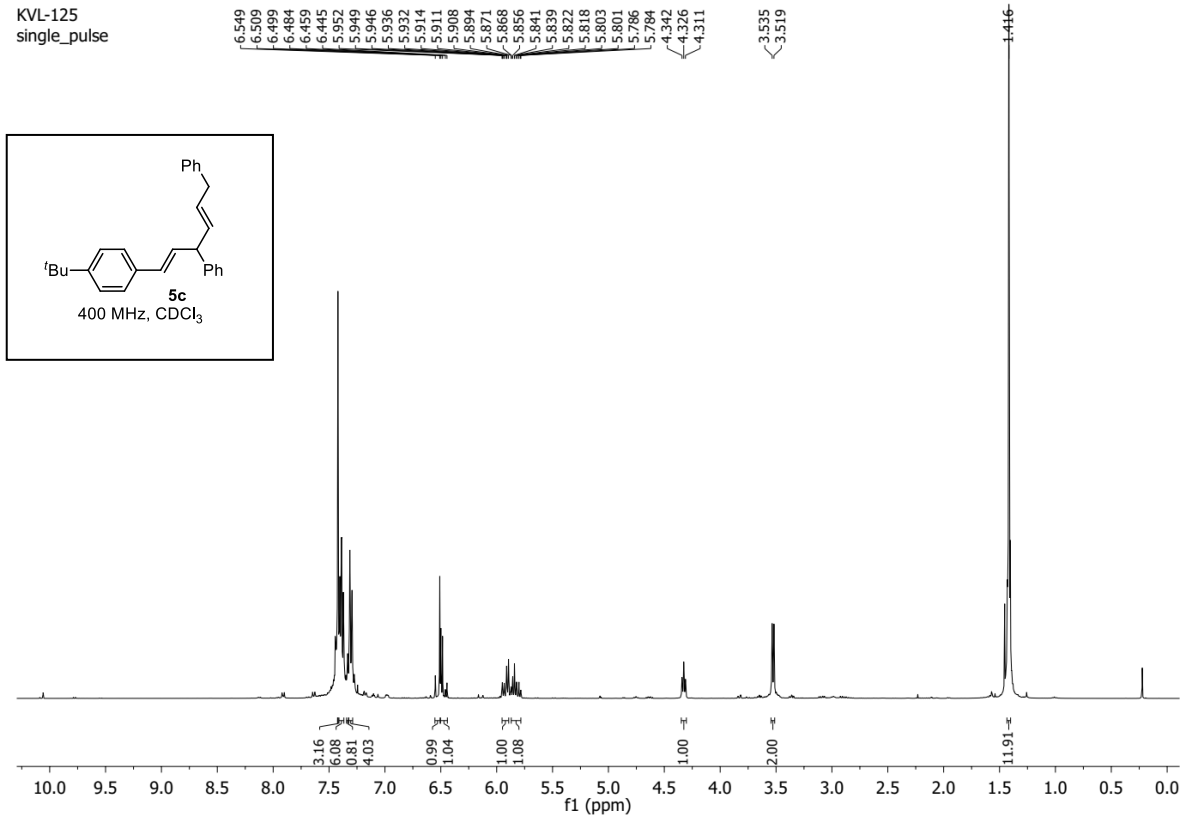

KVL-125  
single pulse decoupled gated NOE

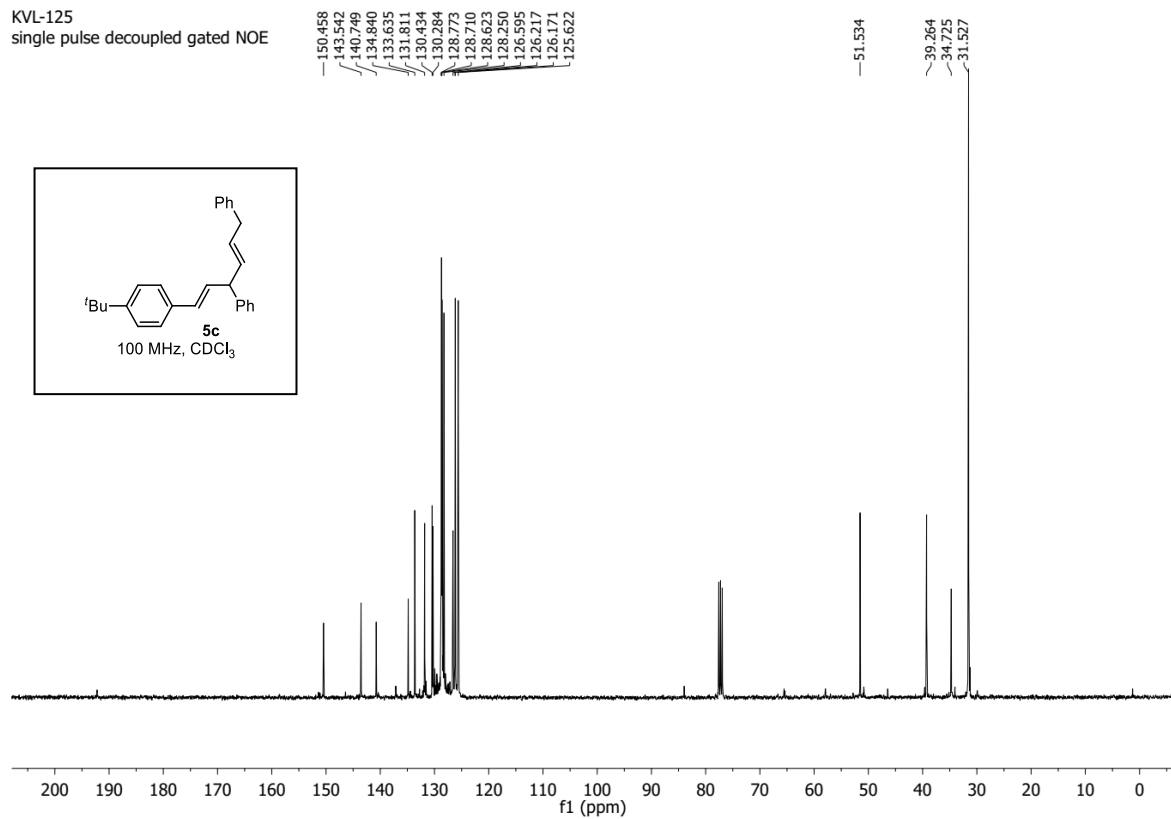

KVL-393  
single pulse

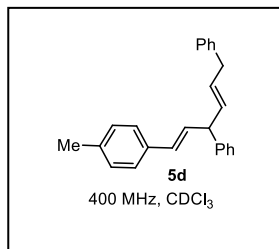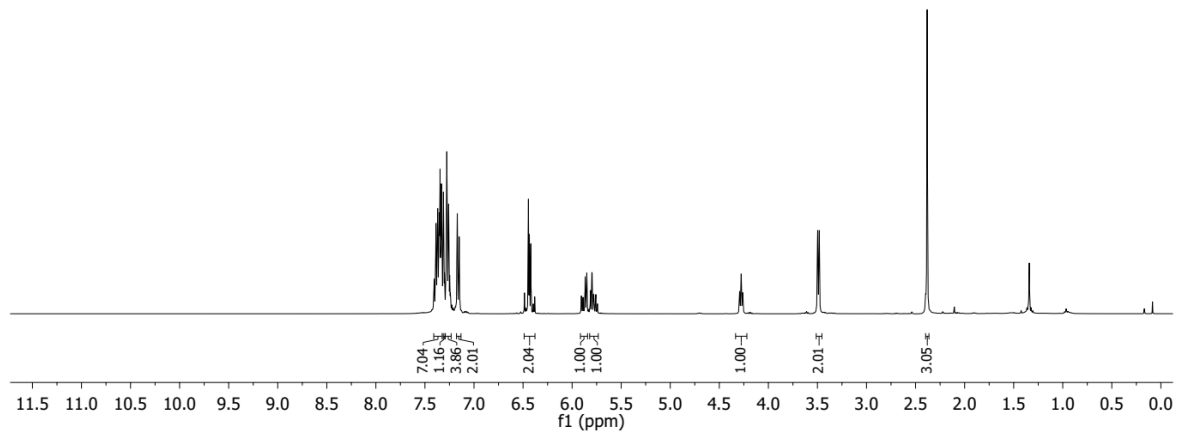

KVL-393  
single pulse decoupled gated NOE

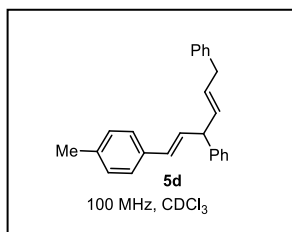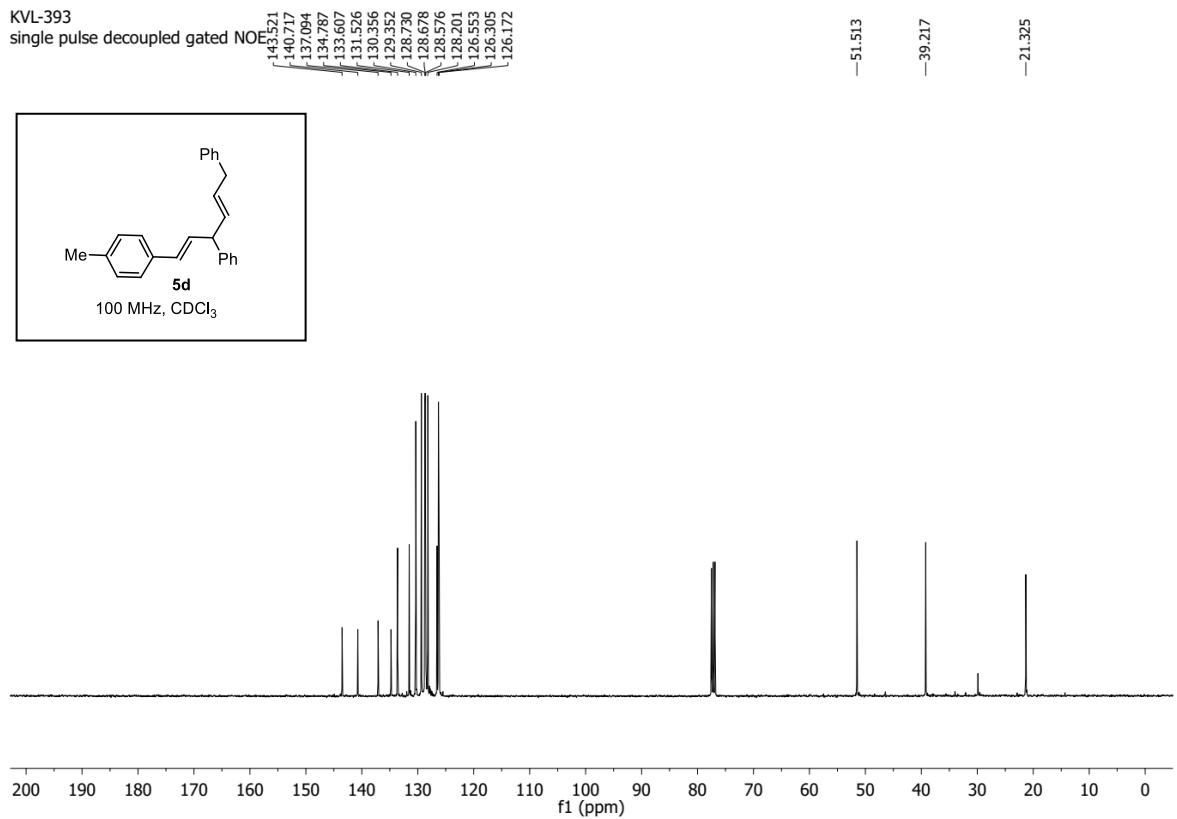

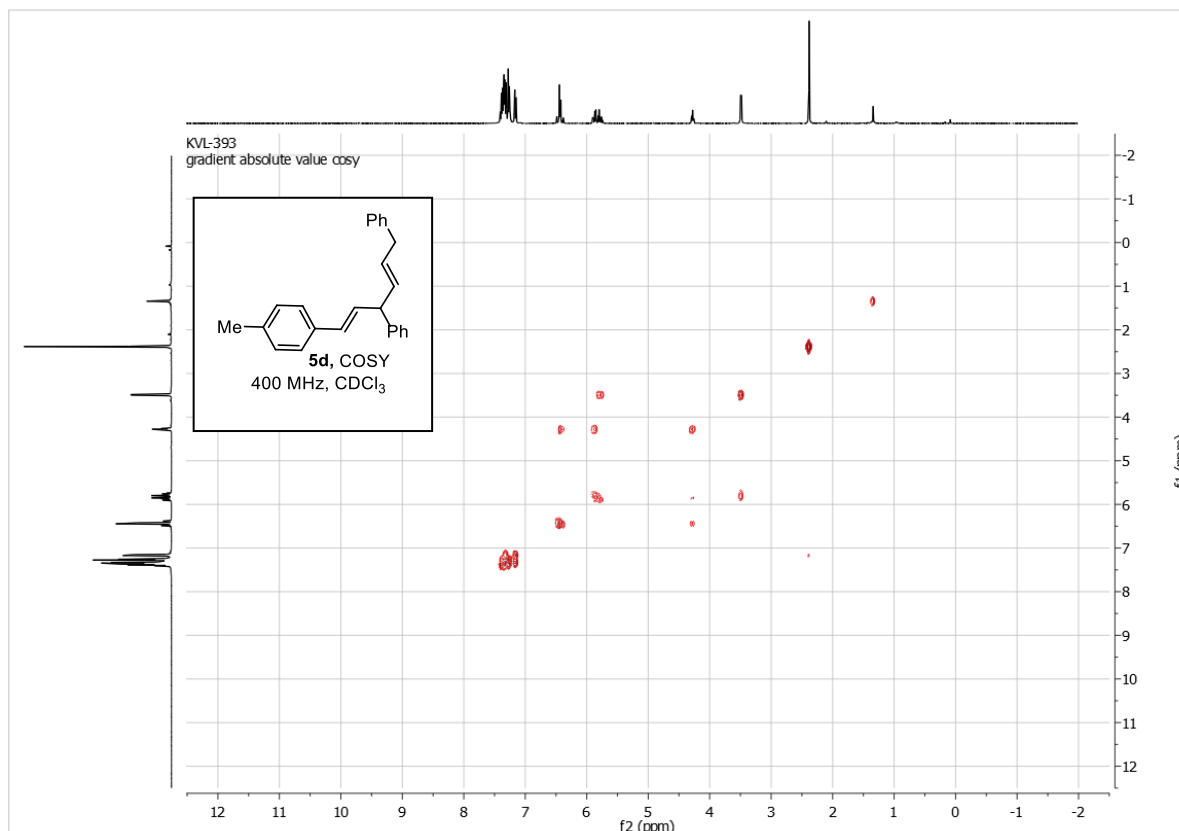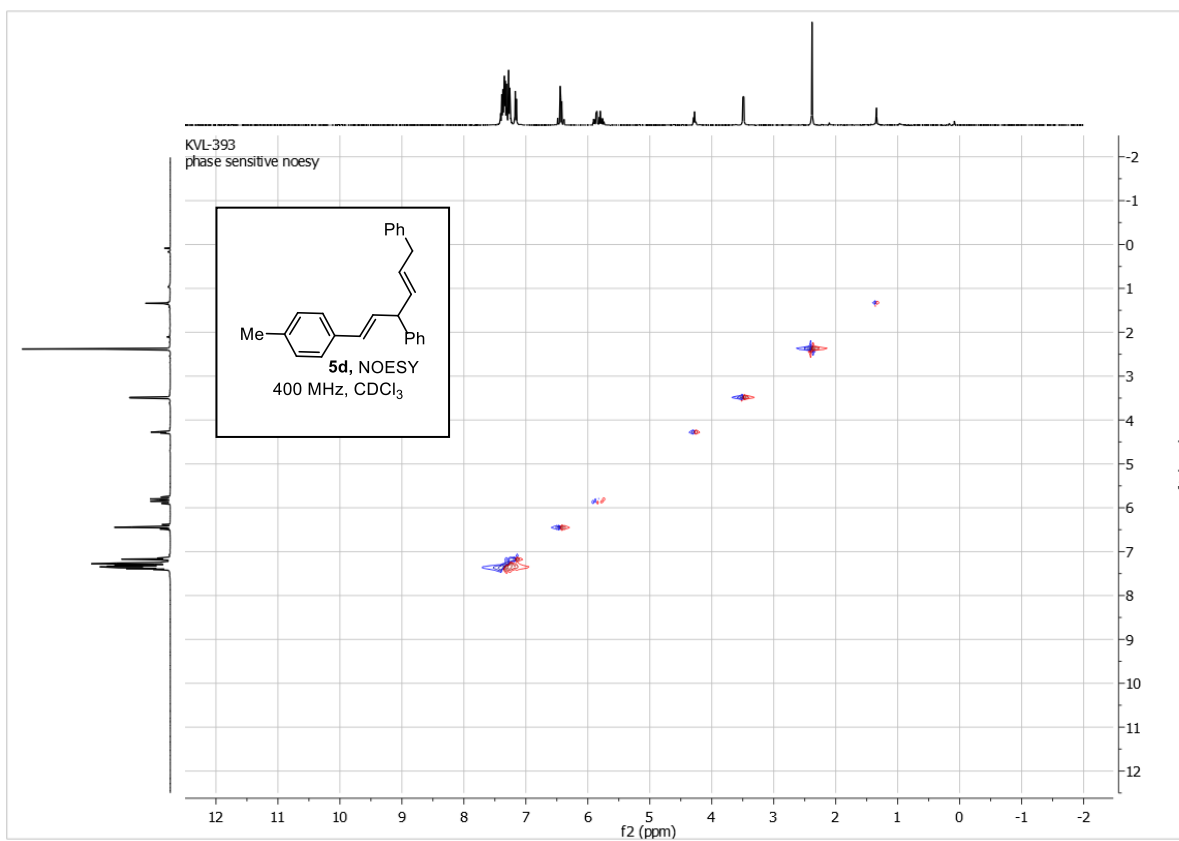

KVL-393  
absorption tocsy

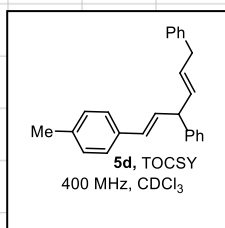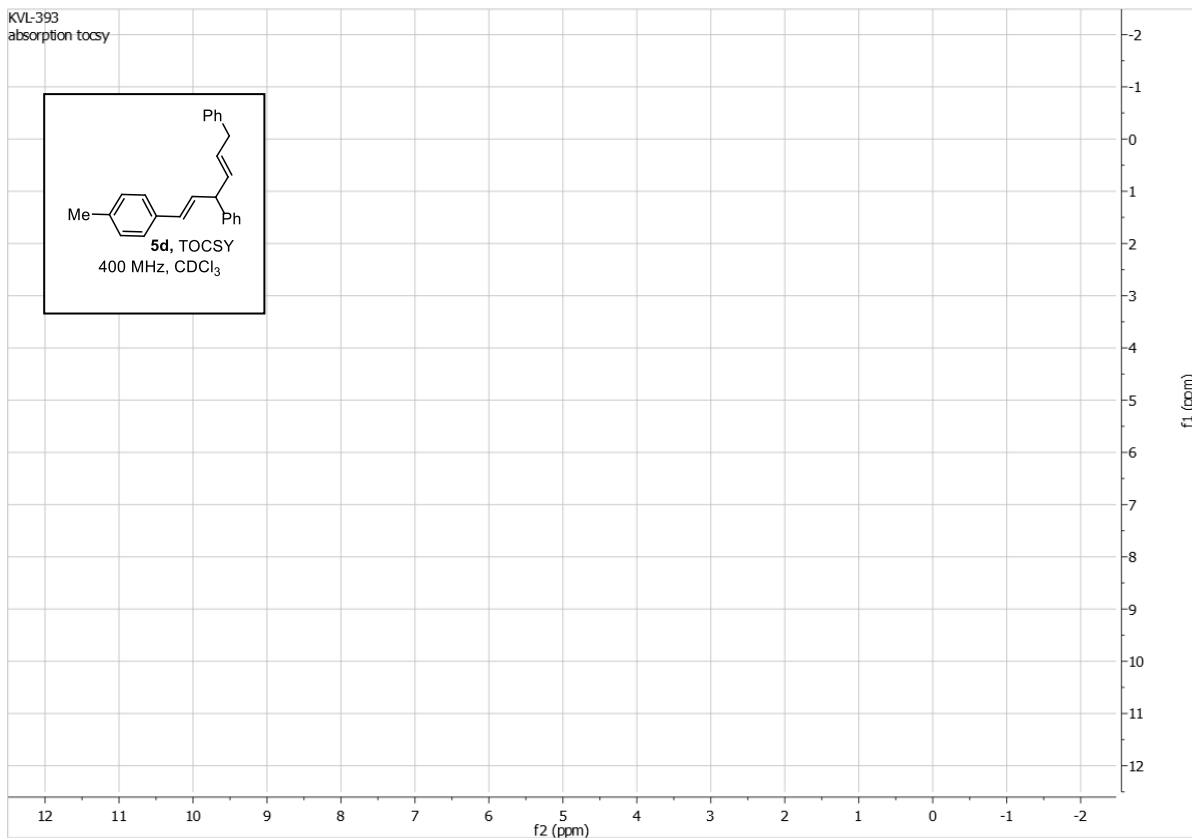

KVL-393  
DEPT with decoupling

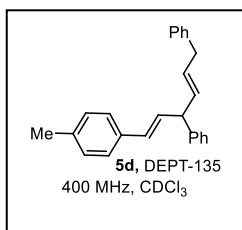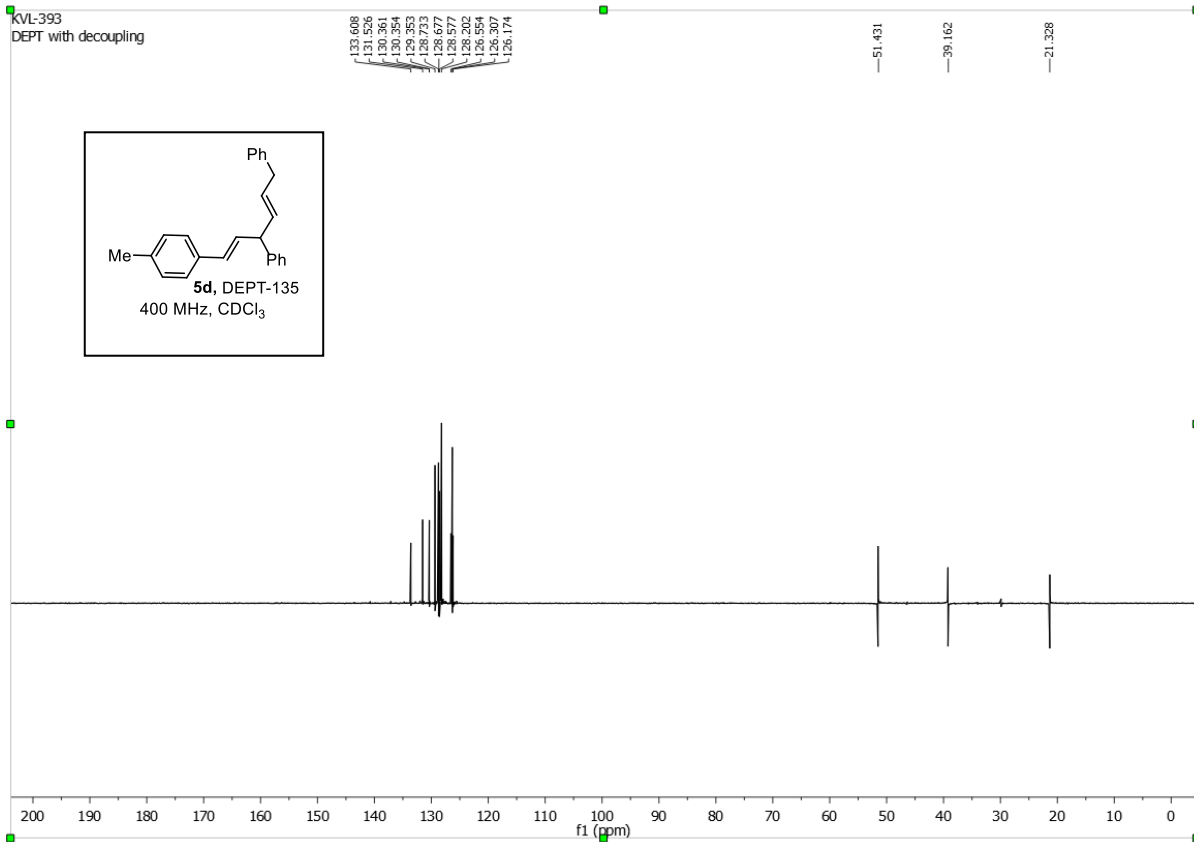



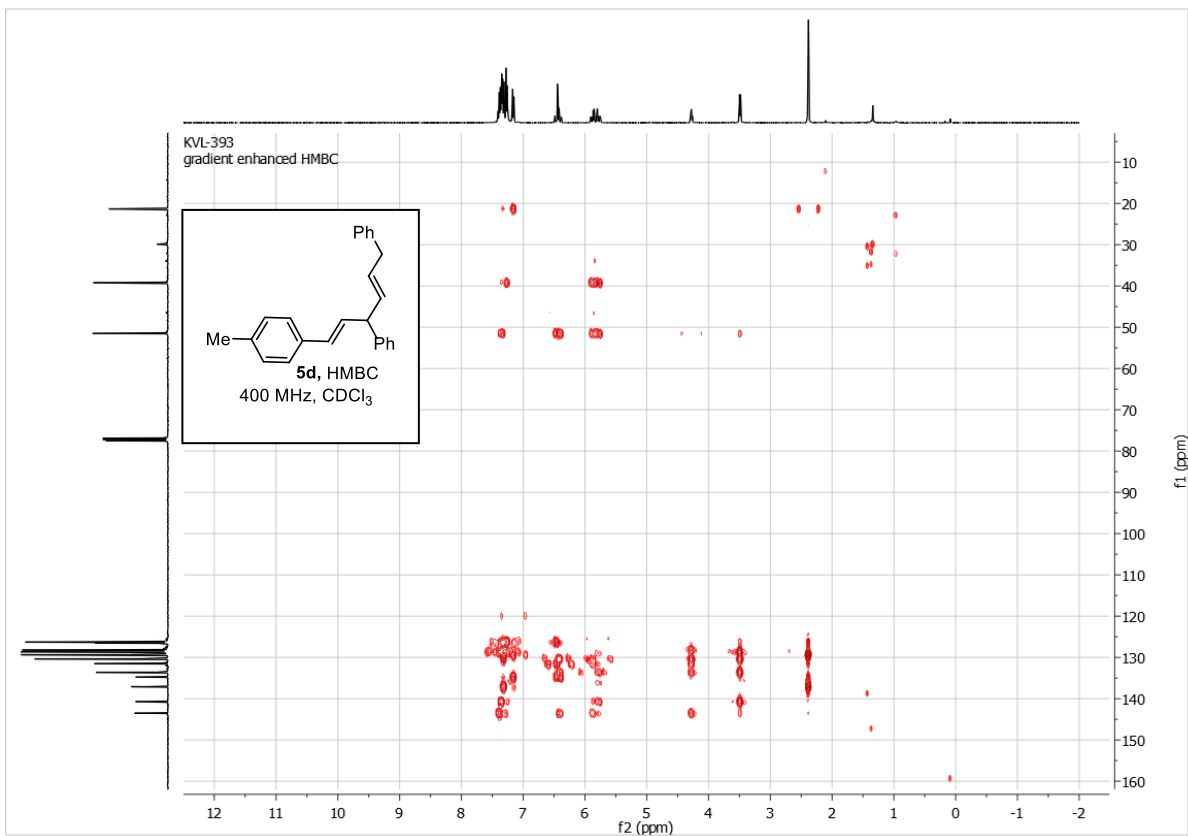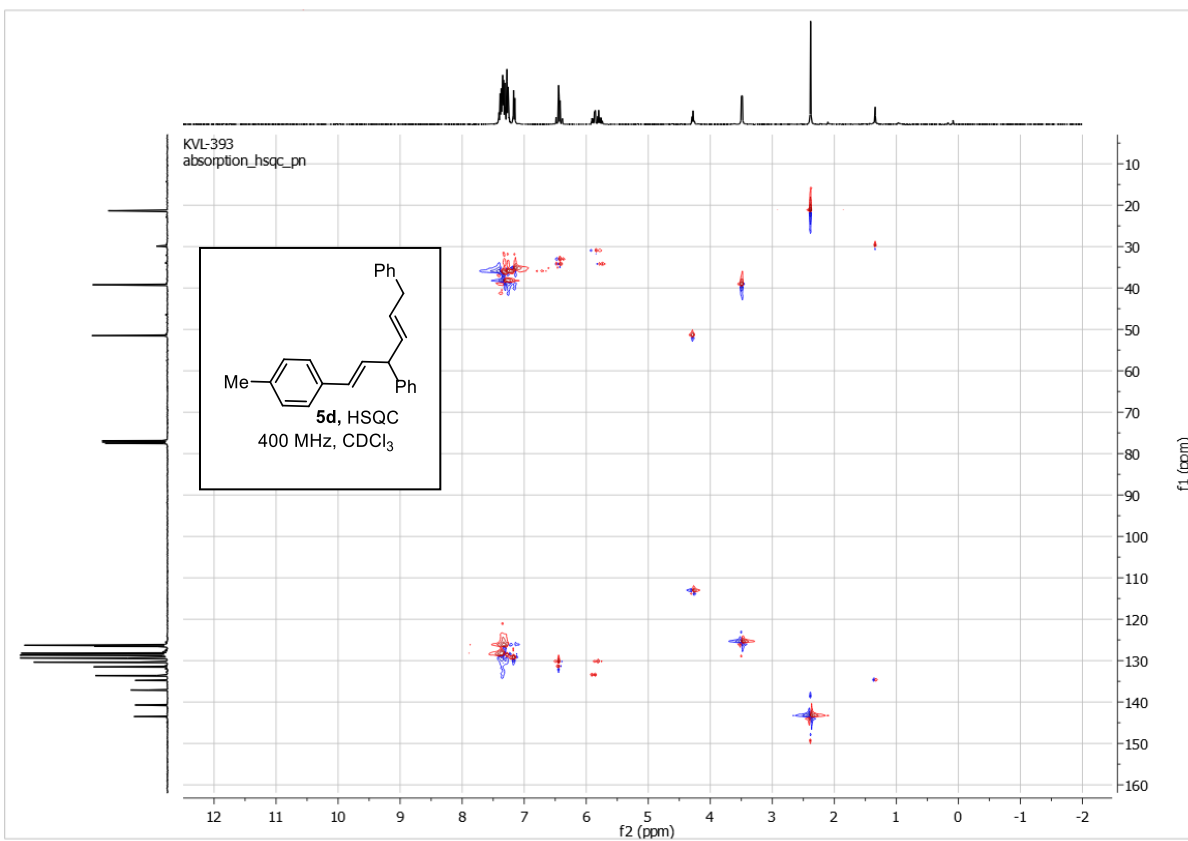

7.44166  
 7.43891  
 7.41888  
 7.41113  
 7.39855  
 7.38823  
 7.35118  
 7.33392  
 7.32288  
 7.30486  
 6.94333  
 6.92999  
 6.92951  
 6.92222  
 6.49941  
 6.48338  
 6.45442  
 6.44430  
 6.39984  
 6.38847  
 6.38115  
 6.36882  
 6.35887  
 6.34500  
 6.34118  
 5.95299  
 5.93994  
 5.93667  
 5.91417  
 5.90111  
 5.89894  
 5.88558  
 5.86223  
 5.84984  
 5.84661  
 5.83952  
 5.83226  
 5.8296  
 5.8195  
 5.8102  
 5.8078  
 5.7969  
 5.7944  
 4.3272  
 4.3114  
 4.2942  
 3.5414  
 3.5265  
 1.4125  
 1.3961  
 1.3930  
 1.3891  
 1.3830  
 1.3789  
 1.3755  
 1.3735  
 1.3635  
 1.3615  
 1.3590  
 1.3555  
 1.3476  
 1.3418  
 1.3384  
 1.3249  
 1.2554  
 1.2212  
 1.2175  
 1.2048

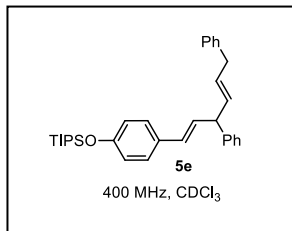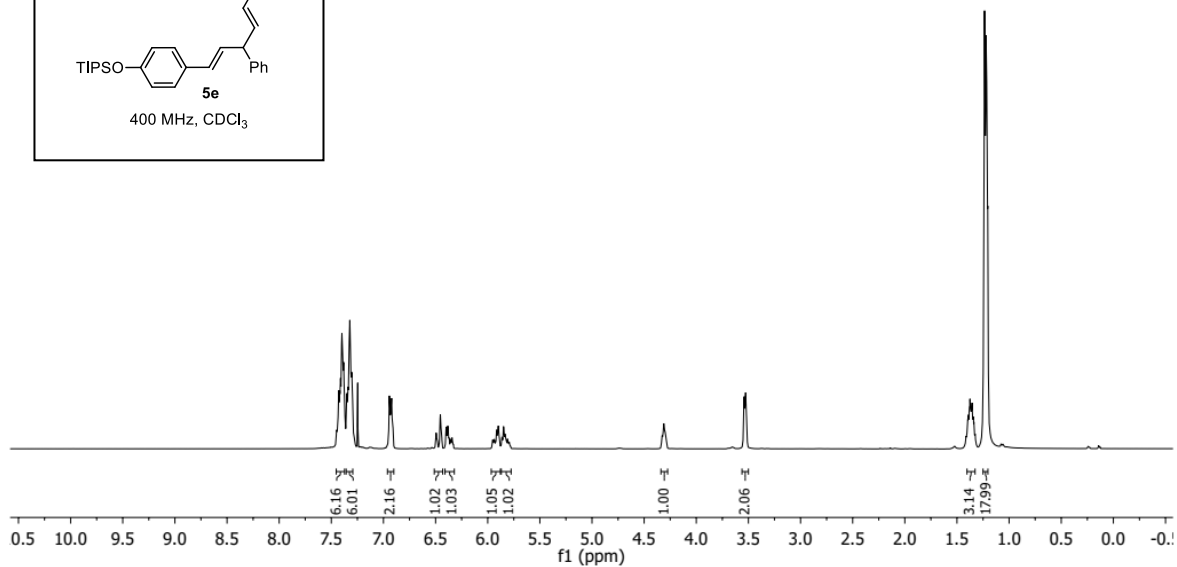

KVL-364  
 single pulse decoupled gated NOE

155.680  
 143.697  
 140.774  
 133.783  
 130.677  
 130.362  
 130.310  
 130.096  
 128.786  
 128.623  
 128.241  
 127.516  
 126.574  
 126.222  
 120.119  
 51.603  
 39.280  
 18.168  
 12.905

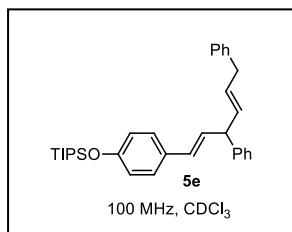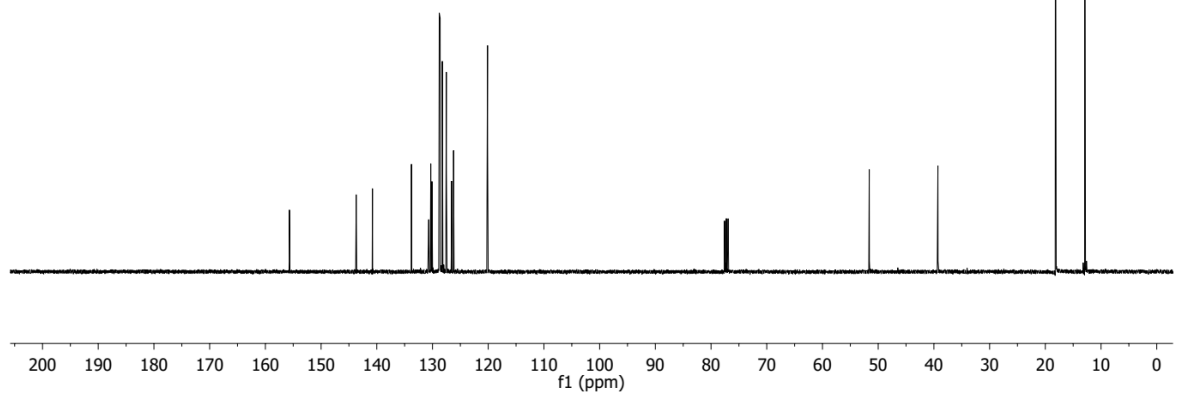

7.405  
 7.390  
 7.388  
 7.385  
 7.377  
 7.372  
 7.322  
 7.292  
 7.079  
 7.074  
 7.062  
 7.057  
 7.053  
 7.041  
 7.035  
 6.492  
 6.452  
 6.431  
 6.415  
 6.391  
 6.375  
 5.938  
 5.936  
 5.933  
 5.922  
 5.919  
 5.900  
 5.897  
 5.895  
 5.883  
 5.881  
 5.851  
 5.836  
 5.834  
 5.820  
 5.818  
 5.814  
 5.812  
 5.798  
 5.796  
 5.782  
 5.780  
 4.321  
 4.305  
 4.289  
 4.289  
 3.530  
 3.514

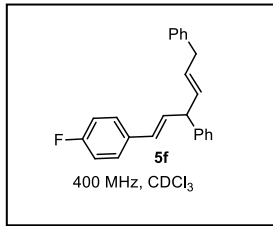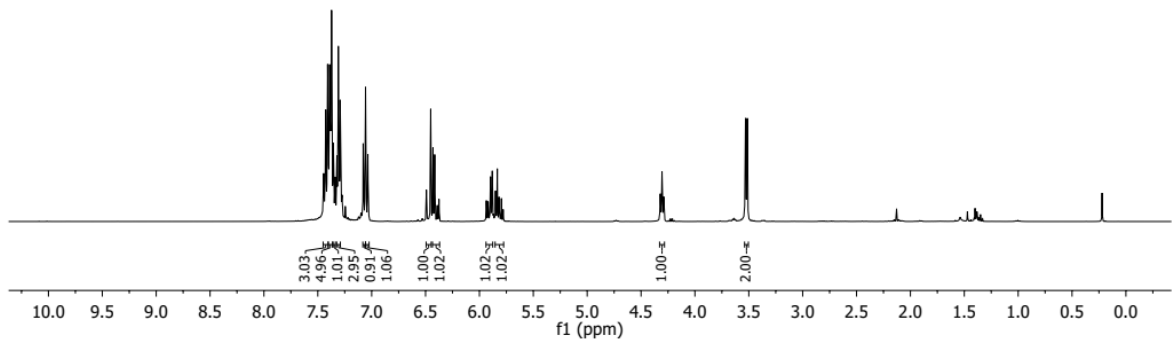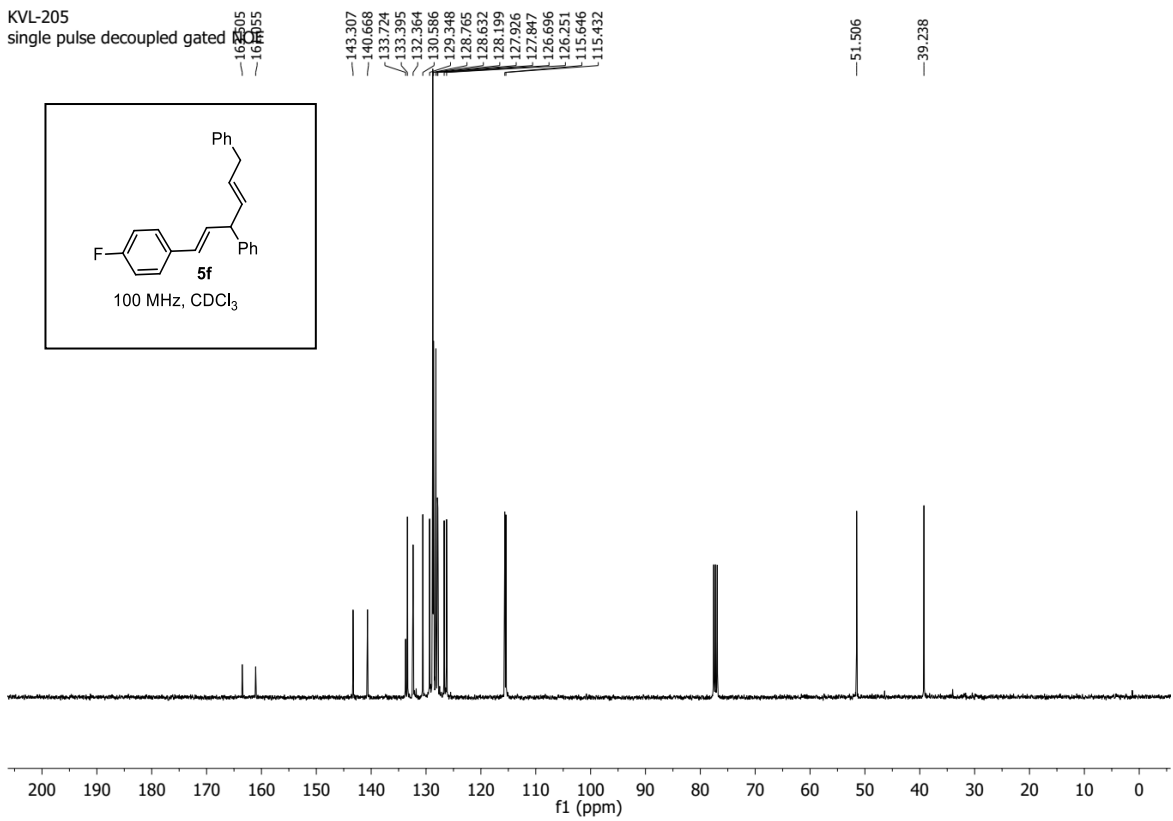

8.164  
 7.965  
 7.950  
 7.930  
 7.9340  
 7.9283  
 7.4035  
 7.4016  
 7.3977  
 7.3947  
 7.3846  
 7.3828  
 7.3808  
 7.3692  
 7.3651  
 7.3631  
 7.3465  
 7.3442  
 7.3397  
 7.3282  
 7.3218  
 7.3176  
 7.3030  
 7.2998  
 7.2968  
 7.2872  
 7.2819  
 7.2767  
 7.2673  
 7.2579  
 7.2536  
 7.2444  
 7.2414  
 7.2367  
 6.4756  
 6.4600  
 6.4358  
 6.4333  
 6.4291  
 6.4203  
 6.4178  
 6.4137  
 6.4022  
 6.3623  
 5.8816  
 5.8788  
 5.8650  
 5.8462  
 5.8433  
 5.8406  
 5.8363  
 5.8293  
 5.8267  
 5.8248  
 5.7998  
 5.7987  
 5.7846  
 5.7824  
 5.7686  
 5.7659  
 5.7615  
 5.7463  
 5.7441  
 4.2736  
 4.2578  
 4.2418  
 3.4846  
 3.4688

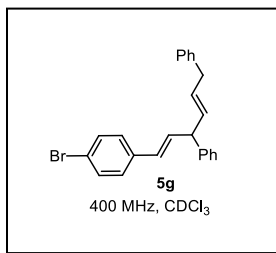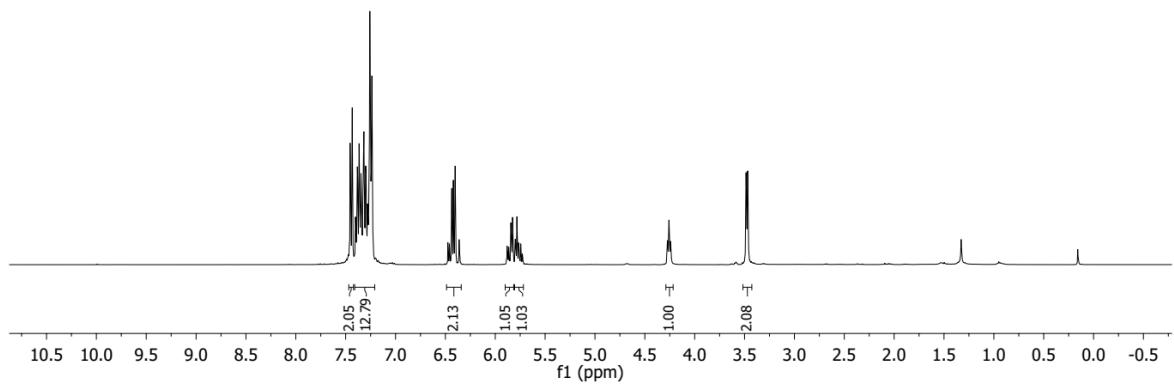

KVL-85

single pulse decoupled gated NOE

143.049  
 140.580  
 136.475  
 133.435  
 133.150  
 131.710  
 130.689  
 129.344  
 128.761  
 128.713  
 128.598  
 126.159  
 127.941  
 126.710  
 126.222  
 121.039

51.493

39.196

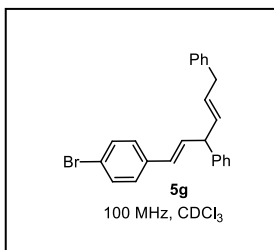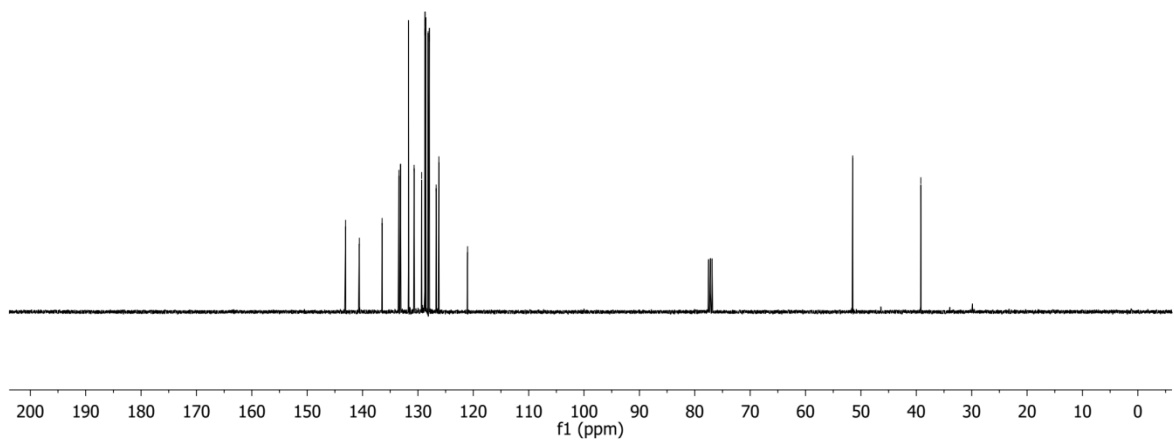

KVL-91B  
single\_pulse

7.4478  
7.4443  
7.4396  
7.4294  
7.4101  
7.4076  
7.3690  
7.3479  
7.3439  
7.3381  
7.3361  
7.3081  
7.3067  
7.2937  
7.2885  
7.2871  
6.5074  
6.4990  
6.4980  
6.4698  
6.4676  
6.4644  
6.4572  
6.4192  
5.9919  
5.9822  
5.9152  
5.8933  
5.8909  
5.8757  
5.8493  
5.8468  
5.8330  
5.8244  
5.8167  
5.8128  
5.7947  
5.7911  
5.7784  
4.3211  
4.2973  
4.2936  
3.5299  
3.5140

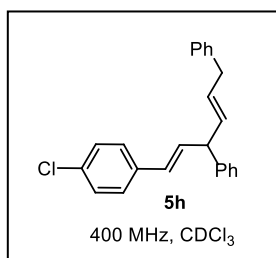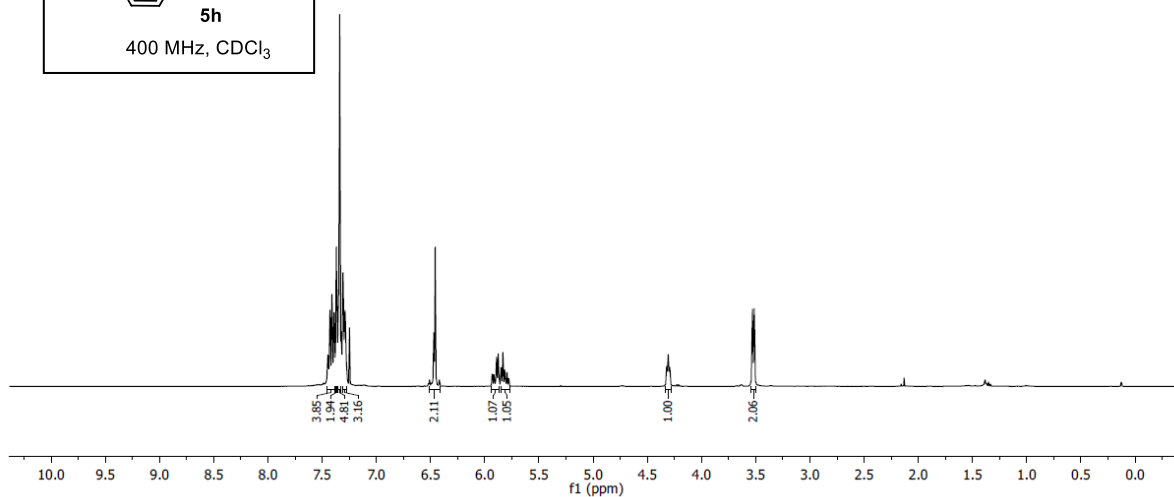

KVL-91B  
single pulse decoupled gated NOE

143.151  
140.637  
136.086  
135.263  
133.251  
132.960  
130.722  
129.347  
128.819  
128.771  
128.556  
127.661  
126.760  
126.280  
51.536  
39.251

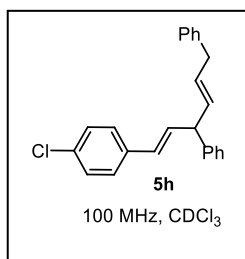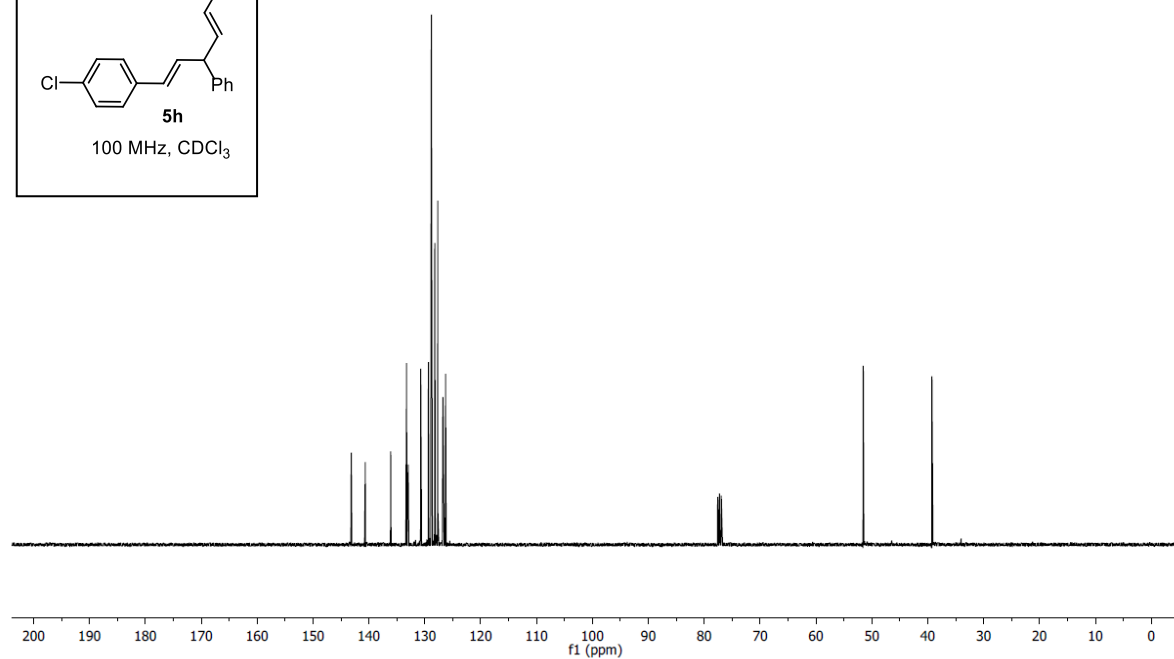

KVL-89C  
single\_pulse

7.6442  
7.6240  
7.3897  
7.3870  
7.3706  
7.3689  
7.3515  
7.3355  
7.3333  
7.3160  
7.3031  
7.2866  
7.2854  
7.2837  
7.2709  
7.2565  
7.2535  
7.2474  
7.2260  
7.1246  
7.1096  
6.4761  
6.4736  
6.4696  
6.4669  
6.4465  
6.4414  
6.4364  
6.4339  
6.4197  
6.4172  
6.3760  
6.3360  
5.8677  
5.8650  
5.8511  
5.8488  
5.8294  
5.8267  
5.8128  
5.8105  
5.7844  
5.7833  
5.7706  
5.7682  
5.7657  
5.7544  
5.7519  
5.7492  
5.7471  
5.7323  
5.7300  
5.7274  
5.7161  
5.7137  
5.7112  
4.2619  
4.2455  
4.2291  
3.4728  
3.4569

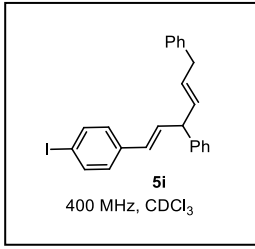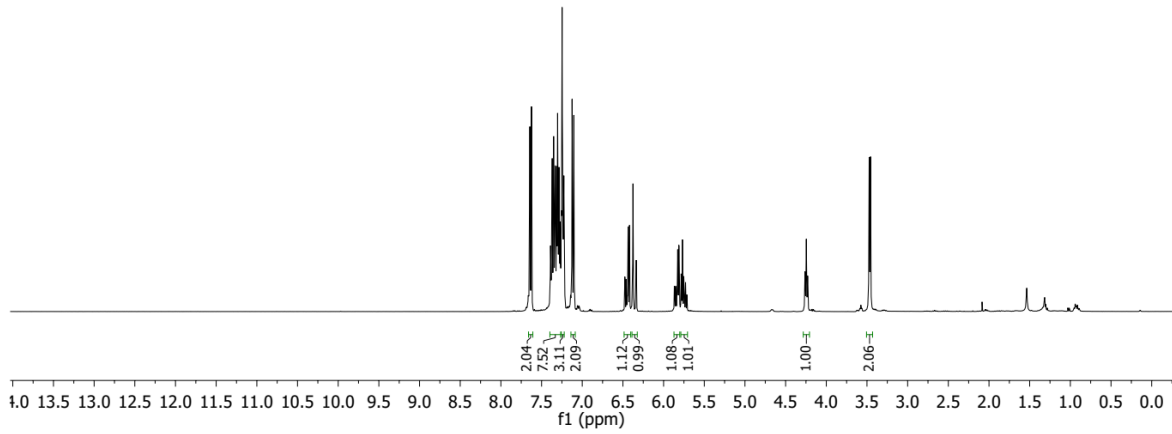

KVL-89C  
single pulse decoupled gated NOE

143.016  
140.565  
137.666  
137.049  
133.551  
133.120  
130.692  
129.440  
128.752  
128.703  
128.591  
128.193  
128.152  
126.704  
126.215  
92.488  
51.475  
39.189

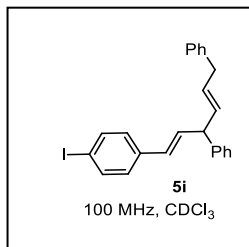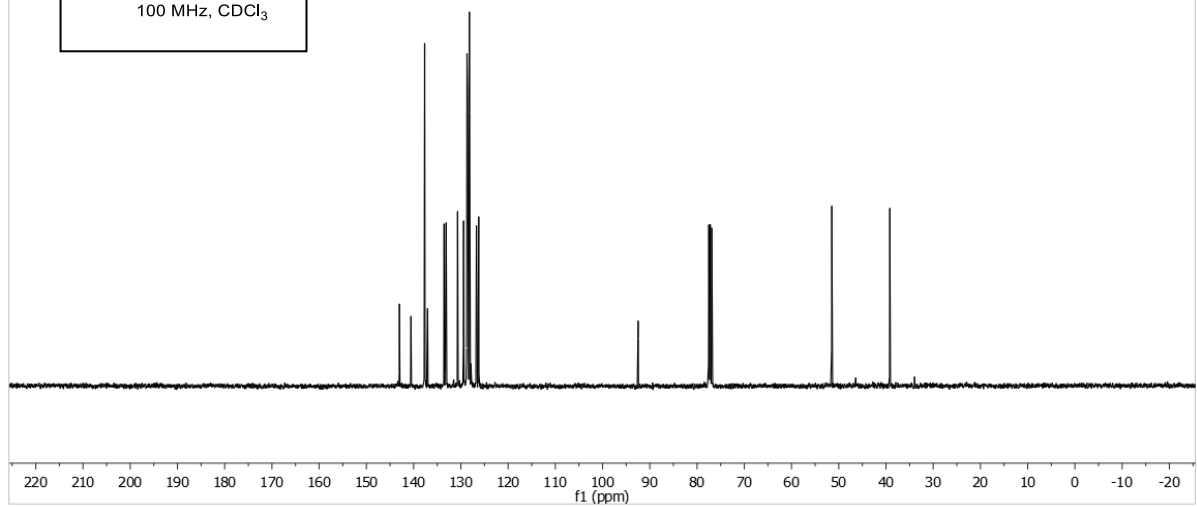

KVL-131  
 single pulse decoupled gated NOE  
 400 MHz, CDCl<sub>3</sub>

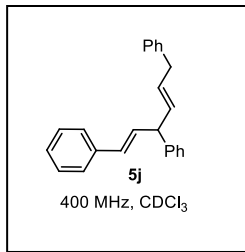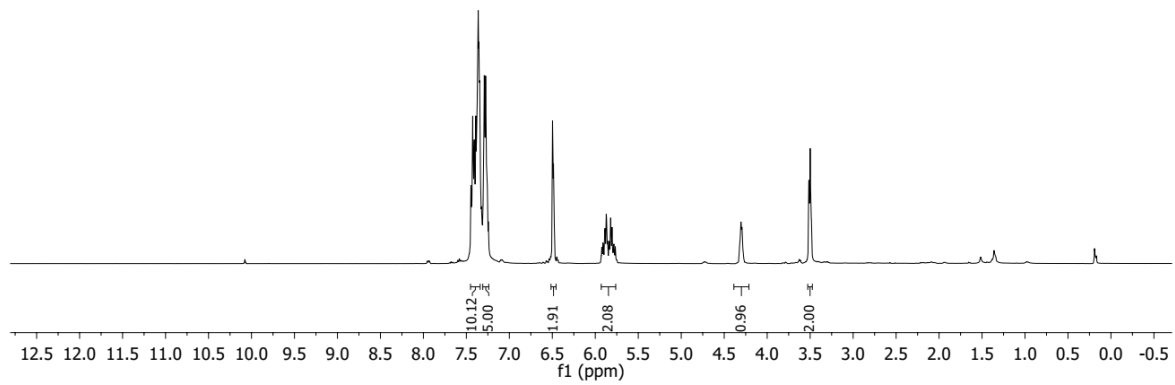

KVL-131  
 single pulse decoupled gated NOE

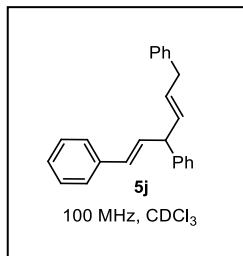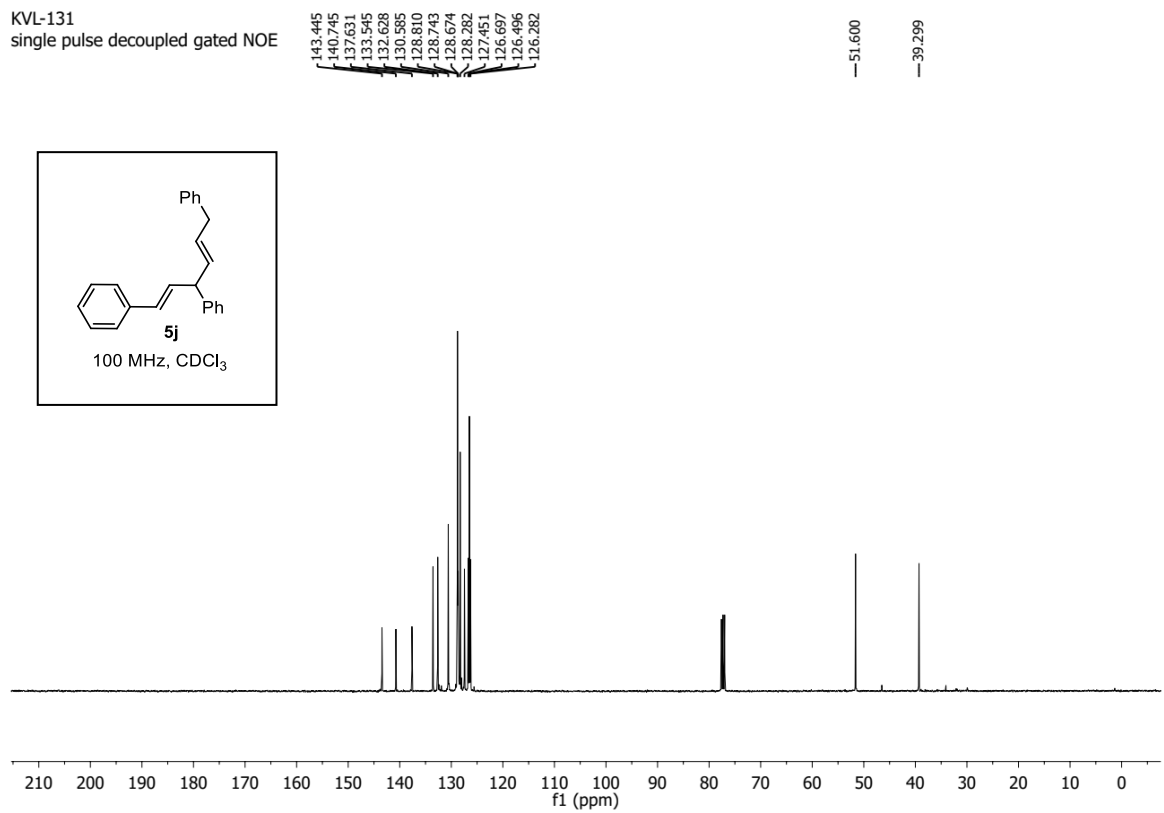

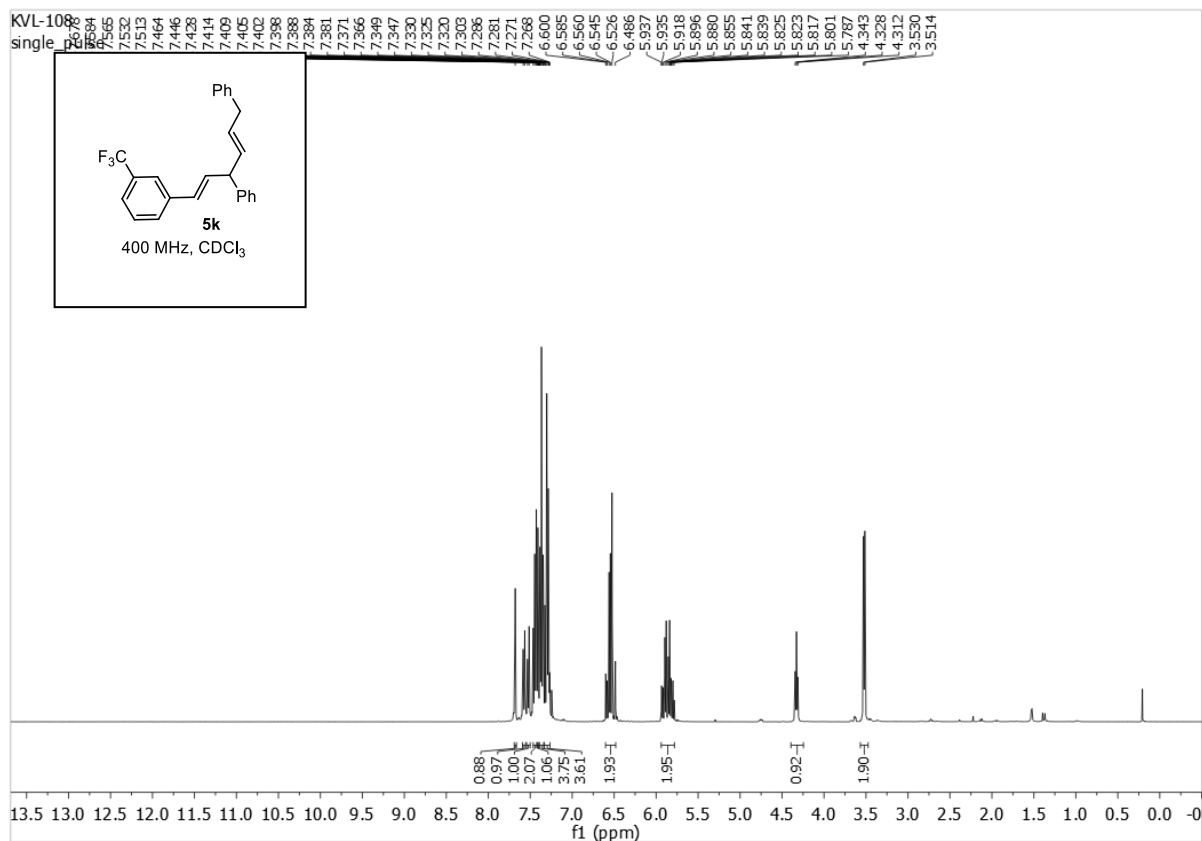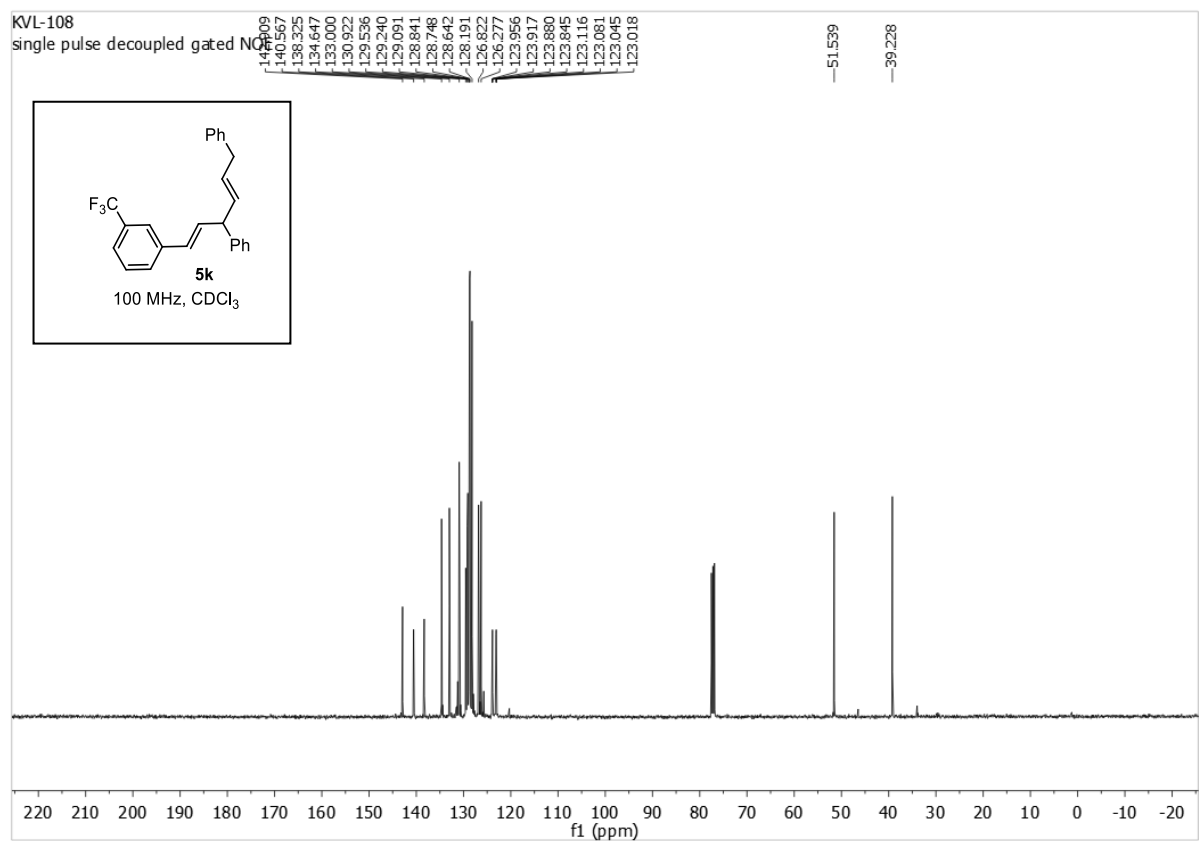



KVL-430  
single pulse

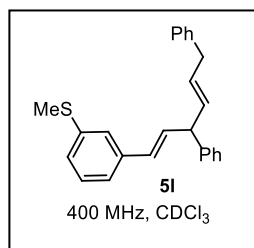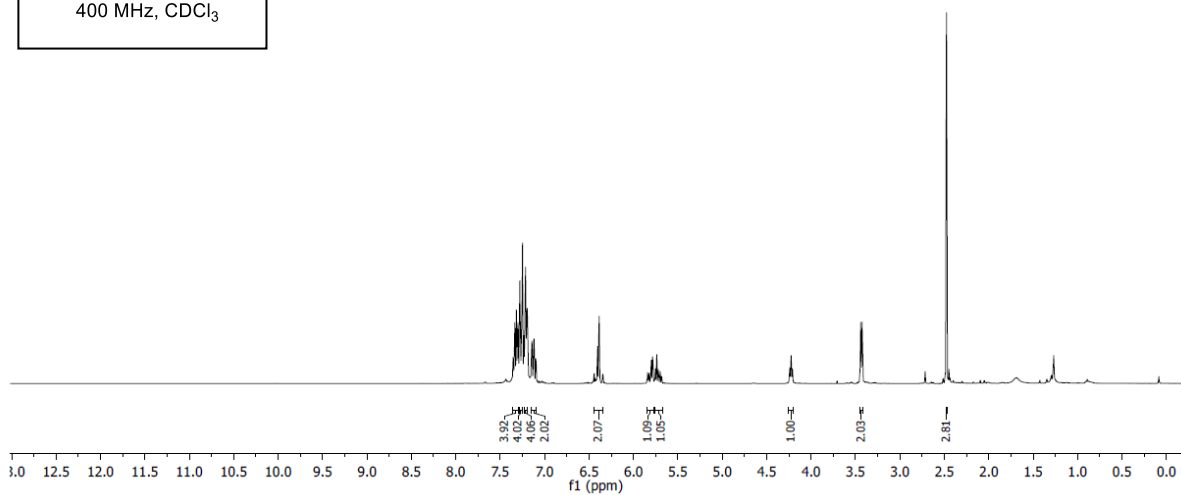

KVL-430  
single pulse decoupled gated NOE

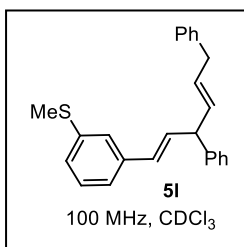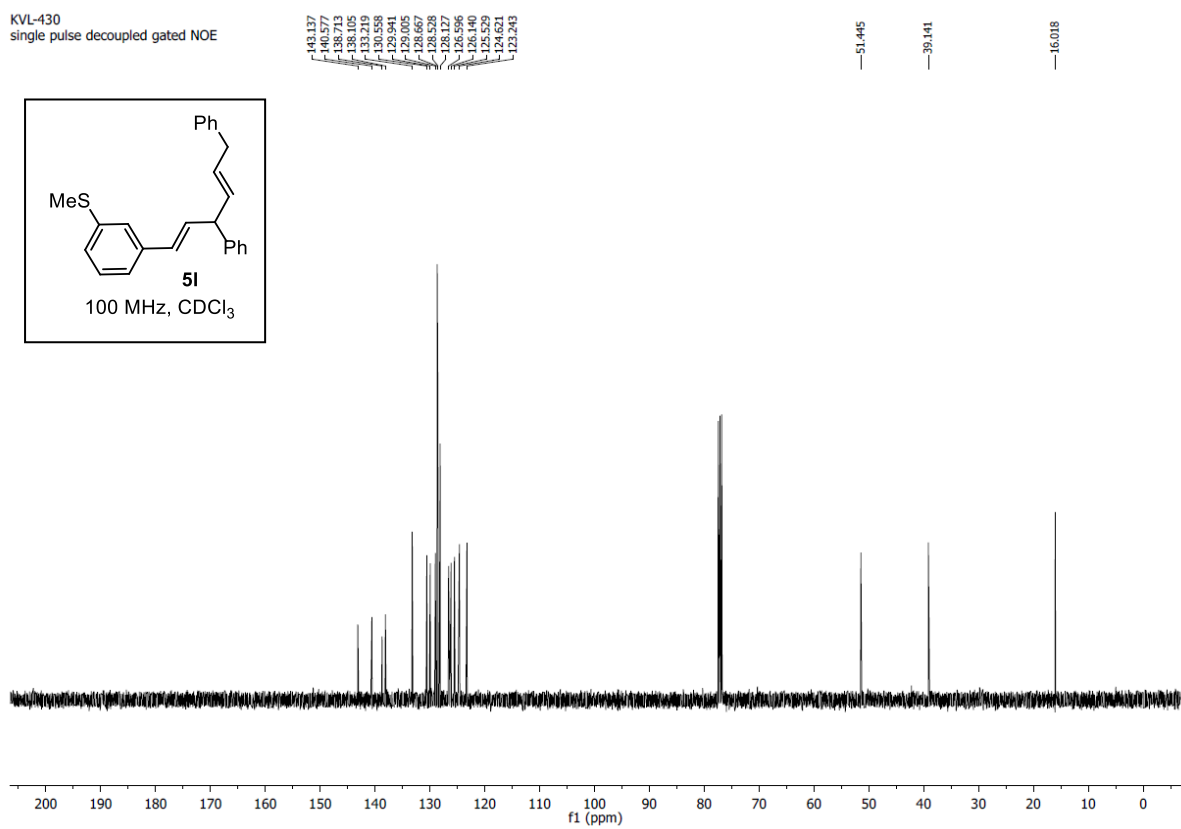

KV-124B  
 single pulse  
 159.910  
 143.265  
 140.624  
 138.979  
 133.344  
 132.843  
 130.493  
 130.363  
 129.581  
 128.675  
 128.542  
 128.156  
 126.578  
 126.148  
 119.060  
 113.060  
 111.624  
 55.319  
 51.443  
 39.165  
 7.346  
 7.342  
 7.325  
 7.310  
 7.308  
 7.295  
 7.293  
 7.254  
 7.248  
 7.240  
 7.236  
 7.229  
 7.226  
 7.224  
 7.216  
 7.211  
 6.998  
 6.979  
 6.977  
 6.931  
 6.929  
 6.810  
 6.808  
 6.803  
 6.789  
 6.785  
 6.783  
 6.436  
 6.432  
 6.426  
 6.424  
 6.420  
 5.873  
 5.871  
 5.867  
 5.856  
 5.854  
 5.850  
 5.835  
 5.832  
 5.829  
 5.826  
 5.818  
 5.816  
 5.812  
 5.785  
 5.779  
 5.771  
 5.769  
 5.767  
 5.762  
 5.755  
 5.753  
 5.750  
 5.746  
 5.731  
 5.729  
 5.714  
 4.262  
 4.255  
 4.240  
 3.820  
 3.468  
 3.452

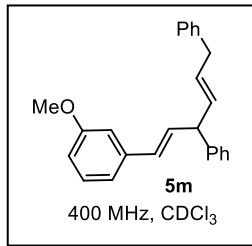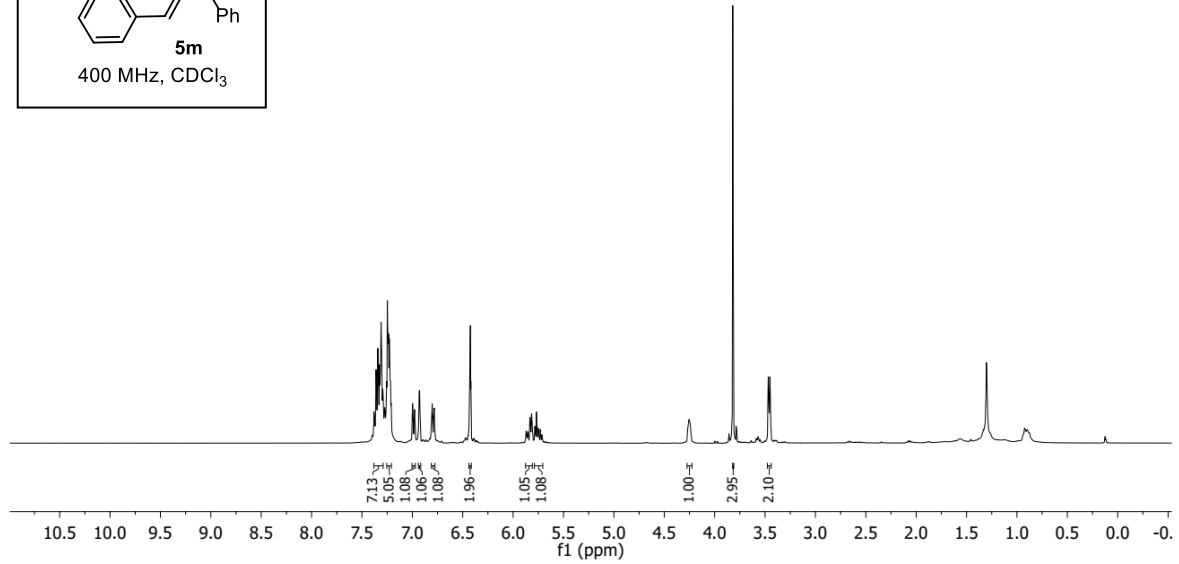

KV-124B

single pulse decoupled gated NOE

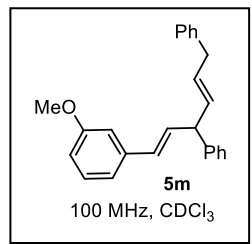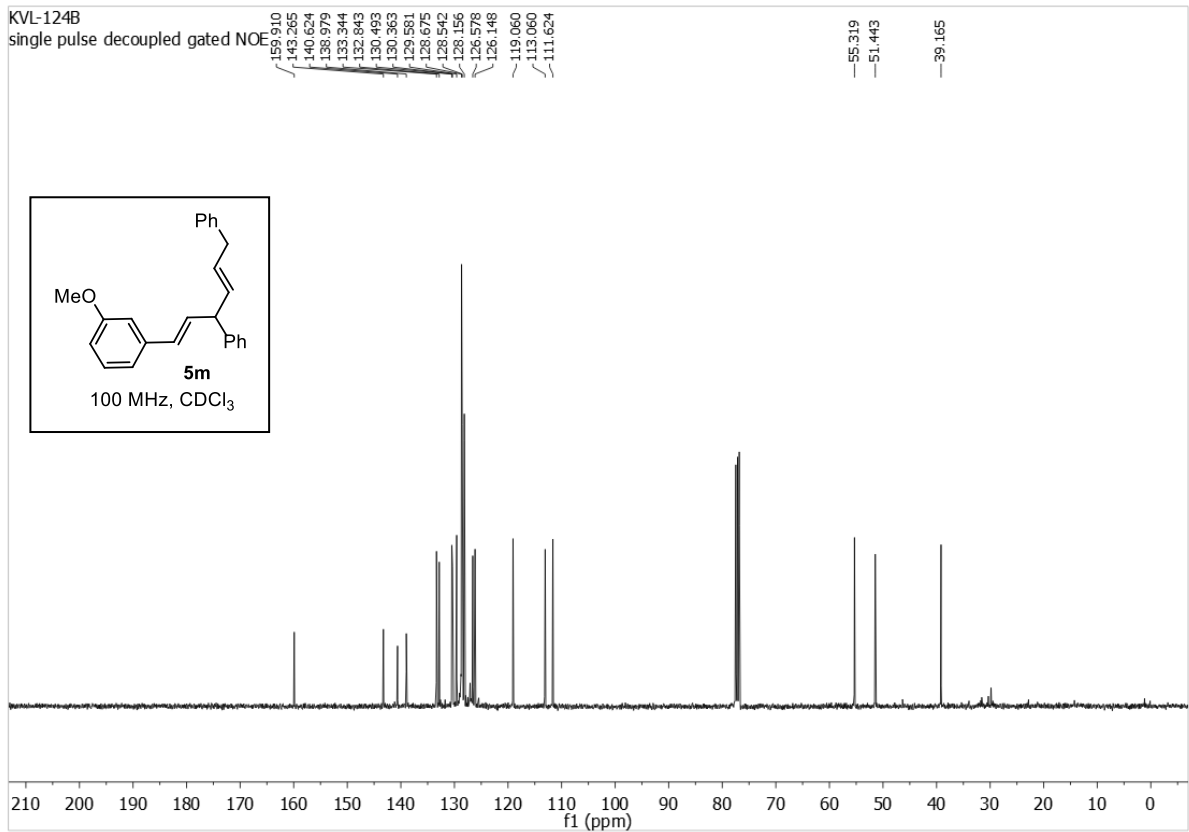

KVL-96R  
single\_pulse

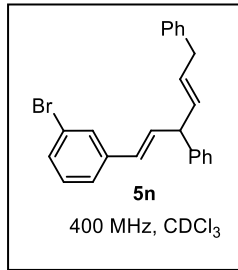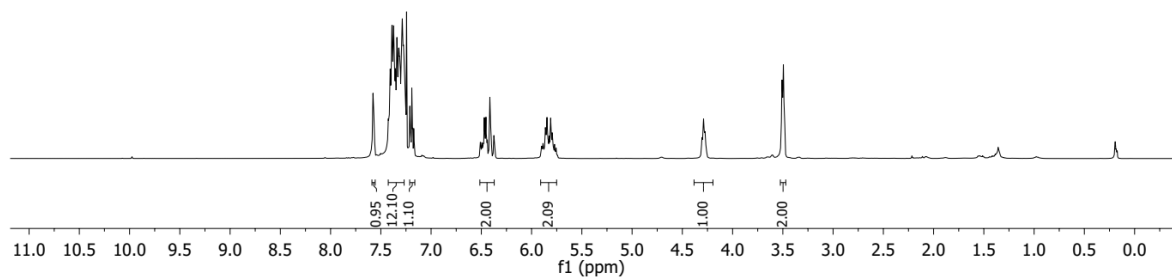

KVL-96  
single pulse decoupled gated

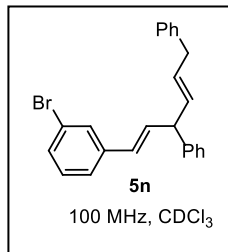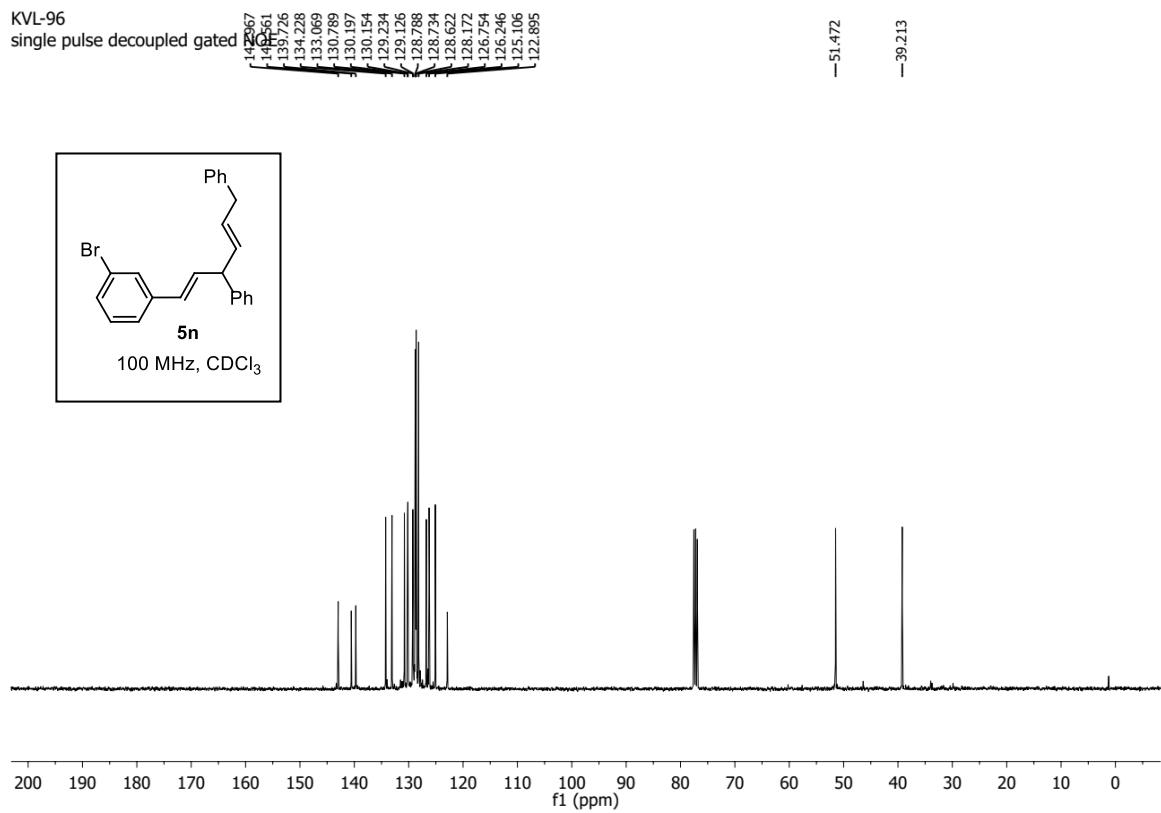

3/9

KVL-84 1H-NMR in CDCl<sub>3</sub>

7.2688  
7.2663  
7.1969  
7.1942  
7.1824  
7.1789  
7.1707  
7.1689  
7.1600  
7.1491  
7.1166  
7.0950  
7.0870  
7.0757  
6.4243  
6.4154  
6.4117  
6.4044  
6.3155  
6.3033  
6.2923  
6.2770  
6.2661  
6.2489  
6.2383  
6.2350  
6.2312  
6.2241  
5.7185  
5.7075  
5.6960  
5.6820  
5.6707  
5.6612  
5.6251  
5.6142  
5.6030  
5.5888  
5.5776  
5.5678  
4.1081  
4.0877  
4.0876  
3.6402  
3.6324  
3.6264  
3.3094  
3.2995

—0.0004

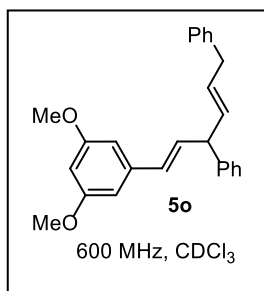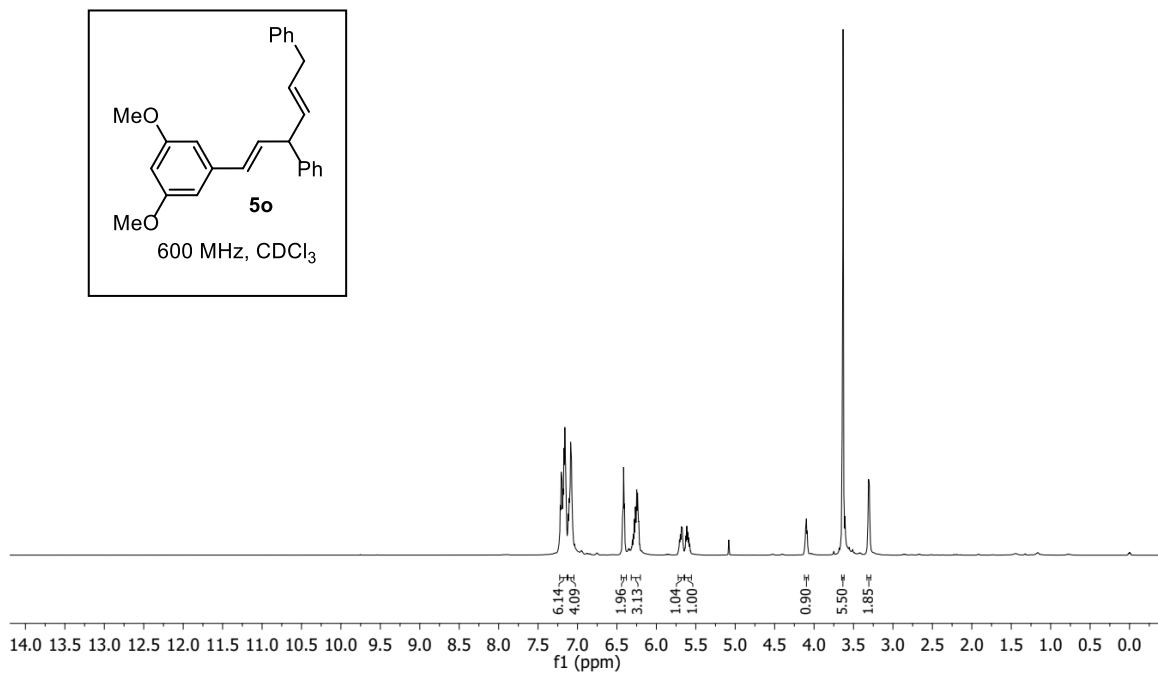

G:/10

KVL-84 13C-NMR in CDCl<sub>3</sub>

—160.955

143.156

140.549

139.486

133.225

132.991

130.493

130.408

128.636

128.497

128.119

126.552

126.107

—104.375

—99.695

—55.346

—51.362

—39.115

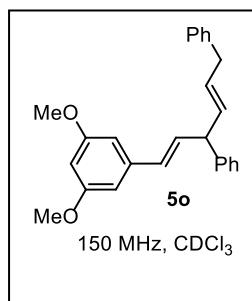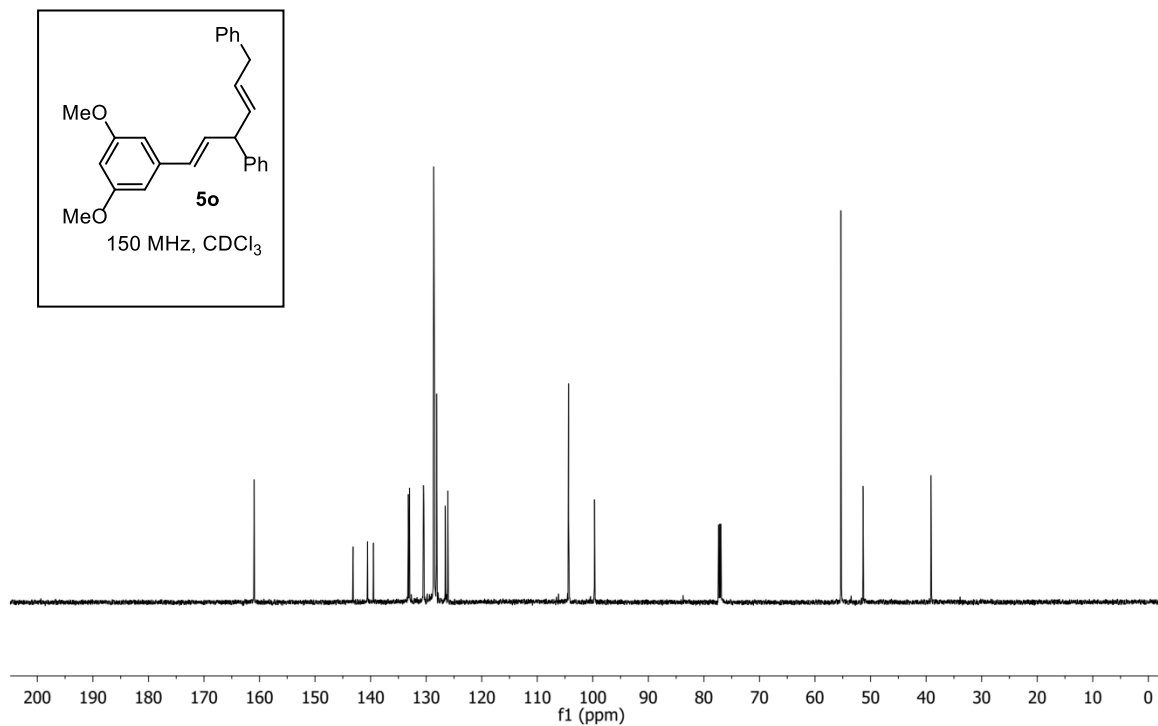

19-KVL-122/1

KVL-122 <sup>1</sup>H-NMR in CDCl<sub>3</sub>

7.319  
7.311  
7.3065  
7.3062  
7.3027  
7.3008  
7.3044  
7.3287  
7.3150  
7.3003  
7.2882  
7.2717  
7.2688  
7.2467  
6.5162  
6.5045  
6.4898  
6.4781  
6.3494  
6.3231  
5.8815  
5.8707  
5.8558  
5.8447  
5.8193  
5.8087  
5.7977  
5.7831  
5.7722  
4.2997  
4.2883  
4.2771  
3.5150  
3.5042

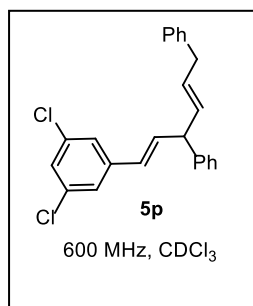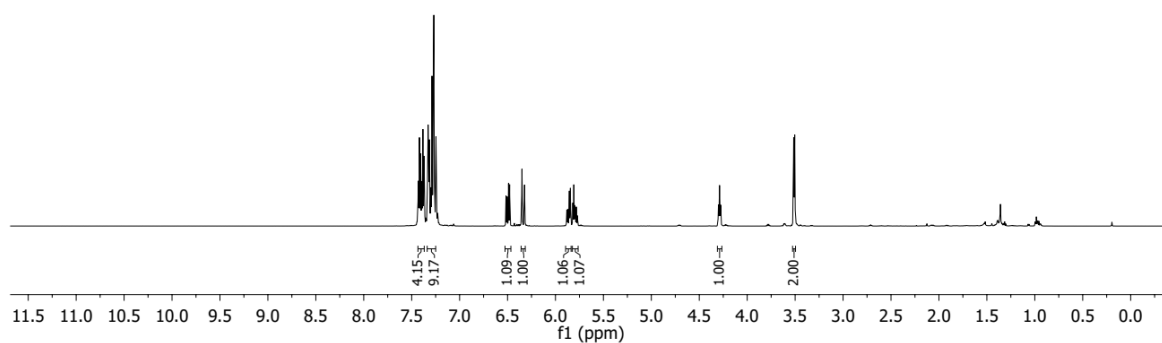

19-KVL-122/2

KVL-122 <sup>13</sup>C-NMR in CDCl<sub>3</sub>

142.495  
140.440  
140.350  
135.601  
135.060  
132.605  
130.954  
128.753  
128.632  
128.549  
128.545  
128.051  
128.001  
126.972  
126.777  
126.188  
124.660

51.340

39.120

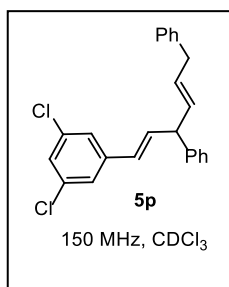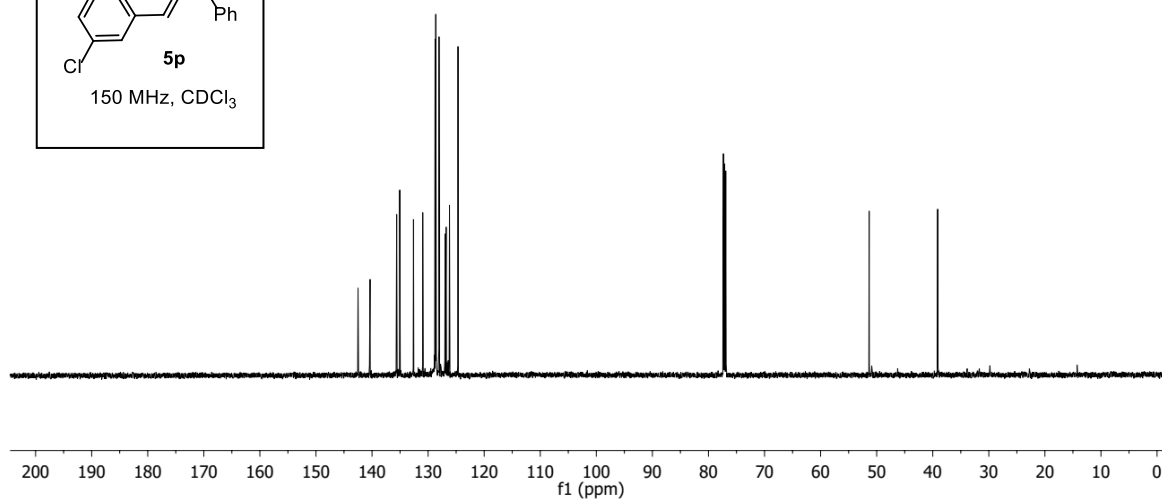

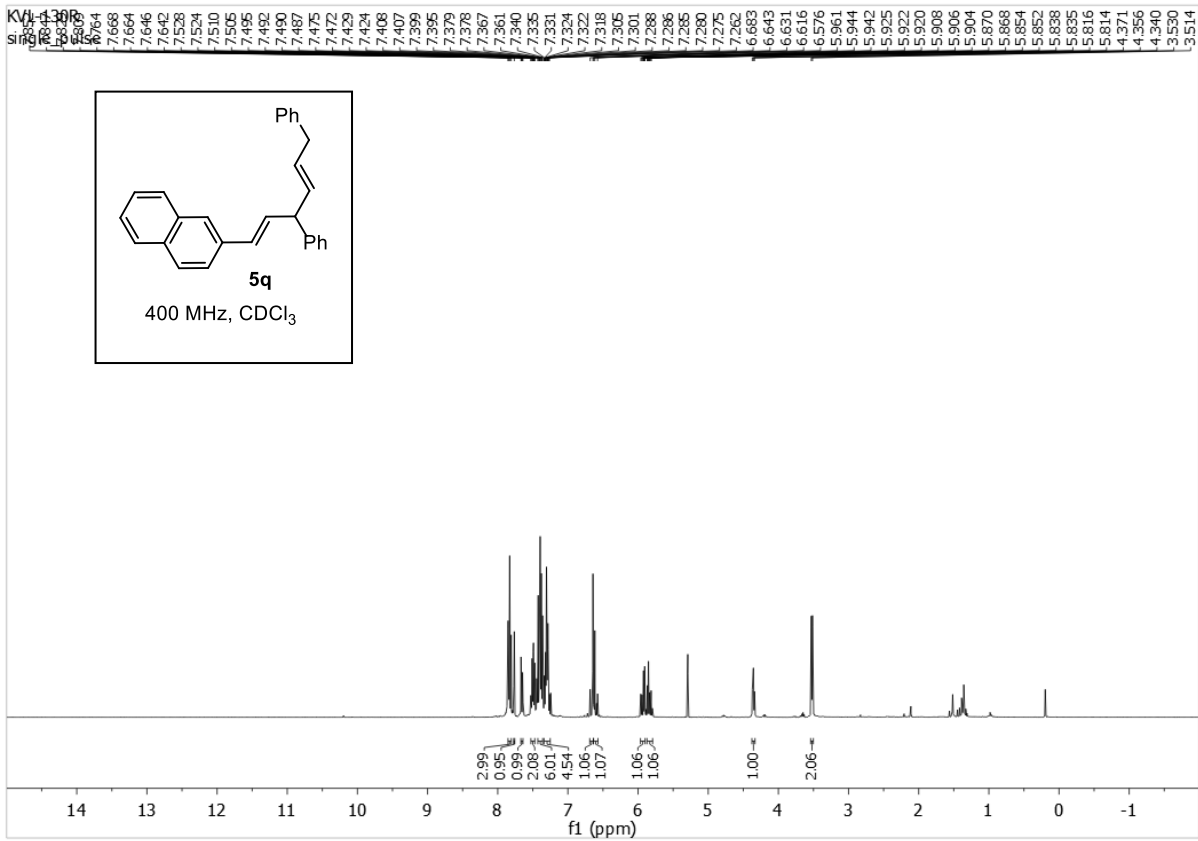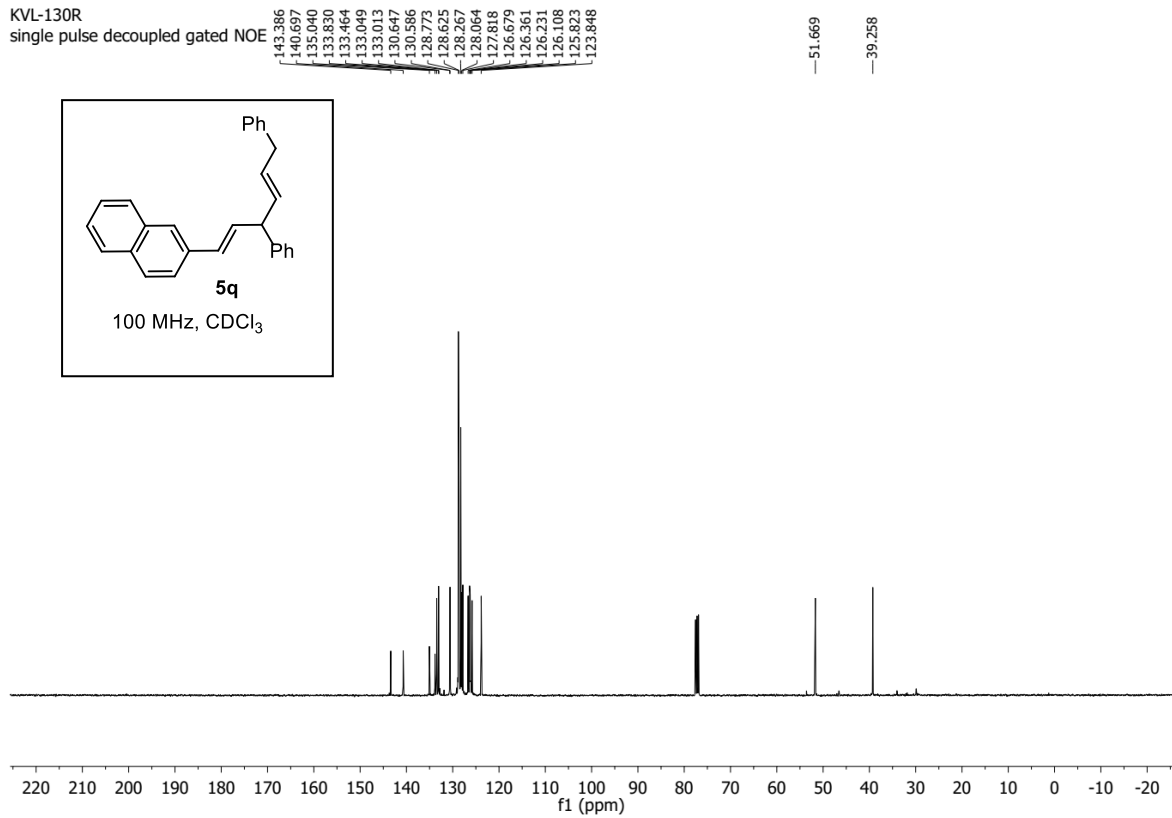

14.8764  
 14.0697  
 136.693  
 135.368  
 133.879  
 133.633  
 130.467  
 130.345  
 128.718  
 128.687  
 128.575  
 128.380  
 128.175  
 127.286  
 126.572  
 126.174  
 125.728  
 51.725  
 39.199  
 19.964  
 7.5042  
 7.4885  
 7.4716  
 7.4615  
 7.4125  
 7.4107  
 7.4088  
 7.3977  
 7.3922  
 7.3743  
 7.3724  
 7.3556  
 7.3368  
 7.3352  
 7.3132  
 7.3047  
 7.3006  
 7.2823  
 7.2621  
 7.2606  
 7.1949  
 7.1889  
 7.1860  
 6.7206  
 6.6813  
 6.3817  
 6.3779  
 6.3738  
 6.3717  
 6.3643  
 6.3604  
 6.3564  
 6.3541  
 6.3423  
 6.3384  
 6.3345  
 6.3322  
 6.3248  
 6.3210  
 6.3171  
 6.3147  
 5.9081  
 5.9058  
 5.8914  
 5.8895  
 5.8763  
 5.8698  
 5.8675  
 5.8548  
 5.8532  
 5.8512  
 5.8258  
 5.8240  
 5.8147  
 5.8121  
 5.8104  
 5.8083  
 5.7985  
 5.7941  
 5.7920  
 5.7739  
 5.7721  
 5.7701  
 4.3304  
 4.3142  
 4.2977  
 3.4983  
 3.4826  
 2.3725

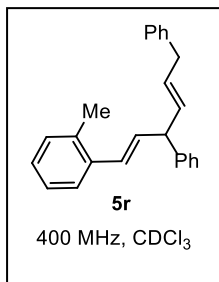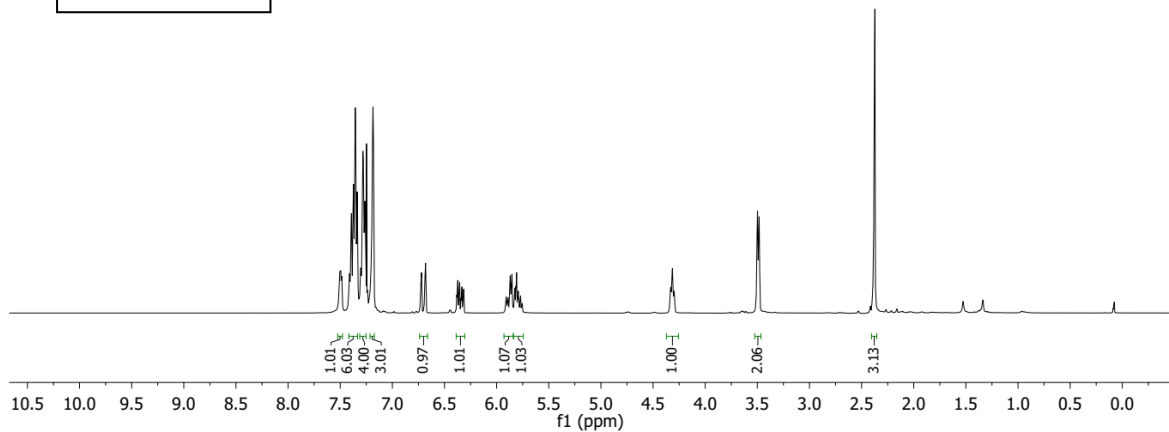

KVL-389

single pulse decoupled gated NO

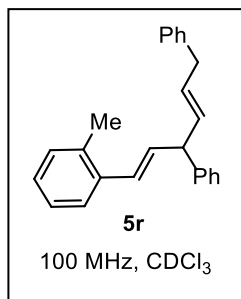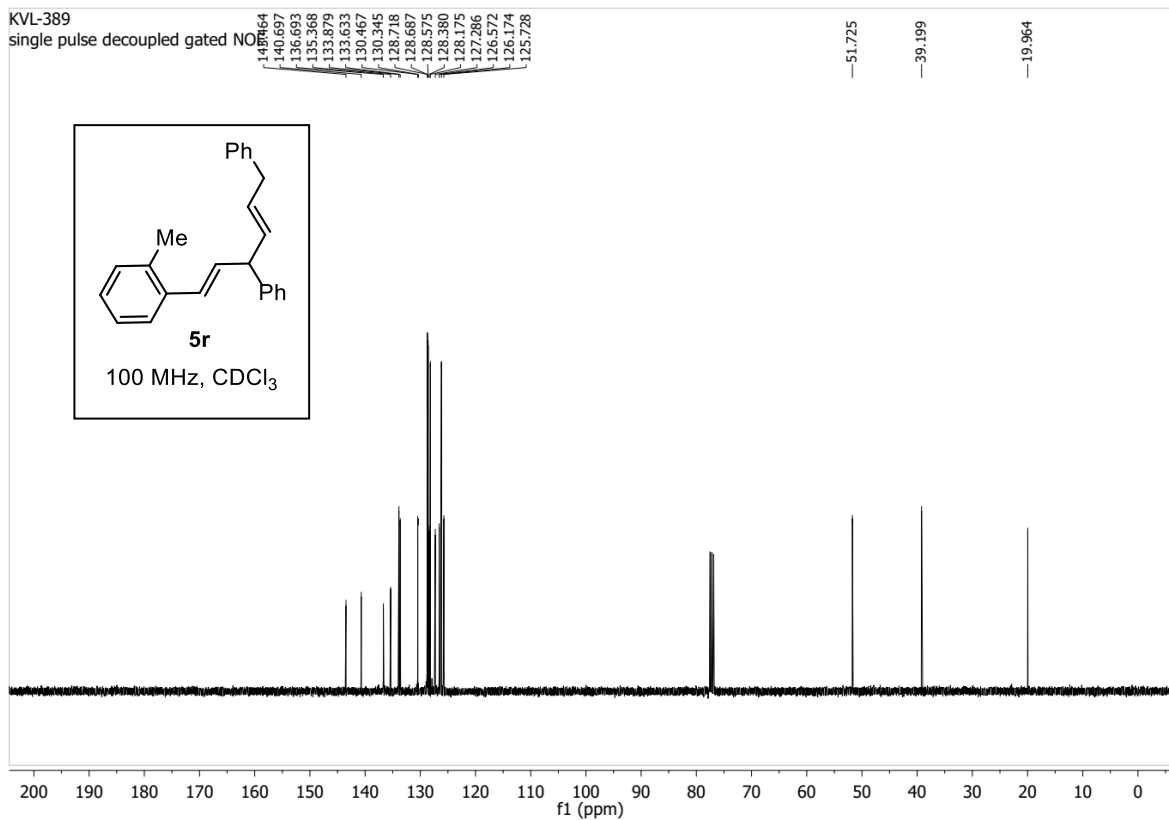

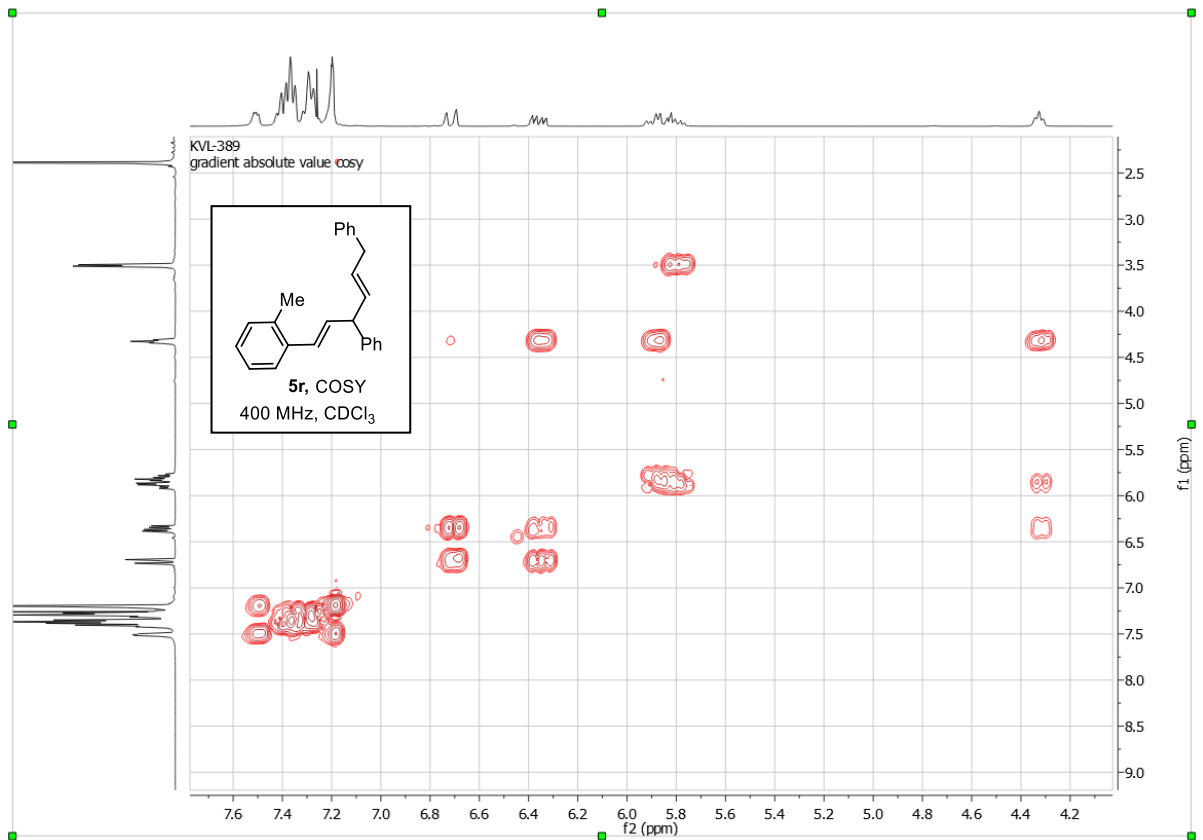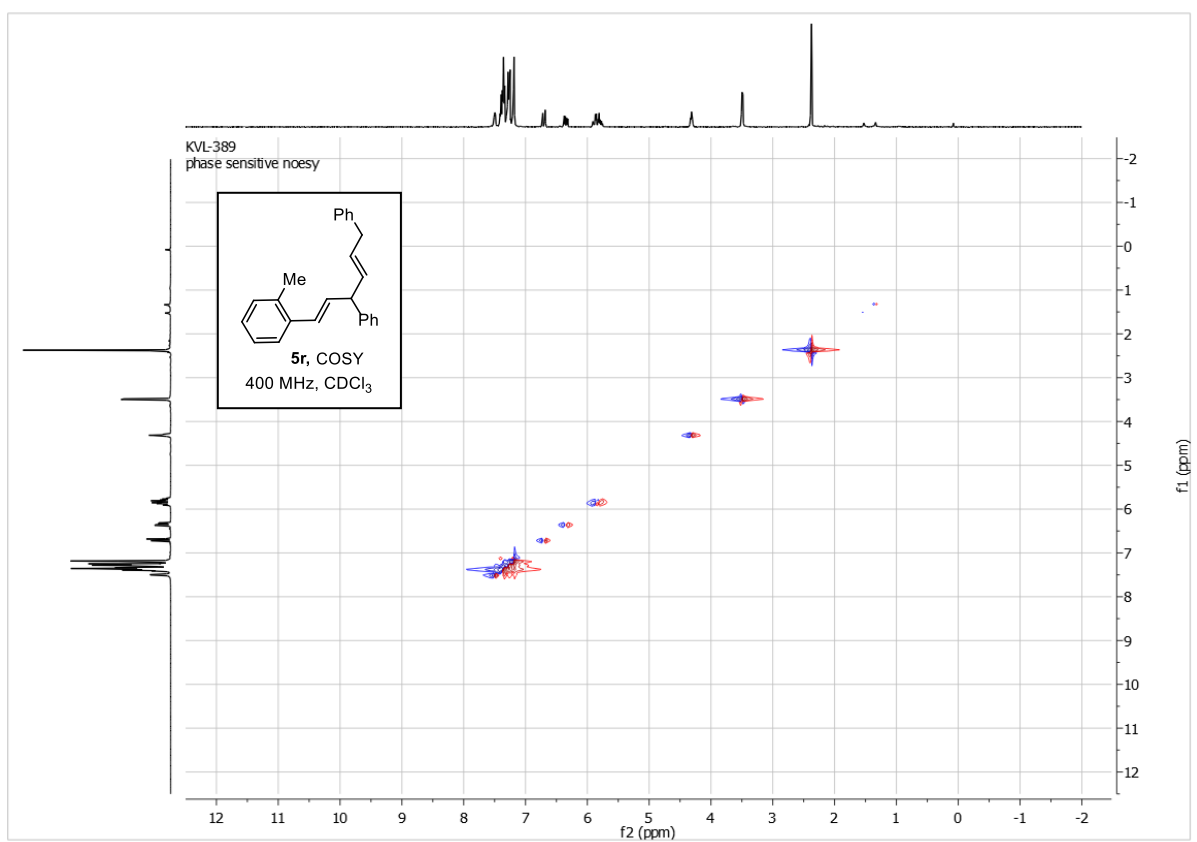



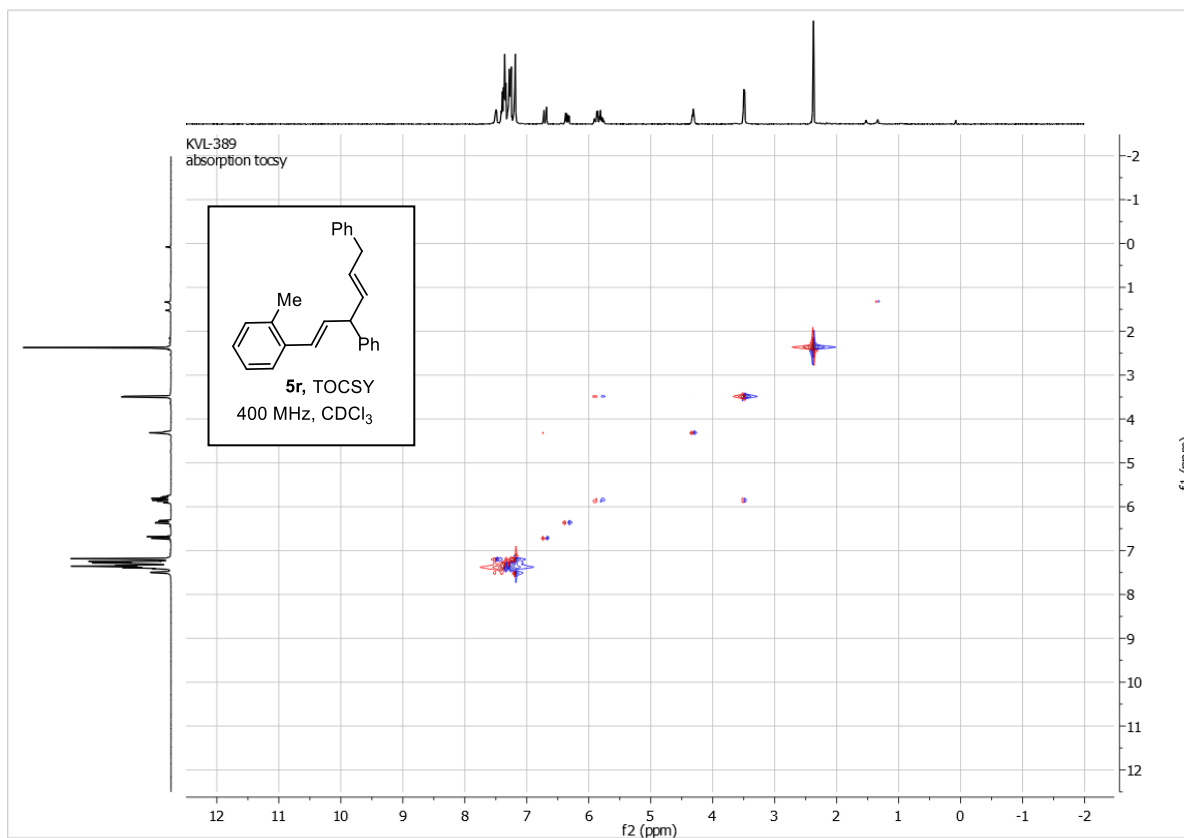

KVL-389  
DEPT with decoupling

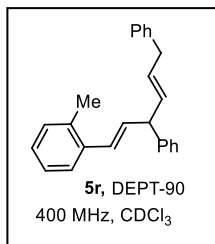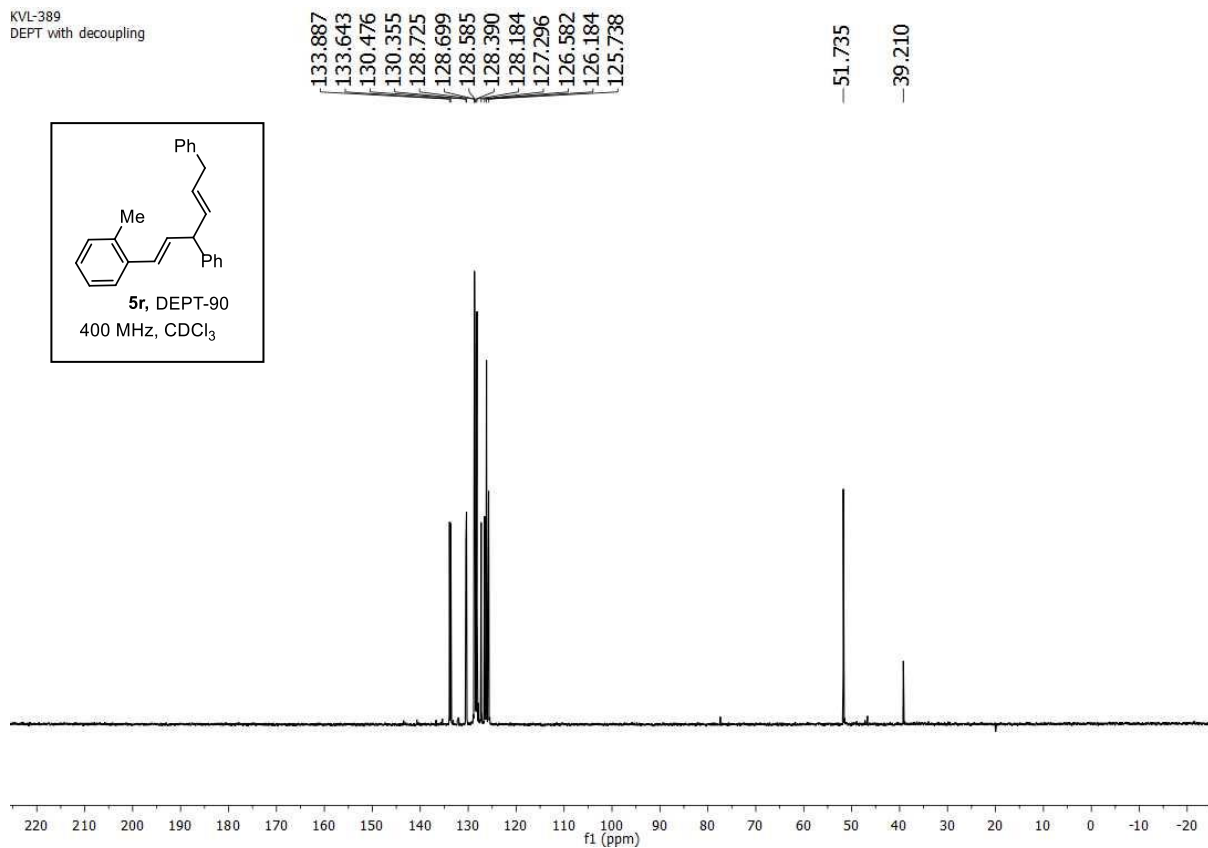

KVL-389  
DEPT with decoupling

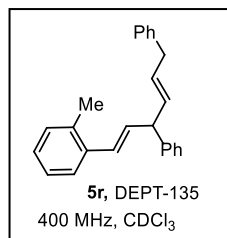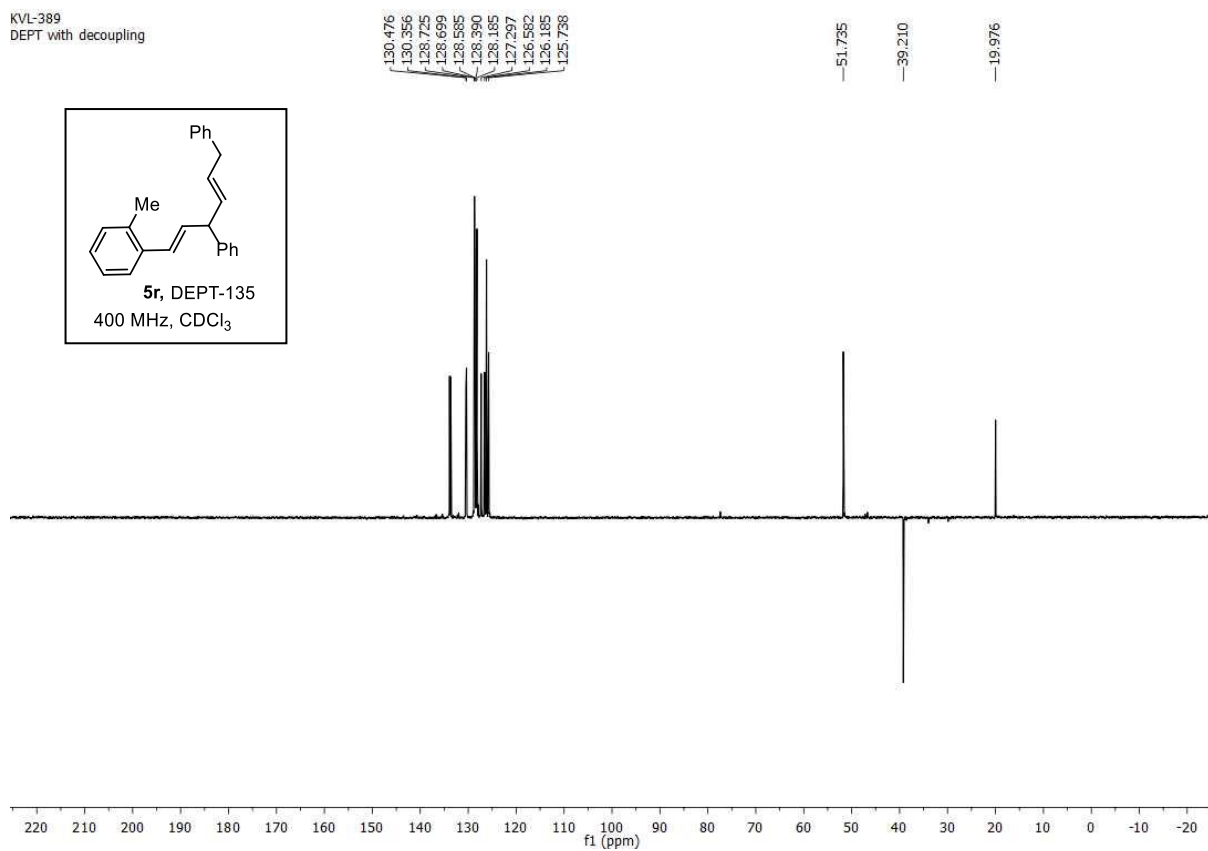

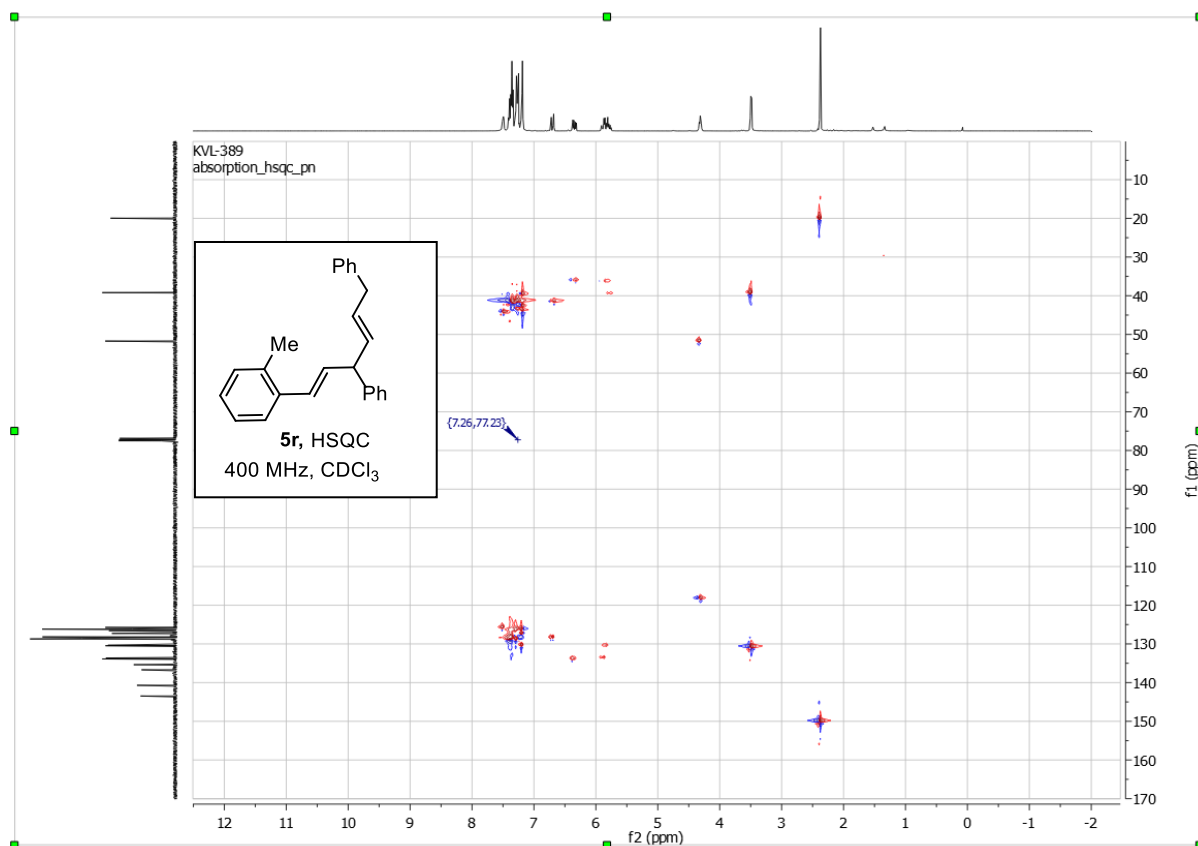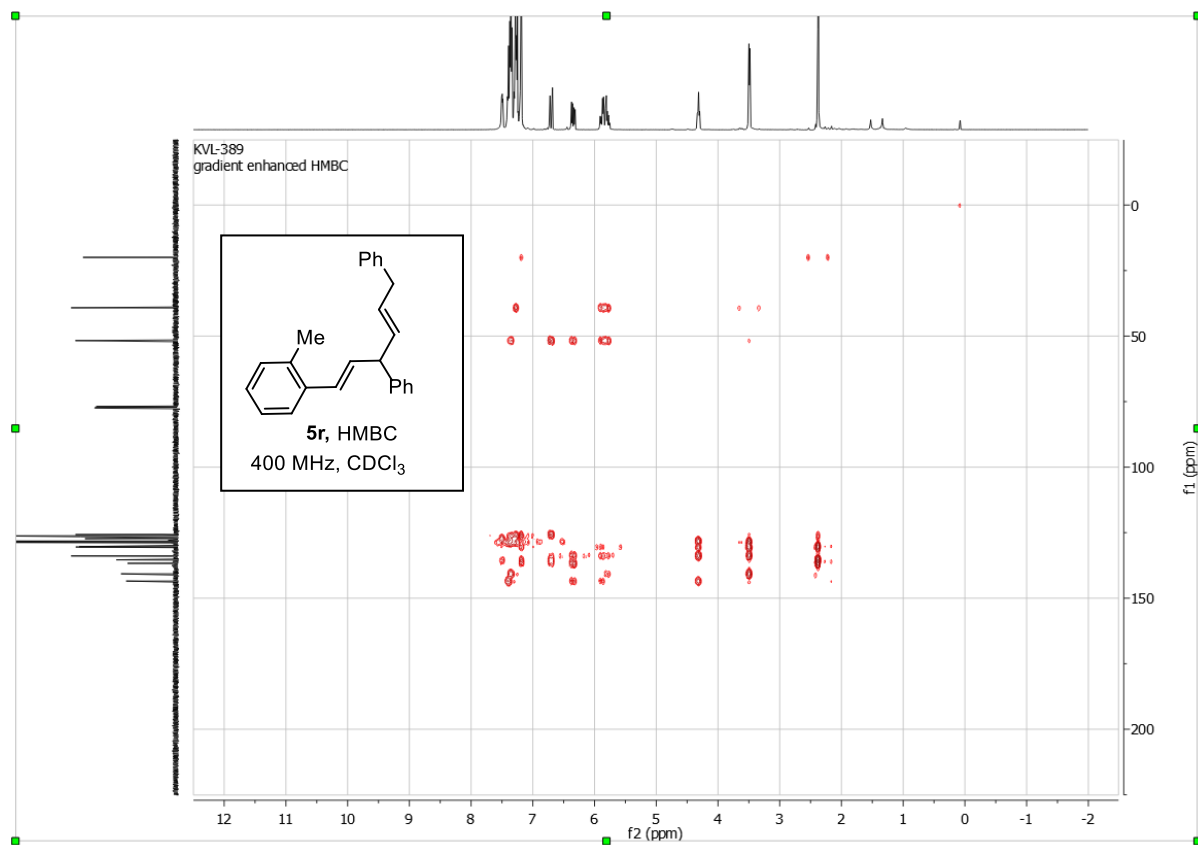

7.376  
 7.384  
 7.387  
 7.389  
 7.390  
 7.392  
 7.394  
 7.395  
 7.396  
 7.397  
 7.398  
 7.399  
 7.400  
 7.401  
 7.402  
 7.403  
 7.404  
 7.405  
 7.406  
 7.407  
 7.408  
 7.409  
 7.410  
 7.411  
 7.412  
 7.413  
 7.414  
 7.415  
 7.416  
 7.417  
 7.418  
 7.419  
 7.420  
 7.421  
 7.422  
 7.423  
 7.424  
 7.425  
 7.426  
 7.427  
 7.428  
 7.429  
 7.430  
 7.431  
 7.432  
 7.433  
 7.434  
 7.435  
 7.436  
 7.437  
 7.438  
 7.439  
 7.440  
 7.441  
 7.442  
 7.443  
 7.444  
 7.445  
 7.446  
 7.447  
 7.448  
 7.449  
 7.450  
 7.451  
 7.452  
 7.453  
 7.454  
 7.455  
 7.456  
 7.457  
 7.458  
 7.459  
 7.460  
 7.461  
 7.462  
 7.463  
 7.464  
 7.465  
 7.466  
 7.467  
 7.468  
 7.469  
 7.470  
 7.471  
 7.472  
 7.473  
 7.474  
 7.475  
 7.476  
 7.477  
 7.478  
 7.479  
 7.480  
 7.481  
 7.482  
 7.483  
 7.484  
 7.485  
 7.486  
 7.487  
 7.488  
 7.489  
 7.490  
 7.491  
 7.492  
 7.493  
 7.494  
 7.495  
 7.496  
 7.497  
 7.498  
 7.499  
 7.500  
 7.501  
 7.502  
 7.503  
 7.504  
 7.505  
 7.506  
 7.507  
 7.508  
 7.509  
 7.510  
 7.511  
 7.512  
 7.513  
 7.514  
 7.515  
 7.516  
 7.517  
 7.518  
 7.519  
 7.520  
 7.521  
 7.522  
 7.523  
 7.524  
 7.525  
 7.526  
 7.527  
 7.528  
 7.529  
 7.530  
 7.531  
 7.532  
 7.533  
 7.534  
 7.535  
 7.536  
 7.537  
 7.538  
 7.539  
 7.540  
 7.541  
 7.542  
 7.543  
 7.544  
 7.545  
 7.546  
 7.547  
 7.548  
 7.549  
 7.550  
 7.551  
 7.552  
 7.553  
 7.554  
 7.555  
 7.556  
 7.557  
 7.558  
 7.559  
 7.560  
 7.561  
 7.562  
 7.563  
 7.564  
 7.565  
 7.566  
 7.567  
 7.568  
 7.569  
 7.570  
 7.571  
 7.572  
 7.573  
 7.574  
 7.575  
 7.576  
 7.577  
 7.578  
 7.579  
 7.580  
 7.581  
 7.582  
 7.583  
 7.584  
 7.585  
 7.586  
 7.587  
 7.588  
 7.589  
 7.590  
 7.591  
 7.592  
 7.593  
 7.594  
 7.595  
 7.596  
 7.597  
 7.598  
 7.599  
 7.600  
 7.601  
 7.602  
 7.603  
 7.604  
 7.605  
 7.606  
 7.607  
 7.608  
 7.609  
 7.610  
 7.611  
 7.612  
 7.613  
 7.614  
 7.615  
 7.616  
 7.617  
 7.618  
 7.619  
 7.620  
 7.621  
 7.622  
 7.623  
 7.624  
 7.625  
 7.626  
 7.627  
 7.628  
 7.629  
 7.630  
 7.631  
 7.632  
 7.633  
 7.634  
 7.635  
 7.636  
 7.637  
 7.638  
 7.639  
 7.640  
 7.641  
 7.642  
 7.643  
 7.644  
 7.645  
 7.646  
 7.647  
 7.648  
 7.649  
 7.650  
 7.651  
 7.652  
 7.653  
 7.654  
 7.655  
 7.656  
 7.657  
 7.658  
 7.659  
 7.660  
 7.661  
 7.662  
 7.663  
 7.664  
 7.665  
 7.666  
 7.667  
 7.668  
 7.669  
 7.670  
 7.671  
 7.672  
 7.673  
 7.674  
 7.675  
 7.676  
 7.677  
 7.678  
 7.679  
 7.680  
 7.681  
 7.682  
 7.683  
 7.684  
 7.685  
 7.686  
 7.687  
 7.688  
 7.689  
 7.690  
 7.691  
 7.692  
 7.693  
 7.694  
 7.695  
 7.696  
 7.697  
 7.698  
 7.699  
 7.700  
 7.701  
 7.702  
 7.703  
 7.704  
 7.705  
 7.706  
 7.707  
 7.708  
 7.709  
 7.710  
 7.711  
 7.712  
 7.713  
 7.714  
 7.715  
 7.716  
 7.717  
 7.718  
 7.719  
 7.720  
 7.721  
 7.722  
 7.723  
 7.724  
 7.725  
 7.726  
 7.727  
 7.728  
 7.729  
 7.730  
 7.731  
 7.732  
 7.733  
 7.734  
 7.735  
 7.736  
 7.737  
 7.738  
 7.739  
 7.740  
 7.741  
 7.742  
 7.743  
 7.744  
 7.745  
 7.746  
 7.747  
 7.748  
 7.749  
 7.750  
 7.751  
 7.752  
 7.753  
 7.754  
 7.755  
 7.756  
 7.757  
 7.758  
 7.759  
 7.760  
 7.761  
 7.762  
 7.763  
 7.764  
 7.765  
 7.766  
 7.767  
 7.768  
 7.769  
 7.770  
 7.771  
 7.772  
 7.773  
 7.774  
 7.775  
 7.776  
 7.777  
 7.778  
 7.779  
 7.780  
 7.781  
 7.782  
 7.783  
 7.784  
 7.785  
 7.786  
 7.787  
 7.788  
 7.789  
 7.790  
 7.791  
 7.792  
 7.793  
 7.794  
 7.795  
 7.796  
 7.797  
 7.798  
 7.799  
 7.800  
 7.801  
 7.802  
 7.803  
 7.804  
 7.805  
 7.806  
 7.807  
 7.808  
 7.809  
 7.810  
 7.811  
 7.812  
 7.813  
 7.814  
 7.815  
 7.816  
 7.817  
 7.818  
 7.819  
 7.820  
 7.821  
 7.822  
 7.823  
 7.824  
 7.825  
 7.826  
 7.827  
 7.828  
 7.829  
 7.830  
 7.831  
 7.832  
 7.833  
 7.834  
 7.835  
 7.836  
 7.837  
 7.838  
 7.839  
 7.840  
 7.841  
 7.842  
 7.843  
 7.844  
 7.845  
 7.846  
 7.847  
 7.848  
 7.849  
 7.850  
 7.851  
 7.852  
 7.853  
 7.854  
 7.855  
 7.856  
 7.857  
 7.858  
 7.859  
 7.860  
 7.861  
 7.862  
 7.863  
 7.864  
 7.865  
 7.866  
 7.867  
 7.868  
 7.869  
 7.870  
 7.871  
 7.872  
 7.873  
 7.874  
 7.875  
 7.876  
 7.877  
 7.878  
 7.879  
 7.880  
 7.881  
 7.882  
 7.883  
 7.884  
 7.885  
 7.886  
 7.887  
 7.888  
 7.889  
 7.890  
 7.891  
 7.892  
 7.893  
 7.894  
 7.895  
 7.896  
 7.897  
 7.898  
 7.899  
 7.900  
 7.901  
 7.902  
 7.903  
 7.904  
 7.905  
 7.906  
 7.907  
 7.908  
 7.909  
 7.910  
 7.911  
 7.912  
 7.913  
 7.914  
 7.915  
 7.916  
 7.917  
 7.918  
 7.919  
 7.920  
 7.921  
 7.922  
 7.923  
 7.924  
 7.925  
 7.926  
 7.927  
 7.928  
 7.929  
 7.930  
 7.931  
 7.932  
 7.933  
 7.934  
 7.935  
 7.936  
 7.937  
 7.938  
 7.939  
 7.940  
 7.941  
 7.942  
 7.943  
 7.944  
 7.945  
 7.946  
 7.947  
 7.948  
 7.949  
 7.950  
 7.951  
 7.952  
 7.953  
 7.954  
 7.955  
 7.956  
 7.957  
 7.958  
 7.959  
 7.960  
 7.961  
 7.962  
 7.963  
 7.964  
 7.965  
 7.966  
 7.967  
 7.968  
 7.969  
 7.970  
 7.971  
 7.972  
 7.973  
 7.974  
 7.975  
 7.976  
 7.977  
 7.978  
 7.979  
 7.980  
 7.981  
 7.982  
 7.983  
 7.984  
 7.985  
 7.986  
 7.987  
 7.988  
 7.989  
 7.990  
 7.991  
 7.992  
 7.993  
 7.994  
 7.995  
 7.996  
 7.997  
 7.998  
 7.999  
 8.000

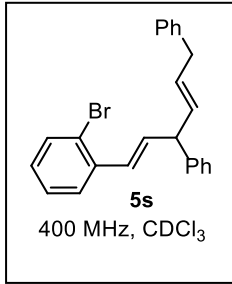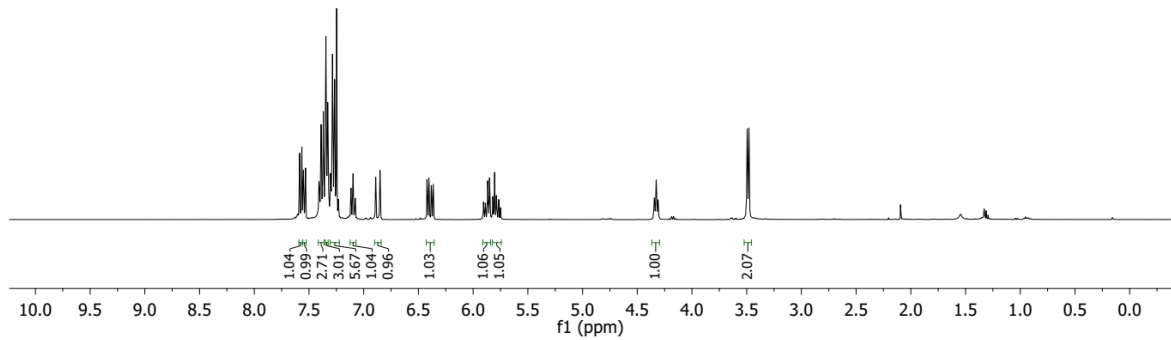

KVL-124C  
 single pulse decoupled gated NO

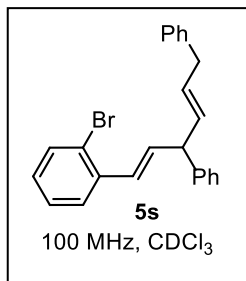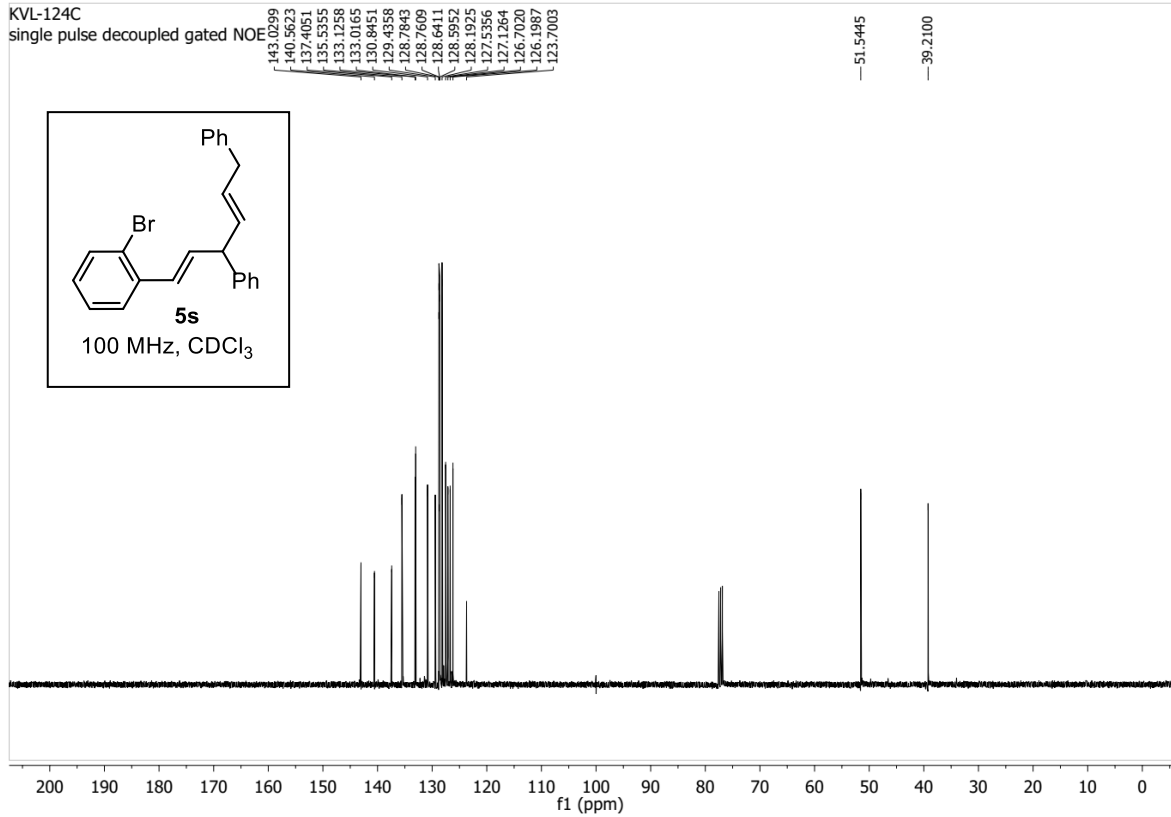

KVL-129  
single\_pulse

8.1136  
8.0947  
7.8910  
7.8703  
7.8043  
7.7840  
7.6444  
7.6265  
7.5613  
7.5419  
7.5331  
7.5225  
7.5023  
7.4834  
7.4639  
7.4438  
7.4340  
7.4142  
7.3992  
7.3833  
7.3632  
7.3451  
7.3179  
7.3022  
7.2833  
7.2646  
7.2464  
7.2081  
6.5271  
6.5101  
6.4881  
6.4709  
5.9717  
5.9552  
5.9327  
5.9162  
5.8834  
5.8674  
5.8507  
5.8291  
5.8127  
4.4279  
4.4112  
4.3945  
3.5222  
3.5062

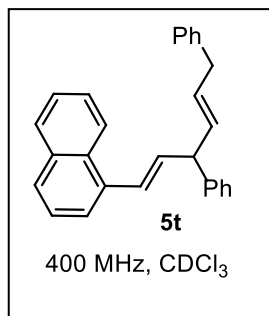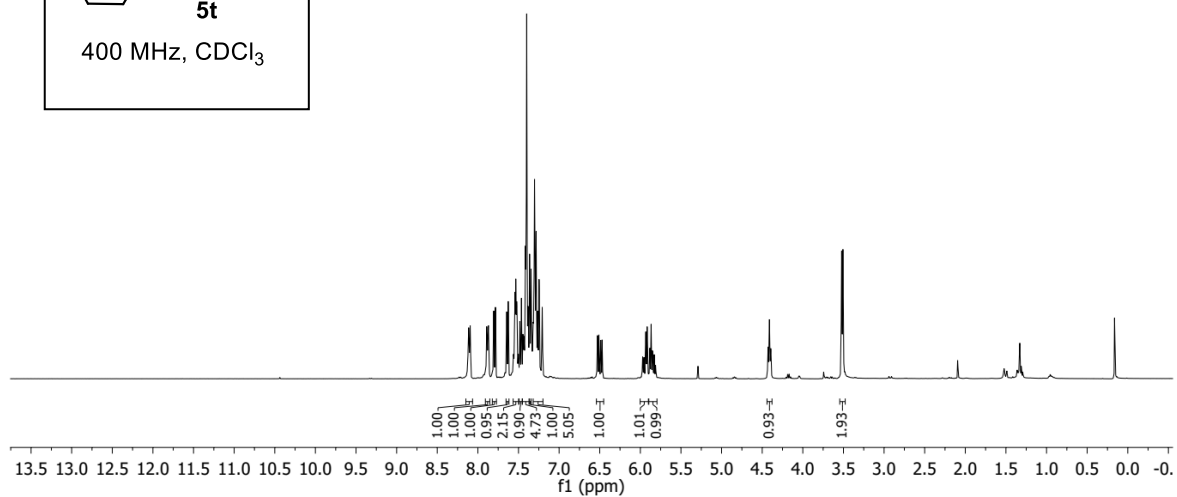

KVL-129

single pulse decoupled gated NO

145.942  
140.714  
135.811  
135.368  
133.767  
133.563  
131.354  
130.683  
128.754  
128.617  
128.257  
127.766  
126.657  
126.206  
126.063  
125.937  
123.770  
124.015  
123.852

51.808

39.233

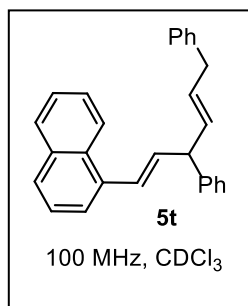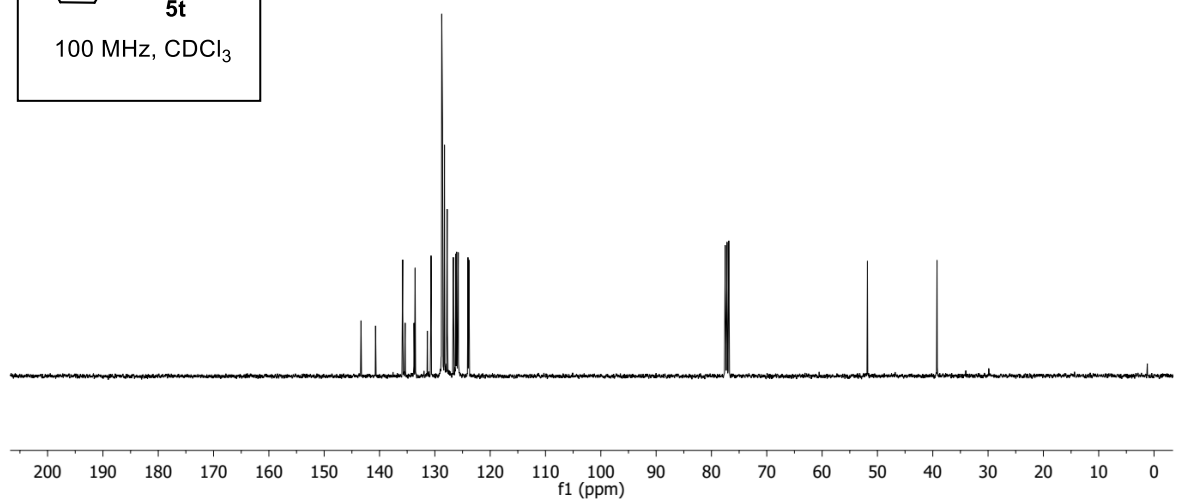

KKP-223  
single\_pulse

5.777  
5.774  
5.771  
5.760  
5.757  
5.755  
5.739  
5.736  
5.733  
5.722  
5.719  
5.716  
5.675  
5.673  
5.659  
5.657  
5.643  
5.640  
5.637  
5.635  
5.624  
5.621  
5.618  
5.607  
5.604  
5.602  
5.585  
5.583  
5.568  
5.566  
5.512  
5.510  
5.496  
5.494  
5.473  
5.471  
5.458  
5.455  
4.034  
4.017  
4.001  
3.426  
3.410  
2.383  
2.367  
2.350  
2.334  
2.317  
2.300  
2.284  
2.267  
1.029  
1.020  
1.012  
1.003

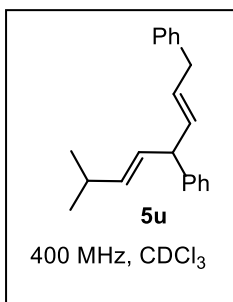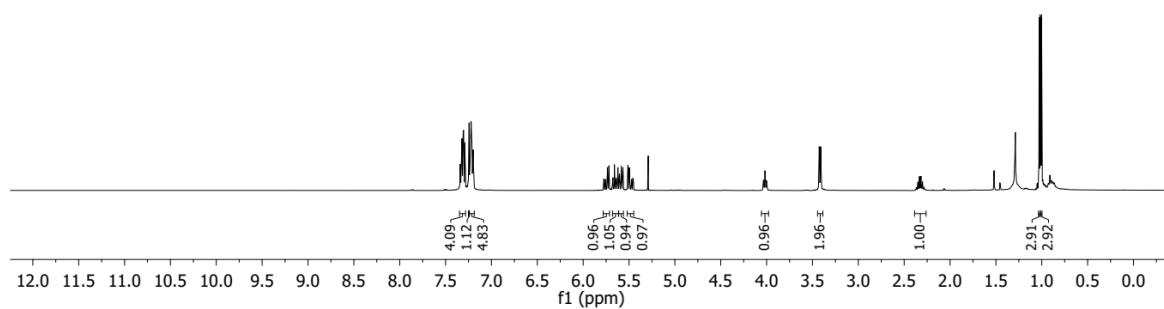

KKP-223  
single pulse decoupled gated NOE

144.184  
140.870  
138.524  
134.432  
129.406  
128.243  
128.642  
128.467  
128.021  
126.216  
126.046  
51.091  
39.103  
31.156  
22.716  
22.652

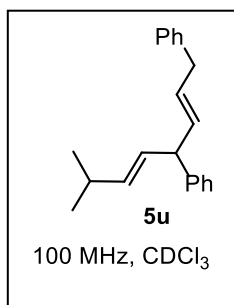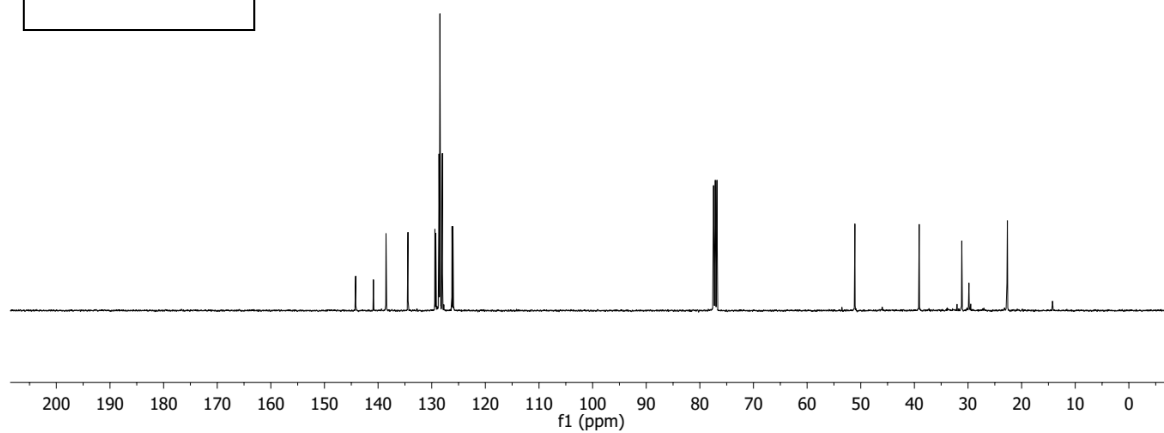

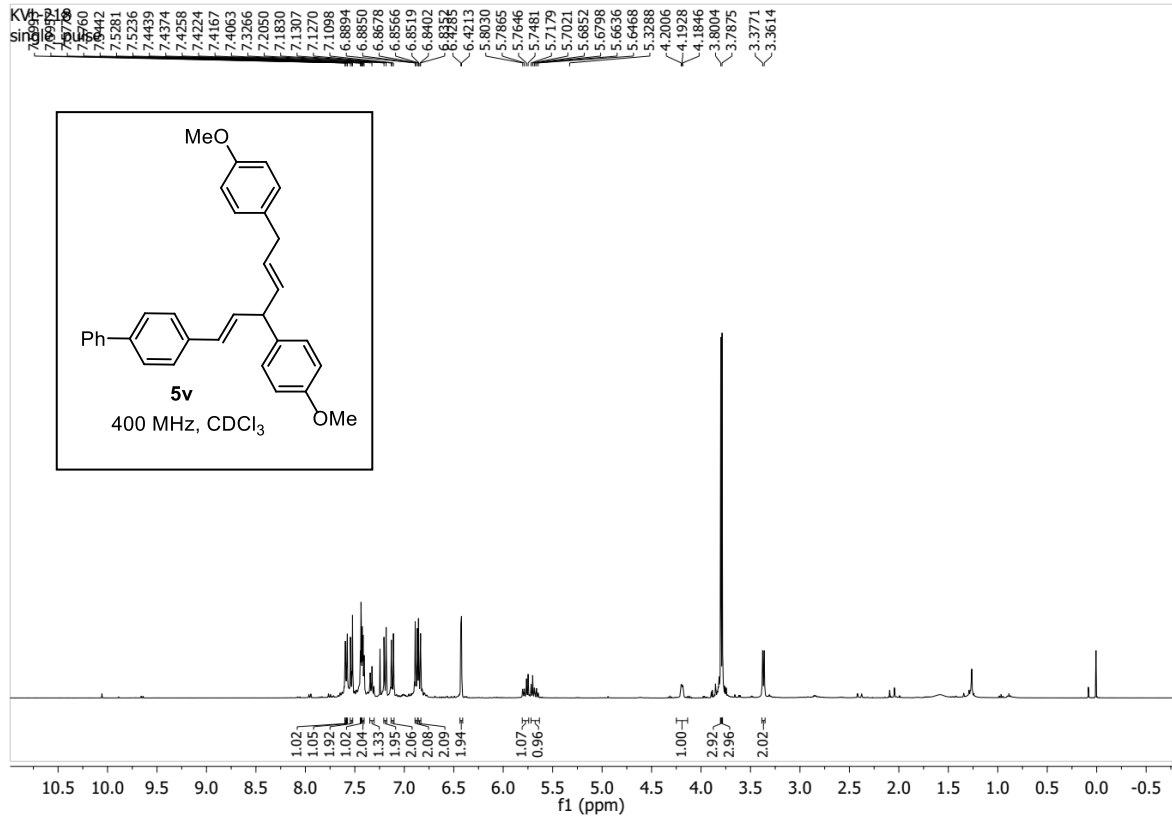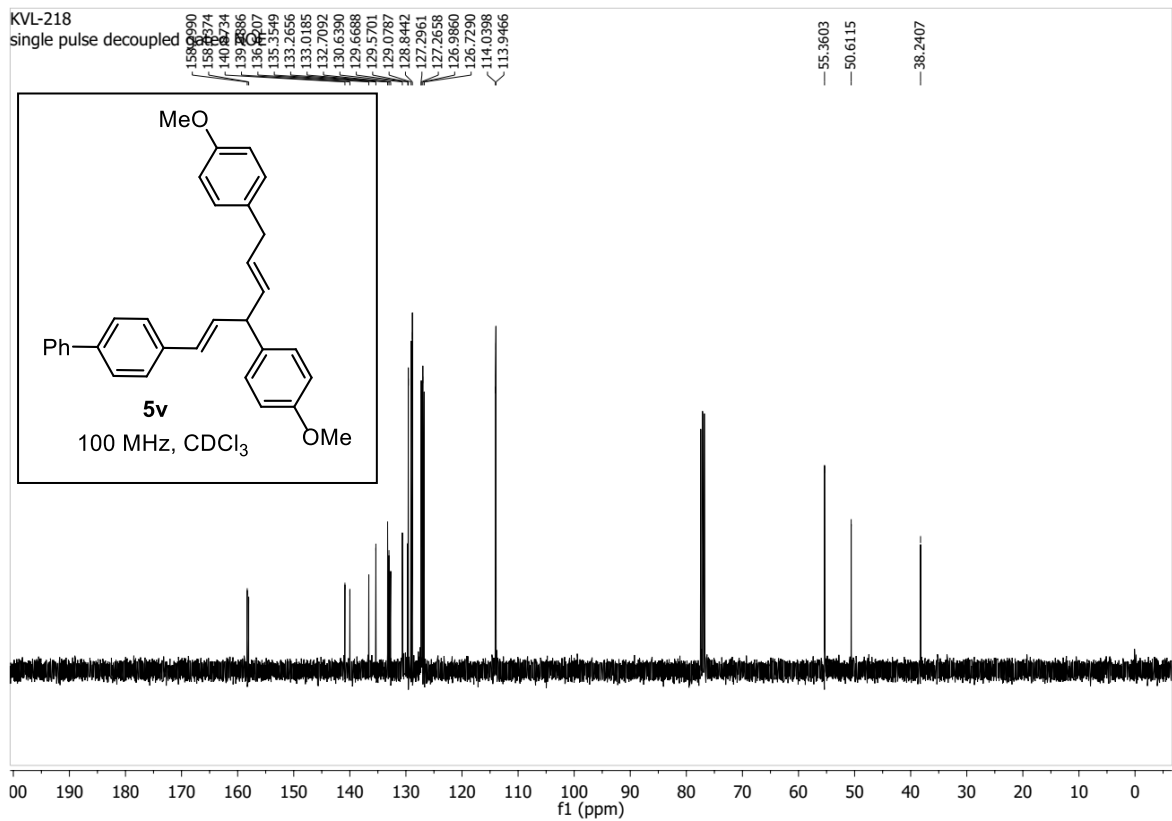

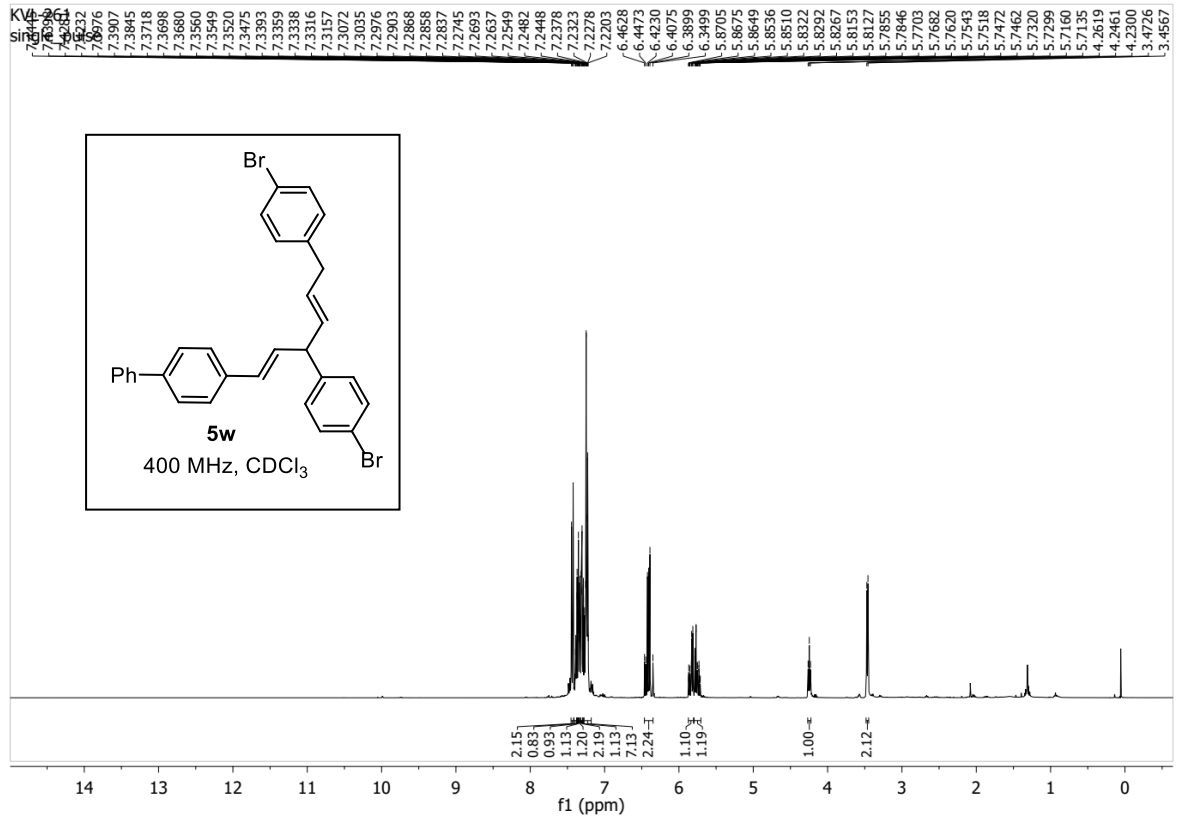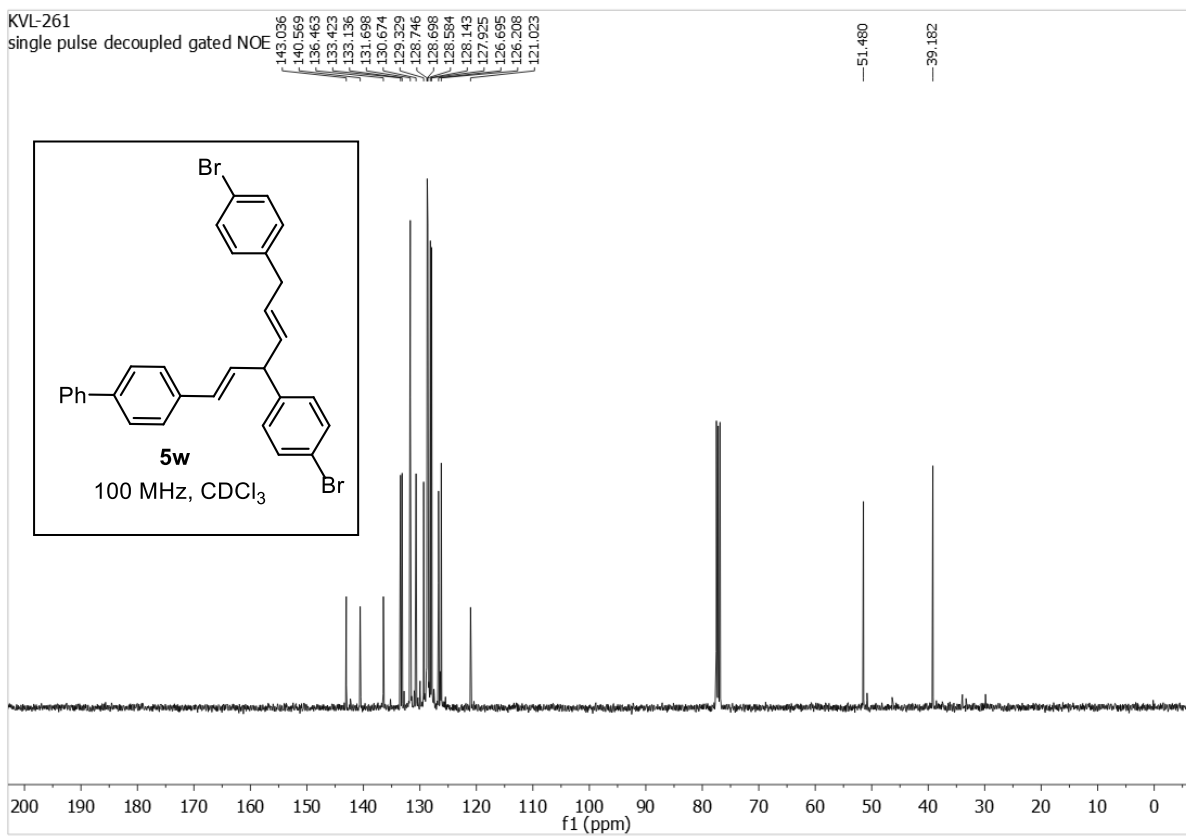



05-KVL-290/2  
 KVL-290 600 MHz, CDCl<sub>3</sub>  
 7.601, 7.599, 7.499, 7.497, 7.486, 7.484, 7.407, 7.395, 7.382, 7.380, 7.377, 7.388, 7.384, 7.275, 7.214, 7.205, 7.200, 7.191, 7.099, 7.084, 7.070, 7.061, 7.046, 7.032, 6.510, 6.483, 6.477, 6.467, 6.451, 6.441, 5.846, 5.835, 5.821, 5.809, 5.769, 5.758, 5.747, 5.722, 5.733, 4.286, 4.285, 4.275, 3.461, 3.451

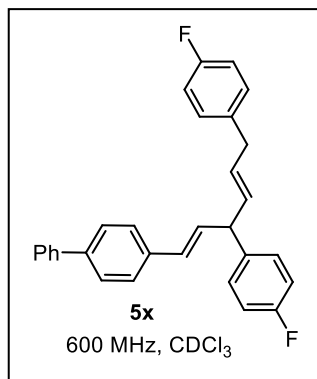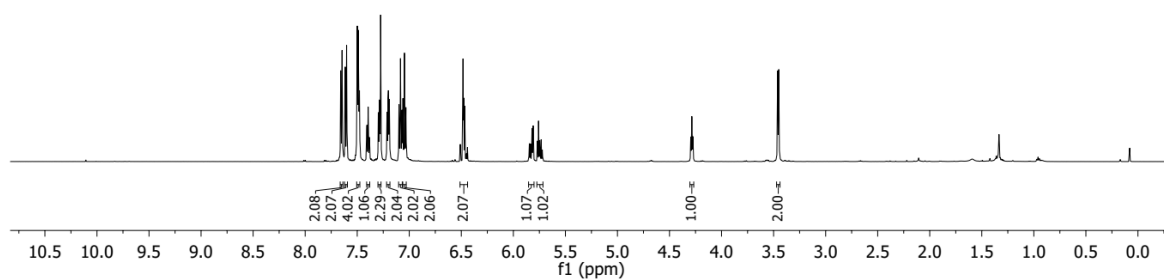

05-KVL-290/2  
 KVL-290 13C NMR  
 163.989, 161.821, 160.367, 160.205, 144.772, 133.717, 138.285, 138.265, 135.811, 135.562, 135.542, 132.832, 131.741, 130.062, 129.686, 129.519, 129.468, 129.070, 129.018, 128.388, 128.891, 126.837, 126.501, 126.267, 115.008, 114.869, 114.730

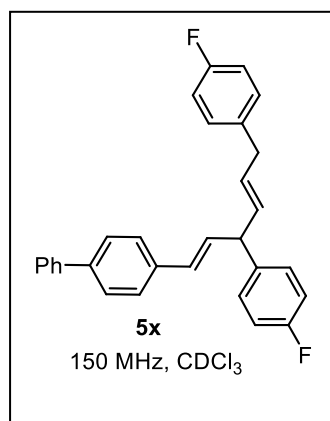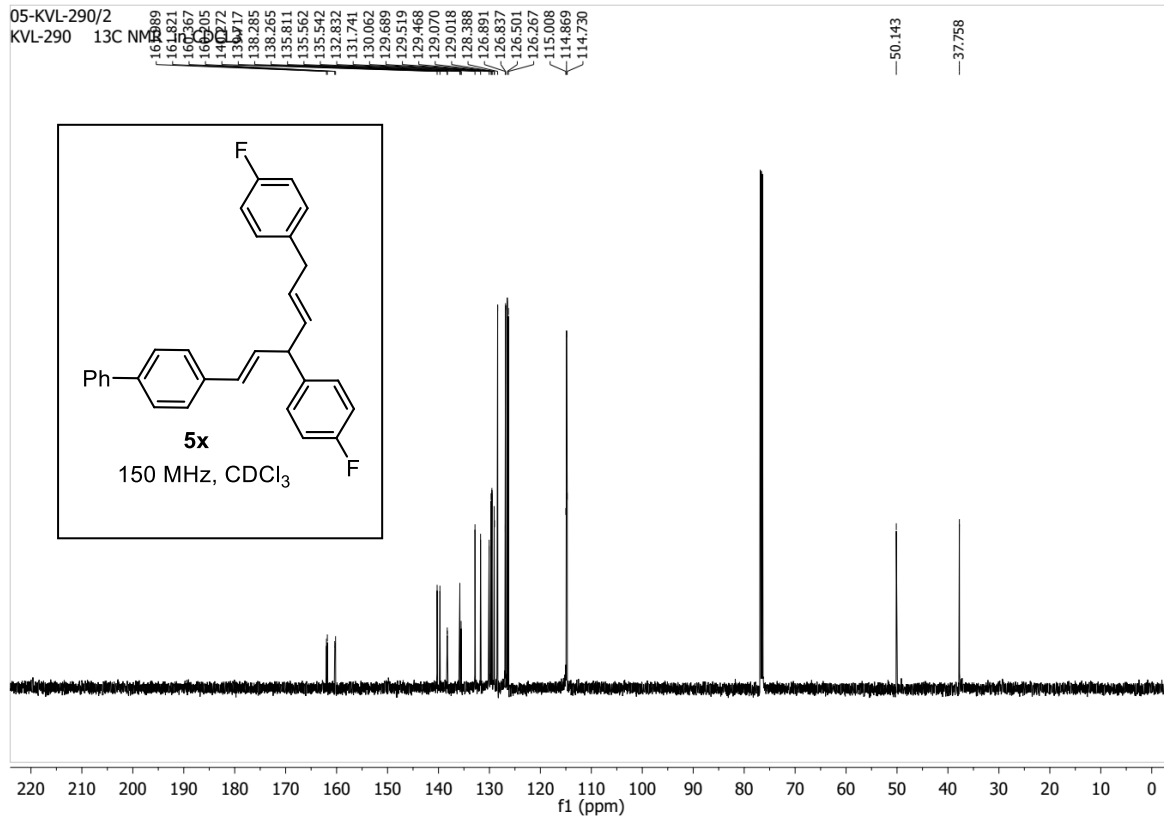

KVL-269  
single pulse

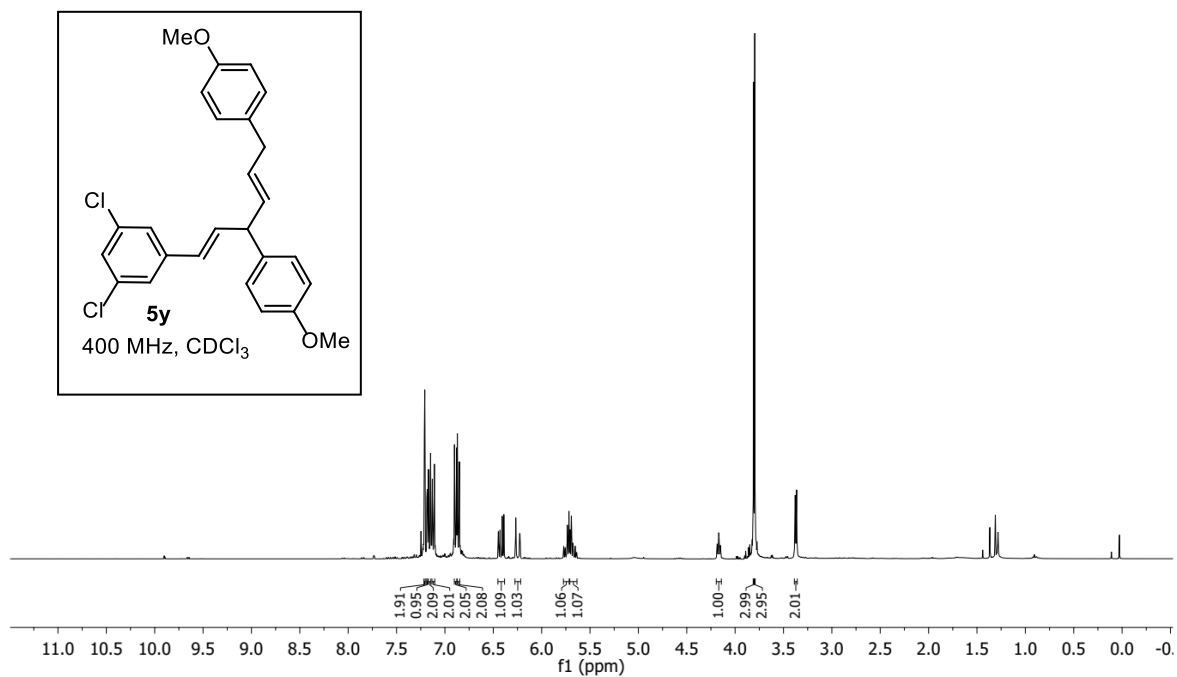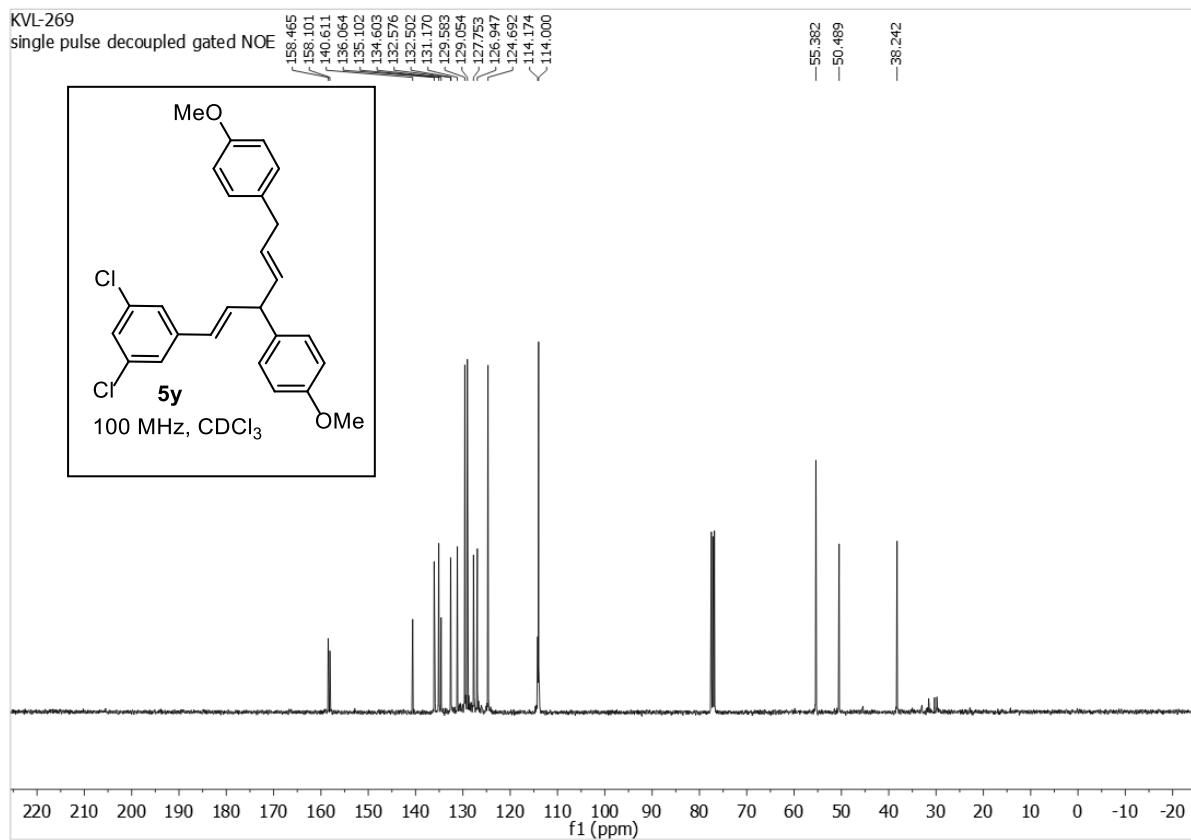

KVL-404  
 single pulse  
 13.113  
 7.102  
 6.886  
 6.881  
 6.854  
 6.849  
 6.844  
 6.837  
 6.832  
 5.711  
 5.708  
 5.694  
 5.692  
 5.689  
 5.673  
 5.670  
 5.668  
 5.656  
 5.653  
 5.651  
 5.612  
 5.610  
 5.596  
 5.594  
 5.583  
 5.580  
 5.577  
 5.574  
 5.572  
 5.566  
 5.563  
 5.558  
 5.555  
 5.544  
 5.541  
 5.527  
 5.525  
 5.470  
 5.468  
 5.455  
 5.452  
 5.432  
 5.429  
 5.416  
 5.414  
 3.964  
 3.948  
 3.931  
 3.794  
 3.345  
 3.329  
 2.365  
 2.348  
 2.331  
 2.315  
 2.298  
 2.281  
 2.265  
 2.248  
 1.012  
 1.005  
 0.995  
 0.988

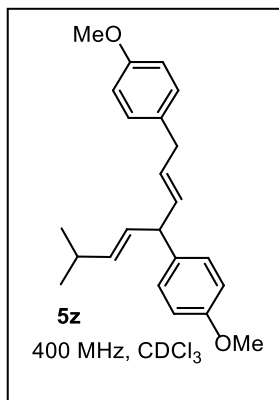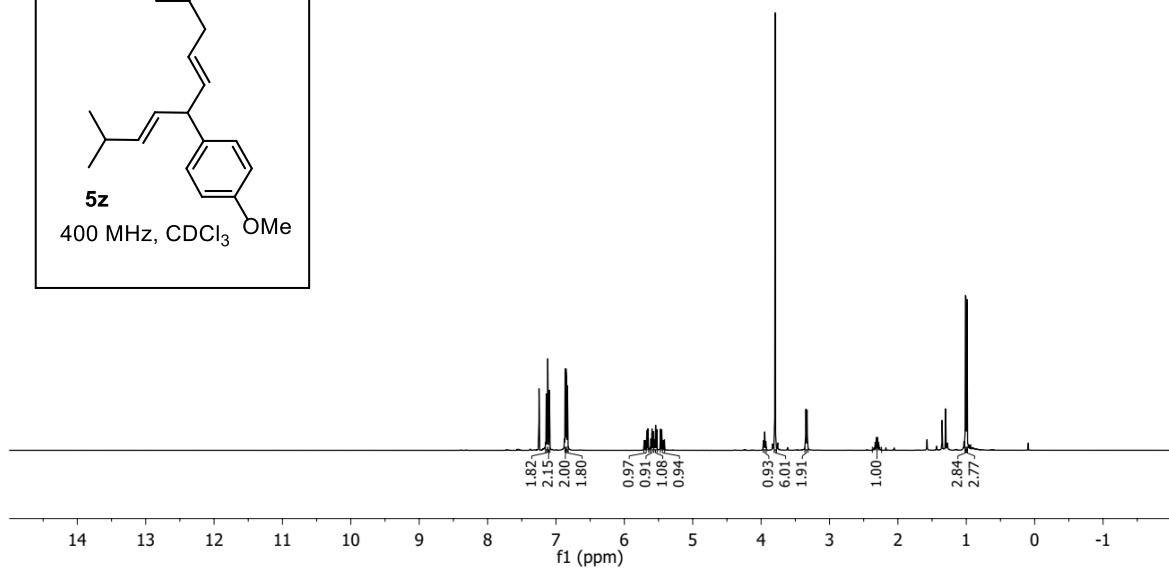

KVL-404  
 single pulse decoupled gated NOE

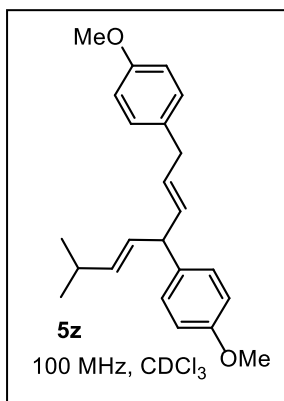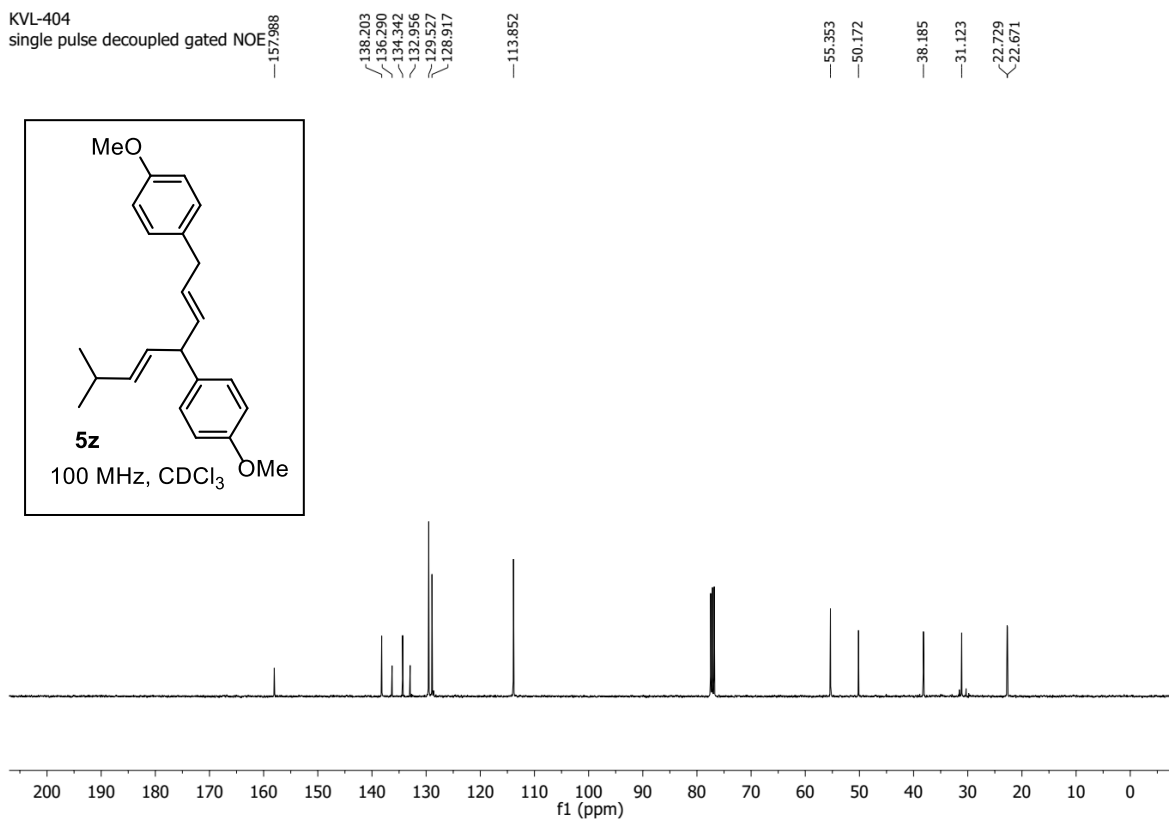

7.806  
 7.804  
 7.697  
 7.695  
 7.683  
 7.581  
 7.551  
 7.530  
 7.453  
 7.449  
 7.444  
 7.438  
 7.432  
 7.430  
 7.424  
 7.417  
 7.411  
 7.351  
 7.348  
 7.345  
 7.335  
 7.330  
 7.324  
 7.311  
 7.302  
 7.204  
 7.199  
 7.187  
 7.182  
 7.129  
 7.108  
 6.891  
 6.885  
 6.874  
 6.869  
 6.861  
 6.857  
 6.845  
 6.839  
 6.835  
 6.423  
 6.417  
 6.413  
 6.408  
 6.385  
 6.344  
 6.297  
 6.256  
 5.673  
 5.656  
 5.635  
 5.632  
 5.618  
 5.615  
 5.590  
 5.580  
 5.555  
 5.553  
 5.539  
 5.514  
 5.500  
 5.498  
 4.135  
 3.333  
 3.320  
 1.040  
 1.032  
 1.023  
 1.015

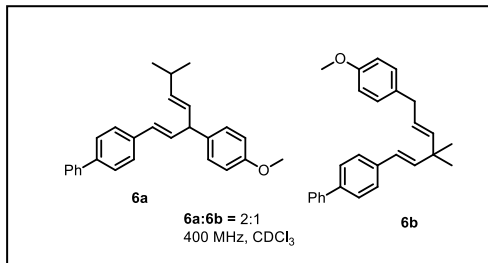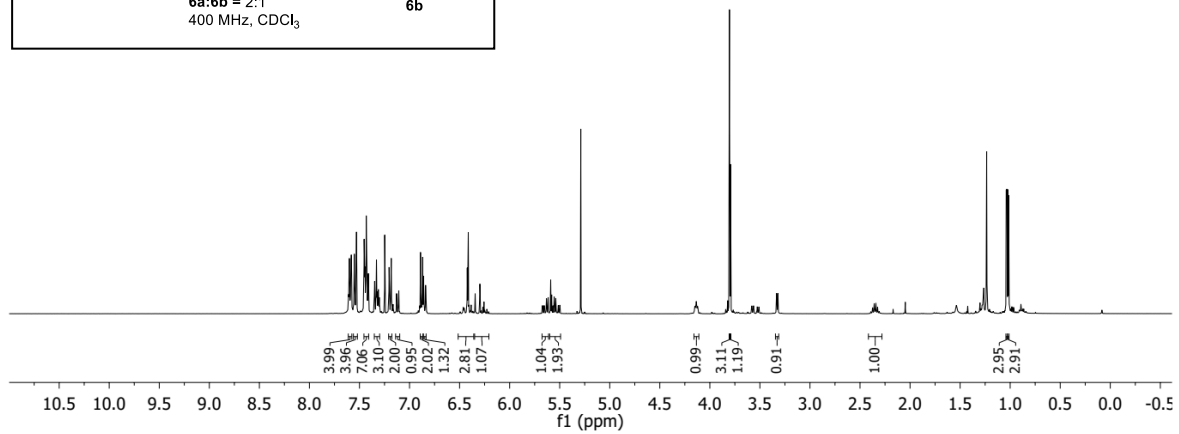

KVL-407B

single pulse decoupled gated NOE

158.721  
 157.984  
 140.899  
 139.987  
 139.925  
 139.806  
 138.829  
 136.730  
 135.709  
 133.457  
 133.097  
 130.673  
 129.705  
 129.572  
 129.499  
 129.394  
 129.150  
 129.050  
 128.961  
 128.838  
 128.813  
 127.340  
 127.305  
 127.275  
 127.259  
 127.119  
 126.986  
 126.708  
 126.601  
 125.595  
 114.034  
 113.970  
 113.893  
 55.350  
 50.555  
 38.858  
 38.303  
 31.212  
 27.642  
 22.696  
 22.651

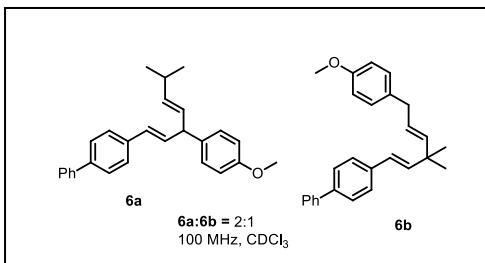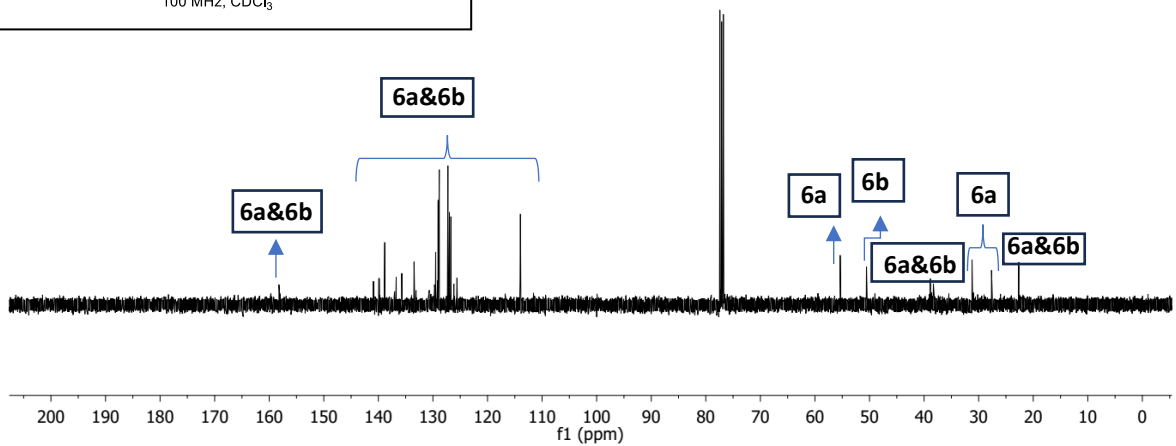

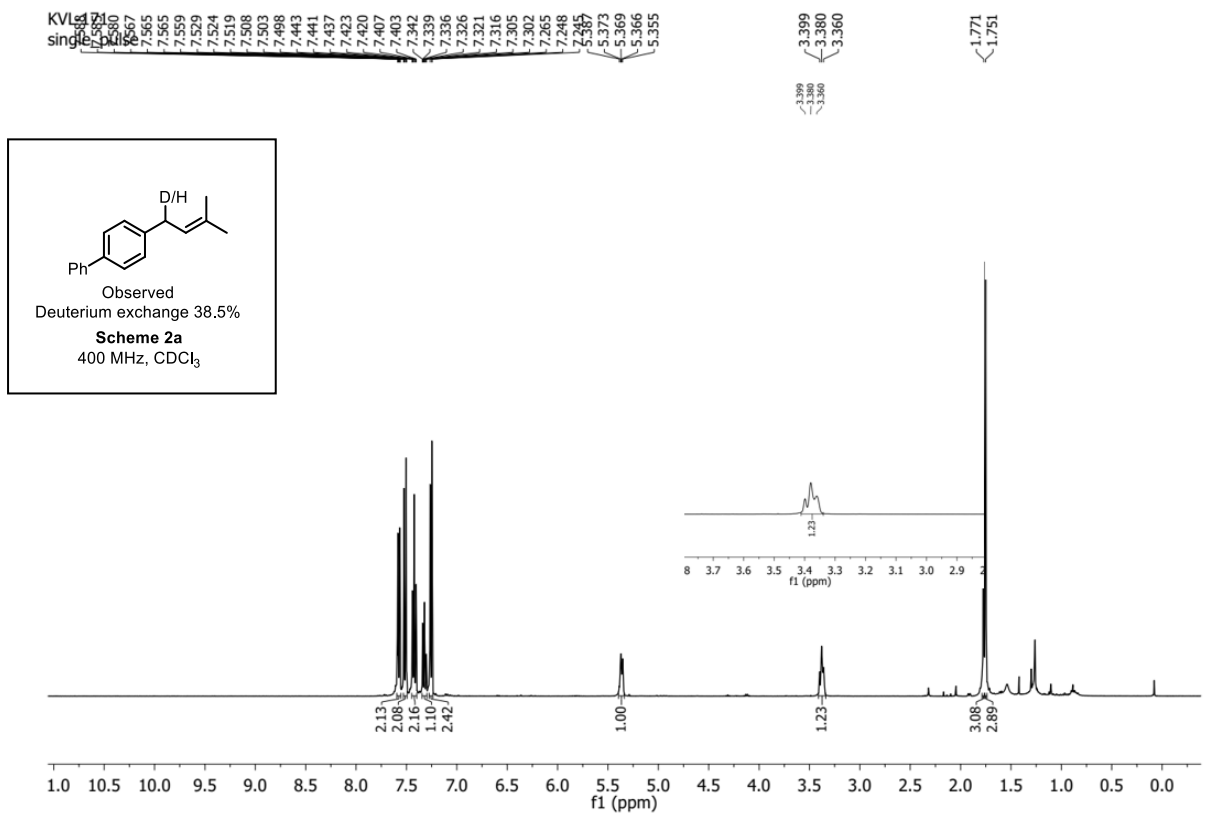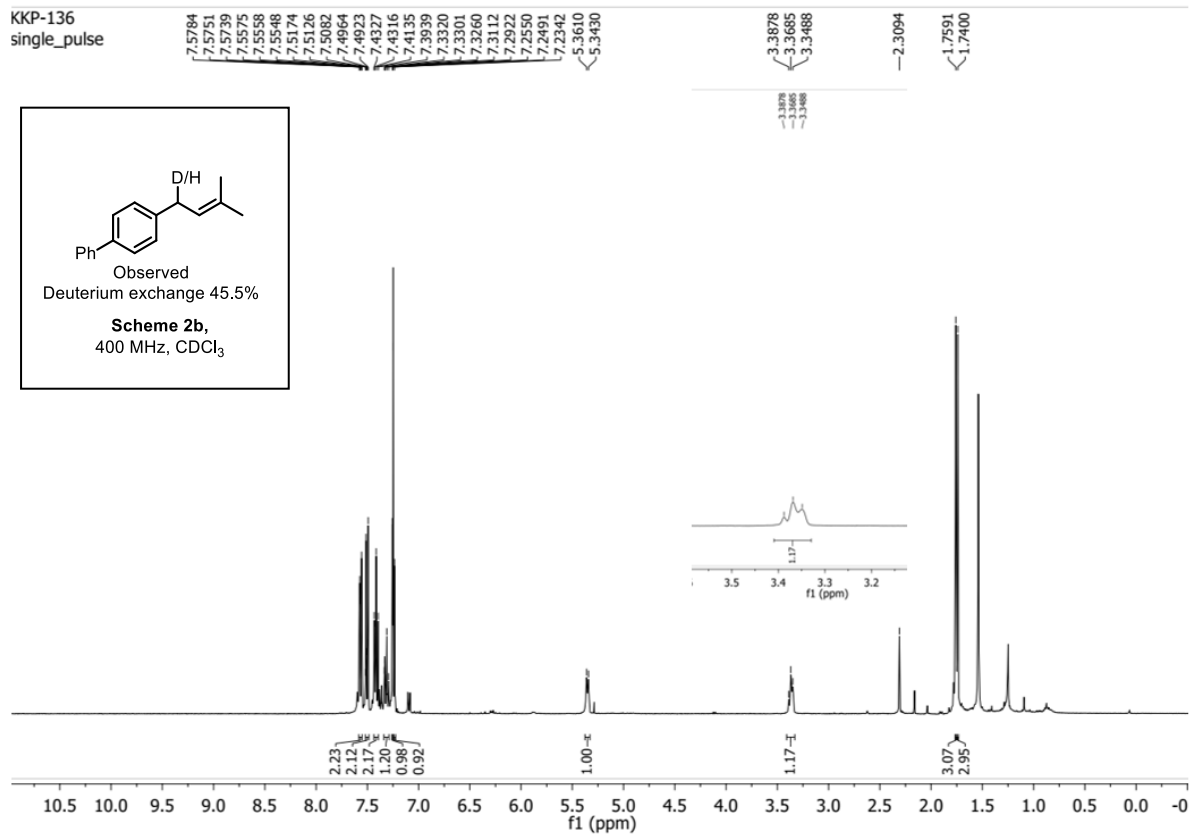

Supplement: d4ob01389a1.pdf [file d4ob01389a1.pdf]
